# Supplementary material for: A Genome-Wide Study of Cytogenetic Changes in Colorectal Cancer Using SNP Microarrays: Opportunities for Future Personalized Treatment
Source: PLoS One. 2012 Feb 20;7(2):e31968. doi: 10.1371/journal.pone.0031968 (PMC3282791; doi:10.1371/journal.pone.0031968)
Supplement: Table S1 — Association of CN changes with MSI status. (CSV) [file pone.0031968.s002.csv]

Chromosome	Start	Stop	cytoband	Total Number of Samples	Total Amplifications	Amplification Average Copy Number	Total Deletions	Deletion Average Copy Number	Total Aberrations	Total Unchanged	Unchanged Average Copy Number	# markers	length (bps)	p-value(MSI)	chisq(MSI)	df(MSI)	# Samples Unchanged MSI = MSI	Average Copy Number Unchanged MSI = MSI	# Samples Amplified MSI = MSI	Average Copy Number Amplified MSI = MSI	# Samples Deleted MSI = MSI	Average Copy Number Deleted MSI = MSI	# Samples Unchanged MSI = MSS	Average Copy Number Unchanged MSI = MSS	# Samples Amplified MSI = MSS	Average Copy Number Amplified MSI = MSS	# Samples Deleted MSI = MSS	Average Copy Number Deleted MSI = MSS
20	41063511	41234903	20q12 - 20q13.11	85	18	2.7283	0	?	18	67	2.12732	27	171393	0.00272267	8.98458	1	24	2.05698	0	?	0	?	43	2.16658	18	2.7283	0	?
20	39893173	41063511	20q12	86	18	2.7283	0	?	18	68	2.12972	170	1170339	0.00299232	8.81214	1	24	2.05698	0	?	0	?	44	2.1694	18	2.7283	0	?
20	37365261	37923830	20q12	86	17	2.74614	0	?	17	69	2.1328	42	558570	0.00418451	8.20196	1	24	2.05698	0	?	0	?	45	2.17323	17	2.74614	0	?
20	38264459	38317363	20q12	86	17	2.74648	0	?	17	69	2.13565	4	52905	0.00418451	8.20196	1	24	2.05698	0	?	0	?	45	2.1776	17	2.74648	0	?
20	38317363	38612750	20q12	86	17	2.74648	0	?	17	69	2.12424	15	295388	0.00418451	8.20196	1	24	2.05698	0	?	0	?	45	2.16011	17	2.74648	0	?
20	39468069	39811064	20q12	86	17	2.7345	0	?	17	69	2.12424	18	342996	0.00418451	8.20196	1	24	2.05698	0	?	0	?	45	2.16011	17	2.7345	0	?
20	39811064	39893173	20q12	86	17	2.7345	0	?	17	69	2.13323	5	82110	0.00418451	8.20196	1	24	2.05698	0	?	0	?	45	2.17389	17	2.7345	0	?
20	37923830	38078435	20q12	85	16	2.7574	0	?	16	69	2.1328	15	154606	0.00535696	7.75481	1	24	2.05698	0	?	0	?	45	2.17323	16	2.7574	0	?
20	38078435	38264459	20q12	85	16	2.7574	0	?	16	69	2.13565	13	186025	0.00535696	7.75481	1	24	2.05698	0	?	0	?	45	2.1776	16	2.7574	0	?
20	41243565	41352942	20q13.11	85	16	2.72603	0	?	16	69	2.12108	19	109378	0.00535696	7.75481	1	24	2.05698	0	?	0	?	45	2.15527	16	2.72603	0	?
20	33886908	34416578	20q11.22 - 20q11.23	86	16	2.7264	0	?	16	70	2.12291	11	529671	0.00580707	7.60922	1	24	2.05698	0	?	0	?	46	2.1573	16	2.7264	0	?
20	34416578	34983846	20q11.23	86	16	2.7264	0	?	16	70	2.12593	14	567269	0.00580707	7.60922	1	24	2.05698	0	?	0	?	46	2.1619	16	2.7264	0	?
20	35486218	37346632	20q11.23 - 20q12	86	16	2.72567	0	?	16	70	2.12274	111	1860415	0.00580707	7.60922	1	24	2.05698	0	?	0	?	46	2.15705	16	2.72567	0	?
20	38612750	39468069	20q12	86	16	2.72603	0	?	16	70	2.12158	65	855320	0.00580707	7.60922	1	24	2.05698	0	?	0	?	46	2.15529	16	2.72603	0	?
20	41352942	41533825	20q13.11	86	16	2.72603	0	?	16	70	2.12356	25	180884	0.00580707	7.60922	1	24	2.05698	0	?	0	?	46	2.1583	16	2.72603	0	?
20	50114448	50345731	20q13.2	86	21	2.72005	0	?	21	65	2.13288	27	231284	0.00652958	7.39802	1	23	2.08177	1	2.65918	0	?	42	2.16087	20	2.7231	0	?
20	34983846	35473272	20q11.23	85	15	2.71596	0	?	15	70	2.12593	25	489427	0.00742868	7.16628	1	24	2.05698	0	?	0	?	46	2.1619	15	2.71596	0	?
20	29337954	29514061	20q11.21	86	15	2.74639	0	?	15	71	2.1356	33	176108	0.00800137	7.03317	1	24	2.05698	0	?	0	?	47	2.17574	15	2.74639	0	?
20	31468154	33886908	20q11.21 - 20q11.22	86	15	2.71211	0	?	15	71	2.1273	71	2418755	0.00800137	7.03317	1	24	2.05698	0	?	0	?	47	2.16321	15	2.71211	0	?
20	49882248	50114448	20q13.2	85	20	2.72792	0	?	20	65	2.13288	39	232201	0.00829649	6.96833	1	23	2.08177	1	2.65918	0	?	42	2.16087	19	2.73154	0	?
20	51414975	51525010	20q13.2	85	20	2.73589	0	?	20	65	2.13049	18	110036	0.00829649	6.96833	1	23	2.08177	1	2.65918	0	?	42	2.15718	19	2.73992	0	?
20	50345731	50986260	20q13.2	86	20	2.72857	0	?	20	66	2.13052	91	640530	0.00913138	6.79695	1	23	2.08177	1	2.65918	0	?	43	2.15661	19	2.73222	0	?
20	51135837	51414975	20q13.2	86	20	2.73589	0	?	20	66	2.13052	49	279139	0.00913138	6.79695	1	23	2.08177	1	2.65918	0	?	43	2.15661	19	2.73992	0	?
20	29608684	29749006	20q11.21	84	14	2.7203	0	?	14	70	2.13515	26	140323	0.00953376	6.72	1	24	2.05698	0	?	0	?	46	2.17593	14	2.7203	0	?
18	67986898	68256665	18q22.3	85	2	3.29542	16	1.28479	18	67	1.82542	25	269768	0.00995495	9.21937	2	21	1.93936	2	3.29542	1	1.42847	46	1.77341	0	?	15	1.27521
18	66367046	66860182	18q22.2	86	2	3.30192	16	1.28479	18	68	1.82085	38	493137	0.0100725	9.19589	2	21	1.93936	2	3.30192	1	1.42847	47	1.7679	0	?	15	1.27521
18	66994747	67394505	18q22.3	86	2	3.3085	16	1.28479	18	68	1.81368	41	399759	0.0100725	9.19589	2	21	1.93936	2	3.3085	1	1.42847	47	1.75752	0	?	15	1.27521
18	67394505	67588391	18q22.3	86	2	3.3085	16	1.28479	18	68	1.82085	21	193887	0.0100725	9.19589	2	21	1.93936	2	3.3085	1	1.42847	47	1.7679	0	?	15	1.27521
20	51525010	51563046	20q13.2	84	20	2.73589	0	?	20	64	2.13285	7	38037	0.0101247	6.61283	1	22	2.08642	1	2.65918	0	?	42	2.15718	19	2.73992	0	?
18	66048450	66119298	18q22.2	84	2	3.16492	16	1.28001	18	66	1.82695	5	70849	0.0101489	9.18078	2	20	1.96031	2	3.16492	1	1.42847	46	1.76897	0	?	15	1.27012
20	29568836	29608684	20q11.21	85	14	2.7203	0	?	14	71	2.13185	6	39849	0.0102305	6.59432	1	24	2.05698	0	?	0	?	47	2.17008	14	2.7203	0	?
20	29749006	29776001	20q11.21	85	14	2.7203	0	?	14	71	2.12679	4	26996	0.0102305	6.59432	1	24	2.05698	0	?	0	?	47	2.16244	14	2.7203	0	?
20	30280511	30352076	20q11.21	85	14	2.7203	0	?	14	71	2.12579	15	71566	0.0102305	6.59432	1	24	2.05698	0	?	0	?	47	2.16093	14	2.7203	0	?
20	30589589	30729833	20q11.21	85	14	2.72128	0	?	14	71	2.13075	29	140245	0.0102305	6.59432	1	24	2.05698	0	?	0	?	47	2.16842	14	2.72128	0	?
20	29514061	29568836	20q11.21	86	14	2.7203	0	?	14	72	2.13651	12	54776	0.0109518	6.47312	1	24	2.05698	0	?	0	?	48	2.17628	14	2.7203	0	?
20	29776001	30280511	20q11.21	86	14	2.7203	0	?	14	72	2.13019	100	504511	0.0109518	6.47312	1	24	2.05698	0	?	0	?	48	2.16679	14	2.7203	0	?
20	30494205	30589589	20q11.21	86	14	2.72128	0	?	14	72	2.12796	20	95385	0.0109518	6.47312	1	24	2.05698	0	?	0	?	48	2.16344	14	2.72128	0	?
20	30729833	31356131	20q11.21	86	14	2.72128	0	?	14	72	2.12704	140	626299	0.0109518	6.47312	1	24	2.05698	0	?	0	?	48	2.16207	14	2.72128	0	?
20	31356131	31468154	20q11.21	86	14	2.72128	0	?	14	72	2.12988	22	112024	0.0109518	6.47312	1	24	2.05698	0	?	0	?	48	2.16633	14	2.72128	0	?
20	51563046	51583227	20q13.2	85	20	2.73589	0	?	20	65	2.13265	4	20182	0.0111083	6.4479	1	22	2.08642	1	2.65918	0	?	43	2.15629	19	2.73992	0	?
20	49826093	49882248	20q13.2	85	19	2.73822	0	?	19	66	2.13539	8	56156	0.0115885	6.37277	1	23	2.08177	1	2.65918	0	?	43	2.16407	18	2.74261	0	?
20	50986260	51135837	20q13.2	85	19	2.7373	0	?	19	66	2.13052	26	149578	0.0115885	6.37277	1	23	2.08177	1	2.65918	0	?	43	2.15661	18	2.74164	0	?
20	45097515	45944505	20q13.12 - 20q13.13	86	19	2.70924	0	?	19	67	2.11791	132	846991	0.0126642	6.21542	1	23	2.04774	1	2.65918	0	?	44	2.1546	18	2.71202	0	?
20	45944505	46384174	20q13.13	86	19	2.72141	0	?	19	67	2.11791	79	439670	0.0126642	6.21542	1	23	2.04774	1	2.65918	0	?	44	2.1546	18	2.72487	0	?
20	30352076	30479353	20q11.21	84	13	2.71705	0	?	13	71	2.12579	25	127278	0.0131255	6.15211	1	24	2.05698	0	?	0	?	47	2.16093	13	2.71705	0	?
20	30479353	30494205	20q11.21	85	13	2.71705	0	?	13	72	2.12796	3	14853	0.0139991	6.03825	1	24	2.05698	0	?	0	?	48	2.16344	13	2.71705	0	?
20	49417978	49826093	20q13.2	84	18	2.72469	0	?	18	66	2.12638	67	408116	0.0147468	5.94646	1	23	2.04774	1	2.65918	0	?	43	2.16844	17	2.72855	0	?
18	27674035	28987086	18q12.1	86	2	2.57593	14	1.25495	16	70	1.83709	65	1313052	0.0156132	8.31928	2	21	1.96717	2	2.57593	1	1.33072	49	1.78135	0	?	13	1.24913
18	28987086	29851765	18q12.1	86	2	2.57593	14	1.25495	16	70	1.83478	40	864680	0.0156132	8.31928	2	21	1.96717	2	2.57593	1	1.33072	49	1.77804	0	?	13	1.24913
18	30146111	31051309	18q12.1 - 18q12.2	86	2	2.57593	14	1.25521	16	70	1.83464	46	905199	0.0156132	8.31928	2	21	1.96671	2	2.57593	1	1.33072	49	1.77804	0	?	13	1.2494
18	31051309	31215225	18q12.2	86	2	2.57593	14	1.2407	16	70	1.83464	8	163917	0.0156132	8.31928	2	21	1.96671	2	2.57593	1	1.33072	49	1.77804	0	?	13	1.23377
13	27226942	27291646	13q12.2	84	13	2.9969	0	?	13	71	2.10699	17	64705	0.0160342	5.79912	1	23	2.07308	0	?	0	?	48	2.12325	13	2.9969	0	?
13	27488128	27527642	13q12.2	84	13	2.9969	0	?	13	71	2.10718	4	39515	0.0160342	5.79912	1	23	2.07308	0	?	0	?	48	2.12353	13	2.9969	0	?
20	46384174	46884755	20q13.13	85	18	2.72469	0	?	18	67	2.11791	90	500582	0.0160552	5.79682	1	23	2.04774	1	2.65918	0	?	44	2.1546	17	2.72855	0	?
20	47540409	47790152	20q13.13	85	18	2.72469	0	?	18	67	2.11791	30	249744	0.0160552	5.79682	1	23	2.04774	1	2.65918	0	?	44	2.1546	17	2.72855	0	?
20	49043644	49417978	20q13.13 - 20q13.2	85	18	2.72469	0	?	18	67	2.13101	74	374335	0.0160552	5.79682	1	23	2.04774	1	2.65918	0	?	44	2.17455	17	2.72855	0	?
20	51700205	51780812	20q13.2	85	18	2.73355	0	?	18	67	2.13439	11	80608	0.0160552	5.79682	1	23	2.08344	1	2.65918	0	?	44	2.16103	17	2.73792	0	?
13	26241605	26375468	13q12.13	85	13	3.05821	0	?	13	72	2.10424	16	133864	0.0170296	5.69332	1	23	2.07308	0	?	0	?	49	2.11887	13	3.05821	0	?
13	27176589	27226942	13q12.2	85	13	2.9969	0	?	13	72	2.10424	3	50354	0.0170296	5.69332	1	23	2.07308	0	?	0	?	49	2.11887	13	2.9969	0	?
13	78052532	78144485	13q31.1	85	13	2.83531	0	?	13	72	2.0687	21	91954	0.0170296	5.69332	1	23	2.02547	0	?	0	?	49	2.08899	13	2.83531	0	?
20	43113497	43841174	20q13.12	86	18	2.72207	0	?	18	68	2.11909	77	727678	0.0174272	5.65283	1	23	2.04774	1	2.65918	0	?	45	2.15556	17	2.72577	0	?
20	44795537	45097515	20q13.12	86	18	2.71878	0	?	18	68	2.11909	48	301979	0.0174272	5.65283	1	23	2.04774	1	2.65918	0	?	45	2.15556	17	2.72228	0	?
20	46884755	47540409	20q13.13	86	18	2.72469	0	?	18	68	2.11877	63	655655	0.0174272	5.65283	1	23	2.04774	1	2.65918	0	?	45	2.15507	17	2.72855	0	?
18	29865814	30046662	18q12.1	84	2	2.57593	13	1.2635	15	69	1.83379	7	180849	0.0189861	7.92809	2	20	1.97037	2	2.57593	1	1.33072	49	1.77804	0	?	12	1.2579
20	51629698	51700205	20q13.2	84	18	2.73355	0	?	18	66	2.13616	3	70508	0.0191448	5.48824	1	22	2.08642	1	2.65918	0	?	44	2.16103	17	2.73792	0	?
20	51780812	52002100	20q13.2	84	18	2.73355	0	?	18	66	2.12943	42	221289	0.0191448	5.48824	1	22	2.06624	1	2.65918	0	?	44	2.16103	17	2.73792	0	?
13	52792108	52879698	13q21.1	86	12	2.79104	0	?	12	74	2.08496	5	87591	0.0201549	5.39843	1	24	2.05301	0	?	0	?	50	2.1003	12	2.79104	0	?
20	51589469	51629698	20q13.2	85	18	2.73355	0	?	18	67	2.13302	8	40230	0.0207237	5.34988	1	22	2.08642	1	2.65918	0	?	45	2.1558	17	2.73792	0	?
20	52002100	52123812	20q13.2	85	18	2.73355	0	?	18	67	2.12613	26	121713	0.0207237	5.34988	1	22	2.06624	1	2.65918	0	?	45	2.15541	17	2.73792	0	?
13	26375468	26534701	13q12.13	84	12	2.85606	0	?	12	72	2.10424	27	159234	0.021588	5.27869	1	23	2.07308	0	?	0	?	49	2.11887	12	2.85606	0	?
13	27527642	27662425	13q12.2	84	12	2.96768	0	?	12	72	2.10756	6	134784	0.021588	5.27869	1	23	2.07308	0	?	0	?	49	2.12374	12	2.96768	0	?
13	75073176	75141947	13q22.2	84	12	2.79609	0	?	12	72	2.07766	6	68772	0.021588	5.27869	1	23	2.02547	0	?	0	?	49	2.10215	12	2.79609	0	?
13	76113076	76472449	13q22.3	84	12	2.85163	0	?	12	72	2.0687	37	359374	0.021588	5.27869	1	23	2.02547	0	?	0	?	49	2.08899	12	2.85163	0	?
20	42380785	43113497	20q13.12	85	17	2.7221	0	?	17	68	2.11909	93	732713	0.0220742	5.23992	1	23	2.04774	1	2.65918	0	?	45	2.15556	16	2.72603	0	?
13	76007684	76069205	13q22.3	85	12	2.79609	0	?	12	73	2.0713	5	61522	0.0228039	5.18338	1	23	2.02547	0	?	0	?	50	2.09239	12	2.79609	0	?
13	78144485	78206351	13q31.1	85	12	2.84767	0	?	12	73	2.0746	4	61867	0.0228039	5.18338	1	23	2.02547	0	?	0	?	50	2.0972	12	2.84767	0	?
18	65964331	66048450	18q22.2	85	2	3.16492	17	1.29128	19	66	1.82695	3	84120	0.0235348	7.49855	2	20	1.96031	2	3.16492	2	1.44999	46	1.76897	0	?	15	1.27012
18	68256665	68354267	18q22.3	85	2	3.29542	17	1.2958	19	66	1.82616	12	97603	0.0235348	7.49855	2	20	1.94747	2	3.29542	2	1.45021	46	1.77341	0	?	15	1.27521
18	65384441	65964331	18q22.2	86	2	3.16492	17	1.29128	19	67	1.8258	51	579891	0.0235853	7.49426	2	20	1.96031	2	3.16492	2	1.44999	47	1.76856	0	?	15	1.27012
18	68354267	69132203	18q22.3	86	2	3.29542	17	1.2958	19	67	1.82177	76	777937	0.0235853	7.49426	2	20	1.94747	2	3.29542	2	1.45021	47	1.76828	0	?	15	1.27521
20	41533825	42380785	20q13.11 - 20q13.12	86	17	2.7221	0	?	17	69	2.12145	143	846961	0.0238063	5.10869	1	23	2.04774	1	2.65918	0	?	46	2.1583	16	2.72603	0	?
20	43841174	44795537	20q13.12	86	17	2.7221	0	?	17	69	2.1195	157	954364	0.0238063	5.10869	1	23	2.04774	1	2.65918	0	?	46	2.15537	16	2.72603	0	?
13	22209448	22272682	13q12.12	84	11	2.82048	0	?	11	73	2.10006	9	63235	0.0244417	5.06301	1	24	2.06469	0	?	0	?	49	2.11739	11	2.82048	0	?
13	22747650	22798139	13q12.12	85	11	2.87992	0	?	11	74	2.10065	9	50490	0.0257728	4.9712	1	24	2.06469	0	?	0	?	50	2.11791	11	2.87992	0	?
13	27752600	27782594	13q12.2	85	11	2.81138	0	?	11	74	2.10786	3	29995	0.0257728	4.9712	1	24	2.05999	0	?	0	?	50	2.13084	11	2.81138	0	?
18	46963284	47007998	18q21.2	84	0	?	17	1.22514	17	67	1.83462	3	44715	0.0260272	4.95421	1	22	1.97241	0	?	1	1.42847	45	1.76726	0	?	16	1.21243
18	11170025	11736289	18p11.21	86	3	2.86355	12	1.31778	15	71	1.88353	78	566265	0.0270539	7.21985	2	22	1.99195	2	2.64705	0	?	49	1.83485	1	3.29654	12	1.31778
13	22368331	22501544	13q12.12	86	11	2.82048	0	?	11	75	2.09807	22	133214	0.027129	4.88258	1	24	2.06469	0	?	0	?	51	2.11378	11	2.82048	0	?
13	22501544	22747650	13q12.12	86	11	2.87992	0	?	11	75	2.09807	46	246107	0.027129	4.88258	1	24	2.06469	0	?	0	?	51	2.11378	11	2.87992	0	?
13	43906546	44302984	13q14.11 - 13q14.12	86	11	2.78379	0	?	11	75	2.09742	21	396439	0.027129	4.88258	1	24	2.05651	0	?	0	?	51	2.11667	11	2.78379	0	?
13	52442583	52506920	13q21.1	86	11	2.79168	0	?	11	75	2.0941	11	64338	0.027129	4.88258	1	24	2.06516	0	?	0	?	51	2.10772	11	2.79168	0	?
13	52506920	52792108	13q21.1	86	11	2.79168	0	?	11	75	2.09021	19	285189	0.027129	4.88258	1	24	2.05301	0	?	0	?	51	2.10772	11	2.79168	0	?
17	8169322	8228632	17p13.1	86	0	?	11	1.28467	11	75	1.87087	10	59311	0.027129	4.88258	1	24	1.96445	0	?	0	?	51	1.82682	0	?	11	1.28467
17	8235733	8301119	17p13.1	86	0	?	11	1.32639	11	75	1.86714	8	65387	0.027129	4.88258	1	24	1.9528	0	?	0	?	51	1.82682	0	?	11	1.32639
17	8301119	8512694	17p13.1	86	0	?	11	1.30599	11	75	1.86714	16	211576	0.027129	4.88258	1	24	1.9528	0	?	0	?	51	1.82682	0	?	11	1.30599
17	8512694	9103276	17p13.1	86	0	?	11	1.30599	11	75	1.86545	100	590583	0.027129	4.88258	1	24	1.9528	0	?	0	?	51	1.82434	0	?	11	1.30599
20	52749891	52777204	20q13.2	85	21	2.80968	0	?	21	64	2.13185	3	27314	0.028145	4.81916	1	22	2.04071	2	2.93696	0	?	42	2.17959	19	2.79628	0	?
20	52777204	52868000	20q13.2	85	21	2.84135	0	?	21	64	2.13185	12	90797	0.028145	4.81916	1	22	2.04071	2	2.93696	0	?	42	2.17959	19	2.83128	0	?
13	22085449	22119130	13q12.11	84	11	2.82048	0	?	11	73	2.10087	4	33682	0.0289176	4.77251	1	23	2.05206	0	?	0	?	50	2.12332	11	2.82048	0	?
13	76069205	76113076	13q22.3	84	11	2.82065	0	?	11	73	2.0713	3	43872	0.0289176	4.77251	1	23	2.02547	0	?	0	?	50	2.09239	11	2.82065	0	?
20	55502436	55731710	20q13.31	85	16	2.74668	0	?	16	69	2.13868	39	229275	0.0301335	4.70166	1	23	2.05153	1	2.65918	0	?	46	2.18226	15	2.75251	0	?
20	55950127	56208086	20q13.32	85	16	2.74668	0	?	16	69	2.12993	40	257960	0.0301335	4.70166	1	23	2.05153	1	2.65918	0	?	46	2.16913	15	2.75251	0	?
13	43575837	43906546	13q14.11	85	11	2.78379	0	?	11	74	2.09463	41	330710	0.0303876	4.68723	1	23	2.04577	0	?	0	?	51	2.11667	11	2.78379	0	?
20	52723303	52749891	20q13.2	86	21	2.80968	0	?	21	65	2.12412	5	26589	0.0307474	4.66701	1	22	2.04071	2	2.93696	0	?	43	2.16679	19	2.79628	0	?
18	25696144	25848877	18q12.1	85	1	2.63035	16	1.19137	17	68	1.84499	7	152734	0.0313153	6.9273	2	22	1.95473	1	2.63035	1	1.33072	46	1.7925	0	?	15	1.18208
18	25848877	26097661	18q12.1	85	1	2.63035	16	1.22653	17	68	1.84499	19	248785	0.0313153	6.9273	2	22	1.95473	1	2.63035	1	1.33072	46	1.7925	0	?	15	1.21959
18	70470399	70651069	18q22.3	85	1	2.80908	16	1.28165	17	68	1.83202	26	180671	0.0313153	6.9273	2	22	1.97638	1	2.80908	1	1.42847	46	1.76298	0	?	15	1.27186
20	54358315	55502436	20q13.2 - 20q13.31	86	16	2.74668	0	?	16	70	2.13013	178	1144122	0.0322986	4.58258	1	23	2.05153	1	2.65918	0	?	47	2.1686	15	2.75251	0	?
20	55731710	55950127	20q13.31 - 20q13.32	86	16	2.74668	0	?	16	70	2.13197	36	218418	0.0322986	4.58258	1	23	2.05153	1	2.65918	0	?	47	2.17133	15	2.75251	0	?
20	56208086	57487233	20q13.32	86	16	2.74668	0	?	16	70	2.13208	183	1279148	0.0322986	4.58258	1	23	2.05153	1	2.65918	0	?	47	2.1715	15	2.75251	0	?
18	24869106	25348255	18q12.1	86	1	2.63035	16	1.19514	17	69	1.84807	33	479150	0.0324549	6.85581	2	22	1.95473	1	2.63035	1	1.33072	47	1.79815	0	?	15	1.1861
18	26097661	26212349	18q12.1	86	1	2.63035	16	1.22653	17	69	1.844	10	114689	0.0324549	6.85581	2	22	1.95473	1	2.63035	1	1.33072	47	1.79217	0	?	15	1.21959
18	70081489	70470399	18q22.3	86	1	2.80908	16	1.28165	17	69	1.83463	35	388911	0.0324549	6.85581	2	22	1.97638	1	2.80908	1	1.42847	47	1.76828	0	?	15	1.27186
18	70651069	72160647	18q22.3 - 18q23	86	1	2.80908	16	1.28165	17	69	1.83404	215	1509579	0.0324549	6.85581	2	22	1.97638	1	2.80908	1	1.42847	47	1.76741	0	?	15	1.27186
18	72160647	72643111	18q23	86	1	2.80908	16	1.28165	17	69	1.83866	81	482465	0.0324549	6.85581	2	22	1.97638	1	2.80908	1	1.42847	47	1.77419	0	?	15	1.27186
18	72983552	73325061	18q23	86	1	2.80908	16	1.28615	17	69	1.83866	67	341510	0.0324549	6.85581	2	22	1.97638	1	2.80908	1	1.42847	47	1.77419	0	?	15	1.27666
18	8751530	8819326	18p11.22	85	3	2.86355	11	1.30537	14	71	1.88631	15	67797	0.0337141	6.77968	2	22	1.99195	2	2.64705	0	?	49	1.83888	1	3.29654	11	1.30537
18	8819326	8836123	18p11.22	86	3	2.86355	11	1.30537	14	72	1.88505	6	16798	0.0342309	6.74925	2	22	1.99195	2	2.64705	0	?	50	1.83801	1	3.29654	11	1.30537
18	9423338	11170025	18p11.22 - 18p11.21	86	3	2.86355	11	1.30559	14	72	1.88231	264	1746688	0.0342309	6.74925	2	22	1.99195	2	2.64705	0	?	50	1.83406	1	3.29654	11	1.30559
18	11736289	12061009	18p11.21	86	3	2.86355	11	1.30559	14	72	1.88186	46	324721	0.0342309	6.74925	2	22	1.99195	2	2.64705	0	?	50	1.83342	1	3.29654	11	1.30559
18	12061009	12185204	18p11.21	86	3	2.86355	11	1.30559	14	72	1.88667	11	124196	0.0342309	6.74925	2	22	1.99195	2	2.64705	0	?	50	1.84034	1	3.29654	11	1.30559
13	22798139	22892254	13q12.12	85	10	2.8368	0	?	10	75	2.10569	13	94116	0.0347175	4.45902	1	24	2.06469	0	?	0	?	51	2.12499	10	2.8368	0	?
13	22892254	22944768	13q12.12	85	10	2.8368	0	?	10	75	2.10773	7	52515	0.0347175	4.45902	1	24	2.06469	0	?	0	?	51	2.12798	10	2.8368	0	?
13	28368571	28619557	13q12.3	85	10	2.83223	0	?	10	75	2.09569	22	250987	0.0347175	4.45902	1	24	2.05999	0	?	0	?	51	2.11248	10	2.83223	0	?
13	28619557	28787874	13q12.3	85	10	2.83223	0	?	10	75	2.10497	23	168318	0.0347175	4.45902	1	24	2.05999	0	?	0	?	51	2.12613	10	2.83223	0	?
13	48363590	48857565	13q14.2	85	10	2.7835	0	?	10	75	2.10998	67	493976	0.0347175	4.45902	1	24	2.0665	0	?	0	?	51	2.13045	10	2.7835	0	?
17	5369465	5474307	17p13.2	85	0	?	10	1.29371	10	75	1.87701	11	104843	0.0347175	4.45902	1	24	1.98839	0	?	0	?	51	1.82459	0	?	10	1.29371
17	5474307	5698153	17p13.2	85	0	?	10	1.26758	10	75	1.87701	39	223847	0.0347175	4.45902	1	24	1.98839	0	?	0	?	51	1.82459	0	?	10	1.26758
18	36275082	36361511	18q12.3	85	1	3.49704	16	1.28796	17	68	1.83554	5	86430	0.0349173	6.70955	2	21	1.96017	1	3.49704	1	1.42847	47	1.77986	0	?	15	1.27859
18	66860182	66988981	18q22.2 - 18q22.3	85	1	3.63137	16	1.28479	17	68	1.82085	16	128800	0.0349173	6.70955	2	21	1.93936	1	3.63137	1	1.42847	47	1.7679	0	?	15	1.27521
18	67588391	67960415	18q22.3	85	1	3.63137	16	1.28479	17	68	1.82085	31	372025	0.0349173	6.70955	2	21	1.93936	1	3.63137	1	1.42847	47	1.7679	0	?	15	1.27521
18	15179023	15369065	18p11.21	85	3	2.86355	11	1.27663	14	71	1.86665	7	190043	0.0352009	6.69337	2	21	1.97515	2	2.64705	0	?	50	1.82108	1	3.29654	11	1.27663
13	21599925	22066201	13q12.11	86	10	2.79847	0	?	10	76	2.10017	86	466277	0.0363565	4.38031	1	24	2.06553	0	?	0	?	52	2.11616	10	2.79847	0	?
13	22944768	23191030	13q12.12	86	10	2.8368	0	?	10	76	2.10529	34	246263	0.0363565	4.38031	1	24	2.06469	0	?	0	?	52	2.12402	10	2.8368	0	?
13	23191030	23296845	13q12.12	86	10	2.8368	0	?	10	76	2.11185	11	105816	0.0363565	4.38031	1	24	2.06469	0	?	0	?	52	2.13362	10	2.8368	0	?
13	23296845	23540412	13q12.12	86	10	2.8368	0	?	10	76	2.10337	37	243568	0.0363565	4.38031	1	24	2.06469	0	?	0	?	52	2.12122	10	2.8368	0	?
13	27813946	28368571	13q12.3	86	10	2.83223	0	?	10	76	2.10073	54	554626	0.0363565	4.38031	1	24	2.05999	0	?	0	?	52	2.11953	10	2.83223	0	?
13	28787874	29792638	13q12.3	86	10	2.83223	0	?	10	76	2.1033	108	1004765	0.0363565	4.38031	1	24	2.05999	0	?	0	?	52	2.12328	10	2.83223	0	?
13	44302984	44457296	13q14.12	86	10	2.77992	0	?	10	76	2.09995	12	154313	0.0363565	4.38031	1	24	2.05651	0	?	0	?	52	2.11999	10	2.77992	0	?
13	45701403	45998555	13q14.12 - 13q14.13	86	10	2.7835	0	?	10	76	2.10168	20	297153	0.0363565	4.38031	1	24	2.0837	0	?	0	?	52	2.10998	10	2.7835	0	?
13	45998555	46158903	13q14.13	86	10	2.7835	0	?	10	76	2.10471	15	160349	0.0363565	4.38031	1	24	2.0837	0	?	0	?	52	2.11441	10	2.7835	0	?
13	46158903	47074575	13q14.13 - 13q14.2	86	10	2.7835	0	?	10	76	2.11076	162	915673	0.0363565	4.38031	1	24	2.0837	0	?	0	?	52	2.12325	10	2.7835	0	?
13	47074575	48363590	13q14.2	86	10	2.7835	0	?	10	76	2.10533	173	1289016	0.0363565	4.38031	1	24	2.0665	0	?	0	?	52	2.12325	10	2.7835	0	?
13	48857565	49853198	13q14.2 - 13q14.3	86	10	2.7835	0	?	10	76	2.10531	70	995634	0.0363565	4.38031	1	24	2.0665	0	?	0	?	52	2.12322	10	2.7835	0	?
13	49978277	50364566	13q14.3	86	10	2.7835	0	?	10	76	2.10488	39	386290	0.0363565	4.38031	1	24	2.06516	0	?	0	?	52	2.12322	10	2.7835	0	?
13	50364566	52290080	13q14.3 - 13q21.1	86	10	2.7835	0	?	10	76	2.09831	102	1925515	0.0363565	4.38031	1	24	2.06516	0	?	0	?	52	2.11361	10	2.7835	0	?
13	52290080	52442583	13q21.1	86	10	2.7835	0	?	10	76	2.09667	18	152504	0.0363565	4.38031	1	24	2.06516	0	?	0	?	52	2.11122	10	2.7835	0	?
13	100131413	100177845	13q32.3	86	10	2.83698	0	?	10	76	2.05674	5	46433	0.0363565	4.38031	1	24	2.04226	0	?	0	?	52	2.06342	10	2.83698	0	?
17	5698153	6253449	17p13.2	86	0	?	10	1.26758	10	76	1.87888	63	555297	0.0363565	4.38031	1	24	1.98839	0	?	0	?	52	1.82833	0	?	10	1.26758
13	72552957	72840335	13q22.1	84	15	2.85357	0	?	15	69	2.07371	38	287379	0.0382621	4.29333	1	23	2.02547	1	3.3665	0	?	46	2.09783	14	2.81694	0	?
20	52139584	52293449	20q13.2	85	20	2.79673	0	?	20	65	2.12554	35	153866	0.0382925	4.29198	1	22	2.06624	2	2.93696	0	?	43	2.15588	18	2.78115	0	?
20	52293449	52341436	20q13.2	85	20	2.79673	0	?	20	65	2.12093	6	47988	0.0382925	4.29198	1	22	2.05262	2	2.93696	0	?	43	2.15588	18	2.78115	0	?
20	52341436	52374773	20q13.2	85	20	2.79673	0	?	20	65	2.1169	5	33338	0.0382925	4.29198	1	22	2.04071	2	2.93696	0	?	43	2.15588	18	2.78115	0	?
20	52374773	52723303	20q13.2	85	20	2.79673	0	?	20	65	2.12412	37	348531	0.0382925	4.29198	1	22	2.04071	2	2.93696	0	?	43	2.16679	18	2.78115	0	?
20	52868000	52989337	20q13.2	85	20	2.85482	0	?	20	65	2.13395	15	121338	0.0382925	4.29198	1	22	2.04071	2	2.93696	0	?	43	2.18165	18	2.8457	0	?
20	53591986	53617641	20q13.2	85	20	2.85482	0	?	20	65	2.13268	6	25656	0.0382925	4.29198	1	22	2.04071	2	2.93696	0	?	43	2.17973	18	2.8457	0	?
20	53784038	53855607	20q13.2	85	20	2.85415	0	?	20	65	2.13268	13	71570	0.0382925	4.29198	1	22	2.04071	2	2.93696	0	?	43	2.17973	18	2.84495	0	?
18	24424269	24498159	18q12.1	85	1	2.63035	15	1.20329	16	69	1.85126	3	73891	0.0399794	6.43878	2	22	1.97215	1	2.63035	1	1.33072	47	1.79468	0	?	14	1.19418
18	72643111	72983552	18q23	85	1	2.80908	15	1.31479	16	69	1.83866	45	340442	0.0399794	6.43878	2	22	1.97638	1	2.80908	1	1.42847	47	1.77419	0	?	14	1.30667
13	22066201	22085449	13q12.11	85	10	2.79847	0	?	10	75	2.0965	5	19249	0.0403216	4.2043	1	23	2.05206	0	?	0	?	52	2.11616	10	2.79847	0	?
13	23540412	23665060	13q12.12	85	10	2.8368	0	?	10	75	2.09885	38	124649	0.0403216	4.2043	1	23	2.04828	0	?	0	?	52	2.12122	10	2.8368	0	?
13	29792638	30210573	13q12.3	85	10	2.83223	0	?	10	75	2.10041	32	417936	0.0403216	4.2043	1	23	2.04868	0	?	0	?	52	2.12328	10	2.83223	0	?
13	49853198	49978277	13q14.3	85	10	2.7835	0	?	10	75	2.10733	5	125080	0.0403216	4.2043	1	23	2.07141	0	?	0	?	52	2.12322	10	2.7835	0	?
17	2891933	2945487	17p13.3	85	0	?	10	1.24701	10	75	1.87938	3	53555	0.0403216	4.2043	1	23	1.97836	0	?	0	?	52	1.8356	0	?	10	1.24701
13	70779703	71089529	13q21.33	85	15	2.94086	0	?	15	70	2.0693	25	309827	0.0408624	4.18171	1	23	2.01702	1	3.3665	0	?	47	2.09488	14	2.91046	0	?
13	72419615	72552957	13q22.1	85	15	2.85357	0	?	15	70	2.07513	7	133343	0.0408624	4.18171	1	23	2.02547	1	3.3665	0	?	47	2.09943	14	2.81694	0	?
13	72840335	72897329	13q22.1	85	15	2.85357	0	?	15	70	2.075	11	56995	0.0408624	4.18171	1	23	2.02547	1	3.3665	0	?	47	2.09924	14	2.81694	0	?
20	47790152	47871478	20q13.13	85	18	2.72469	1	1.14531	19	66	2.12638	17	81327	0.041024	6.3872	2	23	2.04774	1	2.65918	0	?	43	2.16844	17	2.72855	1	1.14531
18	24514636	24744901	18q12.1	86	1	2.63035	15	1.18897	16	70	1.85052	6	230266	0.0412039	6.37844	2	22	1.97215	1	2.63035	1	1.33072	48	1.79477	0	?	14	1.17884
18	25348255	25665047	18q12.1	86	1	2.63035	15	1.18451	16	70	1.84413	21	316793	0.0412039	6.37844	2	22	1.95473	1	2.63035	1	1.33072	48	1.79344	0	?	14	1.17406
18	26226670	26349571	18q12.1	86	1	2.63035	15	1.25462	16	70	1.84821	17	122902	0.0412039	6.37844	2	22	1.96966	1	2.63035	1	1.33072	48	1.79254	0	?	14	1.24918
20	52123812	52139584	20q13.2	86	20	2.75384	0	?	20	66	2.12542	4	15773	0.0415465	4.15358	1	22	2.06624	2	2.93696	0	?	44	2.15502	18	2.7335	0	?
20	52989337	53591986	20q13.2	86	20	2.85482	0	?	20	66	2.13223	57	602650	0.0415465	4.15358	1	22	2.04071	2	2.93696	0	?	44	2.17799	18	2.8457	0	?
20	53886525	53938419	20q13.2	86	20	2.82276	0	?	20	66	2.13701	11	51895	0.0415465	4.15358	1	22	2.06887	2	2.93696	0	?	44	2.17108	18	2.81007	0	?
18	13175264	13528453	18p11.21	85	3	2.86355	10	1.29857	13	72	1.88898	54	353190	0.0425868	6.31242	2	22	1.99195	2	2.64705	0	?	50	1.84367	1	3.29654	10	1.29857
18	14043280	14084143	18p11.21	85	3	2.86355	10	1.29857	13	72	1.88446	9	40864	0.0425868	6.31242	2	22	1.99195	2	2.64705	0	?	50	1.83716	1	3.29654	10	1.29857
18	14084143	14349174	18p11.21	85	3	2.86355	10	1.29857	13	72	1.87633	20	265032	0.0425868	6.31242	2	22	1.99195	2	2.64705	0	?	50	1.82545	1	3.29654	10	1.29857
18	14709386	14934647	18p11.21	85	3	2.86355	10	1.29857	13	72	1.87475	25	225262	0.0425868	6.31242	2	22	1.99195	2	2.64705	0	?	50	1.82318	1	3.29654	10	1.29857
18	66287163	66331988	18q22.2	84	1	2.97247	15	1.30226	16	68	1.82085	3	44826	0.0426733	6.30836	2	21	1.93936	1	2.97247	1	1.42847	47	1.7679	0	?	14	1.29324
18	8836123	8921446	18p11.22	86	3	2.86355	10	1.28621	13	73	1.88465	10	85324	0.0430336	6.29155	2	22	1.99195	2	2.64705	0	?	51	1.83837	1	3.29654	10	1.28621
18	8921446	9324203	18p11.22	86	3	2.86355	10	1.28621	13	73	1.88809	29	402758	0.0430336	6.29155	2	22	1.99195	2	2.64705	0	?	51	1.84329	1	3.29654	10	1.28621
18	9324203	9423338	18p11.22	86	3	2.86355	10	1.28621	13	73	1.88195	6	99136	0.0430336	6.29155	2	22	1.99195	2	2.64705	0	?	51	1.8345	1	3.29654	10	1.28621
18	12185204	12377491	18p11.21	86	3	2.86355	10	1.29857	13	73	1.88464	24	192288	0.0430336	6.29155	2	22	1.99195	2	2.64705	0	?	51	1.83834	1	3.29654	10	1.29857
18	12377491	13115532	18p11.21	86	3	2.86355	10	1.29857	13	73	1.88845	108	738042	0.0430336	6.29155	2	22	1.99195	2	2.64705	0	?	51	1.8438	1	3.29654	10	1.29857
18	13115532	13175264	18p11.21	86	3	2.86355	10	1.29857	13	73	1.89075	6	59733	0.0430336	6.29155	2	22	1.99195	2	2.64705	0	?	51	1.8471	1	3.29654	10	1.29857
18	13528453	13745010	18p11.21	86	3	2.86355	10	1.29857	13	73	1.89067	28	216558	0.0430336	6.29155	2	22	1.99195	2	2.64705	0	?	51	1.84697	1	3.29654	10	1.29857
18	13745010	14043280	18p11.21	86	3	2.86355	10	1.29857	13	73	1.88785	47	298271	0.0430336	6.29155	2	22	1.99195	2	2.64705	0	?	51	1.84294	1	3.29654	10	1.29857
18	14349174	14709386	18p11.21	86	3	2.86355	10	1.29857	13	73	1.87485	28	360213	0.0430336	6.29155	2	22	1.99195	2	2.64705	0	?	51	1.82433	1	3.29654	10	1.29857
18	14934647	14985516	18p11.21	86	3	2.86355	10	1.29857	13	73	1.87453	7	50870	0.0430336	6.29155	2	22	1.99195	2	2.64705	0	?	51	1.82388	1	3.29654	10	1.29857
13	53038077	53061839	13q21.1	86	15	2.8849	0	?	15	71	2.07842	3	23763	0.0435417	4.07424	1	23	2.03388	1	3.3665	0	?	48	2.09976	14	2.8505	0	?
13	53061839	53783804	13q21.1	86	15	2.926	0	?	15	71	2.07842	62	721966	0.0435417	4.07424	1	23	2.03388	1	3.3665	0	?	48	2.09976	14	2.89453	0	?
13	53783804	53863971	13q21.1	86	15	2.926	0	?	15	71	2.0745	7	80168	0.0435417	4.07424	1	23	2.0218	1	3.3665	0	?	48	2.09976	14	2.89453	0	?
13	71089529	71334850	13q21.33	86	15	2.94086	0	?	15	71	2.07124	52	245322	0.0435417	4.07424	1	23	2.01702	1	3.3665	0	?	48	2.09722	14	2.91046	0	?
13	71334850	71398337	13q21.33	86	15	2.86925	0	?	15	71	2.07124	9	63488	0.0435417	4.07424	1	23	2.01702	1	3.3665	0	?	48	2.09722	14	2.83373	0	?
13	72305268	72419615	13q22.1	86	15	2.85357	0	?	15	71	2.07398	3	114348	0.0435417	4.07424	1	23	2.02547	1	3.3665	0	?	48	2.09722	14	2.81694	0	?
13	72897329	73126000	13q22.1	86	15	2.85357	0	?	15	71	2.07388	19	228672	0.0435417	4.07424	1	23	2.02547	1	3.3665	0	?	48	2.09707	14	2.81694	0	?
20	57487233	57530595	20q13.32	86	15	2.7452	0	?	15	71	2.13481	8	43363	0.0435417	4.07424	1	23	2.05153	1	2.65918	0	?	48	2.17472	14	2.75134	0	?
18	15048898	15179023	18p11.21	85	3	2.86355	10	1.26553	13	72	1.86785	8	130126	0.0437991	6.25628	2	21	1.97515	2	2.64705	0	?	51	1.82366	1	3.29654	10	1.26553
18	36361511	36587297	18q12.3	85	1	3.49704	15	1.28372	16	69	1.83409	11	225787	0.0438394	6.25445	2	21	1.96017	1	3.49704	1	1.42847	48	1.77893	0	?	14	1.27338
20	47871478	49043644	20q13.13	86	18	2.72469	1	1.14531	19	67	2.13101	168	1172167	0.0443795	6.22995	2	23	2.04774	1	2.65918	0	?	44	2.17455	17	2.72855	1	1.14531
13	20355728	20495851	13q12.11	85	9	2.74151	0	?	9	76	2.1051	19	140124	0.0465851	3.96031	1	24	2.06553	0	?	0	?	52	2.12337	9	2.74151	0	?
17	5153396	5339829	17p13.2	85	0	?	9	1.29321	9	76	1.87894	14	186434	0.0465851	3.96031	1	24	1.98839	0	?	0	?	52	1.82842	0	?	9	1.29321
18	5524522	5623864	18p11.31	85	4	2.78229	12	1.31171	16	69	1.88415	12	99343	0.047128	6.10977	2	22	1.9945	2	2.64705	0	?	47	1.8325	2	2.91754	12	1.31171
18	6064591	6484014	18p11.31	85	4	2.78229	12	1.31171	16	69	1.88504	39	419424	0.047128	6.10977	2	22	1.99195	2	2.64705	0	?	47	1.83499	2	2.91754	12	1.31171
20	53617641	53784038	20q13.2	84	19	2.85629	0	?	19	65	2.13268	27	166398	0.0477793	3.91773	1	22	2.04071	2	2.93696	0	?	43	2.17973	17	2.8468	0	?
13	19857036	19885929	13q12.11	86	9	2.7612	0	?	9	77	2.10204	5	28894	0.0485433	3.89108	1	24	2.06553	0	?	0	?	53	2.11857	9	2.7612	0	?
13	20122297	20355728	13q12.11	86	9	2.74151	0	?	9	77	2.10381	32	233432	0.0485433	3.89108	1	24	2.06553	0	?	0	?	53	2.12115	9	2.74151	0	?
13	20495851	21156030	13q12.11	86	9	2.74151	0	?	9	77	2.10374	98	660180	0.0485433	3.89108	1	24	2.06553	0	?	0	?	53	2.12104	9	2.74151	0	?
13	21156030	21599925	13q12.11	86	9	2.74151	0	?	9	77	2.09884	80	443896	0.0485433	3.89108	1	24	2.06553	0	?	0	?	53	2.11392	9	2.74151	0	?
13	45018498	45170656	13q14.12	86	9	2.70882	0	?	9	77	2.1094	14	152159	0.0485433	3.89108	1	24	2.0837	0	?	0	?	53	2.12104	9	2.70882	0	?
13	45170656	45701403	13q14.12	86	9	2.70882	0	?	9	77	2.10264	62	530748	0.0485433	3.89108	1	24	2.0837	0	?	0	?	53	2.11122	9	2.70882	0	?
18	5259909	5478069	18p11.31	86	4	2.78229	12	1.31171	16	70	1.88877	19	218161	0.0486287	6.04708	2	22	1.9945	2	2.64705	0	?	48	1.8403	2	2.91754	12	1.31171
18	5478069	5524522	18p11.31	86	4	2.78229	12	1.31171	16	70	1.88582	4	46454	0.0486287	6.04708	2	22	1.9945	2	2.64705	0	?	48	1.83601	2	2.91754	12	1.31171
18	5623864	5816569	18p11.31	86	4	2.78229	12	1.31171	16	70	1.88517	29	192706	0.0486287	6.04708	2	22	1.9945	2	2.64705	0	?	48	1.83507	2	2.91754	12	1.31171
18	5925201	6064591	18p11.31	86	4	2.78229	12	1.31171	16	70	1.88437	23	139391	0.0486287	6.04708	2	22	1.99195	2	2.64705	0	?	48	1.83507	2	2.91754	12	1.31171
18	6484014	6885108	18p11.31	86	4	2.78229	12	1.31171	16	70	1.88005	58	401095	0.0486287	6.04708	2	22	1.99195	2	2.64705	0	?	48	1.82876	2	2.91754	12	1.31171
18	7075806	7677332	18p11.31 - 18p11.23	86	4	2.78229	12	1.30858	16	70	1.88005	81	601527	0.0486287	6.04708	2	22	1.99195	2	2.64705	0	?	48	1.82876	2	2.91754	12	1.30858
