# Supplementary material for: A Genome-Wide Study of Cytogenetic Changes in Colorectal Cancer Using SNP Microarrays: Opportunities for Future Personalized Treatment
Source: PLoS One. 2012 Feb 20;7(2):e31968. doi: 10.1371/journal.pone.0031968 (PMC3282791; doi:10.1371/journal.pone.0031968)
Supplement: Table S2 — Association of CN changes with histological diagnosis. (CSV) [file pone.0031968.s003.csv]

Chromosome	Start	Stop	cytoband	Total Number of Samples	Total Amplifications	Amplification Average Copy Number	Total Deletions	Deletion Average Copy Number	Total Aberrations	Total Unchanged	Unchanged Average Copy Number	# markers	length (bps)	p-value(Histopathological diagnosis)	chisq(Histopathological diagnosis)	df(Histopathological diagnosis)	# Samples Unchanged Histopathological diagnosis = Adenocarcinoma	Average Copy Number Unchanged Histopathological diagnosis = Adenocarcinoma	# Samples Amplified Histopathological diagnosis = Adenocarcinoma	Average Copy Number Amplified Histopathological diagnosis = Adenocarcinoma	# Samples Deleted Histopathological diagnosis = Adenocarcinoma	Average Copy Number Deleted Histopathological diagnosis = Adenocarcinoma	# Samples Unchanged Histopathological diagnosis = Mucinous adenocarcinoma	Average Copy Number Unchanged Histopathological diagnosis = Mucinous adenocarcinoma	# Samples Amplified Histopathological diagnosis = Mucinous adenocarcinoma	Average Copy Number Amplified Histopathological diagnosis = Mucinous adenocarcinoma	# Samples Deleted Histopathological diagnosis = Mucinous adenocarcinoma	Average Copy Number Deleted Histopathological diagnosis = Mucinous adenocarcinoma
18	26492429	26751322	18q12.1	62	1	2.54523	13	1.24913	14	48	1.78859	15	258894	0.0122989	8.79649	2	41	1.78679	0	?	13	1.24913	7	1.79911	1	2.54523	0	?
18	20379336	20437299	18q11.2	62	1	2.69327	11	1.22801	12	50	1.81443	13	57964	0.0147491	8.43315	2	43	1.81575	0	?	11	1.22801	7	1.80632	1	2.69327	0	?
18	20437299	20510485	18q11.2	62	1	2.69327	11	1.18669	12	50	1.81443	14	73187	0.0147491	8.43315	2	43	1.81575	0	?	11	1.18669	7	1.80632	1	2.69327	0	?
18	20510485	21408696	18q11.2	62	1	2.69327	11	1.18669	12	50	1.80057	144	898212	0.0147491	8.43315	2	43	1.79963	0	?	11	1.18669	7	1.80632	1	2.69327	0	?
18	19849826	19970318	18q11.2	62	1	2.69327	10	1.2252	11	51	1.82324	18	120493	0.0160655	8.26216	2	44	1.82593	0	?	10	1.2252	7	1.80632	1	2.69327	0	?
18	19970318	20379336	18q11.2	62	1	2.69327	10	1.2252	11	51	1.81847	67	409019	0.0160655	8.26216	2	44	1.8204	0	?	10	1.2252	7	1.80632	1	2.69327	0	?
18	19676370	19757157	18q11.2	62	1	2.69327	9	1.20567	10	52	1.8138	14	80788	0.0174419	8.09776	2	45	1.81496	0	?	9	1.20567	7	1.80632	1	2.69327	0	?
18	19757157	19849826	18q11.2	62	1	2.69327	9	1.20567	10	52	1.82156	14	92670	0.0174419	8.09776	2	45	1.82393	0	?	9	1.20567	7	1.80632	1	2.69327	0	?
15	41430990	42669963	15q15.3	62	1	2.56877	6	1.30643	7	55	1.88143	14	1238974	0.0219234	7.6404	2	48	1.8788	0	?	6	1.30643	7	1.89949	1	2.56877	0	?
15	43155043	43525130	15q21.1	62	1	2.56877	6	1.31343	7	55	1.89892	54	370088	0.0219234	7.6404	2	48	1.89884	0	?	6	1.31343	7	1.89949	1	2.56877	0	?
15	43525130	43793564	15q21.1	62	1	2.56877	6	1.31343	7	55	1.88927	43	268435	0.0219234	7.6404	2	48	1.88777	0	?	6	1.31343	7	1.89949	1	2.56877	0	?
15	40507477	41430990	15q15.1 - 15q15.3	62	1	2.56877	5	1.32998	6	56	1.88384	23	923514	0.0235314	7.49884	2	49	1.8816	0	?	5	1.32998	7	1.89949	1	2.56877	0	?
15	43799960	43974086	15q21.1	62	1	2.56877	5	1.29014	6	56	1.89684	27	174127	0.0235314	7.49884	2	49	1.89646	0	?	5	1.29014	7	1.89949	1	2.56877	0	?
15	43974086	44806618	15q21.1	62	1	2.56877	5	1.35408	6	56	1.89684	135	832533	0.0235314	7.49884	2	49	1.89646	0	?	5	1.35408	7	1.89949	1	2.56877	0	?
15	42669963	42839093	15q15.3 - 15q21.1	61	1	2.56877	5	1.29688	6	55	1.88143	11	169131	0.0248852	7.38696	2	48	1.8788	0	?	5	1.29688	7	1.89949	1	2.56877	0	?
15	42839093	43093807	15q21.1	61	1	2.56877	5	1.29688	6	55	1.8881	11	254715	0.0248852	7.38696	2	48	1.88644	0	?	5	1.29688	7	1.89949	1	2.56877	0	?
15	43093807	43155043	15q21.1	61	1	2.56877	5	1.29688	6	55	1.89892	3	61237	0.0248852	7.38696	2	48	1.89884	0	?	5	1.29688	7	1.89949	1	2.56877	0	?
