# Supplementary material for: A Genome-Wide Study of Cytogenetic Changes in Colorectal Cancer Using SNP Microarrays: Opportunities for Future Personalized Treatment
Source: PLoS One. 2012 Feb 20;7(2):e31968. doi: 10.1371/journal.pone.0031968 (PMC3282791; doi:10.1371/journal.pone.0031968)
Supplement: Table S3 — Association of CN changes with tumor location. (CSV) [file pone.0031968.s004.csv]

Chromosome	Start	Stop	cytoband	Total Number of Samples	Total Amplifications	Amplification Average Copy Number	Total Deletions	Deletion Average Copy Number	Total Aberrations	Total Unchanged	Unchanged Average Copy Number	# markers	length (bps)	p-value(Location)	chisq(Location)	df(Location)	# Samples Unchanged Location = Left	Average Copy Number Unchanged Location = Left	# Samples Amplified Location = Left	Average Copy Number Amplified Location = Left	# Samples Deleted Location = Left	Average Copy Number Deleted Location = Left	# Samples Unchanged Location = Right	Average Copy Number Unchanged Location = Right	# Samples Amplified Location = Right	Average Copy Number Amplified Location = Right	# Samples Deleted Location = Right	Average Copy Number Deleted Location = Right
13	113119531	113218570	13q34	62	7	2.80198	1	1.4235	8	54	2.07872	18	99040	0.0203718	7.78721	2	47	2.09501	7	2.80198	0	?	7	1.96941	0	?	1	1.4235
13	112108570	112257950	13q34	62	6	2.81332	1	1.4235	7	55	2.08277	26	149381	0.0219234	7.6404	2	48	2.09426	6	2.81332	0	?	7	2.00396	0	?	1	1.4235
13	112257950	112664600	13q34	62	6	2.81332	1	1.4235	7	55	2.08661	59	406651	0.0219234	7.6404	2	48	2.09866	6	2.81332	0	?	7	2.00396	0	?	1	1.4235
13	112664600	113119531	13q34	62	6	2.81332	1	1.4235	7	55	2.08221	69	454932	0.0219234	7.6404	2	48	2.09866	6	2.81332	0	?	7	1.96941	0	?	1	1.4235
12	17556989	17746704	12p12.3	62	5	3.00436	1	1.20865	6	56	1.96016	23	189716	0.0235314	7.49884	2	49	1.96388	5	3.00436	0	?	7	1.93408	0	?	1	1.20865
12	17420914	17556989	12p12.3	61	5	3.00436	1	1.20865	6	55	1.96301	18	136076	0.0248852	7.38696	2	48	1.96723	5	3.00436	0	?	7	1.93408	0	?	1	1.20865
20	50114448	50345731	20q13.2	62	20	2.7231	0	?	20	42	2.16087	27	231284	0.0364934	4.3739	1	34	2.17888	20	2.7231	0	?	8	2.08433	0	?	0	?
20	49882248	50114448	20q13.2	61	19	2.73154	0	?	19	42	2.16087	39	232201	0.0412596	4.16532	1	34	2.17888	19	2.73154	0	?	8	2.08433	0	?	0	?
20	51414975	51563046	20q13.2	61	19	2.73992	0	?	19	42	2.15718	25	148072	0.0412596	4.16532	1	34	2.17432	19	2.73992	0	?	8	2.08433	0	?	0	?
20	52749891	52777204	20q13.2	61	19	2.79628	0	?	19	42	2.17959	3	27314	0.0412596	4.16532	1	34	2.202	19	2.79628	0	?	8	2.08433	0	?	0	?
20	52777204	52868000	20q13.2	61	19	2.83128	0	?	19	42	2.17959	12	90797	0.0412596	4.16532	1	34	2.202	19	2.83128	0	?	8	2.08433	0	?	0	?
20	50345731	50986260	20q13.2	62	19	2.73222	0	?	19	43	2.15661	91	640530	0.0439477	4.05857	1	35	2.17313	19	2.73222	0	?	8	2.08433	0	?	0	?
20	51135837	51414975	20q13.2	62	19	2.73992	0	?	19	43	2.15661	49	279139	0.0439477	4.05857	1	35	2.17313	19	2.73992	0	?	8	2.08433	0	?	0	?
20	51563046	51583227	20q13.2	62	19	2.73992	0	?	19	43	2.15629	4	20182	0.0439477	4.05857	1	35	2.17274	19	2.73992	0	?	8	2.08433	0	?	0	?
20	52723303	52749891	20q13.2	62	19	2.79628	0	?	19	43	2.16679	5	26589	0.0439477	4.05857	1	35	2.18564	19	2.79628	0	?	8	2.08433	0	?	0	?
20	41063511	41234903	20q12 - 20q13.11	61	18	2.7283	0	?	18	43	2.16658	27	171393	0.049618	3.85432	1	35	2.18538	18	2.7283	0	?	8	2.08433	0	?	0	?
20	49826093	49882248	20q13.2	61	18	2.74261	0	?	18	43	2.16407	8	56156	0.049618	3.85432	1	35	2.1823	18	2.74261	0	?	8	2.08433	0	?	0	?
20	50986260	51135837	20q13.2	61	18	2.74164	0	?	18	43	2.15661	26	149578	0.049618	3.85432	1	35	2.17313	18	2.74164	0	?	8	2.08433	0	?	0	?
20	52139584	52374773	20q13.2	61	18	2.78115	0	?	18	43	2.15588	46	235190	0.049618	3.85432	1	35	2.17224	18	2.78115	0	?	8	2.08433	0	?	0	?
20	52374773	52723303	20q13.2	61	18	2.78115	0	?	18	43	2.16679	37	348531	0.049618	3.85432	1	35	2.18564	18	2.78115	0	?	8	2.08433	0	?	0	?
20	52868000	52989337	20q13.2	61	18	2.8457	0	?	18	43	2.18165	15	121338	0.049618	3.85432	1	35	2.20389	18	2.8457	0	?	8	2.08433	0	?	0	?
20	53591986	53617641	20q13.2	61	18	2.8457	0	?	18	43	2.17973	6	25656	0.049618	3.85432	1	35	2.20154	18	2.8457	0	?	8	2.08433	0	?	0	?
20	53784038	53855607	20q13.2	61	18	2.84495	0	?	18	43	2.17973	13	71570	0.049618	3.85432	1	35	2.20154	18	2.84495	0	?	8	2.08433	0	?	0	?
20	53855607	53880746	20q13.2	61	18	2.81007	0	?	18	43	2.17973	3	25140	0.049618	3.85432	1	35	2.20154	18	2.81007	0	?	8	2.08433	0	?	0	?
