# Supplementary material for: A Genome-Wide Study of Cytogenetic Changes in Colorectal Cancer Using SNP Microarrays: Opportunities for Future Personalized Treatment
Source: PLoS One. 2012 Feb 20;7(2):e31968. doi: 10.1371/journal.pone.0031968 (PMC3282791; doi:10.1371/journal.pone.0031968)
Supplement: Table S4 — Association of CN changes with tumor grade. (CSV) [file pone.0031968.s005.csv]

Chromosome	Start	Stop	cytoband	Total Number of Samples	Total Amplifications	Amplification Average Copy Number	Total Deletions	Deletion Average Copy Number	Total Aberrations	Total Unchanged	Unchanged Average Copy Number	# markers	length (bps)	p-value(Grade)	chisq(Grade)	df(Grade)	# Samples Unchanged Grade = High_Grade	Average Copy Number Unchanged Grade = High_Grade	# Samples Amplified Grade = High_Grade	Average Copy Number Amplified Grade = High_Grade	# Samples Deleted Grade = High_Grade	Average Copy Number Deleted Grade = High_Grade	# Samples Unchanged Grade = Low_Grade	Average Copy Number Unchanged Grade = Low_Grade	# Samples Amplified Grade = Low_Grade	Average Copy Number Amplified Grade = Low_Grade	# Samples Deleted Grade = Low_Grade	Average Copy Number Deleted Grade = Low_Grade
18	20379336	20437299	18q11.2	62	1	2.69327	11	1.22801	12	50	1.81443	13	57964	0.0297359	7.0308	2	11	1.78972	1	2.69327	0	?	39	1.82139	0	?	11	1.22801
18	20437299	20510485	18q11.2	62	1	2.69327	11	1.18669	12	50	1.81443	14	73187	0.0297359	7.0308	2	11	1.78972	1	2.69327	0	?	39	1.82139	0	?	11	1.18669
18	20510485	21408696	18q11.2	62	1	2.69327	11	1.18669	12	50	1.80057	144	898212	0.0297359	7.0308	2	11	1.78972	1	2.69327	0	?	39	1.80363	0	?	11	1.18669
18	19849826	19970318	18q11.2	62	1	2.69327	10	1.2252	11	51	1.82324	18	120493	0.0346174	6.7268	2	11	1.78972	1	2.69327	0	?	40	1.83245	0	?	10	1.2252
18	19970318	20379336	18q11.2	62	1	2.69327	10	1.2252	11	51	1.81847	67	409019	0.0346174	6.7268	2	11	1.78972	1	2.69327	0	?	40	1.82638	0	?	10	1.2252
18	50484437	50926271	18q21.2	61	0	?	15	1.24784	15	46	1.77283	25	441835	0.0364466	4.37609	1	11	1.77879	0	?	0	?	35	1.77096	0	?	15	1.24784
18	19676370	19757157	18q11.2	62	1	2.69327	9	1.20567	10	52	1.8138	14	80788	0.0400653	6.43449	2	11	1.78972	1	2.69327	0	?	41	1.82026	0	?	9	1.20567
18	19757157	19849826	18q11.2	62	1	2.69327	9	1.20567	10	52	1.82156	14	92670	0.0400653	6.43449	2	11	1.78972	1	2.69327	0	?	41	1.8301	0	?	9	1.20567
