# Supplementary material for: A Genome-Wide Study of Cytogenetic Changes in Colorectal Cancer Using SNP Microarrays: Opportunities for Future Personalized Treatment
Source: PLoS One. 2012 Feb 20;7(2):e31968. doi: 10.1371/journal.pone.0031968 (PMC3282791; doi:10.1371/journal.pone.0031968)
Supplement: Table S5 — Association of CN changes with tumor stage. (CSV) [file pone.0031968.s006.csv]

Chromosome	Start	Stop	cytoband	Total Number of Samples	Total Amplifications	Amplification Average Copy Number	Total Deletions	Deletion Average Copy Number	Total Aberrations	Total Unchanged	Unchanged Average Copy Number	# markers	length (bps)	p-value(Stage)	chisq(Stage)	df(Stage)	# Samples Unchanged Stage = Stage1	Average Copy Number Unchanged Stage = Stage1	# Samples Amplified Stage = Stage1	Average Copy Number Amplified Stage = Stage1	# Samples Deleted Stage = Stage1	Average Copy Number Deleted Stage = Stage1	# Samples Unchanged Stage = Stage2	Average Copy Number Unchanged Stage = Stage2	# Samples Amplified Stage = Stage2	Average Copy Number Amplified Stage = Stage2	# Samples Deleted Stage = Stage2	Average Copy Number Deleted Stage = Stage2	# Samples Unchanged Stage = Stage3	Average Copy Number Unchanged Stage = Stage3	# Samples Amplified Stage = Stage3	Average Copy Number Amplified Stage = Stage3	# Samples Deleted Stage = Stage3	Average Copy Number Deleted Stage = Stage3
1	29342734	29503339	1p35.3	62	0	?	6	1.31746	6	56	1.88311	11	160606	5.31E-05	19.6851	2	6	1.88242	0	?	5	1.28987	16	1.87285	0	?	0	?	34	1.88806	0	?	1	1.45538
1	29506600	30734102	1p35.3 - 1p35.2	62	0	?	6	1.31293	6	56	1.88311	220	1227503	5.31E-05	19.6851	2	6	1.88242	0	?	5	1.28444	16	1.87285	0	?	0	?	34	1.88806	0	?	1	1.45538
5	42565985	42837911	5p12	61	8	2.77351	0	?	8	53	1.99509	43	271927	0.000128477	17.9195	2	10	1.98519	0	?	0	?	9	2.01915	7	2.80667	0	?	34	1.99163	1	2.54142	0	?
1	25487471	25969062	1p36.11	61	0	?	7	1.36615	7	54	1.89732	40	481592	0.000134533	17.8274	2	5	1.92766	0	?	5	1.32272	16	1.87285	0	?	0	?	33	1.90459	0	?	2	1.47473
1	23378689	23960101	1p36.12 - 1p36.11	62	0	?	7	1.36615	7	55	1.89717	70	581413	0.00034533	15.942	2	6	1.89198	0	?	5	1.32272	16	1.87285	0	?	0	?	33	1.90991	0	?	2	1.47473
1	23960101	25209597	1p36.11	62	0	?	7	1.36615	7	55	1.89398	144	1249497	0.00034533	15.942	2	6	1.89198	0	?	5	1.32272	16	1.87285	0	?	0	?	33	1.90459	0	?	2	1.47473
1	25209597	25487471	1p36.11	62	0	?	7	1.36615	7	55	1.89711	46	277875	0.00034533	15.942	2	6	1.92067	0	?	5	1.32272	16	1.87285	0	?	0	?	33	1.90459	0	?	2	1.47473
1	25969062	26088525	1p36.11	62	0	?	7	1.36615	7	55	1.89753	18	119464	0.00034533	15.942	2	6	1.92453	0	?	5	1.32272	16	1.87285	0	?	0	?	33	1.90459	0	?	2	1.47473
1	26088525	27883897	1p36.11 - 1p35.3	62	0	?	7	1.36615	7	55	1.88846	222	1795373	0.00034533	15.942	2	6	1.92453	0	?	5	1.32272	16	1.87285	0	?	0	?	33	1.88947	0	?	2	1.47473
1	27883897	27953523	1p35.3	62	0	?	7	1.34269	7	55	1.88846	4	69627	0.00034533	15.942	2	6	1.92453	0	?	5	1.28987	16	1.87285	0	?	0	?	33	1.88947	0	?	2	1.47473
1	27953523	29342734	1p35.3	62	0	?	7	1.34269	7	55	1.88387	88	1389212	0.00034533	15.942	2	6	1.88242	0	?	5	1.28987	16	1.87285	0	?	0	?	33	1.88947	0	?	2	1.47473
5	42527704	42565985	5p12	61	7	2.74381	0	?	7	54	1.99789	7	38282	0.000702175	14.5227	2	10	1.98519	0	?	0	?	10	2.03187	6	2.77754	0	?	34	1.99163	1	2.54142	0	?
5	42837911	43017173	5p12	61	7	2.80417	0	?	7	54	2.00035	30	179263	0.000702175	14.5227	2	10	1.98519	0	?	0	?	10	2.04517	6	2.84796	0	?	34	1.99163	1	2.54142	0	?
5	45300865	45583617	5p12	61	7	2.97607	0	?	7	54	2.003	33	282753	0.000702175	14.5227	2	10	2.02406	0	?	0	?	10	2.03429	6	3.04852	0	?	34	1.98761	1	2.54142	0	?
1	23221546	23378689	1p36.12	62	0	?	8	1.34777	8	54	1.89839	15	157144	0.00127733	13.326	2	6	1.89198	0	?	5	1.32272	16	1.87285	0	?	0	?	32	1.91236	0	?	3	1.38952
5	36842185	37012983	5p13.2	61	6	2.81211	0	?	6	55	2.00997	25	170799	0.00196891	12.4605	2	11	2.03021	0	?	0	?	10	2.03187	5	2.86625	0	?	34	1.99698	1	2.54142	0	?
5	39170969	39869487	5p13.1	62	8	2.77674	0	?	8	54	2.00119	93	698519	0.0026074	11.8988	2	10	1.98483	1	2.78236	0	?	10	2.03187	6	2.81502	0	?	34	1.99698	1	2.54142	0	?
5	39869487	40224720	5p13.1	62	8	2.77674	0	?	8	54	1.9982	45	355234	0.0026074	11.8988	2	10	1.98483	1	2.78236	0	?	10	2.03187	6	2.81502	0	?	34	1.99223	1	2.54142	0	?
5	40356339	41108743	5p13.1	62	8	2.77674	0	?	8	54	1.99853	90	752405	0.0026074	11.8988	2	10	1.98483	1	2.78236	0	?	10	2.03187	6	2.81502	0	?	34	1.99275	1	2.54142	0	?
5	41108743	41837910	5p13.1	62	8	2.83521	0	?	8	54	1.99853	89	729168	0.0026074	11.8988	2	10	1.98483	1	2.78236	0	?	10	2.03187	6	2.89298	0	?	34	1.99275	1	2.54142	0	?
5	42466856	42527704	5p12	62	8	2.74863	0	?	8	54	1.99789	9	60849	0.0026074	11.8988	2	10	1.98519	1	2.78236	0	?	10	2.03187	6	2.77754	0	?	34	1.99163	1	2.54142	0	?
5	43481791	43646446	5p12	62	8	2.89833	0	?	8	54	1.99187	24	164656	0.0026074	11.8988	2	10	1.93938	1	2.59743	0	?	10	2.04517	6	3.00796	0	?	34	1.99163	1	2.54142	0	?
5	43646446	43878250	5p12	62	8	2.89833	0	?	8	54	2.00755	32	231805	0.0026074	11.8988	2	10	2.02406	1	2.59743	0	?	10	2.04517	6	3.00796	0	?	34	1.99163	1	2.54142	0	?
5	43878250	43895510	5p12	62	8	2.98232	0	?	8	54	2.00755	3	17261	0.0026074	11.8988	2	10	2.02406	1	2.59743	0	?	10	2.04517	6	3.11996	0	?	34	1.99163	1	2.54142	0	?
5	43900049	44977576	5p12	62	8	2.92874	0	?	8	54	2.00553	164	1077528	0.0026074	11.8988	2	10	2.02406	1	2.59743	0	?	10	2.03429	6	3.04852	0	?	34	1.99163	1	2.54142	0	?
5	44977576	45300865	5p12	62	8	2.92874	0	?	8	54	2.003	36	323290	0.0026074	11.8988	2	10	2.02406	1	2.59743	0	?	10	2.03429	6	3.04852	0	?	34	1.98761	1	2.54142	0	?
5	45583617	45768616	5p12	62	8	2.92836	0	?	8	54	2.00065	28	185000	0.0026074	11.8988	2	10	2.02406	1	2.59433	0	?	10	2.02158	6	3.04852	0	?	34	1.98761	1	2.54142	0	?
5	45768616	45791770	5p12	62	8	2.92836	0	?	8	54	1.99717	4	23155	0.0026074	11.8988	2	10	2.02406	1	2.59433	0	?	10	2.00283	6	3.04852	0	?	34	1.98761	1	2.54142	0	?
5	41837910	42008986	5p13.1	61	8	2.83521	0	?	8	53	1.99967	28	171077	0.00292831	11.6667	2	9	1.99001	1	2.78236	0	?	10	2.03187	6	2.89298	0	?	34	1.99275	1	2.54142	0	?
5	40224720	40356339	5p13.1	61	8	2.77674	0	?	8	53	2.00545	24	131620	0.00303626	11.5943	2	10	1.98483	1	2.78236	0	?	10	2.03187	6	2.81502	0	?	33	2.0037	1	2.54142	0	?
5	42325894	42443196	5p13.1 - 5p12	61	8	2.83521	0	?	8	53	1.99415	5	117303	0.00303626	11.5943	2	10	1.98519	1	2.78236	0	?	10	2.03187	6	2.89298	0	?	33	1.98544	1	2.54142	0	?
5	42443196	42466856	5p12	61	8	2.74863	0	?	8	53	1.99415	4	23661	0.00303626	11.5943	2	10	1.98519	1	2.78236	0	?	10	2.03187	6	2.77754	0	?	33	1.98544	1	2.54142	0	?
5	35959871	36842185	5p13.2	62	6	2.81211	0	?	6	56	2.01658	153	882315	0.00308909	11.5598	2	11	2.03021	0	?	0	?	11	2.06352	5	2.86625	0	?	34	1.99698	1	2.54142	0	?
5	37012983	37898127	5p13.2	62	6	2.81211	0	?	6	56	2.01684	73	885145	0.00308909	11.5598	2	11	2.03021	0	?	0	?	11	2.06484	5	2.86625	0	?	34	1.99698	1	2.54142	0	?
5	37898127	38971185	5p13.2 - 5p13.1	62	6	2.81211	0	?	6	56	2.0112	174	1073059	0.00308909	11.5598	2	11	2.0015	0	?	0	?	11	2.06484	5	2.86625	0	?	34	1.99698	1	2.54142	0	?
5	42008986	42325894	5p13.1	60	8	2.83521	0	?	8	52	1.99516	18	316909	0.00341306	11.3603	2	9	1.99001	1	2.78236	0	?	10	2.03187	6	2.89298	0	?	33	1.98544	1	2.54142	0	?
5	35824275	35959871	5p13.2	61	6	2.81211	0	?	6	55	2.00808	25	135597	0.00354224	11.286	2	10	1.98483	0	?	0	?	11	2.06352	5	2.86625	0	?	34	1.99698	1	2.54142	0	?
1	8612752	8941715	1p36.23	61	0	?	6	1.41163	6	55	1.90249	31	328964	0.00394006	11.0731	2	7	1.93519	0	?	4	1.38008	16	1.87254	0	?	0	?	32	1.91031	0	?	2	1.47473
1	9500110	9618528	1p36.22	61	0	?	6	1.41163	6	55	1.89502	20	118419	0.00394006	11.0731	2	7	1.87648	0	?	4	1.38008	16	1.87254	0	?	0	?	32	1.91031	0	?	2	1.47473
1	10256886	10491615	1p36.22	61	0	?	6	1.41194	6	55	1.90322	39	234730	0.00394006	11.0731	2	7	1.94093	0	?	4	1.38055	16	1.87254	0	?	0	?	32	1.91031	0	?	2	1.47473
1	20901702	20920151	1p36.12	61	0	?	6	1.40768	6	55	1.8998	4	18450	0.00394006	11.0731	2	7	1.89035	0	?	4	1.37416	16	1.87254	0	?	0	?	32	1.91549	0	?	2	1.47473
9	75378879	76209623	9q21.13	62	6	2.85535	0	?	6	56	1.97944	108	830745	0.00400638	11.0397	2	7	1.93016	4	2.84525	0	?	15	1.96872	1	3.23024	0	?	34	1.99431	1	2.52088	0	?
20	59945675	59988404	20q13.33	62	13	2.73677	1	1.37717	14	48	2.18294	4	42730	0.00450786	15.0952	4	4	2.25371	6	2.75641	1	1.37717	13	2.15615	3	2.67131	0	?	31	2.18504	4	2.7564	0	?
20	61018455	61253017	20q13.33	62	13	2.73677	1	1.37717	14	48	2.15928	37	234563	0.00450786	15.0952	4	4	2.25371	6	2.75641	1	1.37717	13	2.1234	3	2.67131	0	?	31	2.16214	4	2.7564	0	?
20	61253017	62064557	20q13.33	62	13	2.73677	1	1.37717	14	48	2.15479	114	811541	0.00450786	15.0952	4	4	2.25371	6	2.75641	1	1.37717	13	2.10681	3	2.67131	0	?	31	2.16214	4	2.7564	0	?
1	20929111	21211065	1p36.12	60	0	?	6	1.40768	6	54	1.9005	25	281955	0.00451175	10.8021	2	7	1.89035	0	?	4	1.37416	15	1.89006	0	?	0	?	32	1.90762	0	?	2	1.47473
20	51629698	52002100	20q13.2	61	17	2.73792	0	?	17	44	2.16103	56	372403	0.00506702	10.57	2	3	2.2448	7	2.74623	0	?	13	2.13624	3	2.67131	0	?	28	2.16357	7	2.75815	0	?
20	52868000	52989337	20q13.2	61	18	2.8457	0	?	18	43	2.18165	15	121338	0.00530452	10.4784	2	3	2.2448	7	2.8926	0	?	11	2.15994	5	2.84781	0	?	29	2.18335	6	2.78921	0	?
20	53984784	54198709	20q13.2	62	16	2.77226	0	?	16	46	2.17679	19	213926	0.00670438	10.01	2	4	2.18875	7	2.801	0	?	13	2.15615	3	2.67131	0	?	29	2.18439	6	2.78921	0	?
5	35687719	35812632	5p13.2	61	7	2.82108	0	?	7	54	2.00787	19	124914	0.00792576	9.67527	2	10	1.98483	1	2.8749	0	?	10	2.06794	5	2.86625	0	?	34	1.99698	1	2.54142	0	?
5	38971185	39170969	5p13.1	61	7	2.80786	0	?	7	54	2.00119	25	199785	0.00792576	9.67527	2	10	1.98483	1	2.78236	0	?	10	2.03187	5	2.86625	0	?	34	1.99698	1	2.54142	0	?
5	43024462	43481791	5p12	61	7	2.73675	0	?	7	54	1.99187	69	457330	0.00792576	9.67527	2	10	1.93938	1	2.59743	0	?	10	2.04517	5	2.80368	0	?	34	1.99163	1	2.54142	0	?
20	6699087	6729461	20p12.3	62	6	2.79773	3	1.24438	9	53	2.06872	5	30375	0.00834045	13.6935	4	7	1.94331	4	2.85707	0	?	13	2.14355	1	2.60725	2	1.14349	33	2.06584	1	2.75087	1	1.44615
20	6729461	6853219	20p12.3	62	6	2.79773	3	1.24438	9	53	2.06145	21	123759	0.00834045	13.6935	4	7	1.94331	4	2.85707	0	?	13	2.14355	1	2.60725	2	1.14349	33	2.05417	1	2.75087	1	1.44615
20	7813746	7865305	20p12.3	62	6	2.79773	3	1.27106	9	53	2.06197	9	51560	0.00834045	13.6935	4	7	1.94331	4	2.85707	0	?	13	2.14565	1	2.60725	2	1.18351	33	2.05417	1	2.75087	1	1.44615
20	59988404	60122145	20q13.33	62	14	2.74628	1	1.37717	15	47	2.18126	5	133742	0.00885004	13.5575	4	4	2.25371	6	2.75641	1	1.37717	13	2.15615	3	2.67131	0	?	30	2.18248	5	2.7791	0	?
20	60122145	60304951	20q13.33	62	14	2.74628	1	1.37717	15	47	2.1722	29	182807	0.00885004	13.5575	4	4	2.25371	6	2.75641	1	1.37717	13	2.1234	3	2.67131	0	?	30	2.18248	5	2.7791	0	?
20	60304951	60392489	20q13.33	62	14	2.74628	1	1.37717	15	47	2.17605	13	87539	0.00885004	13.5575	4	4	2.25371	6	2.75641	1	1.37717	13	2.1234	3	2.67131	0	?	30	2.18851	5	2.7791	0	?
20	60392489	61018455	20q13.33	62	14	2.74628	1	1.37717	15	47	2.16825	84	625967	0.00885004	13.5575	4	4	2.25371	6	2.75641	1	1.37717	13	2.1234	3	2.67131	0	?	30	2.17629	5	2.7791	0	?
20	57906784	58091412	20q13.33	62	13	2.73677	0	?	13	49	2.17649	17	184629	0.00885526	9.45349	2	5	2.13663	6	2.75641	0	?	13	2.15615	3	2.67131	0	?	31	2.19145	4	2.7564	0	?
20	58091412	58382253	20q13.33	62	13	2.73677	0	?	13	49	2.18512	48	290842	0.00885526	9.45349	2	5	2.22119	6	2.75641	0	?	13	2.15615	3	2.67131	0	?	31	2.19145	4	2.7564	0	?
20	58382253	59485436	20q13.33	62	13	2.73677	0	?	13	49	2.1892	209	1103184	0.00885526	9.45349	2	5	2.22119	6	2.75641	0	?	13	2.15615	3	2.67131	0	?	31	2.19789	4	2.7564	0	?
20	59485436	59945675	20q13.33	62	13	2.73677	0	?	13	49	2.18106	76	460240	0.00885526	9.45349	2	5	2.22119	6	2.75641	0	?	13	2.15615	3	2.67131	0	?	31	2.18504	4	2.7564	0	?
20	62064557	62192614	20q13.33	61	12	2.70067	1	1.37717	13	48	2.15479	21	128058	0.00972236	13.3415	4	4	2.25371	5	2.6737	1	1.37717	13	2.10681	3	2.67131	0	?	31	2.16214	4	2.7564	0	?
5	30803912	30863267	5p13.3	62	9	2.9115	0	?	9	53	1.99384	7	59356	0.00976756	9.25738	2	10	1.98483	1	2.64453	0	?	10	2.03336	6	3.08545	0	?	33	1.9846	2	2.52315	0	?
5	30863267	31354704	5p13.3	62	9	2.9115	0	?	9	53	1.99776	96	491438	0.00976756	9.25738	2	10	1.98483	1	2.64453	0	?	10	2.03336	6	3.08545	0	?	33	1.9909	2	2.52315	0	?
1	3955082	3984538	1p36.32	62	0	?	7	1.37308	7	55	1.8862	4	29457	0.0100554	9.1993	2	7	1.84102	0	?	4	1.36469	16	1.87549	0	?	0	?	32	1.90145	0	?	3	1.38426
1	6585947	6741083	1p36.31	62	0	?	7	1.38187	7	55	1.89753	23	155137	0.0100554	9.1993	2	7	1.84778	0	?	4	1.38008	16	1.87549	0	?	0	?	32	1.91944	0	?	3	1.38426
1	6741083	7172564	1p36.31 - 1p36.23	62	0	?	7	1.38187	7	55	1.90243	73	431482	0.0100554	9.1993	2	7	1.88629	0	?	4	1.38008	16	1.87549	0	?	0	?	32	1.91944	0	?	3	1.38426
1	7172564	7405772	1p36.23	62	0	?	7	1.38187	7	55	1.90866	35	233209	0.0100554	9.1993	2	7	1.93519	0	?	4	1.38008	16	1.87549	0	?	0	?	32	1.91944	0	?	3	1.38426
1	7823251	8612752	1p36.23	62	0	?	7	1.38187	7	55	1.90249	85	789502	0.0100554	9.1993	2	7	1.93519	0	?	4	1.38008	16	1.87254	0	?	0	?	32	1.91031	0	?	3	1.38426
1	8941715	8986019	1p36.23	62	0	?	7	1.39237	7	55	1.90249	8	44305	0.0100554	9.1993	2	7	1.93519	0	?	4	1.38008	16	1.87254	0	?	0	?	32	1.91031	0	?	3	1.40876
1	8986019	9500110	1p36.23 - 1p36.22	62	0	?	7	1.39237	7	55	1.89502	80	514092	0.0100554	9.1993	2	7	1.87648	0	?	4	1.38008	16	1.87254	0	?	0	?	32	1.91031	0	?	3	1.40876
1	9788176	10256886	1p36.22	62	0	?	7	1.39273	7	55	1.90322	78	468711	0.0100554	9.1993	2	7	1.94093	0	?	4	1.38055	16	1.87254	0	?	0	?	32	1.91031	0	?	3	1.40898
1	10491615	10664790	1p36.22	62	0	?	7	1.38755	7	55	1.90322	31	173176	0.0100554	9.1993	2	7	1.94093	0	?	4	1.38055	16	1.87254	0	?	0	?	32	1.91031	0	?	3	1.39688
1	10664790	10842422	1p36.22	62	0	?	7	1.38755	7	55	1.91324	31	177633	0.0100554	9.1993	2	7	1.94093	0	?	4	1.38055	16	1.87254	0	?	0	?	32	1.92753	0	?	3	1.39688
1	10842422	11824972	1p36.22	62	0	?	7	1.38755	7	55	1.90661	178	982551	0.0100554	9.1993	2	7	1.88883	0	?	4	1.38055	16	1.87254	0	?	0	?	32	1.92753	0	?	3	1.39688
1	11976358	12644460	1p36.22 - 1p36.21	62	0	?	7	1.38759	7	55	1.90661	117	668103	0.0100554	9.1993	2	7	1.88883	0	?	4	1.38063	16	1.87254	0	?	0	?	32	1.92753	0	?	3	1.39688
1	12644460	13646344	1p36.21	62	0	?	7	1.35188	7	55	1.90661	29	1001885	0.0100554	9.1993	2	7	1.88883	0	?	4	1.38063	16	1.87254	0	?	0	?	32	1.92753	0	?	3	1.31355
1	13646344	13672383	1p36.21	62	0	?	7	1.35188	7	55	1.9026	8	26040	0.0100554	9.1993	2	7	1.85731	0	?	4	1.38063	16	1.87254	0	?	0	?	32	1.92753	0	?	3	1.31355
1	13672383	13722805	1p36.21	62	0	?	7	1.38319	7	55	1.9026	12	50423	0.0100554	9.1993	2	7	1.85731	0	?	4	1.38063	16	1.87254	0	?	0	?	32	1.92753	0	?	3	1.38659
1	13722805	14868375	1p36.21	62	0	?	7	1.38319	7	55	1.89078	195	1145571	0.0100554	9.1993	2	7	1.85731	0	?	4	1.38063	16	1.87254	0	?	0	?	32	1.90722	0	?	3	1.38659
1	14868375	15314253	1p36.21	62	0	?	7	1.38319	7	55	1.89559	72	445879	0.0100554	9.1993	2	7	1.85731	0	?	4	1.38063	16	1.87254	0	?	0	?	32	1.91549	0	?	3	1.38659
1	15314253	17635641	1p36.21 - 1p36.13	62	0	?	7	1.38319	7	55	1.90065	280	2321389	0.0100554	9.1993	2	7	1.89701	0	?	4	1.38063	16	1.87254	0	?	0	?	32	1.91549	0	?	3	1.38659
1	17783094	17935626	1p36.13	62	0	?	7	1.37949	7	55	1.90065	28	152533	0.0100554	9.1993	2	7	1.89701	0	?	4	1.37416	16	1.87254	0	?	0	?	32	1.91549	0	?	3	1.38659
1	17935626	19064201	1p36.13	62	0	?	7	1.37949	7	55	1.89334	213	1128576	0.0100554	9.1993	2	7	1.83958	0	?	4	1.37416	16	1.87254	0	?	0	?	32	1.91549	0	?	3	1.38659
1	19064201	20901702	1p36.13 - 1p36.12	62	0	?	7	1.37949	7	55	1.8998	256	1837502	0.0100554	9.1993	2	7	1.89035	0	?	4	1.37416	16	1.87254	0	?	0	?	32	1.91549	0	?	3	1.38659
1	21211065	22061125	1p36.12	62	0	?	7	1.38074	7	55	1.89531	78	850061	0.0100554	9.1993	2	7	1.89035	0	?	4	1.37416	16	1.87285	0	?	0	?	32	1.90762	0	?	3	1.38952
1	22061125	23221546	1p36.12	62	0	?	7	1.38074	7	55	1.89807	168	1160422	0.0100554	9.1993	2	7	1.89035	0	?	4	1.37416	16	1.87285	0	?	0	?	32	1.91236	0	?	3	1.38952
20	57530595	57906784	20q13.32 - 20q13.33	61	13	2.73677	0	?	13	48	2.17472	51	376190	0.0102788	9.15535	2	5	2.13663	6	2.75641	0	?	13	2.15615	3	2.67131	0	?	30	2.18911	4	2.7564	0	?
20	53938419	53984784	20q13.2	62	17	2.76556	0	?	17	45	2.17334	8	46366	0.0102837	9.15438	2	4	2.18875	7	2.801	0	?	12	2.1415	4	2.66806	0	?	29	2.18439	6	2.78921	0	?
20	52749891	52777204	20q13.2	61	19	2.79628	0	?	19	42	2.17959	3	27314	0.0107437	9.06687	2	3	2.2448	7	2.79759	0	?	11	2.15994	5	2.84781	0	?	28	2.18032	7	2.75815	0	?
20	52777204	52868000	20q13.2	61	19	2.83128	0	?	19	42	2.17959	12	90797	0.0107437	9.06687	2	3	2.2448	7	2.8926	0	?	11	2.15994	5	2.84781	0	?	28	2.18032	7	2.75815	0	?
20	62192614	62380353	20q13.33	60	12	2.70067	1	1.37717	13	47	2.14858	31	187740	0.0113529	12.9843	4	4	2.25371	5	2.6737	1	1.37717	13	2.10681	3	2.67131	0	?	30	2.15266	4	2.7564	0	?
1	7405772	7705317	1p36.23	61	0	?	7	1.38187	7	54	1.91332	57	299546	0.0114341	8.94231	2	7	1.93519	0	?	4	1.38008	15	1.89006	0	?	0	?	32	1.91944	0	?	3	1.38426
1	7705317	7823251	1p36.23	61	0	?	7	1.38187	7	54	1.90791	21	117935	0.0114341	8.94231	2	7	1.93519	0	?	4	1.38008	15	1.89006	0	?	0	?	32	1.91031	0	?	3	1.38426
14	83688749	83721352	14q31.2	62	2	3.6709	4	1.23474	6	56	1.89543	3	32604	0.0115291	12.9487	4	7	1.82534	1	3.72432	3	1.26378	15	1.90682	1	3.61747	0	?	34	1.90483	0	?	1	1.1476
5	35377072	35687719	5p13.2	62	7	2.82108	0	?	7	55	2.00835	47	310648	0.0116629	8.90268	2	10	1.98483	1	2.8749	0	?	11	2.06488	5	2.86625	0	?	34	1.99698	1	2.54142	0	?
5	1872138	1912885	5p15.33	62	7	2.66688	0	?	7	55	2.0079	3	40748	0.0119693	8.85082	2	11	1.97546	0	?	0	?	11	2.00605	5	2.72436	0	?	33	2.01933	2	2.52315	0	?
5	1912885	2002657	5p15.33	62	7	2.66688	0	?	7	55	2.00421	23	89773	0.0119693	8.85082	2	11	1.97546	0	?	0	?	11	2.00605	5	2.72436	0	?	33	2.01319	2	2.52315	0	?
5	2002657	2596174	5p15.33	62	7	2.66688	0	?	7	55	2.00871	114	593518	0.0119693	8.85082	2	11	1.97546	0	?	0	?	11	2.02852	5	2.72436	0	?	33	2.01319	2	2.52315	0	?
5	2596174	6906445	5p15.33 - 5p15.31	62	7	2.66688	0	?	7	55	2.01219	739	4310272	0.0119693	8.85082	2	11	1.97546	0	?	0	?	11	2.04593	5	2.72436	0	?	33	2.01319	2	2.52315	0	?
5	15151422	16434843	5p15.1	62	7	2.69061	0	?	7	55	2.00719	160	1283422	0.0119693	8.85082	2	11	2.0169	0	?	0	?	11	2.04665	5	2.7576	0	?	33	1.99081	2	2.52315	0	?
5	32477355	35181051	5p13.3 - 5p13.2	62	7	2.76822	0	?	7	55	2.0116	391	2703697	0.0119693	8.85082	2	11	2.02043	0	?	0	?	11	2.06488	5	2.86625	0	?	33	1.9909	2	2.52315	0	?
20	52989337	53591986	20q13.2	62	18	2.8457	0	?	18	44	2.17799	57	602650	0.0120794	8.83251	2	4	2.18875	7	2.8926	0	?	11	2.15994	5	2.84781	0	?	29	2.18335	6	2.78921	0	?
20	53880746	53938419	20q13.2	62	18	2.81007	0	?	18	44	2.17108	12	57674	0.0120794	8.83251	2	4	2.18875	7	2.801	0	?	11	2.12955	5	2.84781	0	?	29	2.18439	6	2.78921	0	?
20	43113497	43841174	20q13.12	62	17	2.72577	0	?	17	45	2.15556	77	727678	0.0121407	8.82238	2	4	2.07347	7	2.74803	0	?	13	2.14558	3	2.67131	0	?	28	2.17192	7	2.72685	0	?
20	44795537	45097515	20q13.12	62	17	2.72228	0	?	17	45	2.15556	48	301979	0.0121407	8.82238	2	4	2.07347	7	2.73957	0	?	13	2.14558	3	2.67131	0	?	28	2.17192	7	2.72685	0	?
20	51589469	51629698	20q13.2	62	17	2.73792	0	?	17	45	2.1558	8	40230	0.0121407	8.82238	2	4	2.16504	7	2.74623	0	?	13	2.13624	3	2.67131	0	?	28	2.16357	7	2.75815	0	?
20	52002100	52123812	20q13.2	62	17	2.73792	0	?	17	45	2.15541	26	121713	0.0121407	8.82238	2	4	2.16063	7	2.74623	0	?	13	2.13624	3	2.67131	0	?	28	2.16357	7	2.75815	0	?
5	6906445	7132642	5p15.31	61	7	2.66688	0	?	7	54	2.00742	28	226198	0.0135772	8.59873	2	10	1.94604	0	?	0	?	11	2.04593	5	2.72436	0	?	33	2.01319	2	2.52315	0	?
5	31631039	32477355	5p13.3	61	7	2.76822	0	?	7	54	2.00484	146	846317	0.0135772	8.59873	2	10	1.98483	0	?	0	?	11	2.06488	5	2.86625	0	?	33	1.9909	2	2.52315	0	?
20	53591986	53617641	20q13.2	61	18	2.8457	0	?	18	43	2.17973	6	25656	0.014391	8.48231	2	4	2.18875	7	2.8926	0	?	11	2.15994	5	2.84781	0	?	28	2.18622	6	2.78921	0	?
20	53784038	53855607	20q13.2	61	18	2.84495	0	?	18	43	2.17973	13	71570	0.014391	8.48231	2	4	2.18875	7	2.89068	0	?	11	2.15994	5	2.84781	0	?	28	2.18622	6	2.78921	0	?
20	53855607	53880746	20q13.2	61	18	2.81007	0	?	18	43	2.17973	3	25140	0.014391	8.48231	2	4	2.18875	7	2.801	0	?	11	2.15994	5	2.84781	0	?	28	2.18622	6	2.78921	0	?
1	192224571	192975948	1q31.3	62	4	3.01002	2	1.41712	6	56	1.98432	38	751378	0.014469	12.4228	4	7	1.9139	3	3.12503	1	1.48429	15	1.95778	1	2.66501	0	?	34	2.01053	0	?	1	1.34996
20	47790152	47871478	20q13.13	61	17	2.72855	1	1.14531	18	43	2.16844	17	81327	0.0145765	12.4056	4	3	2.2448	6	2.75243	1	1.14531	13	2.14558	3	2.67131	0	?	27	2.17096	8	2.7321	0	?
5	12708571	12929540	5p15.2	62	11	2.79315	0	?	11	51	1.97801	16	220970	0.0147437	8.43388	2	8	1.93304	3	2.57468	0	?	10	2.03653	6	2.99239	0	?	33	1.97118	2	2.52315	0	?
5	12929540	13298052	5p15.2	62	11	2.79315	0	?	11	51	1.99071	10	368513	0.0147437	8.43388	2	8	1.93304	3	2.57468	0	?	10	2.03653	6	2.99239	0	?	33	1.99081	2	2.52315	0	?
9	105777268	105864079	9q31.1	62	5	2.88343	1	1.00911	6	56	1.99626	7	86812	0.0153002	12.293	4	7	1.93016	3	3.12784	1	1.00911	16	1.9873	0	?	0	?	33	2.01463	2	2.51681	0	?
14	98110884	98215647	14q32.2	62	1	2.62882	5	1.41954	6	56	1.91631	16	104764	0.0153002	12.293	4	7	1.89586	1	2.62882	3	1.40968	16	1.92471	0	?	0	?	33	1.91657	0	?	2	1.43432
5	12274598	12563222	5p15.2	62	10	2.80851	0	?	10	52	1.98821	19	288625	0.0162237	8.24256	2	9	1.94163	2	2.54221	0	?	10	2.03653	6	2.99239	0	?	33	1.98626	2	2.52315	0	?
5	12563222	12708571	5p15.2	62	10	2.80851	0	?	10	52	1.97864	11	145350	0.0162237	8.24256	2	9	1.94163	2	2.54221	0	?	10	2.03653	6	2.99239	0	?	33	1.97118	2	2.52315	0	?
5	13298052	13447939	5p15.2	62	10	2.80851	0	?	10	52	1.99307	23	149888	0.0162237	8.24256	2	9	1.95311	2	2.54221	0	?	10	2.03653	6	2.99239	0	?	33	1.99081	2	2.52315	0	?
5	22566386	22878848	5p14.3	62	10	2.90564	0	?	10	52	1.99794	49	312463	0.0162237	8.24256	2	9	2.01203	2	2.74871	0	?	10	2.03336	6	3.08545	0	?	33	1.98336	2	2.52315	0	?
5	23236126	25415414	5p14.3 - 5p14.1	62	10	2.90564	0	?	10	52	1.99789	343	2179289	0.0162237	8.24256	2	9	2.01203	2	2.74871	0	?	10	2.03336	6	3.08545	0	?	33	1.98329	2	2.52315	0	?
5	25415414	27098387	5p14.1	62	10	2.90564	0	?	10	52	1.9905	267	1682974	0.0162237	8.24256	2	9	1.96934	2	2.74871	0	?	10	2.03336	6	3.08545	0	?	33	1.98329	2	2.52315	0	?
5	27098387	27561433	5p14.1	62	10	2.90564	0	?	10	52	1.99845	56	463047	0.0162237	8.24256	2	9	2.01522	2	2.74871	0	?	10	2.03336	6	3.08545	0	?	33	1.98329	2	2.52315	0	?
5	27826135	28651770	5p14.1	62	10	2.90564	0	?	10	52	1.99155	124	825636	0.0162237	8.24256	2	9	2.01665	2	2.74871	0	?	10	2.03336	6	3.08545	0	?	33	1.97204	2	2.52315	0	?
5	28651770	29872343	5p14.1 - 5p13.3	62	10	2.90564	0	?	10	52	1.99782	188	1220574	0.0162237	8.24256	2	9	2.01665	2	2.74871	0	?	10	2.03336	6	3.08545	0	?	33	1.98191	2	2.52315	0	?
5	29872343	30737491	5p13.3	62	10	2.90564	0	?	10	52	1.99249	104	865149	0.0162237	8.24256	2	9	1.98584	2	2.74871	0	?	10	2.03336	6	3.08545	0	?	33	1.98191	2	2.52315	0	?
5	30737491	30803912	5p13.3	62	10	2.90564	0	?	10	52	1.99419	9	66422	0.0162237	8.24256	2	9	1.98584	2	2.74871	0	?	10	2.03336	6	3.08545	0	?	33	1.9846	2	2.52315	0	?
5	27561433	27652759	5p14.1	61	10	2.90564	0	?	10	51	2.00422	12	91327	0.0165093	8.20766	2	8	2.05416	2	2.74871	0	?	10	2.03336	6	3.08545	0	?	33	1.98329	2	2.52315	0	?
5	27652759	27826135	5p14.1	61	10	2.90564	0	?	10	51	1.99694	24	173377	0.0165093	8.20766	2	8	2.05416	2	2.74871	0	?	10	2.03336	6	3.08545	0	?	33	1.97204	2	2.52315	0	?
20	55502436	55731710	20q13.31	61	15	2.75251	0	?	15	46	2.18226	39	229275	0.0173974	8.10287	2	4	2.2517	6	2.75641	0	?	13	2.15615	3	2.67131	0	?	29	2.18439	6	2.78921	0	?
20	55950127	56208086	20q13.32	61	15	2.75251	0	?	15	46	2.16913	40	257960	0.0173974	8.10287	2	4	2.10068	6	2.75641	0	?	13	2.15615	3	2.67131	0	?	29	2.18439	6	2.78921	0	?
8	43018336	43569376	8p11.21 - 8p11.1	62	3	2.7897	4	1.34465	7	55	2.00505	3	551041	0.0175816	11.9692	4	11	1.97626	0	?	0	?	13	1.98796	3	2.7897	0	?	31	2.02244	0	?	4	1.34465
1	185620830	185668390	1q31.1	62	4	2.96061	3	1.23647	7	55	2.00434	6	47561	0.0185871	11.8393	4	7	1.90621	3	3.05915	1	0.944274	15	1.94556	1	2.66501	0	?	33	2.05187	0	?	2	1.38258
1	185668390	186202202	1q31.1	62	4	2.96061	3	1.23647	7	55	2.0004	42	533813	0.0185871	11.8393	4	7	1.90621	3	3.05915	1	0.944274	15	1.93113	1	2.66501	0	?	33	2.05187	0	?	2	1.38258
5	22878848	23236126	5p14.3	61	10	2.90564	0	?	10	51	2.00116	54	357279	0.0186215	7.96687	2	9	2.01203	2	2.74871	0	?	10	2.03336	6	3.08545	0	?	32	1.98804	2	2.52315	0	?
20	57487233	57530595	20q13.32	62	14	2.75134	0	?	14	48	2.17472	8	43363	0.0188643	7.94096	2	5	2.13663	6	2.75641	0	?	13	2.15615	3	2.67131	0	?	30	2.18911	5	2.79329	0	?
20	52123812	52139584	20q13.2	62	18	2.7335	0	?	18	44	2.15502	4	15773	0.0192053	7.90514	2	4	2.16063	7	2.74623	0	?	12	2.1332	4	2.66806	0	?	28	2.16357	7	2.75815	0	?
20	45097515	45944505	20q13.12 - 20q13.13	62	18	2.71202	0	?	18	44	2.1546	132	846991	0.0196259	7.86181	2	4	2.07347	7	2.73957	0	?	13	2.14558	3	2.67131	0	?	27	2.17096	8	2.70319	0	?
20	45944505	46384174	20q13.13	62	18	2.72487	0	?	18	44	2.1546	79	439670	0.0196259	7.86181	2	4	2.07347	7	2.73957	0	?	13	2.14558	3	2.67131	0	?	27	2.17096	8	2.7321	0	?
20	6853219	7326623	20p12.3	62	6	2.79773	2	1.34357	8	54	2.05126	64	473405	0.0197468	11.6977	4	7	1.94331	4	2.85707	0	?	14	2.09837	1	2.60725	1	1.24099	33	2.05417	1	2.75087	1	1.44615
20	7763305	7813746	20p12.3	62	6	2.79773	2	1.34357	8	54	2.05176	6	50442	0.0197468	11.6977	4	7	1.94331	4	2.85707	0	?	14	2.10032	1	2.60725	1	1.24099	33	2.05417	1	2.75087	1	1.44615
1	185577385	185620830	1q31.1	62	4	2.96061	2	1.38258	6	56	2.00441	6	43446	0.0201345	11.6521	4	8	1.91894	3	3.05915	0	?	15	1.94556	1	2.66501	0	?	33	2.05187	0	?	2	1.38258
1	186202202	186260164	1q31.1	62	4	2.96061	2	1.38258	6	56	1.99668	6	57963	0.0201345	11.6521	4	8	1.89192	3	3.05915	0	?	15	1.93113	1	2.66501	0	?	33	2.05187	0	?	2	1.38258
1	186651640	187042375	1q31.1	62	4	2.96061	2	1.38258	6	56	1.998	19	390736	0.0201345	11.6521	4	8	1.89192	3	3.05915	0	?	15	1.94643	1	2.66501	0	?	33	2.04715	0	?	2	1.38258
20	49417978	49826093	20q13.2	60	17	2.72855	0	?	17	43	2.16844	67	408116	0.0207174	7.75357	2	3	2.2448	6	2.75243	0	?	13	2.14558	3	2.67131	0	?	27	2.17096	8	2.7321	0	?
20	7326623	7763305	20p12.3	61	6	2.79773	2	1.34357	8	53	2.04903	52	436683	0.0208889	11.5659	4	7	1.94331	4	2.85707	0	?	13	2.09292	1	2.60725	1	1.24099	33	2.05417	1	2.75087	1	1.44615
1	186260164	186579948	1q31.1	61	4	2.96061	2	1.38258	6	55	1.99803	23	319785	0.0217477	11.4713	4	8	1.89192	3	3.05915	0	?	15	1.93113	1	2.66501	0	?	32	2.05592	0	?	2	1.38258
20	50345731	50986260	20q13.2	62	19	2.73222	0	?	19	43	2.15661	91	640530	0.0234944	7.50199	2	4	2.16504	7	2.72533	0	?	11	2.1346	5	2.70557	0	?	28	2.16404	7	2.75815	0	?
20	51135837	51414975	20q13.2	62	19	2.73992	0	?	19	43	2.15661	49	279139	0.0234944	7.50199	2	4	2.16504	7	2.74623	0	?	11	2.1346	5	2.70557	0	?	28	2.16404	7	2.75815	0	?
20	51563046	51583227	20q13.2	62	19	2.73992	0	?	19	43	2.15629	4	20182	0.0234944	7.50199	2	4	2.16504	7	2.74623	0	?	11	2.1346	5	2.70557	0	?	28	2.16357	7	2.75815	0	?
20	52723303	52749891	20q13.2	62	19	2.79628	0	?	19	43	2.16679	5	26589	0.0234944	7.50199	2	4	2.16063	7	2.79759	0	?	11	2.1346	5	2.84781	0	?	28	2.18032	7	2.75815	0	?
8	42779604	42954949	8p11.21	62	3	3.11595	3	1.41914	6	56	2.00522	3	175346	0.0243657	11.2039	4	11	1.97626	0	?	0	?	13	1.98796	3	3.11595	0	?	32	2.02219	0	?	3	1.41914
18	75418654	75791848	18q23	62	0	?	15	1.26833	15	47	1.78432	47	373195	0.0246696	7.40437	2	5	1.80887	0	?	6	1.23284	12	1.73872	0	?	4	1.28936	30	1.79847	0	?	5	1.29409
20	51414975	51563046	20q13.2	61	19	2.73992	0	?	19	42	2.15718	25	148072	0.0275741	7.18176	2	4	2.16504	7	2.74623	0	?	11	2.1346	5	2.70557	0	?	27	2.16521	7	2.75815	0	?
20	42380785	43113497	20q13.12	61	16	2.72603	0	?	16	45	2.15556	93	732713	0.0293281	7.05842	2	4	2.07347	6	2.75243	0	?	13	2.14558	3	2.67131	0	?	28	2.17192	7	2.72685	0	?
5	91139	1222717	5p15.33	62	6	2.56499	1	1.44922	7	55	2.01718	91	1131579	0.0312056	10.6183	4	10	2.00327	0	?	1	1.44922	12	2.00552	4	2.58591	0	?	33	2.02564	2	2.52315	0	?
5	1222717	1572727	5p15.33	62	6	2.64332	1	1.44922	7	55	2.01718	65	350011	0.0312056	10.6183	4	10	2.00327	0	?	1	1.44922	12	2.00552	4	2.7034	0	?	33	2.02564	2	2.52315	0	?
5	1572727	1741198	5p15.33	62	6	2.64332	1	1.44922	7	55	2.0134	18	168472	0.0312056	10.6183	4	10	2.00327	0	?	1	1.44922	12	2.00552	4	2.7034	0	?	33	2.01933	2	2.52315	0	?
5	1741198	1821682	5p15.33	62	6	2.64332	1	1.44922	7	55	2.00815	13	80485	0.0312056	10.6183	4	10	1.97443	0	?	1	1.44922	12	2.00552	4	2.7034	0	?	33	2.01933	2	2.52315	0	?
20	53617641	53784038	20q13.2	60	17	2.8468	0	?	17	43	2.17973	27	166398	0.0314675	6.9176	2	4	2.18875	6	2.90355	0	?	11	2.15994	5	2.84781	0	?	28	2.18622	6	2.78921	0	?
20	47871478	49043644	20q13.13	62	17	2.72855	1	1.14531	18	44	2.17455	168	1172167	0.031779	10.575	4	4	2.29291	6	2.75243	1	1.14531	13	2.14558	3	2.67131	0	?	27	2.17096	8	2.7321	0	?
20	34983846	35473272	20q11.23	61	15	2.71596	0	?	15	46	2.1619	25	489427	0.034293	6.74563	2	5	2.11156	6	2.75243	0	?	13	2.15795	2	2.57134	0	?	28	2.17272	7	2.72602	0	?
20	31468154	33886908	20q11.21 - 20q11.22	62	15	2.71211	0	?	15	47	2.16321	71	2418755	0.0345181	6.73254	2	5	2.11156	6	2.75243	0	?	13	2.15795	3	2.67523	0	?	29	2.17448	6	2.69022	0	?
20	54198709	54358315	20q13.2	62	15	2.75251	0	?	15	47	2.17882	21	159607	0.0345181	6.73254	2	5	2.20547	6	2.75641	0	?	13	2.15615	3	2.67131	0	?	29	2.18439	6	2.78921	0	?
20	54358315	55502436	20q13.2 - 20q13.31	62	15	2.75251	0	?	15	47	2.1686	178	1144122	0.0345181	6.73254	2	5	2.10936	6	2.75641	0	?	13	2.15615	3	2.67131	0	?	29	2.18439	6	2.78921	0	?
20	55731710	55950127	20q13.31 - 20q13.32	62	15	2.75251	0	?	15	47	2.17133	36	218418	0.0345181	6.73254	2	5	2.13502	6	2.75641	0	?	13	2.15615	3	2.67131	0	?	29	2.18439	6	2.78921	0	?
20	56208086	57487233	20q13.32	62	15	2.75251	0	?	15	47	2.1715	183	1279148	0.0345181	6.73254	2	5	2.13663	6	2.75641	0	?	13	2.15615	3	2.67131	0	?	29	2.18439	6	2.78921	0	?
20	5444137	5616084	20p12.3	61	5	2.71556	3	1.24438	8	53	2.06751	26	171948	0.0347432	10.3626	4	7	1.94331	3	2.73989	0	?	13	2.14355	1	2.60725	2	1.14349	33	2.0639	1	2.75087	1	1.44615
20	5616084	5745596	20p12.3	61	5	2.71556	3	1.24438	8	53	2.07073	23	129513	0.0347432	10.3626	4	7	1.94331	3	2.73989	0	?	13	2.14355	1	2.60725	2	1.14349	33	2.06907	1	2.75087	1	1.44615
20	6518005	6699087	20p12.3	61	5	2.82857	3	1.24438	8	53	2.06872	36	181083	0.0347432	10.3626	4	7	1.94331	3	2.92824	0	?	13	2.14355	1	2.60725	2	1.14349	33	2.06584	1	2.75087	1	1.44615
20	11503013	11710104	20p12.2	61	5	2.79775	3	1.27106	8	53	2.05476	19	207092	0.0347432	10.3626	4	7	1.91131	3	2.87687	0	?	13	2.14565	1	2.60725	2	1.18351	33	2.04939	1	2.75087	1	1.44615
20	17430091	17867578	20p12.1 - 20p11.23	61	5	2.65434	3	1.27718	8	53	2.06931	57	437488	0.0347432	10.3626	4	7	1.94344	3	2.63787	0	?	13	2.12582	1	2.60725	2	1.19499	33	2.07374	1	2.75087	1	1.44155
1	3515600	3700448	1p36.32	62	0	?	8	1.36513	8	54	1.89665	33	184849	0.0368499	6.60181	2	7	1.86288	0	?	4	1.36469	15	1.89006	0	?	1	1.30946	32	1.90712	0	?	3	1.38426
1	3700448	3828810	1p36.32	62	0	?	8	1.36513	8	54	1.89381	25	128363	0.0368499	6.60181	2	7	1.84102	0	?	4	1.36469	15	1.89006	0	?	1	1.30946	32	1.90712	0	?	3	1.38426
1	3828810	3955082	1p36.32	62	0	?	8	1.36513	8	54	1.89045	13	126273	0.0368499	6.60181	2	7	1.84102	0	?	4	1.36469	15	1.89006	0	?	1	1.30946	32	1.90145	0	?	3	1.38426
5	7132642	8853261	5p15.31 - 5p15.2	62	8	2.65011	0	?	8	54	2.00742	228	1720620	0.03793	6.54402	2	10	1.94604	1	2.53272	0	?	11	2.04593	5	2.72436	0	?	33	2.01319	2	2.52315	0	?
5	8853261	9437585	5p15.2	62	8	2.71079	0	?	8	54	2.00742	75	584325	0.03793	6.54402	2	10	1.94604	1	3.01821	0	?	11	2.04593	5	2.72436	0	?	33	2.01319	2	2.52315	0	?
5	9437585	10311034	5p15.2	62	8	2.65331	0	?	8	54	2.00742	170	873450	0.03793	6.54402	2	10	1.94604	1	2.55837	0	?	11	2.04593	5	2.72436	0	?	33	2.01319	2	2.52315	0	?
5	11069387	11199840	5p15.2	62	8	2.70587	0	?	8	54	2.00051	26	130454	0.03793	6.54402	2	10	1.90873	1	2.50471	0	?	11	2.04593	5	2.81918	0	?	33	2.01319	2	2.52315	0	?
5	13996236	14559929	5p15.2	62	8	2.66738	0	?	8	54	1.98934	94	563694	0.03793	6.54402	2	10	1.92147	1	2.50471	0	?	11	2.04665	5	2.7576	0	?	33	1.99081	2	2.52315	0	?
5	14559929	15103144	5p15.2 - 5p15.1	62	8	2.66738	0	?	8	54	1.99478	84	543216	0.03793	6.54402	2	10	1.95084	1	2.50471	0	?	11	2.04665	5	2.7576	0	?	33	1.99081	2	2.52315	0	?
5	15103144	15151422	5p15.1	62	8	2.66738	0	?	8	54	2.00402	6	48279	0.03793	6.54402	2	10	2.00076	1	2.50471	0	?	11	2.04665	5	2.7576	0	?	33	1.99081	2	2.52315	0	?
5	31354704	31374127	5p13.3	62	8	2.94653	0	?	8	54	2.00484	3	19424	0.03793	6.54402	2	10	1.98483	1	2.64453	0	?	11	2.06488	5	3.17627	0	?	33	1.9909	2	2.52315	0	?
5	31374127	31399108	5p13.3	62	8	2.81189	0	?	8	54	2.00484	5	24982	0.03793	6.54402	2	10	1.98483	1	2.64453	0	?	11	2.06488	5	2.96086	0	?	33	1.9909	2	2.52315	0	?
5	31399108	31631039	5p13.3	62	8	2.75276	0	?	8	54	2.00484	42	231932	0.03793	6.54402	2	10	1.98483	1	2.64453	0	?	11	2.06488	5	2.86625	0	?	33	1.9909	2	2.52315	0	?
5	35181051	35377072	5p13.2	62	8	2.78155	0	?	8	54	2.00484	35	196022	0.03793	6.54402	2	10	1.98483	1	2.8749	0	?	11	2.06488	5	2.86625	0	?	33	1.9909	2	2.52315	0	?
14	83173282	83280239	14q31.2	62	2	3.6709	5	1.26171	7	55	1.88429	7	106958	0.0388865	10.0932	4	7	1.78278	1	3.72432	3	1.26378	14	1.88515	1	3.61747	1	1.3696	34	1.90483	0	?	1	1.1476
14	83280239	83684062	14q31.2	62	2	3.6709	5	1.26171	7	55	1.88969	28	403824	0.0388865	10.0932	4	7	1.78278	1	3.72432	3	1.26378	14	1.90639	1	3.61747	1	1.3696	34	1.90483	0	?	1	1.1476
5	19654088	19876829	5p14.3	61	9	2.94466	0	?	9	52	2.00878	25	222742	0.0388981	6.49362	2	9	2.01203	2	2.74871	0	?	10	2.08975	5	3.19165	0	?	33	1.98336	2	2.52315	0	?
20	11710104	11742079	20p12.2	60	5	2.79775	3	1.27106	8	52	2.05442	6	31976	0.0390419	10.0837	4	7	1.91131	3	2.87687	0	?	13	2.14565	1	2.60725	2	1.18351	32	2.04866	1	2.75087	1	1.44615
1	6211541	6336786	1p36.31	61	0	?	6	1.3972	6	55	1.90376	19	125246	0.0409027	6.39312	2	7	1.89675	0	?	3	1.41014	16	1.87549	0	?	0	?	32	1.91944	0	?	3	1.38426
1	6336786	6533301	1p36.31	61	0	?	6	1.36514	6	55	1.90376	22	196516	0.0409027	6.39312	2	7	1.89675	0	?	3	1.34602	16	1.87549	0	?	0	?	32	1.91944	0	?	3	1.38426
1	6533301	6585947	1p36.31	61	0	?	6	1.36514	6	55	1.89753	8	52647	0.0409027	6.39312	2	7	1.84778	0	?	3	1.34602	16	1.87549	0	?	0	?	32	1.91944	0	?	3	1.38426
1	9658459	9781169	1p36.22	61	0	?	6	1.41797	6	55	1.89502	20	122711	0.0409027	6.39312	2	7	1.87648	0	?	3	1.42695	16	1.87254	0	?	0	?	32	1.91031	0	?	3	1.40898
1	11824972	11976358	1p36.22	61	0	?	6	1.37122	6	55	1.90661	27	151387	0.0409027	6.39312	2	7	1.88883	0	?	3	1.34557	16	1.87254	0	?	0	?	32	1.92753	0	?	3	1.39688
1	17635641	17783094	1p36.13	61	0	?	6	1.36668	6	55	1.90065	25	147454	0.0409027	6.39312	2	7	1.89701	0	?	3	1.34676	16	1.87254	0	?	0	?	32	1.91549	0	?	3	1.38659
20	50114448	50345731	20q13.2	62	20	2.7231	0	?	20	42	2.16087	27	231284	0.0411878	6.37923	2	4	2.16504	7	2.72533	0	?	11	2.1346	5	2.70557	0	?	27	2.17096	8	2.7321	0	?
9	102309668	103711933	9q31.1	62	6	2.67594	1	1.17864	7	55	1.99607	104	1402266	0.042751	9.86574	4	7	1.93016	3	2.8085	1	1.17864	15	1.9873	1	2.59648	0	?	33	2.01403	2	2.51681	0	?
9	103711933	103758783	9q31.1	62	6	2.67594	1	1.00911	7	55	1.99607	4	46851	0.042751	9.86574	4	7	1.93016	3	2.8085	1	1.00911	15	1.9873	1	2.59648	0	?	33	2.01403	2	2.51681	0	?
9	103758783	104543242	9q31.1	62	6	2.8356	1	1.00911	7	55	1.99607	64	784460	0.042751	9.86574	4	7	1.93016	3	3.12784	1	1.00911	15	1.9873	1	2.59648	0	?	33	2.01403	2	2.51681	0	?
9	104632261	105777268	9q31.1	62	6	2.8356	1	1.00911	7	55	1.99643	75	1145008	0.042751	9.86574	4	7	1.93016	3	3.12784	1	1.00911	15	1.9873	1	2.59648	0	?	33	2.01463	2	2.51681	0	?
1	6178205	6211541	1p36.31	60	0	?	6	1.3972	6	54	1.89971	5	33337	0.0434018	6.27451	2	7	1.89675	0	?	3	1.41014	16	1.87549	0	?	0	?	31	1.91288	0	?	3	1.38426
20	46384174	46884755	20q13.13	61	17	2.72855	0	?	17	44	2.1546	90	500582	0.0442678	6.235	2	4	2.07347	6	2.75243	0	?	13	2.14558	3	2.67131	0	?	27	2.17096	8	2.7321	0	?
20	47540409	47790152	20q13.13	61	17	2.72855	0	?	17	44	2.1546	30	249744	0.0442678	6.235	2	4	2.07347	6	2.75243	0	?	13	2.14558	3	2.67131	0	?	27	2.17096	8	2.7321	0	?
20	49043644	49417978	20q13.13 - 20q13.2	61	17	2.72855	0	?	17	44	2.17455	74	374335	0.0442678	6.235	2	4	2.29291	6	2.75243	0	?	13	2.14558	3	2.67131	0	?	27	2.17096	8	2.7321	0	?
14	83139043	83172555	14q31.2	60	2	3.6709	5	1.26171	7	53	1.88885	3	33513	0.0447501	9.75571	4	7	1.78278	1	3.72432	3	1.26378	13	1.87971	1	3.61747	1	1.3696	33	1.91495	0	?	1	1.1476
9	104543242	104632261	9q31.1	61	6	2.8356	1	1.00911	7	54	1.99016	11	89020	0.0470592	9.63432	4	7	1.93016	3	3.12784	1	1.00911	15	1.9873	1	2.59648	0	?	32	2.00463	2	2.51681	0	?
5	1821682	1872138	5p15.33	62	6	2.64332	0	?	6	56	2.00775	8	50457	0.0472383	6.1051	2	11	1.97546	0	?	0	?	12	2.00552	4	2.7034	0	?	33	2.01933	2	2.52315	0	?
20	6311749	6518005	20p12.3	62	5	2.82857	3	1.24438	8	54	2.07124	30	206257	0.0484659	9.56314	4	8	1.976	3	2.92824	0	?	13	2.14355	1	2.60725	2	1.14349	33	2.06584	1	2.75087	1	1.44615
20	7865305	8249559	20p12.3	62	5	2.82857	3	1.27106	8	54	2.06059	61	384255	0.0484659	9.56314	4	8	1.94887	3	2.92824	0	?	13	2.14565	1	2.60725	2	1.18351	33	2.05417	1	2.75087	1	1.44615
20	8249559	8570778	20p12.3	62	5	2.82857	3	1.27106	8	54	2.05179	59	321220	0.0484659	9.56314	4	8	1.94887	3	2.92824	0	?	13	2.14565	1	2.60725	2	1.18351	33	2.03976	1	2.75087	1	1.44615
20	8570778	9013918	20p12.3 - 20p12.2	62	5	2.82857	3	1.27106	8	54	2.05767	76	443141	0.0484659	9.56314	4	8	1.94887	3	2.92824	0	?	13	2.14565	1	2.60725	2	1.18351	33	2.04939	1	2.75087	1	1.44615
20	9309520	10257037	20p12.2	62	5	2.79312	3	1.27106	8	54	2.05767	161	947518	0.0484659	9.56314	4	8	1.94887	3	2.86916	0	?	13	2.14565	1	2.60725	2	1.18351	33	2.04939	1	2.75087	1	1.44615
20	10257037	11207701	20p12.2	62	5	2.87153	3	1.27106	8	54	2.05767	159	950665	0.0484659	9.56314	4	8	1.94887	3	2.99984	0	?	13	2.14565	1	2.60725	2	1.18351	33	2.04939	1	2.75087	1	1.44615
20	11207701	11503013	20p12.2	62	5	2.79775	3	1.27106	8	54	2.05767	37	295313	0.0484659	9.56314	4	8	1.94887	3	2.87687	0	?	13	2.14565	1	2.60725	2	1.18351	33	2.04939	1	2.75087	1	1.44615
20	11921226	13446509	20p12.1	62	5	2.79775	3	1.27106	8	54	2.05643	160	1525284	0.0484659	9.56314	4	8	1.94683	3	2.87687	0	?	13	2.14565	1	2.60725	2	1.18351	33	2.04785	1	2.75087	1	1.44615
20	13446509	13831719	20p12.1	62	5	2.79775	3	1.27106	8	54	2.06512	27	385211	0.0484659	9.56314	4	8	1.94683	3	2.87687	0	?	13	2.14565	1	2.60725	2	1.18351	33	2.06206	1	2.75087	1	1.44615
20	13831719	13932666	20p12.1	62	5	2.79775	3	1.27106	8	54	2.06051	4	100948	0.0484659	9.56314	4	8	1.94683	3	2.87687	0	?	13	2.14565	1	2.60725	2	1.18351	33	2.05453	1	2.75087	1	1.44615
20	13932666	14331203	20p12.1	62	5	2.79775	3	1.27106	8	54	2.06806	20	398538	0.0484659	9.56314	4	8	1.94683	3	2.87687	0	?	13	2.14565	1	2.60725	2	1.18351	33	2.06688	1	2.75087	1	1.44615
20	16208071	17430091	20p12.1	62	5	2.65434	3	1.27718	8	54	2.0678	162	1222021	0.0484659	9.56314	4	8	1.94898	3	2.63787	0	?	13	2.12582	1	2.60725	2	1.19499	33	2.07374	1	2.75087	1	1.44155
20	19362717	19547872	20p11.23	62	5	2.69672	3	1.27718	8	54	2.08096	24	185156	0.0484659	9.56314	4	8	2.04001	3	2.70849	0	?	13	2.12582	1	2.60725	2	1.19499	33	2.07321	1	2.75087	1	1.44155
20	50986260	51135837	20q13.2	61	18	2.74164	0	?	18	43	2.15661	26	149578	0.0494325	6.01429	2	4	2.16504	6	2.75243	0	?	11	2.1346	5	2.70557	0	?	28	2.16404	7	2.75815	0	?
20	52139584	52374773	20q13.2	61	18	2.78115	0	?	18	43	2.15588	46	235190	0.0494325	6.01429	2	4	2.16063	6	2.75243	0	?	11	2.1346	5	2.84781	0	?	28	2.16357	7	2.75815	0	?
20	52374773	52723303	20q13.2	61	18	2.78115	0	?	18	43	2.16679	37	348531	0.0494325	6.01429	2	4	2.16063	6	2.75243	0	?	11	2.1346	5	2.84781	0	?	28	2.18032	7	2.75815	0	?
