# Supplementary material for: A Genome-Wide Study of Cytogenetic Changes in Colorectal Cancer Using SNP Microarrays: Opportunities for Future Personalized Treatment
Source: PLoS One. 2012 Feb 20;7(2):e31968. doi: 10.1371/journal.pone.0031968 (PMC3282791; doi:10.1371/journal.pone.0031968)
Supplement: Table S6 — Association of CN changes with lymph node metastasis. (CSV) [file pone.0031968.s007.csv]

Chromosome	Start	Stop	cytoband	Total Number of Samples	Total Amplifications	Amplification Average Copy Number	Total Deletions	Deletion Average Copy Number	Total Aberrations	Total Unchanged	Unchanged Average Copy Number	# markers	length (bps)	p-value(LymphNode)	chisq(LymphNode)	df(LymphNode)	# Samples Unchanged LymphNode = 0	Average Copy Number Unchanged LymphNode = 0	# Samples Amplified LymphNode = 0	Average Copy Number Amplified LymphNode = 0	# Samples Deleted LymphNode = 0	Average Copy Number Deleted LymphNode = 0	# Samples Unchanged LymphNode = 1	Average Copy Number Unchanged LymphNode = 1	# Samples Amplified LymphNode = 1	Average Copy Number Amplified LymphNode = 1	# Samples Deleted LymphNode = 1	Average Copy Number Deleted LymphNode = 1
5	12708571	12929540	5p15.2	62	11	2.79315	0	?	11	51	1.97801	16	220970	0.00476459	7.96669	1	18	1.99053	9	2.85315	0	?	33	1.97118	2	2.52315	0	?
5	12929540	13298052	5p15.2	62	11	2.79315	0	?	11	51	1.99071	10	368513	0.00476459	7.96669	1	18	1.99053	9	2.85315	0	?	33	1.99081	2	2.52315	0	?
5	41837910	42008986	5p13.1	61	8	2.83521	0	?	8	53	1.99967	28	171077	0.00589386	7.58247	1	19	2.01204	7	2.87718	0	?	34	1.99275	1	2.54142	0	?
5	42565985	42837911	5p12	61	8	2.77351	0	?	8	53	1.99509	43	271927	0.00589386	7.58247	1	19	2.00128	7	2.80667	0	?	34	1.99163	1	2.54142	0	?
5	42008986	42325894	5p13.1	60	8	2.83521	0	?	8	52	1.99516	18	316909	0.00677027	7.33293	1	19	2.01204	7	2.87718	0	?	33	1.98544	1	2.54142	0	?
5	39170969	39869487	5p13.1	62	8	2.77674	0	?	8	54	2.00119	93	698519	0.00721946	7.21754	1	20	2.00835	7	2.81036	0	?	34	1.99698	1	2.54142	0	?
5	39869487	40224720	5p13.1	62	8	2.77674	0	?	8	54	1.9982	45	355234	0.00721946	7.21754	1	20	2.00835	7	2.81036	0	?	34	1.99223	1	2.54142	0	?
5	40356339	41108743	5p13.1	62	8	2.77674	0	?	8	54	1.99853	90	752405	0.00721946	7.21754	1	20	2.00835	7	2.81036	0	?	34	1.99275	1	2.54142	0	?
5	41108743	41837910	5p13.1	62	8	2.83521	0	?	8	54	1.99853	89	729168	0.00721946	7.21754	1	20	2.00835	7	2.87718	0	?	34	1.99275	1	2.54142	0	?
5	42466856	42527704	5p12	62	8	2.74863	0	?	8	54	1.99789	9	60849	0.00721946	7.21754	1	20	2.00853	7	2.77823	0	?	34	1.99163	1	2.54142	0	?
5	43481791	43646446	5p12	62	8	2.89833	0	?	8	54	1.99187	24	164656	0.00721946	7.21754	1	20	1.99227	7	2.94932	0	?	34	1.99163	1	2.54142	0	?
5	43646446	43878250	5p12	62	8	2.89833	0	?	8	54	2.00755	32	231805	0.00721946	7.21754	1	20	2.03461	7	2.94932	0	?	34	1.99163	1	2.54142	0	?
5	43878250	43895510	5p12	62	8	2.98232	0	?	8	54	2.00755	3	17261	0.00721946	7.21754	1	20	2.03461	7	3.04531	0	?	34	1.99163	1	2.54142	0	?
5	43900049	44977576	5p12	62	8	2.92874	0	?	8	54	2.00553	164	1077528	0.00721946	7.21754	1	20	2.02917	7	2.98408	0	?	34	1.99163	1	2.54142	0	?
5	44977576	45300865	5p12	62	8	2.92874	0	?	8	54	2.003	36	323290	0.00721946	7.21754	1	20	2.02917	7	2.98408	0	?	34	1.98761	1	2.54142	0	?
5	45583617	45768616	5p12	62	8	2.92836	0	?	8	54	2.00065	28	185000	0.00721946	7.21754	1	20	2.02282	7	2.98363	0	?	34	1.98761	1	2.54142	0	?
5	45768616	45791770	5p12	62	8	2.92836	0	?	8	54	1.99717	4	23155	0.00721946	7.21754	1	20	2.01344	7	2.98363	0	?	34	1.98761	1	2.54142	0	?
5	40224720	40356339	5p13.1	61	8	2.77674	0	?	8	53	2.00545	24	131620	0.00825509	6.97728	1	20	2.00835	7	2.81036	0	?	33	2.0037	1	2.54142	0	?
5	42325894	42443196	5p13.1 - 5p12	61	8	2.83521	0	?	8	53	1.99415	5	117303	0.00825509	6.97728	1	20	2.00853	7	2.87718	0	?	33	1.98544	1	2.54142	0	?
5	42443196	42466856	5p12	61	8	2.74863	0	?	8	53	1.99415	4	23661	0.00825509	6.97728	1	20	2.00853	7	2.77823	0	?	33	1.98544	1	2.54142	0	?
5	27561433	27652759	5p14.1	61	10	2.90564	0	?	10	51	2.00422	12	91327	0.00895073	6.83263	1	18	2.0426	8	3.00127	0	?	33	1.98329	2	2.52315	0	?
5	27652759	27826135	5p14.1	61	10	2.90564	0	?	10	51	1.99694	24	173377	0.00895073	6.83263	1	18	2.0426	8	3.00127	0	?	33	1.97204	2	2.52315	0	?
5	12274598	12563222	5p15.2	62	10	2.80851	0	?	10	52	1.98821	19	288625	0.0111311	6.44427	1	19	1.99158	8	2.87984	0	?	33	1.98626	2	2.52315	0	?
5	12563222	12708571	5p15.2	62	10	2.80851	0	?	10	52	1.97864	11	145350	0.0111311	6.44427	1	19	1.99158	8	2.87984	0	?	33	1.97118	2	2.52315	0	?
5	13298052	13447939	5p15.2	62	10	2.80851	0	?	10	52	1.99307	23	149888	0.0111311	6.44427	1	19	1.99701	8	2.87984	0	?	33	1.99081	2	2.52315	0	?
5	22566386	22878848	5p14.3	62	10	2.90564	0	?	10	52	1.99794	49	312463	0.0111311	6.44427	1	19	2.02326	8	3.00127	0	?	33	1.98336	2	2.52315	0	?
5	23236126	25415414	5p14.3 - 5p14.1	62	10	2.90564	0	?	10	52	1.99789	343	2179289	0.0111311	6.44427	1	19	2.02326	8	3.00127	0	?	33	1.98329	2	2.52315	0	?
5	25415414	27098387	5p14.1	62	10	2.90564	0	?	10	52	1.9905	267	1682974	0.0111311	6.44427	1	19	2.00304	8	3.00127	0	?	33	1.98329	2	2.52315	0	?
5	27098387	27561433	5p14.1	62	10	2.90564	0	?	10	52	1.99845	56	463047	0.0111311	6.44427	1	19	2.02477	8	3.00127	0	?	33	1.98329	2	2.52315	0	?
5	27826135	28651770	5p14.1	62	10	2.90564	0	?	10	52	1.99155	124	825636	0.0111311	6.44427	1	19	2.02545	8	3.00127	0	?	33	1.97204	2	2.52315	0	?
5	28651770	29872343	5p14.1 - 5p13.3	62	10	2.90564	0	?	10	52	1.99782	188	1220574	0.0111311	6.44427	1	19	2.02545	8	3.00127	0	?	33	1.98191	2	2.52315	0	?
5	29872343	30737491	5p13.3	62	10	2.90564	0	?	10	52	1.99249	104	865149	0.0111311	6.44427	1	19	2.01085	8	3.00127	0	?	33	1.98191	2	2.52315	0	?
5	30737491	30803912	5p13.3	62	10	2.90564	0	?	10	52	1.99419	9	66422	0.0111311	6.44427	1	19	2.01085	8	3.00127	0	?	33	1.9846	2	2.52315	0	?
5	22878848	23236126	5p14.3	61	10	2.90564	0	?	10	51	2.00116	54	357279	0.012833	6.19199	1	19	2.02326	8	3.00127	0	?	32	1.98804	2	2.52315	0	?
20	52868000	52989337	20q13.2	61	18	2.8457	0	?	18	43	2.18165	15	121338	0.0140163	6.03608	1	14	2.17812	12	2.87394	0	?	29	2.18335	6	2.78921	0	?
5	35687719	35812632	5p13.2	61	7	2.82108	0	?	7	54	2.00787	19	124914	0.0142744	6.00388	1	20	2.02638	6	2.86769	0	?	34	1.99698	1	2.54142	0	?
5	38971185	39170969	5p13.1	61	7	2.80786	0	?	7	54	2.00119	25	199785	0.0142744	6.00388	1	20	2.00835	6	2.85227	0	?	34	1.99698	1	2.54142	0	?
5	42527704	42565985	5p12	61	7	2.74381	0	?	7	54	1.99789	7	38282	0.0142744	6.00388	1	20	2.00853	6	2.77754	0	?	34	1.99163	1	2.54142	0	?
5	42837911	43017173	5p12	61	7	2.80417	0	?	7	54	2.00035	30	179263	0.0142744	6.00388	1	20	2.01518	6	2.84796	0	?	34	1.99163	1	2.54142	0	?
5	43024462	43481791	5p12	61	7	2.73675	0	?	7	54	1.99187	69	457330	0.0142744	6.00388	1	20	1.99227	6	2.7693	0	?	34	1.99163	1	2.54142	0	?
5	45300865	45583617	5p12	61	7	2.97607	0	?	7	54	2.003	33	282753	0.0142744	6.00388	1	20	2.02917	6	3.04852	0	?	34	1.98761	1	2.54142	0	?
5	35377072	35687719	5p13.2	62	7	2.82108	0	?	7	55	2.00835	47	310648	0.0168982	5.70691	1	21	2.02676	6	2.86769	0	?	34	1.99698	1	2.54142	0	?
20	52989337	53591986	20q13.2	62	18	2.8457	0	?	18	44	2.17799	57	602650	0.0188638	5.51409	1	15	2.16762	12	2.87394	0	?	29	2.18335	6	2.78921	0	?
20	53880746	53938419	20q13.2	62	18	2.81007	0	?	18	44	2.17108	12	57674	0.0188638	5.51409	1	15	2.14533	12	2.8205	0	?	29	2.18439	6	2.78921	0	?
5	19654088	19876829	5p14.3	61	9	2.94466	0	?	9	52	2.00878	25	222742	0.020898	5.33528	1	19	2.05294	7	3.06509	0	?	33	1.98336	2	2.52315	0	?
20	53591986	53617641	20q13.2	61	18	2.8457	0	?	18	43	2.17973	6	25656	0.0226471	5.19537	1	15	2.16762	12	2.87394	0	?	28	2.18622	6	2.78921	0	?
20	53784038	53855607	20q13.2	61	18	2.84495	0	?	18	43	2.17973	13	71570	0.0226471	5.19537	1	15	2.16762	12	2.87282	0	?	28	2.18622	6	2.78921	0	?
20	53855607	53880746	20q13.2	61	18	2.81007	0	?	18	43	2.17973	3	25140	0.0226471	5.19537	1	15	2.16762	12	2.8205	0	?	28	2.18622	6	2.78921	0	?
5	11199840	11355624	5p15.2	62	9	2.69185	0	?	9	53	2.00783	28	155785	0.0250889	5.01774	1	20	1.999	7	2.74005	0	?	33	2.01319	2	2.52315	0	?
5	11355624	12255583	5p15.2	62	9	2.69185	0	?	9	53	2.00292	112	899960	0.0250889	5.01774	1	20	1.999	7	2.74005	0	?	33	2.0053	2	2.52315	0	?
5	13450591	13996236	5p15.2	62	9	2.65764	0	?	9	53	1.996	82	545646	0.0250889	5.01774	1	20	2.00456	7	2.69606	0	?	33	1.99081	2	2.52315	0	?
5	17760795	17817890	5p15.1	62	9	2.91621	0	?	9	53	2.00243	10	57096	0.0250889	5.01774	1	20	2.02161	7	3.02852	0	?	33	1.99081	2	2.52315	0	?
5	17817890	17935288	5p15.1	62	9	2.94466	0	?	9	53	2.00243	20	117399	0.0250889	5.01774	1	20	2.02161	7	3.06509	0	?	33	1.99081	2	2.52315	0	?
5	17951392	17990440	5p15.1	62	9	2.94466	0	?	9	53	2.01066	7	39049	0.0250889	5.01774	1	20	2.04341	7	3.06509	0	?	33	1.99081	2	2.52315	0	?
5	17990440	18212663	5p15.1	62	9	2.94466	0	?	9	53	2.00839	32	222224	0.0250889	5.01774	1	20	2.04341	7	3.06509	0	?	33	1.98717	2	2.52315	0	?
5	18212663	19654088	5p15.1 - 5p14.3	62	9	2.94466	0	?	9	53	2.00602	185	1441426	0.0250889	5.01774	1	20	2.04341	7	3.06509	0	?	33	1.98336	2	2.52315	0	?
5	19876829	20339337	5p14.3	62	9	2.94466	0	?	9	53	2.00543	47	462509	0.0250889	5.01774	1	20	2.04183	7	3.06509	0	?	33	1.98336	2	2.52315	0	?
5	20339337	21906633	5p14.3	62	9	3.00674	0	?	9	53	2.00543	169	1567297	0.0250889	5.01774	1	20	2.04183	7	3.14491	0	?	33	1.98336	2	2.52315	0	?
5	21906633	22566386	5p14.3	62	9	2.93612	0	?	9	53	2.00543	83	659754	0.0250889	5.01774	1	20	2.04183	7	3.05411	0	?	33	1.98336	2	2.52315	0	?
5	30803912	30863267	5p13.3	62	9	2.9115	0	?	9	53	1.99384	7	59356	0.0250889	5.01774	1	20	2.00909	7	3.02246	0	?	33	1.9846	2	2.52315	0	?
5	30863267	31354704	5p13.3	62	9	2.9115	0	?	9	53	1.99776	96	491438	0.0250889	5.01774	1	20	2.00909	7	3.02246	0	?	33	1.9909	2	2.52315	0	?
20	52749891	52777204	20q13.2	61	19	2.79628	0	?	19	42	2.17959	3	27314	0.0291596	4.75816	1	14	2.17812	12	2.81852	0	?	28	2.18032	7	2.75815	0	?
20	52777204	52868000	20q13.2	61	19	2.83128	0	?	19	42	2.17959	12	90797	0.0291596	4.75816	1	14	2.17812	12	2.87394	0	?	28	2.18032	7	2.75815	0	?
8	43018336	43569376	8p11.21 - 8p11.1	62	3	2.7897	4	1.34465	7	55	2.00505	3	551041	0.0305806	6.97478	2	24	1.9826	3	2.7897	0	?	31	2.02244	0	?	4	1.34465
13	79259039	79834546	13q31.1	62	11	2.81633	0	?	11	51	2.11208	53	575508	0.0313937	4.6313	1	19	2.08514	8	2.71779	0	?	32	2.12808	3	3.07912	0	?
13	79834546	80337935	13q31.1	62	11	2.81633	0	?	11	51	2.10147	32	503390	0.0313937	4.6313	1	19	2.05666	8	2.71779	0	?	32	2.12808	3	3.07912	0	?
13	80337935	80686287	13q31.1	62	11	2.86844	0	?	11	51	2.10147	26	348353	0.0313937	4.6313	1	19	2.05666	8	2.78944	0	?	32	2.12808	3	3.07912	0	?
1	185577385	185620830	1q31.1	62	4	2.96061	2	1.38258	6	56	2.00441	6	43446	0.0322609	6.8678	2	23	1.9363	4	2.96061	0	?	33	2.05187	0	?	2	1.38258
1	186202202	186260164	1q31.1	62	4	2.96061	2	1.38258	6	56	1.99668	6	57963	0.0322609	6.8678	2	23	1.91749	4	2.96061	0	?	33	2.05187	0	?	2	1.38258
1	186651640	187042375	1q31.1	62	4	2.96061	2	1.38258	6	56	1.998	19	390736	0.0322609	6.8678	2	23	1.92747	4	2.96061	0	?	33	2.04715	0	?	2	1.38258
5	35824275	35959871	5p13.2	61	6	2.81211	0	?	6	55	2.00808	25	135597	0.0337033	4.50969	1	21	2.02604	5	2.86625	0	?	34	1.99698	1	2.54142	0	?
5	36842185	37012983	5p13.2	61	6	2.81211	0	?	6	55	2.00997	25	170799	0.0337033	4.50969	1	21	2.031	5	2.86625	0	?	34	1.99698	1	2.54142	0	?
1	186260164	186579948	1q31.1	61	4	2.96061	2	1.38258	6	55	1.99803	23	319785	0.0340739	6.75845	2	23	1.91749	4	2.96061	0	?	32	2.05592	0	?	2	1.38258
13	57803230	58003003	13q21.2	62	13	2.84706	0	?	13	49	2.10299	13	199774	0.0356603	4.41328	1	18	2.06392	9	2.78748	0	?	31	2.12567	4	2.9811	0	?
13	58003003	58508945	13q21.2	62	13	2.84706	0	?	13	49	2.09838	39	505943	0.0356603	4.41328	1	18	2.06392	9	2.78748	0	?	31	2.11838	4	2.9811	0	?
13	58508945	58820875	13q21.2	62	13	2.77323	0	?	13	49	2.09838	38	311931	0.0356603	4.41328	1	18	2.06392	9	2.68084	0	?	31	2.11838	4	2.9811	0	?
13	59138198	59327304	13q21.2	62	13	2.76175	0	?	13	49	2.09838	8	189107	0.0356603	4.41328	1	18	2.06392	9	2.66427	0	?	31	2.11838	4	2.9811	0	?
13	59327304	60033076	13q21.2	62	13	2.76175	0	?	13	49	2.1062	38	705773	0.0356603	4.41328	1	18	2.08522	9	2.66427	0	?	31	2.11838	4	2.9811	0	?
13	60033076	61085290	13q21.2 - 13q21.31	62	13	2.76175	0	?	13	49	2.0996	108	1052215	0.0356603	4.41328	1	18	2.06724	9	2.66427	0	?	31	2.11838	4	2.9811	0	?
13	61085290	61311563	13q21.31	62	13	2.86442	0	?	13	49	2.0996	8	226274	0.0356603	4.41328	1	18	2.06724	9	2.81257	0	?	31	2.11838	4	2.9811	0	?
20	57906784	58091412	20q13.33	62	13	2.73677	0	?	13	49	2.17649	17	184629	0.0356603	4.41328	1	18	2.15073	9	2.72804	0	?	31	2.19145	4	2.7564	0	?
20	58091412	58382253	20q13.33	62	13	2.73677	0	?	13	49	2.18512	48	290842	0.0356603	4.41328	1	18	2.17422	9	2.72804	0	?	31	2.19145	4	2.7564	0	?
20	58382253	59485436	20q13.33	62	13	2.73677	0	?	13	49	2.1892	209	1103184	0.0356603	4.41328	1	18	2.17422	9	2.72804	0	?	31	2.19789	4	2.7564	0	?
20	59485436	59945675	20q13.33	62	13	2.73677	0	?	13	49	2.18106	76	460240	0.0356603	4.41328	1	18	2.17422	9	2.72804	0	?	31	2.18504	4	2.7564	0	?
20	53617641	53784038	20q13.2	60	17	2.8468	0	?	17	43	2.17973	27	166398	0.0356744	4.4126	1	15	2.16762	11	2.87821	0	?	28	2.18622	6	2.78921	0	?
18	75418654	75791848	18q23	62	0	?	15	1.26833	15	47	1.78432	47	373195	0.0380726	4.30177	1	17	1.75935	0	?	10	1.25545	30	1.79847	0	?	5	1.29409
20	50345731	50986260	20q13.2	62	19	2.73222	0	?	19	43	2.15661	91	640530	0.0384476	4.28511	1	15	2.14272	12	2.7171	0	?	28	2.16404	7	2.75815	0	?
20	51135837	51414975	20q13.2	62	19	2.73992	0	?	19	43	2.15661	49	279139	0.0384476	4.28511	1	15	2.14272	12	2.72929	0	?	28	2.16404	7	2.75815	0	?
20	51563046	51583227	20q13.2	62	19	2.73992	0	?	19	43	2.15629	4	20182	0.0384476	4.28511	1	15	2.14272	12	2.72929	0	?	28	2.16357	7	2.75815	0	?
20	52723303	52749891	20q13.2	62	19	2.79628	0	?	19	43	2.16679	5	26589	0.0384476	4.28511	1	15	2.14154	12	2.81852	0	?	28	2.18032	7	2.75815	0	?
1	29342734	29503339	1p35.3	62	0	?	6	1.31746	6	56	1.88311	11	160606	0.0386304	4.27705	1	22	1.87546	0	?	5	1.28987	34	1.88806	0	?	1	1.45538
1	29506600	30734102	1p35.3 - 1p35.2	62	0	?	6	1.31293	6	56	1.88311	220	1227503	0.0386304	4.27705	1	22	1.87546	0	?	5	1.28444	34	1.88806	0	?	1	1.45538
5	35959871	36842185	5p13.2	62	6	2.81211	0	?	6	56	2.01658	153	882315	0.0386304	4.27705	1	22	2.04687	5	2.86625	0	?	34	1.99698	1	2.54142	0	?
5	37012983	37898127	5p13.2	62	6	2.81211	0	?	6	56	2.01684	73	885145	0.0386304	4.27705	1	22	2.04753	5	2.86625	0	?	34	1.99698	1	2.54142	0	?
5	37898127	38971185	5p13.2 - 5p13.1	62	6	2.81211	0	?	6	56	2.0112	174	1073059	0.0386304	4.27705	1	22	2.03317	5	2.86625	0	?	34	1.99698	1	2.54142	0	?
9	75378879	76209623	9q21.13	62	6	2.85535	0	?	6	56	1.97944	108	830745	0.0386304	4.27705	1	22	1.95645	5	2.92225	0	?	34	1.99431	1	2.52088	0	?
20	53938419	53984784	20q13.2	62	17	2.76556	0	?	17	45	2.17334	8	46366	0.0389077	4.26489	1	16	2.15331	11	2.75266	0	?	29	2.18439	6	2.78921	0	?
20	57530595	57906784	20q13.32 - 20q13.33	61	13	2.73677	0	?	13	48	2.17472	51	376190	0.04103	4.17477	1	18	2.15073	9	2.72804	0	?	30	2.18911	4	2.7564	0	?
8	42779604	42954949	8p11.21	62	3	3.11595	3	1.41914	6	56	2.00522	3	175346	0.0447336	6.21406	2	24	1.9826	3	3.11595	0	?	32	2.02219	0	?	3	1.41914
20	51414975	51563046	20q13.2	61	19	2.73992	0	?	19	42	2.15718	25	148072	0.0456714	3.99367	1	15	2.14272	12	2.72929	0	?	27	2.16521	7	2.75815	0	?
20	59945675	59988404	20q13.33	62	13	2.73677	1	1.37717	14	48	2.18294	4	42730	0.0479474	6.0753	2	17	2.17911	9	2.72804	1	1.37717	31	2.18504	4	2.7564	0	?
20	61018455	61253017	20q13.33	62	13	2.73677	1	1.37717	14	48	2.15928	37	234563	0.0479474	6.0753	2	17	2.15407	9	2.72804	1	1.37717	31	2.16214	4	2.7564	0	?
20	61253017	62064557	20q13.33	62	13	2.73677	1	1.37717	14	48	2.15479	114	811541	0.0479474	6.0753	2	17	2.14137	9	2.72804	1	1.37717	31	2.16214	4	2.7564	0	?
14	83139043	83172555	14q31.2	60	2	3.6709	5	1.26171	7	53	1.88885	3	33513	0.0490655	6.0292	2	20	1.84578	2	3.6709	4	1.29024	33	1.91495	0	?	1	1.1476
