# Supplementary material for: A Genome-Wide Study of Cytogenetic Changes in Colorectal Cancer Using SNP Microarrays: Opportunities for Future Personalized Treatment
Source: PLoS One. 2012 Feb 20;7(2):e31968. doi: 10.1371/journal.pone.0031968 (PMC3282791; doi:10.1371/journal.pone.0031968)
Supplement: Table S8 — List of genes found to be significantly amplified in tumor tissue in at least 10% of samples. (CSV) [file pone.0031968.s009.csv]

Table S8: List of genes found to be significantly amplified in tumor tissue in at least 10% of samples
chromosome	Transcript start	Transcript end	Transcript ID	Gene Symbol	chromosome	start	end	gene overlap percent	cytoband	length (bps)	# samples	Copy Number	average CN
20	50133957	50241932	NM_199427	ZFP64	20	50114448	50345731	1	20q13.2	231284	21	Amplification	2.72005
20	50201224	50241932	NM_018197	ZFP64	20	50114448	50345731	1	20q13.2	231284	21	Amplification	2.72005
20	50201224	50241932	NM_022088	ZFP64	20	50114448	50345731	1	20q13.2	231284	21	Amplification	2.72005
20	50201224	50241932	NM_199426	ZFP64	20	50114448	50345731	1	20q13.2	231284	21	Amplification	2.72005
20	51022353	51545277	NM_173485	TSHZ2	20	51135837	51583227	0.782982	20q13.2	447391	20	Amplification	2.73589
20	51235229	51545277	NM_001193421	TSHZ2	20	51135837	51583227	1	20q13.2	447391	20	Amplification	2.73589
20	52203395	52223924	NM_000782	CYP24A1	20	52139584	52723303	1	20q13.2	583720	20	Amplification	2.79673
20	52203395	52223924	NM_001128915	CYP24A1	20	52139584	52723303	1	20q13.2	583720	20	Amplification	2.79673
20	52257909	52269900	NM_002623	PFDN4	20	52139584	52723303	1	20q13.2	583720	20	Amplification	2.79673
20	52525673	52701118	NM_018431	DOK5	20	52139584	52723303	1	20q13.2	583720	20	Amplification	2.79673
20	44956670	45250900	NM_005244	EYA2	20	45097515	45944505	0.521311	20q13.12 - 20q13.13	846991	19	Amplification	2.70924
20	44956670	45250900	NM_172110	EYA2	20	45097515	45944505	0.521311	20q13.12 - 20q13.13	846991	19	Amplification	2.70924
20	45229016	45229108	NR_037410	MIR3616	20	45097515	45944505	1	20q13.12 - 20q13.13	846991	19	Amplification	2.70924
20	45271788	45418882	NM_012408	ZMYND8	20	45097515	45944505	1	20q13.12 - 20q13.13	846991	19	Amplification	2.70924
20	45271788	45418882	NM_183047	ZMYND8	20	45097515	45944505	1	20q13.12 - 20q13.13	846991	19	Amplification	2.70924
20	45271788	45418882	NM_183048	ZMYND8	20	45097515	45944505	1	20q13.12 - 20q13.13	846991	19	Amplification	2.70924
20	45380653	45382906	NR_024594	LOC100131496	20	45097515	45944505	1	20q13.12 - 20q13.13	846991	19	Amplification	2.70924
20	45564008	45719029	NM_001174087	NCOA3	20	45097515	45944505	1	20q13.12 - 20q13.13	846991	19	Amplification	2.70924
20	45564008	45719029	NM_001174088	NCOA3	20	45097515	45944505	1	20q13.12 - 20q13.13	846991	19	Amplification	2.70924
20	45564008	45719029	NM_006534	NCOA3	20	45097515	45944505	1	20q13.12 - 20q13.13	846991	19	Amplification	2.70924
20	45564008	45719029	NM_181659	NCOA3	20	45097515	45944505	1	20q13.12 - 20q13.13	846991	19	Amplification	2.70924
20	45719557	45848768	NM_001161841	SULF2	20	45097515	45944505	1	20q13.12 - 20q13.13	846991	19	Amplification	2.70924
20	45719557	45848216	NM_018837	SULF2	20	45097515	45944505	1	20q13.12 - 20q13.13	846991	19	Amplification	2.70924
20	45719557	45848768	NM_198596	SULF2	20	45097515	45944505	1	20q13.12 - 20q13.13	846991	19	Amplification	2.70924
20	49833990	49852456	NM_020436	SALL4	20	49826093	49882248	1	20q13.2	56156	19	Amplification	2.73822
20	51022353	51545277	NM_173485	TSHZ2	20	50986260	51135837	0.21702	20q13.2	149578	19	Amplification	2.7373
20	40134806	41251972	NM_007050	PTPRT	20	39893173	41234903	0.984721	20q12 - 20q13.11	1341731	18	Amplification	2.7283
20	40134806	41251972	NM_133170	PTPRT	20	39893173	41234903	0.984721	20q12 - 20q13.11	1341731	18	Amplification	2.7283
20	43028534	43142008	NM_006282	STK4	20	43113497	43841174	0.251262	20q13.12	727678	18	Amplification	2.72207
20	43154364	43163168	NM_002251	KCNS1	20	43113497	43841174	1	20q13.12	727678	18	Amplification	2.72207
20	43171507	43177218	NM_145652	WFDC5	20	43113497	43841174	1	20q13.12	727678	18	Amplification	2.72207
20	43185481	43186521	NM_080869	WFDC12	20	43113497	43841174	1	20q13.12	727678	18	Amplification	2.72207
20	43236954	43238600	NM_002638	PI3	20	43113497	43841174	1	20q13.12	727678	18	Amplification	2.72207
20	43269052	43271829	NM_003007	SEMG1	20	43113497	43841174	1	20q13.12	727678	18	Amplification	2.72207
20	43283424	43286514	NM_003008	SEMG2	20	43113497	43841174	1	20q13.12	727678	18	Amplification	2.72207
20	43314293	43316621	NM_003064	SLPI	20	43113497	43841174	1	20q13.12	727678	18	Amplification	2.72207
20	43355501	43370382	NM_003833	MATN4	20	43113497	43841174	1	20q13.12	727678	18	Amplification	2.72207
20	43355501	43370382	NM_030590	MATN4	20	43113497	43841174	1	20q13.12	727678	18	Amplification	2.72207
20	43355501	43370382	NM_030592	MATN4	20	43113497	43841174	1	20q13.12	727678	18	Amplification	2.72207
20	43368905	43379879	NM_014276	RBPJL	20	43113497	43841174	1	20q13.12	727678	18	Amplification	2.72207
20	43387343	43410479	NM_002999	SDC4	20	43113497	43841174	1	20q13.12	727678	18	Amplification	2.72207
20	43423991	43431277	NM_001197129	SYS1	20	43113497	43841174	1	20q13.12	727678	18	Amplification	2.72207
20	43425154	43438857	NM_001099791	SYS1	20	43113497	43841174	1	20q13.12	727678	18	Amplification	2.72207
20	43425154	43431277	NM_033542	SYS1	20	43113497	43841174	1	20q13.12	727678	18	Amplification	2.72207
20	43425223	43472665	NR_003189	SYS1-DBNDD2	20	43113497	43841174	1	20q13.12	727678	18	Amplification	2.72207
20	43435934	43440372	NM_014477	TP53TG5	20	43113497	43841174	1	20q13.12	727678	18	Amplification	2.72207
20	43468047	43472665	NM_001197139	DBNDD2	20	43113497	43841174	1	20q13.12	727678	18	Amplification	2.72207
20	43468069	43472665	NM_001048221	DBNDD2	20	43113497	43841174	1	20q13.12	727678	18	Amplification	2.72207
20	43468069	43472665	NM_001048222	DBNDD2	20	43113497	43841174	1	20q13.12	727678	18	Amplification	2.72207
20	43468235	43472665	NM_001197140	DBNDD2	20	43113497	43841174	1	20q13.12	727678	18	Amplification	2.72207
20	43468275	43472665	NM_018478	DBNDD2	20	43113497	43841174	1	20q13.12	727678	18	Amplification	2.72207
20	43468642	43472665	NM_001048223	DBNDD2	20	43113497	43841174	1	20q13.12	727678	18	Amplification	2.72207
20	43468642	43472665	NM_001048224	DBNDD2	20	43113497	43841174	1	20q13.12	727678	18	Amplification	2.72207
20	43470043	43472665	NM_001048225	DBNDD2	20	43113497	43841174	1	20q13.12	727678	18	Amplification	2.72207
20	43470043	43472665	NM_001048226	DBNDD2	20	43113497	43841174	1	20q13.12	727678	18	Amplification	2.72207
20	43478121	43488299	NM_001184728	PIGT	20	43113497	43841174	1	20q13.12	727678	18	Amplification	2.72207
20	43478121	43488299	NM_001184729	PIGT	20	43113497	43841174	1	20q13.12	727678	18	Amplification	2.72207
20	43478121	43488299	NM_001184730	PIGT	20	43113497	43841174	1	20q13.12	727678	18	Amplification	2.72207
20	43478121	43488299	NM_015937	PIGT	20	43113497	43841174	1	20q13.12	727678	18	Amplification	2.72207
20	43531808	43543587	NM_006103	WFDC2	20	43113497	43841174	1	20q13.12	727678	18	Amplification	2.72207
20	43574515	43577679	NM_006652	SPINT3	20	43113497	43841174	1	20q13.12	727678	18	Amplification	2.72207
20	43596250	43601549	NM_080827	WFDC6	20	43113497	43841174	1	20q13.12	727678	18	Amplification	2.72207
20	43598333	43609480	NM_001198986	SPINLW1-WFDC6	20	43113497	43841174	1	20q13.12	727678	18	Amplification	2.72207
20	43602679	43609480	NM_020398	SPINLW1	20	43113497	43841174	1	20q13.12	727678	18	Amplification	2.72207
20	43602679	43608431	NM_181502	SPINLW1	20	43113497	43841174	1	20q13.12	727678	18	Amplification	2.72207
20	43613205	43641380	NM_181510	WFDC8	20	43113497	43841174	1	20q13.12	727678	18	Amplification	2.72207
20	43613815	43641380	NM_130896	WFDC8	20	43113497	43841174	1	20q13.12	727678	18	Amplification	2.72207
20	43669992	43693322	NM_147198	WFDC9	20	43113497	43841174	1	20q13.12	727678	18	Amplification	2.72207
20	43691799	43693246	NM_080753	WFDC10A	20	43113497	43841174	1	20q13.12	727678	18	Amplification	2.72207
20	43710616	43732293	NM_147197	WFDC11	20	43113497	43841174	1	20q13.12	727678	18	Amplification	2.72207
20	43746704	43767073	NM_172006	WFDC10B	20	43113497	43841174	1	20q13.12	727678	18	Amplification	2.72207
20	43746704	43767073	NM_172131	WFDC10B	20	43113497	43841174	1	20q13.12	727678	18	Amplification	2.72207
20	43764069	43770871	NM_172005	WFDC13	20	43113497	43841174	1	20q13.12	727678	18	Amplification	2.72207
20	43784402	43787750	NM_178455	SPINT4	20	43113497	43841174	1	20q13.12	727678	18	Amplification	2.72207
20	43836254	43853955	NM_080614	WFDC3	20	43113497	43841174	0.277991	20q13.12	727678	18	Amplification	2.72207
20	44771686	44798393	NM_030777	SLC2A10	20	44795537	45097515	0.106972	20q13.12	301979	18	Amplification	2.71878
20	44956670	45250900	NM_005244	EYA2	20	44795537	45097515	0.478692	20q13.12	301979	18	Amplification	2.71878
20	44956670	45250900	NM_172110	EYA2	20	44795537	45097515	0.478692	20q13.12	301979	18	Amplification	2.71878
20	46422061	46432789	NR_026958	LOC284749	20	46384174	49826093	1	20q13.13 - 20q13.2	3441920	18	Amplification	2.72469
20	46674200	46877828	NM_020820	PREX1	20	46384174	49826093	1	20q13.13 - 20q13.2	3441920	18	Amplification	2.72469
20	46971682	47086638	NM_006420	ARFGEF2	20	46384174	49826093	1	20q13.13 - 20q13.2	3441920	18	Amplification	2.72469
20	47096245	47146894	NM_001316	CSE1L	20	46384174	49826093	1	20q13.13 - 20q13.2	3441920	18	Amplification	2.72469
20	47163283	47238312	NM_001037328	STAU1	20	46384174	49826093	1	20q13.13 - 20q13.2	3441920	18	Amplification	2.72469
20	47163283	47238312	NM_004602	STAU1	20	46384174	49826093	1	20q13.13 - 20q13.2	3441920	18	Amplification	2.72469
20	47163283	47238312	NM_017452	STAU1	20	46384174	49826093	1	20q13.13 - 20q13.2	3441920	18	Amplification	2.72469
20	47163283	47238312	NM_017453	STAU1	20	46384174	49826093	1	20q13.13 - 20q13.2	3441920	18	Amplification	2.72469
20	47163283	47238312	NM_017454	STAU1	20	46384174	49826093	1	20q13.13 - 20q13.2	3441920	18	Amplification	2.72469
20	47269239	47294022	NM_017895	DDX27	20	46384174	49826093	1	20q13.13 - 20q13.2	3441920	18	Amplification	2.72469
20	47295846	47328164	NM_021035	ZNFX1	20	46384174	49826093	1	20q13.13 - 20q13.2	3441920	18	Amplification	2.72469
20	47328122	47339203	NR_003604	NCRNA00275	20	46384174	49826093	1	20q13.13 - 20q13.2	3441920	18	Amplification	2.72469
20	47328122	47339203	NR_003605	NCRNA00275	20	46384174	49826093	1	20q13.13 - 20q13.2	3441920	18	Amplification	2.72469
20	47328122	47339203	NR_003606	NCRNA00275	20	46384174	49826093	1	20q13.13 - 20q13.2	3441920	18	Amplification	2.72469
20	47328122	47339203	NR_036658	NCRNA00275	20	46384174	49826093	1	20q13.13 - 20q13.2	3441920	18	Amplification	2.72469
20	47328586	47339203	NR_036659	NCRNA00275	20	46384174	49826093	1	20q13.13 - 20q13.2	3441920	18	Amplification	2.72469
20	47328889	47328968	NR_002433	SNORD12C	20	46384174	49826093	1	20q13.13 - 20q13.2	3441920	18	Amplification	2.72469
20	47330257	47330360	NR_003695	SNORD12B	20	46384174	49826093	1	20q13.13 - 20q13.2	3441920	18	Amplification	2.72469
20	47330627	47330717	NR_003030	SNORD12	20	46384174	49826093	1	20q13.13 - 20q13.2	3441920	18	Amplification	2.72469
20	47421912	47532589	NM_004975	KCNB1	20	46384174	49826093	1	20q13.13 - 20q13.2	3441920	18	Amplification	2.72469
20	47553818	47618115	NM_000961	PTGIS	20	46384174	49826093	1	20q13.13 - 20q13.2	3441920	18	Amplification	2.72469
20	47682890	47763829	NM_004776	B4GALT5	20	46384174	49826093	1	20q13.13 - 20q13.2	3441920	18	Amplification	2.72469
20	47862657	47942180	NM_015266	SLC9A8	20	46384174	49826093	1	20q13.13 - 20q13.2	3441920	18	Amplification	2.72469
20	47953336	47963684	NM_001135773	SPATA2	20	46384174	49826093	1	20q13.13 - 20q13.2	3441920	18	Amplification	2.72469
20	47953336	47965488	NM_006038	SPATA2	20	46384174	49826093	1	20q13.13 - 20q13.2	3441920	18	Amplification	2.72469
20	47986321	48003830	NM_018683	RNF114	20	46384174	49826093	1	20q13.13 - 20q13.2	3441920	18	Amplification	2.72469
20	48032920	48038828	NM_005985	SNAI1	20	46384174	49826093	1	20q13.13 - 20q13.2	3441920	18	Amplification	2.72469
20	48131068	48203743	NM_199203	TMEM189-UBE2V1	20	46384174	49826093	1	20q13.13 - 20q13.2	3441920	18	Amplification	2.72469
20	48131068	48163118	NM_001032288	UBE2V1	20	46384174	49826093	1	20q13.13 - 20q13.2	3441920	18	Amplification	2.72469
20	48131068	48165902	NM_021988	UBE2V1	20	46384174	49826093	1	20q13.13 - 20q13.2	3441920	18	Amplification	2.72469
20	48131068	48165899	NM_022442	UBE2V1	20	46384174	49826093	1	20q13.13 - 20q13.2	3441920	18	Amplification	2.72469
20	48131068	48165902	NM_199144	UBE2V1	20	46384174	49826093	1	20q13.13 - 20q13.2	3441920	18	Amplification	2.72469
20	48173681	48203743	NM_001162505	TMEM189	20	46384174	49826093	1	20q13.13 - 20q13.2	3441920	18	Amplification	2.72469
20	48173681	48203743	NM_199129	TMEM189	20	46384174	49826093	1	20q13.13 - 20q13.2	3441920	18	Amplification	2.72469
20	48173681	48203743	NR_027889	TMEM189	20	46384174	49826093	1	20q13.13 - 20q13.2	3441920	18	Amplification	2.72469
20	48240783	48242620	NM_005194	CEBPB	20	46384174	49826093	1	20q13.13 - 20q13.2	3441920	18	Amplification	2.72469
20	48342664	48364864	NR_034124	LOC284751	20	46384174	49826093	1	20q13.13 - 20q13.2	3441920	18	Amplification	2.72469
20	48560298	48634494	NM_002827	PTPN1	20	46384174	49826093	1	20q13.13 - 20q13.2	3441920	18	Amplification	2.72469
20	48635730	48635824	NR_030375	MIR645	20	46384174	49826093	1	20q13.13 - 20q13.2	3441920	18	Amplification	2.72469
20	48636053	48686834	NM_080829	FAM65C	20	46384174	49826093	1	20q13.13 - 20q13.2	3441920	18	Amplification	2.72469
20	48781488	48803686	NM_032521	PARD6B	20	46384174	49826093	1	20q13.13 - 20q13.2	3441920	18	Amplification	2.72469
20	48844874	48927122	NM_001010974	BCAS4	20	46384174	49826093	1	20q13.13 - 20q13.2	3441920	18	Amplification	2.72469
20	48844874	48927122	NM_017843	BCAS4	20	46384174	49826093	1	20q13.13 - 20q13.2	3441920	18	Amplification	2.72469
20	48844874	48927122	NM_198799	BCAS4	20	46384174	49826093	1	20q13.13 - 20q13.2	3441920	18	Amplification	2.72469
20	48940290	48980935	NM_015339	ADNP	20	46384174	49826093	1	20q13.13 - 20q13.2	3441920	18	Amplification	2.72469
20	48940290	48980935	NM_181442	ADNP	20	46384174	49826093	1	20q13.13 - 20q13.2	3441920	18	Amplification	2.72469
20	48984812	49008468	NM_003859	DPM1	20	46384174	49826093	1	20q13.13 - 20q13.2	3441920	18	Amplification	2.72469
20	49008770	49011228	NM_014484	MOCS3	20	46384174	49826093	1	20q13.13 - 20q13.2	3441920	18	Amplification	2.72469
20	49053600	49073083	NM_002237	KCNG1	20	46384174	49826093	1	20q13.13 - 20q13.2	3441920	18	Amplification	2.72469
20	49441172	49612576	NM_001136021	NFATC2	20	46384174	49826093	1	20q13.13 - 20q13.2	3441920	18	Amplification	2.72469
20	49441172	49592666	NM_012340	NFATC2	20	46384174	49826093	1	20q13.13 - 20q13.2	3441920	18	Amplification	2.72469
20	49441172	49592666	NM_173091	NFATC2	20	46384174	49826093	1	20q13.13 - 20q13.2	3441920	18	Amplification	2.72469
20	49502849	49502922	NR_036162	MIR3194	20	46384174	49826093	1	20q13.13 - 20q13.2	3441920	18	Amplification	2.72469
20	49646721	49818316	NM_006045	ATP9A	20	46384174	49826093	1	20q13.13 - 20q13.2	3441920	18	Amplification	2.72469
20	51617017	51633044	NM_006526	ZNF217	20	51589469	52123812	1	20q13.2	534344	18	Amplification	2.73355
20	51924447	51925656	NR_002189	SUMO1P1	20	51589469	52123812	1	20q13.2	534344	18	Amplification	2.73355
20	51993486	52120712	NM_003657	BCAS1	20	51589469	52123812	1	20q13.2	534344	18	Amplification	2.73355
20	54005903	54013420	NM_080617	CBLN4	20	53984784	54198709	1	20q13.2	213926	18	Amplification	2.79056
20	39464584	39680548	NM_032221	CHD6	20	39468069	39893173	0.983863	20q12	425105	17	Amplification	2.7345
20	40134806	41251972	NM_007050	PTPRT	20	41234903	41243565	0.00775444	20q13.11	8663	17	Amplification	2.7345
20	40134806	41251972	NM_133170	PTPRT	20	41234903	41243565	0.00775444	20q13.11	8663	17	Amplification	2.7345
20	41569734	41603949	NM_032107	L3MBTL1	20	41533825	43113497	1	20q13.11 - 20q13.12	1579673	17	Amplification	2.7221
20	41576490	41603949	NM_015478	L3MBTL1	20	41533825	43113497	1	20q13.11 - 20q13.12	1579673	17	Amplification	2.7221
20	41621049	41647688	NM_170693	SGK2	20	41533825	43113497	1	20q13.11 - 20q13.12	1579673	17	Amplification	2.7221
20	41627169	41647688	NM_001199264	SGK2	20	41533825	43113497	1	20q13.11 - 20q13.12	1579673	17	Amplification	2.7221
20	41628151	41647688	NM_016276	SGK2	20	41533825	43113497	1	20q13.11 - 20q13.12	1579673	17	Amplification	2.7221
20	41652993	41709277	NM_016004	IFT52	20	41533825	43113497	1	20q13.11 - 20q13.12	1579673	17	Amplification	2.7221
20	41729123	41778537	NM_002466	MYBL2	20	41533825	43113497	1	20q13.11 - 20q13.12	1579673	17	Amplification	2.7221
20	41788215	41789057	NM_001008901	GTSF1L	20	41533825	43113497	1	20q13.11 - 20q13.12	1579673	17	Amplification	2.7221
20	41788215	41789057	NM_176791	GTSF1L	20	41533825	43113497	1	20q13.11 - 20q13.12	1579673	17	Amplification	2.7221
20	41976906	42131669	NM_001098797	TOX2	20	41533825	43113497	1	20q13.11 - 20q13.12	1579673	17	Amplification	2.7221
20	41978196	42131669	NM_001098796	TOX2	20	41533825	43113497	1	20q13.11 - 20q13.12	1579673	17	Amplification	2.7221
20	41978196	42131669	NM_032883	TOX2	20	41533825	43113497	1	20q13.11 - 20q13.12	1579673	17	Amplification	2.7221
20	42007950	42131669	NM_001098798	TOX2	20	41533825	43113497	1	20q13.11 - 20q13.12	1579673	17	Amplification	2.7221
20	42173751	42249633	NM_020433	JPH2	20	41533825	43113497	1	20q13.11 - 20q13.12	1579673	17	Amplification	2.7221
20	42238871	42249633	NM_175913	JPH2	20	41533825	43113497	1	20q13.11 - 20q13.12	1579673	17	Amplification	2.7221
20	42258550	42272846	NM_016470	C20orf111	20	41533825	43113497	1	20q13.11 - 20q13.12	1579673	17	Amplification	2.7221
20	42309322	42342428	NM_024034	GDAP1L1	20	41533825	43113497	1	20q13.11 - 20q13.12	1579673	17	Amplification	2.7221
20	42368611	42373304	NM_001080472	FITM2	20	41533825	43113497	1	20q13.11 - 20q13.12	1579673	17	Amplification	2.7221
20	42399040	42413290	NM_178491	R3HDML	20	41533825	43113497	1	20q13.11 - 20q13.12	1579673	17	Amplification	2.7221
20	42417855	42491726	NM_001030003	HNF4A	20	41533825	43113497	1	20q13.11 - 20q13.12	1579673	17	Amplification	2.7221
20	42417855	42486434	NM_001030004	HNF4A	20	41533825	43113497	1	20q13.11 - 20q13.12	1579673	17	Amplification	2.7221
20	42417855	42491726	NM_175914	HNF4A	20	41533825	43113497	1	20q13.11 - 20q13.12	1579673	17	Amplification	2.7221
20	42463338	42493445	NM_000457	HNF4A	20	41533825	43113497	1	20q13.11 - 20q13.12	1579673	17	Amplification	2.7221
20	42463338	42493445	NM_178849	HNF4A	20	41533825	43113497	1	20q13.11 - 20q13.12	1579673	17	Amplification	2.7221
20	42463338	42486691	NM_178850	HNF4A	20	41533825	43113497	1	20q13.11 - 20q13.12	1579673	17	Amplification	2.7221
20	42470174	42470258	NR_037419	MIR3646	20	41533825	43113497	1	20q13.11 - 20q13.12	1579673	17	Amplification	2.7221
20	42537961	42556659	NM_001039199	TTPAL	20	41533825	43113497	1	20q13.11 - 20q13.12	1579673	17	Amplification	2.7221
20	42537961	42556659	NM_024331	TTPAL	20	41533825	43113497	1	20q13.11 - 20q13.12	1579673	17	Amplification	2.7221
20	42558278	42584141	NM_198941	SERINC3	20	41533825	43113497	1	20q13.11 - 20q13.12	1579673	17	Amplification	2.7221
20	42561315	42584141	NM_006811	SERINC3	20	41533825	43113497	1	20q13.11 - 20q13.12	1579673	17	Amplification	2.7221
20	42593850	42681093	NM_007066	PKIG	20	41533825	43113497	1	20q13.11 - 20q13.12	1579673	17	Amplification	2.7221
20	42593850	42681093	NM_181804	PKIG	20	41533825	43113497	1	20q13.11 - 20q13.12	1579673	17	Amplification	2.7221
20	42593850	42681093	NM_181805	PKIG	20	41533825	43113497	1	20q13.11 - 20q13.12	1579673	17	Amplification	2.7221
20	42681577	42713791	NM_000022	ADA	20	41533825	43113497	1	20q13.11 - 20q13.12	1579673	17	Amplification	2.7221
20	42718507	42733795	NR_034104	LOC79015	20	41533825	43113497	1	20q13.11 - 20q13.12	1579673	17	Amplification	2.7221
20	42777299	42789867	NM_003881	WISP2	20	41533825	43113497	1	20q13.11 - 20q13.12	1579673	17	Amplification	2.7221
20	42807902	42813083	NM_022358	KCNK15	20	41533825	43113497	1	20q13.11 - 20q13.12	1579673	17	Amplification	2.7221
20	42813863	42872327	NM_182970	RIMS4	20	41533825	43113497	1	20q13.11 - 20q13.12	1579673	17	Amplification	2.7221
20	42947758	42970576	NM_003404	YWHAB	20	41533825	43113497	1	20q13.11 - 20q13.12	1579673	17	Amplification	2.7221
20	42947758	42970576	NM_139323	YWHAB	20	41533825	43113497	1	20q13.11 - 20q13.12	1579673	17	Amplification	2.7221
20	42972117	43001377	NM_001124756	PABPC1L	20	41533825	43113497	1	20q13.11 - 20q13.12	1579673	17	Amplification	2.7221
20	43004185	43022529	NM_006809	TOMM34	20	41533825	43113497	1	20q13.11 - 20q13.12	1579673	17	Amplification	2.7221
20	43028534	43142008	NM_006282	STK4	20	41533825	43113497	0.748746	20q13.11 - 20q13.12	1579673	17	Amplification	2.7221
20	43836254	43853955	NM_080614	WFDC3	20	43841174	44795537	0.722065	20q13.12	954364	17	Amplification	2.7221
20	43853983	43873474	NM_052951	DNTTIP1	20	43841174	44795537	1	20q13.12	954364	17	Amplification	2.7221
20	43874662	43879004	NM_007019	UBE2C	20	43841174	44795537	1	20q13.12	954364	17	Amplification	2.7221
20	43874662	43879004	NM_181799	UBE2C	20	43841174	44795537	1	20q13.12	954364	17	Amplification	2.7221
20	43874662	43879004	NM_181800	UBE2C	20	43841174	44795537	1	20q13.12	954364	17	Amplification	2.7221
20	43874662	43879004	NM_181802	UBE2C	20	43841174	44795537	1	20q13.12	954364	17	Amplification	2.7221
20	43874662	43879004	NM_181803	UBE2C	20	43841174	44795537	1	20q13.12	954364	17	Amplification	2.7221
20	43875079	43879004	NM_181801	UBE2C	20	43841174	44795537	1	20q13.12	954364	17	Amplification	2.7221
20	43885262	43889361	NM_003279	TNNC2	20	43841174	44795537	1	20q13.12	954364	17	Amplification	2.7221
20	43895877	43905322	NM_001042632	SNX21	20	43841174	44795537	1	20q13.12	954364	17	Amplification	2.7221
20	43895877	43905322	NM_001042633	SNX21	20	43841174	44795537	1	20q13.12	954364	17	Amplification	2.7221
20	43895877	43905322	NM_033421	SNX21	20	43841174	44795537	1	20q13.12	954364	17	Amplification	2.7221
20	43895877	43905322	NM_152897	SNX21	20	43841174	44795537	1	20q13.12	954364	17	Amplification	2.7221
20	43903767	43919456	NM_005469	ACOT8	20	43841174	44795537	1	20q13.12	954364	17	Amplification	2.7221
20	43919627	43941177	NM_080752	ZSWIM3	20	43841174	44795537	1	20q13.12	954364	17	Amplification	2.7221
20	43919627	43941177	NR_037628	ZSWIM3	20	43841174	44795537	1	20q13.12	954364	17	Amplification	2.7221
20	43943255	43947313	NM_080603	ZSWIM1	20	43841174	44795537	1	20q13.12	954364	17	Amplification	2.7221
20	43948537	43949646	NM_080608	C20orf165	20	43841174	44795537	1	20q13.12	954364	17	Amplification	2.7221
20	43950674	43953309	NM_080749	NEURL2	20	43841174	44795537	1	20q13.12	954364	17	Amplification	2.7221
20	43952998	43960866	NM_000308	CTSA	20	43841174	44795537	1	20q13.12	954364	17	Amplification	2.7221
20	43952998	43960866	NM_001127695	CTSA	20	43841174	44795537	1	20q13.12	954364	17	Amplification	2.7221
20	43952998	43960866	NM_001167594	CTSA	20	43841174	44795537	1	20q13.12	954364	17	Amplification	2.7221
20	43960804	43974194	NM_006227	PLTP	20	43841174	44795537	1	20q13.12	954364	17	Amplification	2.7221
20	43960804	43974194	NM_182676	PLTP	20	43841174	44795537	1	20q13.12	954364	17	Amplification	2.7221
20	43996724	44010070	NM_022104	PCIF1	20	43841174	44795537	1	20q13.12	954364	17	Amplification	2.7221
20	44010699	44034241	NM_022095	ZNF335	20	43841174	44795537	1	20q13.12	954364	17	Amplification	2.7221
20	44070954	44078608	NM_004994	MMP9	20	43841174	44795537	1	20q13.12	954364	17	Amplification	2.7221
20	44083736	44122197	NM_001134771	SLC12A5	20	43841174	44795537	1	20q13.12	954364	17	Amplification	2.7221
20	44091228	44122197	NM_020708	SLC12A5	20	43841174	44795537	1	20q13.12	954364	17	Amplification	2.7221
20	44123033	44151988	NM_020967	NCOA5	20	43841174	44795537	1	20q13.12	954364	17	Amplification	2.7221
20	44180313	44191792	NM_001250	CD40	20	43841174	44795537	1	20q13.12	954364	17	Amplification	2.7221
20	44180313	44191792	NM_152854	CD40	20	43841174	44795537	1	20q13.12	954364	17	Amplification	2.7221
20	44235783	44313742	NM_021248	CDH22	20	43841174	44795537	1	20q13.12	954364	17	Amplification	2.7221
20	44411584	44426472	NM_015945	SLC35C2	20	43841174	44795537	1	20q13.12	954364	17	Amplification	2.7221
20	44411584	44426472	NM_173073	SLC35C2	20	43841174	44795537	1	20q13.12	954364	17	Amplification	2.7221
20	44411584	44426472	NM_173179	SLC35C2	20	43841174	44795537	1	20q13.12	954364	17	Amplification	2.7221
20	44428097	44468679	NM_133171	ELMO2	20	43841174	44795537	1	20q13.12	954364	17	Amplification	2.7221
20	44428097	44468679	NM_182764	ELMO2	20	43841174	44795537	1	20q13.12	954364	17	Amplification	2.7221
20	44525706	44527339	NR_026640	LOC100240726	20	43841174	44795537	1	20q13.12	954364	17	Amplification	2.7221
20	44563114	44575602	NM_018102	ZNF334	20	43841174	44795537	1	20q13.12	954364	17	Amplification	2.7221
20	44563114	44575602	NM_199441	ZNF334	20	43841174	44795537	1	20q13.12	954364	17	Amplification	2.7221
20	44602992	44612621	NM_080721	C20orf123	20	43841174	44795537	1	20q13.12	954364	17	Amplification	2.7221
20	44619869	44746532	NM_001011554	SLC13A3	20	43841174	44795537	1	20q13.12	954364	17	Amplification	2.7221
20	44619869	44713508	NM_001193339	SLC13A3	20	43841174	44795537	1	20q13.12	954364	17	Amplification	2.7221
20	44619869	44746532	NM_001193340	SLC13A3	20	43841174	44795537	1	20q13.12	954364	17	Amplification	2.7221
20	44619869	44713508	NM_001193342	SLC13A3	20	43841174	44795537	1	20q13.12	954364	17	Amplification	2.7221
20	44619869	44713508	NM_022829	SLC13A3	20	43841174	44795537	1	20q13.12	954364	17	Amplification	2.7221
20	44746411	44751684	NM_033550	TP53RK	20	43841174	44795537	1	20q13.12	954364	17	Amplification	2.7221
20	44771686	44798393	NM_030777	SLC2A10	20	43841174	44795537	0.893066	20q13.12	954364	17	Amplification	2.7221
20	54257195	54258279	NM_019888	MC3R	20	54198709	54358315	1	20q13.2	159607	17	Amplification	2.77421
20	33823337	34001703	NM_016436	PHF20	20	33886908	34983846	0.643594	20q11.22 - 20q11.23	1096939	16	Amplification	2.7264
20	34004960	34005843	NM_016558	SCAND1	20	33886908	34983846	1	20q11.22 - 20q11.23	1096939	16	Amplification	2.7264
20	34004960	34005843	NM_033630	SCAND1	20	33886908	34983846	1	20q11.22 - 20q11.23	1096939	16	Amplification	2.7264
20	34019943	34082037	NM_080834	C20orf152	20	33886908	34983846	1	20q11.22 - 20q11.23	1096939	16	Amplification	2.7264
20	34096954	34102297	NR_027451	LOC647979	20	33886908	34983846	1	20q11.22 - 20q11.23	1096939	16	Amplification	2.7264
20	34163762	34284136	NM_177996	EPB41L1	20	33886908	34983846	1	20q11.22 - 20q11.23	1096939	16	Amplification	2.7264
20	34206076	34284136	NM_012156	EPB41L1	20	33886908	34983846	1	20q11.22 - 20q11.23	1096939	16	Amplification	2.7264
20	34287861	34308268	NM_015511	C20orf4	20	33886908	34983846	1	20q11.22 - 20q11.23	1096939	16	Amplification	2.7264
20	34428858	34590455	NM_014902	DLGAP4	20	33886908	34983846	1	20q11.22 - 20q11.23	1096939	16	Amplification	2.7264
20	34523256	34590455	NM_001042486	DLGAP4	20	33886908	34983846	1	20q11.22 - 20q11.23	1096939	16	Amplification	2.7264
20	34523556	34590455	NM_183006	DLGAP4	20	33886908	34983846	1	20q11.22 - 20q11.23	1096939	16	Amplification	2.7264
20	34603311	34611641	NM_006097	MYL9	20	33886908	34983846	1	20q11.22 - 20q11.23	1096939	16	Amplification	2.7264
20	34603311	34611641	NM_181526	MYL9	20	33886908	34983846	1	20q11.22 - 20q11.23	1096939	16	Amplification	2.7264
20	34635290	34655770	NM_001199513	TGIF2	20	33886908	34983846	1	20q11.22 - 20q11.23	1096939	16	Amplification	2.7264
20	34635290	34655770	NM_001199514	TGIF2	20	33886908	34983846	1	20q11.22 - 20q11.23	1096939	16	Amplification	2.7264
20	34635424	34655770	NM_021809	TGIF2	20	33886908	34983846	1	20q11.22 - 20q11.23	1096939	16	Amplification	2.7264
20	34636371	34655770	NM_001199515	TGIF2	20	33886908	34983846	1	20q11.22 - 20q11.23	1096939	16	Amplification	2.7264
20	34636371	34674375	NM_001199535	TGIF2-C20ORF24	20	33886908	34983846	1	20q11.22 - 20q11.23	1096939	16	Amplification	2.7264
20	34667551	34674375	NM_001199534	C20orf24	20	33886908	34983846	1	20q11.22 - 20q11.23	1096939	16	Amplification	2.7264
20	34667551	34674375	NM_018840	C20orf24	20	33886908	34983846	1	20q11.22 - 20q11.23	1096939	16	Amplification	2.7264
20	34667551	34674375	NM_199483	C20orf24	20	33886908	34983846	1	20q11.22 - 20q11.23	1096939	16	Amplification	2.7264
20	34667551	34674375	NR_026562	C20orf24	20	33886908	34983846	1	20q11.22 - 20q11.23	1096939	16	Amplification	2.7264
20	34674336	34707973	NM_032214	SLA2	20	33886908	34983846	1	20q11.22 - 20q11.23	1096939	16	Amplification	2.7264
20	34674336	34707973	NM_175077	SLA2	20	33886908	34983846	1	20q11.22 - 20q11.23	1096939	16	Amplification	2.7264
20	34713583	34807896	NM_022477	NDRG3	20	33886908	34983846	1	20q11.22 - 20q11.23	1096939	16	Amplification	2.7264
20	34713583	34807896	NM_032013	NDRG3	20	33886908	34983846	1	20q11.22 - 20q11.23	1096939	16	Amplification	2.7264
20	34813608	34835645	NM_001145315	DSN1	20	33886908	34983846	1	20q11.22 - 20q11.23	1096939	16	Amplification	2.7264
20	34813608	34835569	NM_001145316	DSN1	20	33886908	34983846	1	20q11.22 - 20q11.23	1096939	16	Amplification	2.7264
20	34813608	34835645	NM_001145317	DSN1	20	33886908	34983846	1	20q11.22 - 20q11.23	1096939	16	Amplification	2.7264
20	34813608	34835645	NM_001145318	DSN1	20	33886908	34983846	1	20q11.22 - 20q11.23	1096939	16	Amplification	2.7264
20	34813608	34835569	NM_024918	DSN1	20	33886908	34983846	1	20q11.22 - 20q11.23	1096939	16	Amplification	2.7264
20	34839259	34921691	NM_199181	C20orf117	20	33886908	34983846	1	20q11.22 - 20q11.23	1096939	16	Amplification	2.7264
20	34845592	34925502	NM_080627	C20orf117	20	33886908	34983846	1	20q11.22 - 20q11.23	1096939	16	Amplification	2.7264
20	34937984	34956047	NM_080628	C20orf118	20	33886908	34983846	1	20q11.22 - 20q11.23	1096939	16	Amplification	2.7264
20	34953641	35013661	NM_015474	SAMHD1	20	33886908	34983846	0.503257	20q11.22 - 20q11.23	1096939	16	Amplification	2.7264
20	35579233	35589748	NM_001167820	BLCAP	20	35473272	37346632	1	20q11.23 - 20q12	1873361	16	Amplification	2.72567
20	35579233	35589549	NM_001167821	BLCAP	20	35473272	37346632	1	20q11.23 - 20q12	1873361	16	Amplification	2.72567
20	35579233	35589498	NM_001167822	BLCAP	20	35473272	37346632	1	20q11.23 - 20q12	1873361	16	Amplification	2.72567
20	35579233	35586368	NM_001167823	BLCAP	20	35473272	37346632	1	20q11.23 - 20q12	1873361	16	Amplification	2.72567
20	35579233	35589748	NM_006698	BLCAP	20	35473272	37346632	1	20q11.23 - 20q12	1873361	16	Amplification	2.72567
20	35583021	35585505	NM_005386	NNAT	20	35473272	37346632	1	20q11.23 - 20q12	1873361	16	Amplification	2.72567
20	35583021	35585505	NM_181689	NNAT	20	35473272	37346632	1	20q11.23 - 20q12	1873361	16	Amplification	2.72567
20	35755848	35933935	NM_030877	CTNNBL1	20	35473272	37346632	1	20q11.23 - 20q12	1873361	16	Amplification	2.72567
20	35964913	36007162	NM_080607	VSTM2L	20	35473272	37346632	1	20q11.23 - 20q12	1873361	16	Amplification	2.72567
20	36044837	36095248	NM_014657	TTI1	20	35473272	37346632	1	20q11.23 - 20q12	1873361	16	Amplification	2.72567
20	36095362	36154181	NM_021215	RPRD1B	20	35473272	37346632	1	20q11.23 - 20q12	1873361	16	Amplification	2.72567
20	36190278	36227115	NM_004613	TGM2	20	35473272	37346632	1	20q11.23 - 20q12	1873361	16	Amplification	2.72567
20	36199765	36227115	NM_198951	TGM2	20	35473272	37346632	1	20q11.23 - 20q12	1873361	16	Amplification	2.72567
20	36272321	36322589	NM_001029864	KIAA1755	20	35473272	37346632	1	20q11.23 - 20q12	1873361	16	Amplification	2.72567
20	36365966	36399320	NM_001725	BPI	20	35473272	37346632	1	20q11.23 - 20q12	1873361	16	Amplification	2.72567
20	36408299	36439068	NM_004139	LBP	20	35473272	37346632	1	20q11.23 - 20q12	1873361	16	Amplification	2.72567
20	36482653	36497433	NR_027241	LOC388796	20	35473272	37346632	1	20q11.23 - 20q12	1873361	16	Amplification	2.72567
20	36482681	36497377	NR_015366	LOC388796	20	35473272	37346632	1	20q11.23 - 20q12	1873361	16	Amplification	2.72567
20	36487257	36487393	NR_002910	SNORA71B	20	35473272	37346632	1	20q11.23 - 20q12	1873361	16	Amplification	2.72567
20	36489363	36489501	NR_002911	SNORA71A	20	35473272	37346632	1	20q11.23 - 20q12	1873361	16	Amplification	2.72567
20	36491724	36491862	NR_003017	SNORA71C	20	35473272	37346632	1	20q11.23 - 20q12	1873361	16	Amplification	2.72567
20	36495919	36496057	NR_003018	SNORA71D	20	35473272	37346632	1	20q11.23 - 20q12	1873361	16	Amplification	2.72567
20	36508711	36512979	NR_003239	SNHG11	20	35473272	37346632	1	20q11.23 - 20q12	1873361	16	Amplification	2.72567
20	36510140	36510276	NR_002972	SNORA39	20	35473272	37346632	1	20q11.23 - 20q12	1873361	16	Amplification	2.72567
20	36511426	36511562	NR_002986	SNORA60	20	35473272	37346632	1	20q11.23 - 20q12	1873361	16	Amplification	2.72567
20	36534900	36640919	NM_020336	RALGAPB	20	35473272	37346632	1	20q11.23 - 20q12	1873361	16	Amplification	2.72567
20	36643252	36650519	NM_001018082	ADIG	20	35473272	37346632	1	20q11.23 - 20q12	1873361	16	Amplification	2.72567
20	36663991	36712710	NM_001164431	ARHGAP40	20	35473272	37346632	1	20q11.23 - 20q12	1873361	16	Amplification	2.72567
20	36786519	36791430	NM_080552	SLC32A1	20	35473272	37346632	1	20q11.23 - 20q12	1873361	16	Amplification	2.72567
20	36810511	36834504	NM_024855	ACTR5	20	35473272	37346632	1	20q11.23 - 20q12	1873361	16	Amplification	2.72567
20	36867762	36985082	NM_001172735	PPP1R16B	20	35473272	37346632	1	20q11.23 - 20q12	1873361	16	Amplification	2.72567
20	36867762	36985082	NM_015568	PPP1R16B	20	35473272	37346632	1	20q11.23 - 20q12	1873361	16	Amplification	2.72567
20	36988369	37015118	NM_030919	FAM83D	20	35473272	37346632	1	20q11.23 - 20q12	1873361	16	Amplification	2.72567
20	37024395	37101781	NM_001190809	DHX35	20	35473272	37346632	1	20q11.23 - 20q12	1873361	16	Amplification	2.72567
20	37024395	37101781	NM_021931	DHX35	20	35473272	37346632	1	20q11.23 - 20q12	1873361	16	Amplification	2.72567
20	37024395	37101781	NR_033905	DHX35	20	35473272	37346632	1	20q11.23 - 20q12	1873361	16	Amplification	2.72567
20	37275838	37286806	NR_027124	LOC339568	20	35473272	37346632	1	20q11.23 - 20q12	1873361	16	Amplification	2.72567
20	38747931	38751291	NM_005461	MAFB	20	38612750	39468069	1	20q12	855320	16	Amplification	2.72603
20	39090876	39186541	NM_003286	TOP1	20	38612750	39468069	1	20q12	855320	16	Amplification	2.72603
20	39199575	39237772	NM_002660	PLCG1	20	38612750	39468069	1	20q12	855320	16	Amplification	2.72603
20	39199575	39237772	NM_182811	PLCG1	20	38612750	39468069	1	20q12	855320	16	Amplification	2.72603
20	39240503	39362154	NM_015035	ZHX3	20	38612750	39468069	1	20q12	855320	16	Amplification	2.72603
20	39402974	39422637	NM_022896	LPIN3	20	38612750	39468069	1	20q12	855320	16	Amplification	2.72603
20	39422020	39428913	NM_052846	EMILIN3	20	38612750	39468069	1	20q12	855320	16	Amplification	2.72603
20	39464584	39680548	NM_032221	CHD6	20	38612750	39468069	0.0161415	20q12	855320	16	Amplification	2.72603
20	40134806	41251972	NM_007050	PTPRT	20	41243565	41533825	0.00752618	20q13.11	290261	16	Amplification	2.72603
20	40134806	41251972	NM_133170	PTPRT	20	41243565	41533825	0.00752618	20q13.11	290261	16	Amplification	2.72603
20	41519918	41525659	NM_006275	SRSF6	20	41243565	41533825	1	20q13.11	290261	16	Amplification	2.72603
20	41519918	41525659	NR_034009	SRSF6	20	41243565	41533825	1	20q13.11	290261	16	Amplification	2.72603
20	54367390	54377126	NM_080821	C20orf108	20	54358315	57487233	1	20q13.2 - 20q13.32	3128919	16	Amplification	2.74668
20	54377852	54400759	NM_003600	AURKA	20	54358315	57487233	1	20q13.2 - 20q13.32	3128919	16	Amplification	2.74668
20	54377852	54400759	NM_198433	AURKA	20	54358315	57487233	1	20q13.2 - 20q13.32	3128919	16	Amplification	2.74668
20	54377852	54400759	NM_198434	AURKA	20	54358315	57487233	1	20q13.2 - 20q13.32	3128919	16	Amplification	2.74668
20	54377852	54400759	NM_198435	AURKA	20	54358315	57487233	1	20q13.2 - 20q13.32	3128919	16	Amplification	2.74668
20	54377852	54400759	NM_198436	AURKA	20	54358315	57487233	1	20q13.2 - 20q13.32	3128919	16	Amplification	2.74668
20	54377852	54400759	NM_198437	AURKA	20	54358315	57487233	1	20q13.2 - 20q13.32	3128919	16	Amplification	2.74668
20	54400834	54412990	NM_001033521	CSTF1	20	54358315	57487233	1	20q13.2 - 20q13.32	3128919	16	Amplification	2.74668
20	54400981	54412990	NM_001324	CSTF1	20	54358315	57487233	1	20q13.2 - 20q13.32	3128919	16	Amplification	2.74668
20	54401114	54412990	NM_001033522	CSTF1	20	54358315	57487233	1	20q13.2 - 20q13.32	3128919	16	Amplification	2.74668
20	54420575	54467804	NM_001164116	CASS4	20	54358315	57487233	1	20q13.2 - 20q13.32	3128919	16	Amplification	2.74668
20	54420721	54467804	NM_001164114	CASS4	20	54358315	57487233	1	20q13.2 - 20q13.32	3128919	16	Amplification	2.74668
20	54420721	54467804	NM_001164115	CASS4	20	54358315	57487233	1	20q13.2 - 20q13.32	3128919	16	Amplification	2.74668
20	54420721	54467804	NM_020356	CASS4	20	54358315	57487233	1	20q13.2 - 20q13.32	3128919	16	Amplification	2.74668
20	54477054	54527350	NM_016407	C20orf43	20	54358315	57487233	1	20q13.2 - 20q13.32	3128919	16	Amplification	2.74668
20	54499955	54534389	NM_080615	GCNT7	20	54358315	57487233	1	20q13.2 - 20q13.32	3128919	16	Amplification	2.74668
20	54533192	54534616	NM_001012971	C20orf106	20	54358315	57487233	1	20q13.2 - 20q13.32	3128919	16	Amplification	2.74668
20	54541709	54544984	NM_001013646	C20orf107	20	54358315	57487233	1	20q13.2 - 20q13.32	3128919	16	Amplification	2.74668
20	54637765	54647746	NM_003222	TFAP2C	20	54358315	57487233	1	20q13.2 - 20q13.32	3128919	16	Amplification	2.74668
20	55177216	55275115	NM_001719	BMP7	20	54358315	57487233	1	20q13.2 - 20q13.32	3128919	16	Amplification	2.74668
20	55329965	55330055	NR_036219	MIR4325	20	54358315	57487233	1	20q13.2 - 20q13.32	3128919	16	Amplification	2.74668
20	55338238	55352457	NM_012444	SPO11	20	54358315	57487233	1	20q13.2 - 20q13.32	3128919	16	Amplification	2.74668
20	55338238	55352457	NM_198265	SPO11	20	54358315	57487233	1	20q13.2 - 20q13.32	3128919	16	Amplification	2.74668
20	55359552	55386927	NM_003610	RAE1	20	54358315	57487233	1	20q13.2 - 20q13.32	3128919	16	Amplification	2.74668
20	55360025	55386927	NM_001015885	RAE1	20	54358315	57487233	1	20q13.2 - 20q13.32	3128919	16	Amplification	2.74668
20	55366903	55368286	NM_001190472	MTRNR2L3	20	54358315	57487233	1	20q13.2 - 20q13.32	3128919	16	Amplification	2.74668
20	55399870	55417793	NM_017495	RBM38	20	54358315	57487233	1	20q13.2 - 20q13.32	3128919	16	Amplification	2.74668
20	55399870	55417793	NM_183425	RBM38	20	54358315	57487233	1	20q13.2 - 20q13.32	3128919	16	Amplification	2.74668
20	55505630	55533561	NM_080618	CTCFL	20	54358315	57487233	1	20q13.2 - 20q13.32	3128919	16	Amplification	2.74668
20	55569543	55574920	NM_002591	PCK1	20	54358315	57487233	1	20q13.2 - 20q13.32	3128919	16	Amplification	2.74668
20	55612308	55629039	NM_001160417	ZBP1	20	54358315	57487233	1	20q13.2 - 20q13.32	3128919	16	Amplification	2.74668
20	55612308	55629039	NM_001160418	ZBP1	20	54358315	57487233	1	20q13.2 - 20q13.32	3128919	16	Amplification	2.74668
20	55612308	55629039	NM_030776	ZBP1	20	54358315	57487233	1	20q13.2 - 20q13.32	3128919	16	Amplification	2.74668
20	55621353	55629039	NM_001160419	ZBP1	20	54358315	57487233	1	20q13.2 - 20q13.32	3128919	16	Amplification	2.74668
20	55656858	55718438	NM_020182	PMEPA1	20	54358315	57487233	1	20q13.2 - 20q13.32	3128919	16	Amplification	2.74668
20	55656858	55719032	NM_199169	PMEPA1	20	54358315	57487233	1	20q13.2 - 20q13.32	3128919	16	Amplification	2.74668
20	55656858	55719032	NM_199170	PMEPA1	20	54358315	57487233	1	20q13.2 - 20q13.32	3128919	16	Amplification	2.74668
20	55656858	55719948	NM_199171	PMEPA1	20	54358315	57487233	1	20q13.2 - 20q13.32	3128919	16	Amplification	2.74668
20	56159389	56169590	NM_178456	C20orf85	20	54358315	57487233	1	20q13.2 - 20q13.32	3128919	16	Amplification	2.74668
20	56241239	56317902	NR_003505	PPP4R1L	20	54358315	57487233	1	20q13.2 - 20q13.32	3128919	16	Amplification	2.74668
20	56318177	56375970	NM_020673	RAB22A	20	54358315	57487233	1	20q13.2 - 20q13.32	3128919	16	Amplification	2.74668
20	56397581	56459563	NM_001195677	VAPB	20	54358315	57487233	1	20q13.2 - 20q13.32	3128919	16	Amplification	2.74668
20	56397581	56459563	NM_004738	VAPB	20	54358315	57487233	1	20q13.2 - 20q13.32	3128919	16	Amplification	2.74668
20	56397581	56459563	NR_036633	VAPB	20	54358315	57487233	1	20q13.2 - 20q13.32	3128919	16	Amplification	2.74668
20	56467832	56523356	NM_153360	APCDD1L	20	54358315	57487233	1	20q13.2 - 20q13.32	3128919	16	Amplification	2.74668
20	56523841	56628356	NR_034147	LOC149773	20	54358315	57487233	1	20q13.2 - 20q13.32	3128919	16	Amplification	2.74668
20	56659734	56687989	NM_001001433	STX16	20	54358315	57487233	1	20q13.2 - 20q13.32	3128919	16	Amplification	2.74668
20	56659734	56687989	NM_001134772	STX16	20	54358315	57487233	1	20q13.2 - 20q13.32	3128919	16	Amplification	2.74668
20	56659734	56687989	NM_001134773	STX16	20	54358315	57487233	1	20q13.2 - 20q13.32	3128919	16	Amplification	2.74668
20	56659734	56687989	NM_003763	STX16	20	54358315	57487233	1	20q13.2 - 20q13.32	3128919	16	Amplification	2.74668
20	56701268	56724308	NM_024663	NPEPL1	20	54358315	57487233	1	20q13.2 - 20q13.32	3128919	16	Amplification	2.74668
20	56826065	56826145	NR_029844	MIR296	20	54358315	57487233	1	20q13.2 - 20q13.32	3128919	16	Amplification	2.74668
20	56826676	56826764	NR_030580	MIR298	20	54358315	57487233	1	20q13.2 - 20q13.32	3128919	16	Amplification	2.74668
20	56827368	56859354	NR_002785	GNAS-AS	20	54358315	57487233	1	20q13.2 - 20q13.32	3128919	16	Amplification	2.74668
20	56848190	56919646	NM_016592	GNAS	20	54358315	57487233	1	20q13.2 - 20q13.32	3128919	16	Amplification	2.74668
20	56861431	56919646	NM_001077490	GNAS	20	54358315	57487233	1	20q13.2 - 20q13.32	3128919	16	Amplification	2.74668
20	56861431	56919646	NM_080425	GNAS	20	54358315	57487233	1	20q13.2 - 20q13.32	3128919	16	Amplification	2.74668
20	56897575	56919643	NR_003259	GNAS	20	54358315	57487233	1	20q13.2 - 20q13.32	3128919	16	Amplification	2.74668
20	56899820	56919646	NM_001077489	GNAS	20	54358315	57487233	1	20q13.2 - 20q13.32	3128919	16	Amplification	2.74668
20	56899821	56919646	NM_000516	GNAS	20	54358315	57487233	1	20q13.2 - 20q13.32	3128919	16	Amplification	2.74668
20	56899821	56919646	NM_080426	GNAS	20	54358315	57487233	1	20q13.2 - 20q13.32	3128919	16	Amplification	2.74668
20	56900164	56919646	NM_001077488	GNAS	20	54358315	57487233	1	20q13.2 - 20q13.32	3128919	16	Amplification	2.74668
20	56989706	57003584	NM_198976	TH1L	20	54358315	57487233	1	20q13.2 - 20q13.32	3128919	16	Amplification	2.74668
20	57003637	57015705	NM_001336	CTSZ	20	54358315	57487233	1	20q13.2 - 20q13.32	3128919	16	Amplification	2.74668
20	57027704	57035105	NM_030773	TUBB1	20	54358315	57487233	1	20q13.2 - 20q13.32	3128919	16	Amplification	2.74668
20	57037128	57040818	NM_001001977	ATP5E	20	54358315	57487233	1	20q13.2 - 20q13.32	3128919	16	Amplification	2.74668
20	57037128	57040796	NM_006886	ATP5E	20	54358315	57487233	1	20q13.2 - 20q13.32	3128919	16	Amplification	2.74668
20	57041595	57051297	NM_016045	SLMO2	20	54358315	57487233	1	20q13.2 - 20q13.32	3128919	16	Amplification	2.74668
20	57199470	57267563	NM_178457	ZNF831	20	54358315	57487233	1	20q13.2 - 20q13.32	3128919	16	Amplification	2.74668
20	57308894	57334443	NM_000114	EDN3	20	54358315	57487233	1	20q13.2 - 20q13.32	3128919	16	Amplification	2.74668
20	57308894	57334443	NM_207032	EDN3	20	54358315	57487233	1	20q13.2 - 20q13.32	3128919	16	Amplification	2.74668
20	57308894	57334443	NM_207033	EDN3	20	54358315	57487233	1	20q13.2 - 20q13.32	3128919	16	Amplification	2.74668
20	57308894	57334443	NM_207034	EDN3	20	54358315	57487233	1	20q13.2 - 20q13.32	3128919	16	Amplification	2.74668
20	29354676	29360050	NM_001037731	DEFB116	20	29327363	29514061	1	20q11.21	186699	15	Amplification	2.74639
20	29420082	29425367	NM_054112	DEFB118	20	29327363	29514061	1	20q11.21	186699	15	Amplification	2.74639
20	29428628	29442068	NM_153289	DEFB119	20	29327363	29514061	1	20q11.21	186699	15	Amplification	2.74639
20	29428628	29442068	NM_173460	DEFB119	20	29327363	29514061	1	20q11.21	186699	15	Amplification	2.74639
20	29440432	29442068	NM_153323	DEFB119	20	29327363	29514061	1	20q11.21	186699	15	Amplification	2.74639
20	29456309	29457731	NM_001011878	DEFB121	20	29327363	29514061	1	20q11.21	186699	15	Amplification	2.74639
20	29456309	29464303	NM_001171832	DEFB121	20	29327363	29514061	1	20q11.21	186699	15	Amplification	2.74639
20	29472903	29480639	NR_002577	DEFB122	20	29327363	29514061	1	20q11.21	186699	15	Amplification	2.74639
20	29492072	29501722	NM_153324	DEFB123	20	29327363	29514061	1	20q11.21	186699	15	Amplification	2.74639
20	31459424	31495360	NM_003098	SNTA1	20	31468154	33886908	0.757075	20q11.21 - 20q11.22	2418755	15	Amplification	2.71211
20	31541589	31701499	NM_001032999	CBFA2T2	20	31468154	33886908	1	20q11.21 - 20q11.22	2418755	15	Amplification	2.71211
20	31613832	31701499	NM_001039709	CBFA2T2	20	31468154	33886908	1	20q11.21 - 20q11.22	2418755	15	Amplification	2.71211
20	31613832	31701499	NM_005093	CBFA2T2	20	31468154	33886908	1	20q11.21 - 20q11.22	2418755	15	Amplification	2.71211
20	31708554	31725926	NM_031231	NECAB3	20	31468154	33886908	1	20q11.21 - 20q11.22	2418755	15	Amplification	2.71211
20	31708554	31725926	NM_031232	NECAB3	20	31468154	33886908	1	20q11.21 - 20q11.22	2418755	15	Amplification	2.71211
20	31713753	31715383	NM_080825	C20orf144	20	31468154	33886908	1	20q11.21 - 20q11.22	2418755	15	Amplification	2.71211
20	31717965	31719993	NM_001024675	C20orf134	20	31468154	33886908	1	20q11.21 - 20q11.22	2418755	15	Amplification	2.71211
20	31726953	31737872	NM_005225	E2F1	20	31468154	33886908	1	20q11.21 - 20q11.22	2418755	15	Amplification	2.71211
20	31754211	31771798	NM_007238	PXMP4	20	31468154	33886908	1	20q11.21 - 20q11.22	2418755	15	Amplification	2.71211
20	31754211	31771798	NM_183397	PXMP4	20	31468154	33886908	1	20q11.21 - 20q11.22	2418755	15	Amplification	2.71211
20	31783469	31843737	NM_032819	ZNF341	20	31468154	33886908	1	20q11.21 - 20q11.22	2418755	15	Amplification	2.71211
20	31862771	31905835	NM_176812	CHMP4B	20	31468154	33886908	1	20q11.21 - 20q11.22	2418755	15	Amplification	2.71211
20	32045393	32131729	NM_007367	RALY	20	31468154	33886908	1	20q11.21 - 20q11.22	2418755	15	Amplification	2.71211
20	32045393	32131729	NM_016732	RALY	20	31468154	33886908	1	20q11.21 - 20q11.22	2418755	15	Amplification	2.71211
20	32139776	32163747	NM_003908	EIF2S2	20	31468154	33886908	1	20q11.21 - 20q11.22	2418755	15	Amplification	2.71211
20	32311832	32320810	NM_001672	ASIP	20	31468154	33886908	1	20q11.21 - 20q11.22	2418755	15	Amplification	2.71211
20	32331732	32354877	NM_000687	AHCY	20	31468154	33886908	1	20q11.21 - 20q11.22	2418755	15	Amplification	2.71211
20	32331732	32363270	NM_001161766	AHCY	20	31468154	33886908	1	20q11.21 - 20q11.22	2418755	15	Amplification	2.71211
20	32414723	32562859	NM_031483	ITCH	20	31468154	33886908	1	20q11.21 - 20q11.22	2418755	15	Amplification	2.71211
20	32517791	32517885	NR_030374	MIR644	20	31468154	33886908	1	20q11.21 - 20q11.22	2418755	15	Amplification	2.71211
20	32567865	32592424	NM_014183	DYNLRB1	20	31468154	33886908	1	20q11.21 - 20q11.22	2418755	15	Amplification	2.71211
20	32598353	32611811	NM_181509	MAP1LC3A	20	31468154	33886908	1	20q11.21 - 20q11.22	2418755	15	Amplification	2.71211
20	32610180	32611811	NM_032514	MAP1LC3A	20	31468154	33886908	1	20q11.21 - 20q11.22	2418755	15	Amplification	2.71211
20	32612007	32728751	NM_080476	PIGU	20	31468154	33886908	1	20q11.21 - 20q11.22	2418755	15	Amplification	2.71211
20	32755809	32764899	NM_021202	TP53INP2	20	31468154	33886908	1	20q11.21 - 20q11.22	2418755	15	Amplification	2.71211
20	32766239	32877095	NM_014071	NCOA6	20	31468154	33886908	1	20q11.21 - 20q11.22	2418755	15	Amplification	2.71211
20	32885039	32885927	NR_002165	HMGB3P1	20	31468154	33886908	1	20q11.21 - 20q11.22	2418755	15	Amplification	2.71211
20	32896184	32924323	NM_178026	GGT7	20	31468154	33886908	1	20q11.21 - 20q11.22	2418755	15	Amplification	2.71211
20	32926427	32979431	NR_028046	ACSS2	20	31468154	33886908	1	20q11.21 - 20q11.22	2418755	15	Amplification	2.71211
20	32927989	32979431	NM_001076552	ACSS2	20	31468154	33886908	1	20q11.21 - 20q11.22	2418755	15	Amplification	2.71211
20	32927989	32979431	NM_018677	ACSS2	20	31468154	33886908	1	20q11.21 - 20q11.22	2418755	15	Amplification	2.71211
20	32979897	33007263	NM_000178	GSS	20	31468154	33886908	1	20q11.21 - 20q11.22	2418755	15	Amplification	2.71211
20	33007365	33053902	NM_020884	MYH7B	20	31468154	33886908	1	20q11.21 - 20q11.22	2418755	15	Amplification	2.71211
20	33041840	33041962	NR_030223	MIR499	20	31468154	33886908	1	20q11.21 - 20q11.22	2418755	15	Amplification	2.71211
20	33053868	33144280	NM_015638	TRPC4AP	20	31468154	33886908	1	20q11.21 - 20q11.22	2418755	15	Amplification	2.71211
20	33053868	33144280	NM_199368	TRPC4AP	20	31468154	33886908	1	20q11.21 - 20q11.22	2418755	15	Amplification	2.71211
20	33166821	33198823	NM_001145025	EDEM2	20	31468154	33886908	1	20q11.21 - 20q11.22	2418755	15	Amplification	2.71211
20	33166821	33198823	NM_018217	EDEM2	20	31468154	33886908	1	20q11.21 - 20q11.22	2418755	15	Amplification	2.71211
20	33166821	33198823	NR_026728	EDEM2	20	31468154	33886908	1	20q11.21 - 20q11.22	2418755	15	Amplification	2.71211
20	33223435	33228827	NM_006404	PROCR	20	31468154	33886908	1	20q11.21 - 20q11.22	2418755	15	Amplification	2.71211
20	33278117	33328219	NM_006690	MMP24	20	31468154	33886908	1	20q11.21 - 20q11.22	2418755	15	Amplification	2.71211
20	33330139	33336009	NM_002212	EIF6	20	31468154	33886908	1	20q11.21 - 20q11.22	2418755	15	Amplification	2.71211
20	33330139	33336009	NM_181466	EIF6	20	31468154	33886908	1	20q11.21 - 20q11.22	2418755	15	Amplification	2.71211
20	33330139	33335921	NM_181468	EIF6	20	31468154	33886908	1	20q11.21 - 20q11.22	2418755	15	Amplification	2.71211
20	33336948	33343640	NM_178468	FAM83C	20	31468154	33886908	1	20q11.21 - 20q11.22	2418755	15	Amplification	2.71211
20	33353783	33463360	NM_001184977	UQCC	20	31468154	33886908	1	20q11.21 - 20q11.22	2418755	15	Amplification	2.71211
20	33353783	33463360	NM_018244	UQCC	20	31468154	33886908	1	20q11.21 - 20q11.22	2418755	15	Amplification	2.71211
20	33353783	33463360	NM_199487	UQCC	20	31468154	33886908	1	20q11.21 - 20q11.22	2418755	15	Amplification	2.71211
20	33484563	33489442	NM_000557	GDF5	20	31468154	33886908	1	20q11.21 - 20q11.22	2418755	15	Amplification	2.71211
20	33506637	33563218	NM_007186	CEP250	20	31468154	33886908	1	20q11.21 - 20q11.22	2418755	15	Amplification	2.71211
20	33571984	33580896	NR_026933	C20orf173	20	31468154	33886908	1	20q11.21 - 20q11.22	2418755	15	Amplification	2.71211
20	33578213	33580896	NM_001145350	C20orf173	20	31468154	33886908	1	20q11.21 - 20q11.22	2418755	15	Amplification	2.71211
20	33593192	33608820	NM_015966	ERGIC3	20	31468154	33886908	1	20q11.21 - 20q11.22	2418755	15	Amplification	2.71211
20	33593192	33608820	NM_198398	ERGIC3	20	31468154	33886908	1	20q11.21 - 20q11.22	2418755	15	Amplification	2.71211
20	33609921	33658899	NR_024377	FER1L4	20	31468154	33886908	1	20q11.21 - 20q11.22	2418755	15	Amplification	2.71211
20	33667223	33672380	NM_003116	SPAG4	20	31468154	33886908	1	20q11.21 - 20q11.22	2418755	15	Amplification	2.71211
20	33677367	33716293	NM_001198863	CPNE1	20	31468154	33886908	1	20q11.21 - 20q11.22	2418755	15	Amplification	2.71211
20	33677367	33705246	NM_003915	CPNE1	20	31468154	33886908	1	20q11.21 - 20q11.22	2418755	15	Amplification	2.71211
20	33677367	33716293	NM_152925	CPNE1	20	31468154	33886908	1	20q11.21 - 20q11.22	2418755	15	Amplification	2.71211
20	33677367	33716293	NM_152926	CPNE1	20	31468154	33886908	1	20q11.21 - 20q11.22	2418755	15	Amplification	2.71211
20	33677367	33716293	NM_152927	CPNE1	20	31468154	33886908	1	20q11.21 - 20q11.22	2418755	15	Amplification	2.71211
20	33677367	33716293	NM_152928	CPNE1	20	31468154	33886908	1	20q11.21 - 20q11.22	2418755	15	Amplification	2.71211
20	33677367	33716274	NR_037188	CPNE1	20	31468154	33886908	1	20q11.21 - 20q11.22	2418755	15	Amplification	2.71211
20	33677380	33716263	NM_152929	CPNE1	20	31468154	33886908	1	20q11.21 - 20q11.22	2418755	15	Amplification	2.71211
20	33677380	33716263	NM_152930	CPNE1	20	31468154	33886908	1	20q11.21 - 20q11.22	2418755	15	Amplification	2.71211
20	33677380	33716263	NM_152931	CPNE1	20	31468154	33886908	1	20q11.21 - 20q11.22	2418755	15	Amplification	2.71211
20	33700261	33716293	NM_001198838	RBM12	20	31468154	33886908	1	20q11.21 - 20q11.22	2418755	15	Amplification	2.71211
20	33700261	33716293	NM_001198840	RBM12	20	31468154	33886908	1	20q11.21 - 20q11.22	2418755	15	Amplification	2.71211
20	33700261	33716293	NM_006047	RBM12	20	31468154	33886908	1	20q11.21 - 20q11.22	2418755	15	Amplification	2.71211
20	33700261	33716293	NM_152838	RBM12	20	31468154	33886908	1	20q11.21 - 20q11.22	2418755	15	Amplification	2.71211
20	33720024	33750702	NM_001198989	NFS1	20	31468154	33886908	1	20q11.21 - 20q11.22	2418755	15	Amplification	2.71211
20	33720024	33750702	NM_021100	NFS1	20	31468154	33886908	1	20q11.21 - 20q11.22	2418755	15	Amplification	2.71211
20	33720024	33750702	NR_037570	NFS1	20	31468154	33886908	1	20q11.21 - 20q11.22	2418755	15	Amplification	2.71211
20	33750646	33752317	NM_080748	ROMO1	20	31468154	33886908	1	20q11.21 - 20q11.22	2418755	15	Amplification	2.71211
20	33754945	33793608	NM_004902	RBM39	20	31468154	33886908	1	20q11.21 - 20q11.22	2418755	15	Amplification	2.71211
20	33754945	33793608	NM_184234	RBM39	20	31468154	33886908	1	20q11.21 - 20q11.22	2418755	15	Amplification	2.71211
20	33823337	34001703	NM_016436	PHF20	20	31468154	33886908	0.356411	20q11.21 - 20q11.22	2418755	15	Amplification	2.71211
20	34953641	35013661	NM_015474	SAMHD1	20	34983846	35473272	0.496759	20q11.23	489427	15	Amplification	2.71596
20	35059592	35157825	NM_002895	RBL1	20	34983846	35473272	1	20q11.23	489427	15	Amplification	2.71596
20	35065391	35157825	NM_183404	RBL1	20	34983846	35473272	1	20q11.23	489427	15	Amplification	2.71596
20	35163043	35241389	NM_152503	C20orf132	20	34983846	35473272	1	20q11.23	489427	15	Amplification	2.71596
20	35190638	35241389	NM_213631	C20orf132	20	34983846	35473272	1	20q11.23	489427	15	Amplification	2.71596
20	35190638	35241389	NM_213632	C20orf132	20	34983846	35473272	1	20q11.23	489427	15	Amplification	2.71596
20	35240870	35303440	NM_001135771	RPN2	20	34983846	35473272	1	20q11.23	489427	15	Amplification	2.71596
20	35240870	35303440	NM_002951	RPN2	20	34983846	35473272	1	20q11.23	489427	15	Amplification	2.71596
20	35312904	35318714	NM_001184731	GHRH	20	34983846	35473272	1	20q11.23	489427	15	Amplification	2.71596
20	35312904	35318714	NM_021081	GHRH	20	34983846	35473272	1	20q11.23	489427	15	Amplification	2.71596
20	35351465	35379078	NM_001003897	MANBAL	20	34983846	35473272	1	20q11.23	489427	15	Amplification	2.71596
20	35351465	35379078	NM_022077	MANBAL	20	34983846	35473272	1	20q11.23	489427	15	Amplification	2.71596
20	35406502	35467236	NM_005417	SRC	20	34983846	35473272	1	20q11.23	489427	15	Amplification	2.71596
20	35407971	35467236	NM_198291	SRC	20	34983846	35473272	1	20q11.23	489427	15	Amplification	2.71596
20	59983249	60074262	NM_003185	TAF4	20	59988404	61018455	0.94336	20q13.33	1030052	15	Amplification	2.74047
20	60130912	60143830	NM_144703	LSM14B	20	59988404	61018455	1	20q13.33	1030052	15	Amplification	2.74047
20	60145186	60151870	NM_002792	PSMA7	20	59988404	61018455	1	20q13.33	1030052	15	Amplification	2.74047
20	60152217	60190962	NM_198935	SS18L1	20	59988404	61018455	1	20q13.33	1030052	15	Amplification	2.74047
20	60191476	60211206	NM_015666	GTPBP5	20	59988404	61018455	1	20q13.33	1030052	15	Amplification	2.74047
20	60223412	60228719	NM_007232	HRH3	20	59988404	61018455	1	20q13.33	1030052	15	Amplification	2.74047
20	60246975	60304665	NM_014835	OSBPL2	20	59988404	61018455	1	20q13.33	1030052	15	Amplification	2.74047
20	60246975	60304665	NM_144498	OSBPL2	20	59988404	61018455	1	20q13.33	1030052	15	Amplification	2.74047
20	60311422	60317314	NM_007002	ADRM1	20	59988404	61018455	1	20q13.33	1030052	15	Amplification	2.74047
20	60311422	60317314	NM_175573	ADRM1	20	59988404	61018455	1	20q13.33	1030052	15	Amplification	2.74047
20	60317516	60375764	NM_005560	LAMA5	20	59988404	61018455	1	20q13.33	1030052	15	Amplification	2.74047
20	60395516	60396972	NM_001024	RPS21	20	59988404	61018455	1	20q13.33	1030052	15	Amplification	2.74047
20	60397081	60415735	NM_031215	CABLES2	20	59988404	61018455	1	20q13.33	1030052	15	Amplification	2.74047
20	60418688	60436025	NM_080833	C20orf151	20	59988404	61018455	1	20q13.33	1030052	15	Amplification	2.74047
20	60471948	60484422	NM_080473	GATA5	20	59988404	61018455	1	20q13.33	1030052	15	Amplification	2.74047
20	60551883	60559214	NR_033263	C20orf200	20	59988404	61018455	1	20q13.33	1030052	15	Amplification	2.74047
20	60558105	60578417	NM_178463	C20orf166	20	59988404	61018455	1	20q13.33	1030052	15	Amplification	2.74047
20	60561958	60562029	NR_029780	MIR1-1	20	59988404	61018455	1	20q13.33	1030052	15	Amplification	2.74047
20	60572564	60572666	NR_029676	MIR133A2	20	59988404	61018455	1	20q13.33	1030052	15	Amplification	2.74047
20	60744242	60774093	NM_016354	SLCO4A1	20	59988404	61018455	1	20q13.33	1030052	15	Amplification	2.74047
20	60764824	60768419	NR_024470	LOC100127888	20	59988404	61018455	1	20q13.33	1030052	15	Amplification	2.74047
20	60810634	60864569	NM_002531	NTSR1	20	59988404	61018455	1	20q13.33	1030052	15	Amplification	2.74047
20	60898250	60902391	NM_018270	C20orf20	20	59988404	61018455	1	20q13.33	1030052	15	Amplification	2.74047
20	60906622	60915798	NM_007346	OGFR	20	59988404	61018455	1	20q13.33	1030052	15	Amplification	2.74047
20	60918859	60942957	NM_001853	COL9A3	20	59988404	61018455	1	20q13.33	1030052	15	Amplification	2.74047
20	60942912	60963561	NM_006602	TCFL5	20	59988404	61018455	1	20q13.33	1030052	15	Amplification	2.74047
20	60946921	60947989	NM_080750	DPH3P1	20	59988404	61018455	1	20q13.33	1030052	15	Amplification	2.74047
20	60979535	61028349	NM_001193369	DIDO1	20	59988404	61018455	0.797316	20q13.33	1030052	15	Amplification	2.74047
20	60979535	61039750	NM_033081	DIDO1	20	59988404	61018455	0.646356	20q13.33	1030052	15	Amplification	2.74047
20	60989012	61028349	NM_001193370	DIDO1	20	59988404	61018455	0.748487	20q13.33	1030052	15	Amplification	2.74047
20	60989012	61039750	NM_080797	DIDO1	20	59988404	61018455	0.580303	20q13.33	1030052	15	Amplification	2.74047
20	61006795	61039750	NM_022105	DIDO1	20	59988404	61018455	0.353835	20q13.33	1030052	15	Amplification	2.74047
20	61006795	61028349	NM_080796	DIDO1	20	59988404	61018455	0.540988	20q13.33	1030052	15	Amplification	2.74047
13	53784108	53784185	NR_031628	MIR1297	13	53061839	53863971	1	13q21.1	802133	15	Amplification	2.926
13	70910099	71339332	NM_004392	DACH1	13	70774666	71334850	0.989558	13q21.33	560185	15	Amplification	2.94086
13	70910099	71339332	NM_004392	DACH1	13	71334850	71398337	0.0104442	13q21.33	63488	15	Amplification	2.86925
13	70910099	71339332	NM_080759	DACH1	13	70774666	71334850	0.989558	13q21.33	560185	15	Amplification	2.94086
13	70910099	71339332	NM_080759	DACH1	13	71334850	71398337	0.0104442	13q21.33	63488	15	Amplification	2.86925
13	70910099	71339332	NM_080760	DACH1	13	70774666	71334850	0.989558	13q21.33	560185	15	Amplification	2.94086
13	70910099	71339332	NM_080760	DACH1	13	71334850	71398337	0.0104442	13q21.33	63488	15	Amplification	2.86925
13	72254231	72488593	NM_006346	PIBF1	13	72305268	73126000	0.782231	13q22.1	820733	15	Amplification	2.85357
13	72531143	72549678	NM_001730	KLF5	13	72305268	73126000	1	13q22.1	820733	15	Amplification	2.85357
20	29516970	29524478	NM_001037500	DEFB124	20	29514061	30352076	1	20q11.21	838016	14	Amplification	2.7203
20	29526766	29536370	NM_014012	REM1	20	29514061	30352076	1	20q11.21	838016	14	Amplification	2.7203
20	29537242	29539039	NR_024358	NCRNA00028	20	29514061	30352076	1	20q11.21	838016	14	Amplification	2.7203
20	29565902	29621032	NM_030789	HM13	20	29514061	30352076	1	20q11.21	838016	14	Amplification	2.7203
20	29565902	29621032	NM_178580	HM13	20	29514061	30352076	1	20q11.21	838016	14	Amplification	2.7203
20	29565902	29621032	NM_178581	HM13	20	29514061	30352076	1	20q11.21	838016	14	Amplification	2.7203
20	29565902	29591258	NM_178582	HM13	20	29514061	30352076	1	20q11.21	838016	14	Amplification	2.7203
20	29598846	29599681	NR_003677	PSIMCT-1	20	29514061	30352076	1	20q11.21	838016	14	Amplification	2.7203
20	29656753	29657975	NM_002165	ID1	20	29514061	30352076	1	20q11.21	838016	14	Amplification	2.7203
20	29656753	29657975	NM_181353	ID1	20	29514061	30352076	1	20q11.21	838016	14	Amplification	2.7203
20	29658650	29658705	NR_036161	MIR3193	20	29514061	30352076	1	20q11.21	838016	14	Amplification	2.7203
20	29689352	29696462	NM_032609	COX4I2	20	29514061	30352076	1	20q11.21	838016	14	Amplification	2.7203
20	29715922	29774318	NM_001191	BCL2L1	20	29514061	30352076	1	20q11.21	838016	14	Amplification	2.7203
20	29715922	29774318	NM_138578	BCL2L1	20	29514061	30352076	1	20q11.21	838016	14	Amplification	2.7203
20	29790565	29853265	NM_012112	TPX2	20	29514061	30352076	1	20q11.21	838016	14	Amplification	2.7203
20	29870839	29886162	NM_033118	MYLK2	20	29514061	30352076	1	20q11.21	838016	14	Amplification	2.7203
20	29895764	29897082	NM_004118	FOXS1	20	29514061	30352076	1	20q11.21	838016	14	Amplification	2.7203
20	29912531	29921463	NM_001012644	DUSP15	20	29514061	30352076	1	20q11.21	838016	14	Amplification	2.7203
20	29912531	29922141	NM_080611	DUSP15	20	29514061	30352076	1	20q11.21	838016	14	Amplification	2.7203
20	29912531	29921673	NM_177991	DUSP15	20	29514061	30352076	1	20q11.21	838016	14	Amplification	2.7203
20	29922166	29994520	NM_001008409	TTLL9	20	29514061	30352076	1	20q11.21	838016	14	Amplification	2.7203
20	29996419	30003545	NM_030815	PDRG1	20	29514061	30352076	1	20q11.21	838016	14	Amplification	2.7203
20	30019466	30049918	NM_001011718	XKR7	20	29514061	30352076	1	20q11.21	838016	14	Amplification	2.7203
20	30061906	30083646	NM_080625	C20orf160	20	29514061	30352076	1	20q11.21	838016	14	Amplification	2.7203
20	30103652	30153319	NM_001172129	HCK	20	29514061	30352076	1	20q11.21	838016	14	Amplification	2.7203
20	30103652	30153319	NM_001172130	HCK	20	29514061	30352076	1	20q11.21	838016	14	Amplification	2.7203
20	30103652	30153319	NM_001172131	HCK	20	29514061	30352076	1	20q11.21	838016	14	Amplification	2.7203
20	30103652	30153319	NM_001172132	HCK	20	29514061	30352076	1	20q11.21	838016	14	Amplification	2.7203
20	30103652	30153319	NM_001172133	HCK	20	29514061	30352076	1	20q11.21	838016	14	Amplification	2.7203
20	30103652	30153319	NM_002110	HCK	20	29514061	30352076	1	20q11.21	838016	14	Amplification	2.7203
20	30160970	30218723	NM_014742	TM9SF4	20	29514061	30352076	1	20q11.21	838016	14	Amplification	2.7203
20	30240610	30241825	NR_002781	TSPY26P	20	29514061	30352076	1	20q11.21	838016	14	Amplification	2.7203
20	30243968	30259208	NM_002657	PLAGL2	20	29514061	30352076	1	20q11.21	838016	14	Amplification	2.7203
20	30259357	30290129	NM_015352	POFUT1	20	29514061	30352076	1	20q11.21	838016	14	Amplification	2.7203
20	30259357	30269388	NM_172236	POFUT1	20	29514061	30352076	1	20q11.21	838016	14	Amplification	2.7203
20	30329115	30386473	NM_004798	KIF3B	20	29514061	30352076	0.400321	20q11.21	838016	14	Amplification	2.7203
20	30494523	30534950	NM_080616	C20orf112	20	30494205	31468154	1	20q11.21	973950	14	Amplification	2.72128
20	30638942	30660356	NR_034152	LOC149950	20	30494205	31468154	1	20q11.21	973950	14	Amplification	2.72128
20	30683088	30703445	NM_182584	C20orf203	20	30494205	31468154	1	20q11.21	973950	14	Amplification	2.72128
20	30754154	30795476	NM_001099339	COMMD7	20	30494205	31468154	1	20q11.21	973950	14	Amplification	2.72128
20	30754154	30795476	NM_053041	COMMD7	20	30494205	31468154	1	20q11.21	973950	14	Amplification	2.72128
20	30813852	30860824	NM_006892	DNMT3B	20	30494205	31468154	1	20q11.21	973950	14	Amplification	2.72128
20	30813852	30860824	NM_175848	DNMT3B	20	30494205	31468154	1	20q11.21	973950	14	Amplification	2.72128
20	30813852	30860824	NM_175849	DNMT3B	20	30494205	31468154	1	20q11.21	973950	14	Amplification	2.72128
20	30831319	30860824	NM_175850	DNMT3B	20	30494205	31468154	1	20q11.21	973950	14	Amplification	2.72128
20	30871360	30901873	NM_012325	MAPRE1	20	30494205	31468154	1	20q11.21	973950	14	Amplification	2.72128
20	31035242	31055901	NM_080675	SUN5	20	30494205	31468154	1	20q11.21	973950	14	Amplification	2.72128
20	31059068	31075177	NM_025227	BPIL1	20	30494205	31468154	1	20q11.21	973950	14	Amplification	2.72128
20	31083115	31095515	NM_174897	BPIL3	20	30494205	31468154	1	20q11.21	973950	14	Amplification	2.72128
20	31106891	31125096	NM_182658	C20orf185	20	30494205	31468154	1	20q11.21	973950	14	Amplification	2.72128
20	31132979	31163219	NM_182519	C20orf186	20	30494205	31468154	1	20q11.21	973950	14	Amplification	2.72128
20	31219621	31232885	NM_080574	C20orf70	20	30494205	31468154	1	20q11.21	973950	14	Amplification	2.72128
20	31245072	31261930	NR_026760	BASE	20	30494205	31468154	1	20q11.21	973950	14	Amplification	2.72128
20	31268796	31279221	NM_001042439	C20orf71	20	30494205	31468154	1	20q11.21	973950	14	Amplification	2.72128
20	31268796	31279221	NM_178466	C20orf71	20	30494205	31468154	1	20q11.21	973950	14	Amplification	2.72128
20	31287463	31294777	NM_016583	PLUNC	20	30494205	31468154	1	20q11.21	973950	14	Amplification	2.72128
20	31287463	31294777	NM_130852	PLUNC	20	30494205	31468154	1	20q11.21	973950	14	Amplification	2.72128
20	31334602	31361346	NM_033197	C20orf114	20	30494205	31468154	1	20q11.21	973950	14	Amplification	2.72128
20	31410306	31452999	NM_016082	CDK5RAP1	20	30494205	31468154	1	20q11.21	973950	14	Amplification	2.72128
20	31410306	31452999	NM_016408	CDK5RAP1	20	30494205	31468154	1	20q11.21	973950	14	Amplification	2.72128
20	31459424	31495360	NM_003098	SNTA1	20	30494205	31468154	0.242953	20q11.21	973950	14	Amplification	2.72128
20	57585959	57856162	NM_001199505	PHACTR3	20	57530595	59988404	1	20q13.32 - 20q13.33	2457810	14	Amplification	2.73122
20	57612998	57856162	NM_080672	PHACTR3	20	57530595	59988404	1	20q13.32 - 20q13.33	2457810	14	Amplification	2.73122
20	57685111	57856162	NM_001199506	PHACTR3	20	57530595	59988404	1	20q13.32 - 20q13.33	2457810	14	Amplification	2.73122
20	57729660	57856162	NM_183244	PHACTR3	20	57530595	59988404	1	20q13.32 - 20q13.33	2457810	14	Amplification	2.73122
20	57729660	57856162	NM_183246	PHACTR3	20	57530595	59988404	1	20q13.32 - 20q13.33	2457810	14	Amplification	2.73122
20	57872013	57940605	NM_014258	SYCP2	20	57530595	59988404	1	20q13.32 - 20q13.33	2457810	14	Amplification	2.73122
20	57942214	57957098	NM_001190826	C20orf177	20	57530595	59988404	1	20q13.32 - 20q13.33	2457810	14	Amplification	2.73122
20	57945282	57948748	NM_006242	PPP1R3D	20	57530595	59988404	1	20q13.32 - 20q13.33	2457810	14	Amplification	2.73122
20	57948839	57957098	NM_001190827	C20orf177	20	57530595	59988404	1	20q13.32 - 20q13.33	2457810	14	Amplification	2.73122
20	57948839	57957098	NM_022106	C20orf177	20	57530595	59988404	1	20q13.32 - 20q13.33	2457810	14	Amplification	2.73122
20	57966866	58021564	NM_177980	CDH26	20	57530595	59988404	1	20q13.32 - 20q13.33	2457810	14	Amplification	2.73122
20	58004812	58021564	NM_021810	CDH26	20	57530595	59988404	1	20q13.32 - 20q13.33	2457810	14	Amplification	2.73122
20	58064375	58081404	NM_173644	C20orf197	20	57530595	59988404	1	20q13.32 - 20q13.33	2457810	14	Amplification	2.73122
20	58316927	58317021	NR_030376	MIR646	20	57530595	59988404	1	20q13.32 - 20q13.33	2457810	14	Amplification	2.73122
20	59260954	59945695	NM_001794	CDH4	20	57530595	59988404	1	20q13.32 - 20q13.33	2457810	14	Amplification	2.73122
20	59961997	59962114	NR_031658	MIR1257	20	57530595	59988404	1	20q13.32 - 20q13.33	2457810	14	Amplification	2.73122
20	59983249	60074262	NM_003185	TAF4	20	57530595	59988404	0.0566506	20q13.32 - 20q13.33	2457810	14	Amplification	2.73122
20	60979535	61028349	NM_001193369	DIDO1	20	61018455	62064557	0.202704	20q13.33	1046103	14	Amplification	2.73122
20	60979535	61039750	NM_033081	DIDO1	20	61018455	62064557	0.35366	20q13.33	1046103	14	Amplification	2.73122
20	60989012	61028349	NM_001193370	DIDO1	20	61018455	62064557	0.251538	20q13.33	1046103	14	Amplification	2.73122
20	60989012	61039750	NM_080797	DIDO1	20	61018455	62064557	0.419717	20q13.33	1046103	14	Amplification	2.73122
20	61006795	61039750	NM_022105	DIDO1	20	61018455	62064557	0.646195	20q13.33	1046103	14	Amplification	2.73122
20	61006795	61028349	NM_080796	DIDO1	20	61018455	62064557	0.459058	20q13.33	1046103	14	Amplification	2.73122
20	61039886	61050273	NM_017896	C20orf11	20	61018455	62064557	1	20q13.33	1046103	14	Amplification	2.73122
20	61054444	61070395	NM_022082	SLC17A9	20	61018455	62064557	1	20q13.33	1046103	14	Amplification	2.73122
20	61107776	61108833	NM_080606	BHLHE23	20	61018455	62064557	1	20q13.33	1046103	14	Amplification	2.73122
20	61111180	61186869	NR_033370	LOC63930	20	61018455	62064557	1	20q13.33	1046103	14	Amplification	2.73122
20	61136014	61138826	NR_028295	NCRNA00029	20	61018455	62064557	1	20q13.33	1046103	14	Amplification	2.73122
20	61139808	61155661	NR_033369	LOC100144597	20	61018455	62064557	1	20q13.33	1046103	14	Amplification	2.73122
20	61197290	61204117	NR_003245	HAR1B	20	61018455	62064557	1	20q13.33	1046103	14	Amplification	2.73122
20	61203089	61206183	NR_003244	HAR1A	20	61018455	62064557	1	20q13.33	1046103	14	Amplification	2.73122
20	61280297	61280384	NR_029670	MIR124-3	20	61018455	62064557	1	20q13.33	1046103	14	Amplification	2.73122
20	61297227	61317984	NM_017798	YTHDF1	20	61018455	62064557	1	20q13.33	1046103	14	Amplification	2.73122
20	61337721	61342300	NM_022161	BIRC7	20	61018455	62064557	1	20q13.33	1046103	14	Amplification	2.73122
20	61337721	61342300	NM_139317	BIRC7	20	61018455	62064557	1	20q13.33	1046103	14	Amplification	2.73122
20	61340576	61340640	NR_036163	MIR3196	20	61018455	62064557	1	20q13.33	1046103	14	Amplification	2.73122
20	61342581	61356338	NM_152864	NKAIN4	20	61018455	62064557	1	20q13.33	1046103	14	Amplification	2.73122
20	61355775	61363413	NR_024389	FLJ16779	20	61018455	62064557	1	20q13.33	1046103	14	Amplification	2.73122
20	61374610	61391588	NM_018209	ARFGAP1	20	61018455	62064557	1	20q13.33	1046103	14	Amplification	2.73122
20	61374610	61391588	NM_175609	ARFGAP1	20	61018455	62064557	1	20q13.33	1046103	14	Amplification	2.73122
20	61388605	61388664	NR_036220	MIR4326	20	61018455	62064557	1	20q13.33	1046103	14	Amplification	2.73122
20	61394983	61432730	NM_020882	COL20A1	20	61018455	62064557	1	20q13.33	1046103	14	Amplification	2.73122
20	61445109	61463140	NM_000744	CHRNA4	20	61018455	62064557	1	20q13.33	1046103	14	Amplification	2.73122
20	61507986	61574438	NM_004518	KCNQ2	20	61018455	62064557	1	20q13.33	1046103	14	Amplification	2.73122
20	61507986	61574438	NM_172106	KCNQ2	20	61018455	62064557	1	20q13.33	1046103	14	Amplification	2.73122
20	61507986	61574438	NM_172107	KCNQ2	20	61018455	62064557	1	20q13.33	1046103	14	Amplification	2.73122
20	61507986	61574438	NM_172108	KCNQ2	20	61018455	62064557	1	20q13.33	1046103	14	Amplification	2.73122
20	61535476	61574438	NM_172109	KCNQ2	20	61018455	62064557	1	20q13.33	1046103	14	Amplification	2.73122
20	61589810	61600950	NM_001958	EEF1A2	20	61018455	62064557	1	20q13.33	1046103	14	Amplification	2.73122
20	61622577	61623969	NM_024299	PPDPF	20	61018455	62064557	1	20q13.33	1046103	14	Amplification	2.73122
20	61630220	61639152	NM_005975	PTK6	20	61018455	62064557	1	20q13.33	1046103	14	Amplification	2.73122
20	61642607	61649302	NM_080823	SRMS	20	61018455	62064557	1	20q13.33	1046103	14	Amplification	2.73122
20	61654817	61658480	NM_024059	C20orf195	20	61018455	62064557	1	20q13.33	1046103	14	Amplification	2.73122
20	61659883	61676037	NM_001037335	PRIC285	20	61018455	62064557	1	20q13.33	1046103	14	Amplification	2.73122
20	61659883	61669552	NM_033405	PRIC285	20	61018455	62064557	1	20q13.33	1046103	14	Amplification	2.73122
20	61689399	61728826	NM_012384	GMEB2	20	61018455	62064557	1	20q13.33	1046103	14	Amplification	2.73122
20	61741505	61755225	NM_015894	STMN3	20	61018455	62064557	1	20q13.33	1046103	14	Amplification	2.73122
20	61760091	61798042	NM_016434	RTEL1	20	61018455	62064557	1	20q13.33	1046103	14	Amplification	2.73122
20	61760091	61798046	NM_032957	RTEL1	20	61018455	62064557	1	20q13.33	1046103	14	Amplification	2.73122
20	61796732	61800480	NM_032945	TNFRSF6B	20	61018455	62064557	1	20q13.33	1046103	14	Amplification	2.73122
20	61798465	61800480	NM_003823	TNFRSF6B	20	61018455	62064557	1	20q13.33	1046103	14	Amplification	2.73122
20	61800439	61809800	NM_001134758	ARFRP1	20	61018455	62064557	1	20q13.33	1046103	14	Amplification	2.73122
20	61800439	61809800	NM_003224	ARFRP1	20	61018455	62064557	1	20q13.33	1046103	14	Amplification	2.73122
20	61809238	61837939	NM_001083113	ZGPAT	20	61018455	62064557	1	20q13.33	1046103	14	Amplification	2.73122
20	61809824	61837939	NM_001195653	ZGPAT	20	61018455	62064557	1	20q13.33	1046103	14	Amplification	2.73122
20	61809824	61837939	NM_001195654	ZGPAT	20	61018455	62064557	1	20q13.33	1046103	14	Amplification	2.73122
20	61809824	61837939	NM_032527	ZGPAT	20	61018455	62064557	1	20q13.33	1046103	14	Amplification	2.73122
20	61809824	61837939	NM_181485	ZGPAT	20	61018455	62064557	1	20q13.33	1046103	14	Amplification	2.73122
20	61838422	61840905	NM_017806	LIME1	20	61018455	62064557	1	20q13.33	1046103	14	Amplification	2.73122
20	61841655	61845848	NM_020062	SLC2A4RG	20	61018455	62064557	1	20q13.33	1046103	14	Amplification	2.73122
20	61846322	61907301	NM_025224	ZBTB46	20	61018455	62064557	1	20q13.33	1046103	14	Amplification	2.73122
20	61963010	61964786	NM_080622	ABHD16B	20	61018455	62064557	1	20q13.33	1046103	14	Amplification	2.73122
20	61967034	61993335	NM_003288	TPD52L2	20	61018455	62064557	1	20q13.33	1046103	14	Amplification	2.73122
20	61967034	61993335	NM_199359	TPD52L2	20	61018455	62064557	1	20q13.33	1046103	14	Amplification	2.73122
20	61967034	61993335	NM_199360	TPD52L2	20	61018455	62064557	1	20q13.33	1046103	14	Amplification	2.73122
20	61967034	61993335	NM_199361	TPD52L2	20	61018455	62064557	1	20q13.33	1046103	14	Amplification	2.73122
20	61967034	61993335	NM_199362	TPD52L2	20	61018455	62064557	1	20q13.33	1046103	14	Amplification	2.73122
20	61967034	61993335	NM_199363	TPD52L2	20	61018455	62064557	1	20q13.33	1046103	14	Amplification	2.73122
20	61996899	62037829	NM_025219	DNAJC5	20	61018455	62064557	1	20q13.33	1046103	14	Amplification	2.73122
20	62021222	62021339	NR_030637	MIR941-1	20	61018455	62064557	1	20q13.33	1046103	14	Amplification	2.73122
20	62021278	62021392	NR_030639	MIR941-3	20	61018455	62064557	1	20q13.33	1046103	14	Amplification	2.73122
20	62021294	62021383	NR_030638	MIR941-2	20	61018455	62064557	1	20q13.33	1046103	14	Amplification	2.73122
20	62021334	62021448	NR_030639.1	MIR941-3	20	61018455	62064557	1	20q13.33	1046103	14	Amplification	2.73122
20	62021350	62021439	NR_030638.1	MIR941-2	20	61018455	62064557	1	20q13.33	1046103	14	Amplification	2.73122
20	62021529	62021646	NR_030639.2	MIR941-3	20	61018455	62064557	1	20q13.33	1046103	14	Amplification	2.73122
20	62021545	62021634	NR_030638.2	MIR941-2	20	61018455	62064557	1	20q13.33	1046103	14	Amplification	2.73122
20	62021657	62021746	NR_030638.3	MIR941-2	20	61018455	62064557	1	20q13.33	1046103	14	Amplification	2.73122
20	62041626	62052972	NM_001193379	UCKL1	20	61018455	62064557	1	20q13.33	1046103	14	Amplification	2.73122
20	62041626	62058245	NM_017859	UCKL1	20	61018455	62064557	1	20q13.33	1046103	14	Amplification	2.73122
20	62043262	62043342	NR_031735	MIR1914	20	61018455	62064557	1	20q13.33	1046103	14	Amplification	2.73122
20	62044428	62044524	NR_030377	MIR647	20	61018455	62064557	1	20q13.33	1046103	14	Amplification	2.73122
20	62055181	62058783	NR_027287	UCKL1-AS1	20	61018455	62064557	1	20q13.33	1046103	14	Amplification	2.73122
20	62058499	62071663	NM_020713	ZNF512B	20	61018455	62064557	0.460235	20q13.33	1046103	14	Amplification	2.73122
13	24844209	25493421	NM_016529	ATP8A2	13	25068705	25500147	0.654203	13q12.13	431443	14	Amplification	3.05609
13	25726756	25876570	NM_001260	CDK8	13	25847782	26021381	0.192164	13q12.13	173600	14	Amplification	3.08474
13	26029840	26161083	NM_006646	WASF3	13	26021381	26241605	1	13q12.13	220225	14	Amplification	3.12865
13	26227339	26232923	NM_005288	GPR12	13	26021381	26241605	1	13q12.13	220225	14	Amplification	3.12865
13	26538287	26644034	NM_182488	USP12	13	26577130	27176589	0.632683	13q12.13 - 13q12.2	599460	14	Amplification	3.09526
13	26723692	26728703	NM_000982	RPL21	13	26577130	27176589	1	13q12.13 - 13q12.2	599460	14	Amplification	3.09526
13	26723693	26728700	NR_026911	RPL21P28	13	26577130	27176589	1	13q12.13 - 13q12.2	599460	14	Amplification	3.09526
13	26727201	26727273	NR_002574	SNORD102	13	26577130	27176589	1	13q12.13 - 13q12.2	599460	14	Amplification	3.09526
13	26727538	26727664	NR_002575	SNORA27	13	26577130	27176589	1	13q12.13 - 13q12.2	599460	14	Amplification	3.09526
13	26742464	26745828	NM_206827	RASL11A	13	26577130	27176589	1	13q12.13 - 13q12.2	599460	14	Amplification	3.09526
13	26896681	26907847	NM_002097	GTF3A	13	26577130	27176589	1	13q12.13 - 13q12.2	599460	14	Amplification	3.09526
13	26907776	26922335	NM_001166261	MTIF3	13	26577130	27176589	1	13q12.13 - 13q12.2	599460	14	Amplification	3.09526
13	26907776	26922327	NM_001166262	MTIF3	13	26577130	27176589	1	13q12.13 - 13q12.2	599460	14	Amplification	3.09526
13	26907776	26922740	NM_001166263	MTIF3	13	26577130	27176589	1	13q12.13 - 13q12.2	599460	14	Amplification	3.09526
13	26907776	26922740	NM_152912	MTIF3	13	26577130	27176589	1	13q12.13 - 13q12.2	599460	14	Amplification	3.09526
13	27018050	27092721	NM_153371	LNX2	13	26577130	27176589	1	13q12.13 - 13q12.2	599460	14	Amplification	3.09526
13	27094003	27139549	NM_152705	POLR1D	13	26577130	27176589	1	13q12.13 - 13q12.2	599460	14	Amplification	3.09526
13	27094029	27095586	NM_015972	POLR1D	13	26577130	27176589	1	13q12.13 - 13q12.2	599460	14	Amplification	3.09526
13	56613053	56616075	NM_198441.1	PRR20A	13	56173986	57469383	1	13q21.1	1295398	14	Amplification	2.93479
13	56613053	56616075	NM_001130404.4	PRR20B	13	56173986	57469383	1	13q21.1	1295398	14	Amplification	2.93479
13	56613053	56616075	NM_001130405.4	PRR20C	13	56173986	57469383	1	13q21.1	1295398	14	Amplification	2.93479
13	56613053	56616075	NM_001130406.4	PRR20D	13	56173986	57469383	1	13q21.1	1295398	14	Amplification	2.93479
13	56613053	56616075	NM_001130407	PRR20E	13	56173986	57469383	1	13q21.1	1295398	14	Amplification	2.93479
13	56619623	56622645	NM_198441	PRR20A	13	56173986	57469383	1	13q21.1	1295398	14	Amplification	2.93479
13	56619623	56622645	NM_001130404.3	PRR20B	13	56173986	57469383	1	13q21.1	1295398	14	Amplification	2.93479
13	56619623	56622645	NM_001130405.3	PRR20C	13	56173986	57469383	1	13q21.1	1295398	14	Amplification	2.93479
13	56619623	56622645	NM_001130406.3	PRR20D	13	56173986	57469383	1	13q21.1	1295398	14	Amplification	2.93479
13	56619623	56622645	NM_001130407.3	PRR20E	13	56173986	57469383	1	13q21.1	1295398	14	Amplification	2.93479
13	56626196	56629218	NM_198441.2	PRR20A	13	56173986	57469383	1	13q21.1	1295398	14	Amplification	2.93479
13	56626196	56629218	NM_001130404.1	PRR20B	13	56173986	57469383	1	13q21.1	1295398	14	Amplification	2.93479
13	56626196	56629218	NM_001130405.1	PRR20C	13	56173986	57469383	1	13q21.1	1295398	14	Amplification	2.93479
13	56626196	56629218	NM_001130406.2	PRR20D	13	56173986	57469383	1	13q21.1	1295398	14	Amplification	2.93479
13	56626196	56629218	NM_001130407.4	PRR20E	13	56173986	57469383	1	13q21.1	1295398	14	Amplification	2.93479
13	56632767	56635789	NM_198441.3	PRR20A	13	56173986	57469383	1	13q21.1	1295398	14	Amplification	2.93479
13	56632767	56635789	NM_001130404.2	PRR20B	13	56173986	57469383	1	13q21.1	1295398	14	Amplification	2.93479
13	56632767	56635789	NM_001130405	PRR20C	13	56173986	57469383	1	13q21.1	1295398	14	Amplification	2.93479
13	56632767	56635789	NM_001130406	PRR20D	13	56173986	57469383	1	13q21.1	1295398	14	Amplification	2.93479
13	56632767	56635789	NM_001130407.2	PRR20E	13	56173986	57469383	1	13q21.1	1295398	14	Amplification	2.93479
13	56639332	56642354	NM_198441.4	PRR20A	13	56173986	57469383	1	13q21.1	1295398	14	Amplification	2.93479
13	56639332	56642354	NM_001130404	PRR20B	13	56173986	57469383	1	13q21.1	1295398	14	Amplification	2.93479
13	56639332	56642354	NM_001130405.2	PRR20C	13	56173986	57469383	1	13q21.1	1295398	14	Amplification	2.93479
13	56639332	56642354	NM_001130406.1	PRR20D	13	56173986	57469383	1	13q21.1	1295398	14	Amplification	2.93479
13	56639332	56642354	NM_001130407.1	PRR20E	13	56173986	57469383	1	13q21.1	1295398	14	Amplification	2.93479
13	57103790	57201067	NM_001040429	PCDH17	13	56173986	57469383	1	13q21.1	1295398	14	Amplification	2.93479
13	59137724	59636121	NM_001042517	DIAPH3	13	59138198	61085290	0.999049	13q21.2 - 13q21.31	1947093	14	Amplification	2.80495
13	59246298	59485345	NM_030932	DIAPH3	13	59138198	61085290	1	13q21.2 - 13q21.31	1947093	14	Amplification	2.80495
13	59868592	60046015	NM_001146071	TDRD3	13	59138198	61085290	1	13q21.2 - 13q21.31	1947093	14	Amplification	2.80495
13	59868592	60046015	NM_030794	TDRD3	13	59138198	61085290	1	13q21.2 - 13q21.31	1947093	14	Amplification	2.80495
13	59869428	60046015	NM_001146070	TDRD3	13	59138198	61085290	1	13q21.2 - 13q21.31	1947093	14	Amplification	2.80495
13	60671933	60672016	NR_036128	MIR3169	13	59138198	61085290	1	13q21.2 - 13q21.31	1947093	14	Amplification	2.80495
13	60881820	60887657	NM_022843	PCDH20	13	59138198	61085290	1	13q21.2 - 13q21.31	1947093	14	Amplification	2.80495
13	68241344	68469888	NR_031680.1	MIR548H4	13	67912567	70774666	1	13q21.33	2862100	14	Amplification	2.97138
13	69172726	69580627	NM_020866	KLHL1	13	67912567	70774666	1	13q21.33	2862100	14	Amplification	2.97138
13	69579346	69611887	NR_002717	ATXN8OS	13	67912567	70774666	1	13q21.33	2862100	14	Amplification	2.97138
13	72062977	72111735	NR_031690	MIR548I4	13	71560663	72305268	1	13q21.33 - 13q22.1	744606	14	Amplification	2.85894
13	72180496	72199940	NM_001071775	MZT1	13	71560663	72305268	1	13q21.33 - 13q22.1	744606	14	Amplification	2.85894
13	72200043	72228330	NM_024808	C13orf34	13	71560663	72305268	1	13q21.33 - 13q22.1	744606	14	Amplification	2.85894
13	72227541	72254346	NM_001128226	DIS3	13	71560663	72305268	1	13q21.33 - 13q22.1	744606	14	Amplification	2.85894
13	72227541	72254346	NM_014953	DIS3	13	71560663	72305268	1	13q21.33 - 13q22.1	744606	14	Amplification	2.85894
13	72254231	72488593	NM_006346	PIBF1	13	71560663	72305268	0.217773	13q21.33 - 13q22.1	744606	14	Amplification	2.85894
13	73158150	73606068	NM_007249	KLF12	13	73126000	73747491	1	13q22.1	621492	14	Amplification	2.85894
13	76477390	76499333	NM_012158	FBXL3	13	76482881	78052532	0.749772	13q22.3 - 13q31.1	1569652	14	Amplification	2.869
13	76516793	76799179	NM_015057	MYCBP2	13	76482881	78052532	1	13q22.3 - 13q31.1	1569652	14	Amplification	2.869
13	77007810	77117400	NM_001160706	SCEL	13	76482881	78052532	1	13q22.3 - 13q31.1	1569652	14	Amplification	2.869
13	77007810	77117400	NM_003843	SCEL	13	76482881	78052532	1	13q22.3 - 13q31.1	1569652	14	Amplification	2.869
13	77007810	77117400	NM_144777	SCEL	13	76482881	78052532	1	13q22.3 - 13q31.1	1569652	14	Amplification	2.869
13	77170148	77170253	NR_037438	MIR3665	13	76482881	78052532	1	13q22.3 - 13q31.1	1569652	14	Amplification	2.869
13	77170471	77236379	NM_001040153	SLAIN1	13	76482881	78052532	1	13q22.3 - 13q31.1	1569652	14	Amplification	2.869
13	77213296	77236379	NM_144595	SLAIN1	13	76482881	78052532	1	13q22.3 - 13q31.1	1569652	14	Amplification	2.869
13	77367617	77447666	NM_000115	EDNRB	13	76482881	78052532	1	13q22.3 - 13q31.1	1569652	14	Amplification	2.869
13	77367617	77390968	NM_001122659	EDNRB	13	76482881	78052532	1	13q22.3 - 13q31.1	1569652	14	Amplification	2.869
13	77367617	77390968	NM_003991	EDNRB	13	76482881	78052532	1	13q22.3 - 13q31.1	1569652	14	Amplification	2.869
20	28225540	28247669	NR_003579	FRG1B	20	27739994	29322557	1	20q11.1 - 20q11.21	1582564	13	Amplification	2.73463
20	29309128	29311097	NM_001037730	DEFB115	20	27739994	29322557	1	20q11.1 - 20q11.21	1582564	13	Amplification	2.73463
20	30329115	30386473	NM_004798	KIF3B	20	30352076	30494205	0.599697	20q11.21	142130	13	Amplification	2.71705
20	30409808	30424014	NM_001164603	ASXL1	20	30352076	30494205	1	20q11.21	142130	13	Amplification	2.71705
20	30409808	30490784	NM_015338	ASXL1	20	30352076	30494205	1	20q11.21	142130	13	Amplification	2.71705
20	62058499	62071663	NM_020713	ZNF512B	20	62064557	62380353	0.53984	20q13.33	315797	13	Amplification	2.69748
20	62075910	62081440	NM_080621	SAMD10	20	62064557	62380353	1	20q13.33	315797	13	Amplification	2.69748
20	62082875	62134898	NM_012469	PRPF6	20	62064557	62380353	1	20q13.33	315797	13	Amplification	2.69748
20	62136141	62141760	NR_027686	NCRNA00176	20	62064557	62380353	1	20q13.33	315797	13	Amplification	2.69748
20	62136141	62141760	NR_027687	NCRNA00176	20	62064557	62380353	1	20q13.33	315797	13	Amplification	2.69748
20	62149523	62151424	NM_018419	SOX18	20	62064557	62380353	1	20q13.33	315797	13	Amplification	2.69748
20	62158883	62174145	NM_198723	TCEA2	20	62064557	62380353	1	20q13.33	315797	13	Amplification	2.69748
20	62164454	62174145	NM_003195	TCEA2	20	62064557	62380353	1	20q13.33	315797	13	Amplification	2.69748
20	62174979	62181769	NM_001039467	RGS19	20	62064557	62380353	1	20q13.33	315797	13	Amplification	2.69748
20	62174979	62181290	NM_005873	RGS19	20	62064557	62380353	1	20q13.33	315797	13	Amplification	2.69748
20	62181915	62202441	NM_000913	OPRL1	20	62064557	62380353	1	20q13.33	315797	13	Amplification	2.69748
20	62181915	62202441	NM_182647	OPRL1	20	62064557	62380353	1	20q13.33	315797	13	Amplification	2.69748
20	62185177	62186157	NM_001007125	C20orf201	20	62064557	62380353	1	20q13.33	315797	13	Amplification	2.69748
20	62186813	62202441	NM_001200019	OPRL1	20	62064557	62380353	1	20q13.33	315797	13	Amplification	2.69748
20	62207627	62208629	NM_005286	NPBWR2	20	62064557	62380353	1	20q13.33	315797	13	Amplification	2.69748
20	62266271	62344051	NM_004535	MYT1	20	62064557	62380353	1	20q13.33	315797	13	Amplification	2.69748
20	62357492	62378024	NM_001104925	PCMTD2	20	62064557	62380353	1	20q13.33	315797	13	Amplification	2.69748
20	62357492	62378024	NM_018257	PCMTD2	20	62064557	62380353	1	20q13.33	315797	13	Amplification	2.69748
13	24844209	25493421	NM_016529	ATP8A2	13	24945378	25068705	0.189965	13q12.13	123328	13	Amplification	3.09095
13	25516735	25523199	NM_001007538	SHISA2	13	25500147	25847782	1	13q12.13	347636	13	Amplification	2.90018
13	25684905	25694509	NM_005977	RNF6	13	25500147	25847782	1	13q12.13	347636	13	Amplification	2.90018
13	25684905	25694029	NM_183043	RNF6	13	25500147	25847782	1	13q12.13	347636	13	Amplification	2.90018
13	25684905	25693841	NM_183044	RNF6	13	25500147	25847782	1	13q12.13	347636	13	Amplification	2.90018
13	25726756	25876570	NM_001260	CDK8	13	25500147	25847782	0.807843	13q12.13	347636	13	Amplification	2.90018
13	26538287	26644034	NM_182488	USP12	13	26534701	26577130	0.367326	13q12.13	42430	13	Amplification	2.97282
13	27264780	27266090	NM_145657	GSX1	13	27176589	27527642	1	13q12.2	351054	13	Amplification	2.9969
13	27392168	27398452	NM_000209	PDX1	13	27176589	27527642	1	13q12.2	351054	13	Amplification	2.9969
13	27417343	27417711	NR_002162	ATP5EP2	13	27176589	27527642	1	13q12.2	351054	13	Amplification	2.9969
13	27434278	27441318	NM_001265	CDX2	13	27176589	27527642	1	13q12.2	351054	13	Amplification	2.9969
13	27450243	27460775	NM_001105577	PRHOXNB	13	27176589	27527642	1	13q12.2	351054	13	Amplification	2.9969
13	27475411	27572730	NM_004119	FLT3	13	27176589	27527642	0.536704	13q12.2	351054	13	Amplification	2.9969
13	34414424	35144874	NM_015678	NBEA	13	34745756	34940558	0.266689	13q13.3	194803	13	Amplification	2.82508
13	36316968	36392410	NM_001127217	SMAD9	13	36350737	38511512	0.552391	13q13.3	2160776	13	Amplification	2.75889
13	36316968	36392410	NM_005905	SMAD9	13	36350737	38511512	0.552391	13q13.3	2160776	13	Amplification	2.75889
13	36421908	36471505	NM_001142364	ALG5	13	36350737	38511512	1	13q13.3	2160776	13	Amplification	2.75889
13	36421908	36471505	NM_013338	ALG5	13	36350737	38511512	1	13q13.3	2160776	13	Amplification	2.75889
13	36472678	36481752	NM_181503	EXOSC8	13	36350737	38511512	1	13q13.3	2160776	13	Amplification	2.75889
13	36481451	36531851	NM_001014286	FAM48A	13	36350737	38511512	1	13q13.3	2160776	13	Amplification	2.75889
13	36481451	36531851	NM_017569	FAM48A	13	36350737	38511512	1	13q13.3	2160776	13	Amplification	2.75889
13	36575397	36577802	NM_145203	CSNK1A1L	13	36350737	38511512	1	13q13.3	2160776	13	Amplification	2.75889
13	37034719	37070982	NM_001135934	POSTN	13	36350737	38511512	1	13q13.3	2160776	13	Amplification	2.75889
13	37034719	37070982	NM_001135935	POSTN	13	36350737	38511512	1	13q13.3	2160776	13	Amplification	2.75889
13	37034719	37070982	NM_001135936	POSTN	13	36350737	38511512	1	13q13.3	2160776	13	Amplification	2.75889
13	37034719	37070982	NM_006475	POSTN	13	36350737	38511512	1	13q13.3	2160776	13	Amplification	2.75889
13	37108773	37341940	NM_001135955	TRPC4	13	36350737	38511512	1	13q13.3	2160776	13	Amplification	2.75889
13	37108773	37341940	NM_001135956	TRPC4	13	36350737	38511512	1	13q13.3	2160776	13	Amplification	2.75889
13	37108773	37341940	NM_001135957	TRPC4	13	36350737	38511512	1	13q13.3	2160776	13	Amplification	2.75889
13	37108773	37341940	NM_001135958	TRPC4	13	36350737	38511512	1	13q13.3	2160776	13	Amplification	2.75889
13	37108773	37341940	NM_003306	TRPC4	13	36350737	38511512	1	13q13.3	2160776	13	Amplification	2.75889
13	37108773	37341940	NM_016179	TRPC4	13	36350737	38511512	1	13q13.3	2160776	13	Amplification	2.75889
13	37821942	37835144	NM_016617	UFM1	13	36350737	38511512	1	13q13.3	2160776	13	Amplification	2.75889
13	38159173	38359268	NM_207361	FREM2	13	36350737	38511512	1	13q13.3	2160776	13	Amplification	2.75889
13	38438062	38462997	NM_001144033	STOML3	13	36350737	38511512	1	13q13.3	2160776	13	Amplification	2.75889
13	38438062	38462997	NM_145286	STOML3	13	36350737	38511512	1	13q13.3	2160776	13	Amplification	2.75889
13	38482002	38510253	NM_025138	C13orf23	13	36350737	38511512	1	13q13.3	2160776	13	Amplification	2.75889
13	38482002	38510253	NM_170719	C13orf23	13	36350737	38511512	1	13q13.3	2160776	13	Amplification	2.75889
13	38510455	38522247	NM_001012754	NHLRC3	13	36350737	38511512	0.0897142	13q13.3	2160776	13	Amplification	2.75889
13	38510455	38522247	NM_001017370	NHLRC3	13	36350737	38511512	0.0897142	13q13.3	2160776	13	Amplification	2.75889
13	39127764	39263803	NM_001145079	COG6	13	39122922	39549339	1	13q13.3 - 13q14.11	426418	13	Amplification	2.74571
13	39127764	39224766	NM_020751	COG6	13	39122922	39549339	1	13q13.3 - 13q14.11	426418	13	Amplification	2.74571
13	39127764	39224766	NR_026745	COG6	13	39122922	39549339	1	13q13.3 - 13q14.11	426418	13	Amplification	2.74571
13	39136171	39136273	NR_036190	MIR4305	13	39122922	39549339	1	13q13.3 - 13q14.11	426418	13	Amplification	2.74571
13	59137724	59636121	NM_001042517	DIAPH3	13	58820875	59138198	0.000953054	13q21.2	317324	13	Amplification	2.82642
13	63209569	63214703	NR_002171	OR7E156P	13	61311563	64592641	1	13q21.31 - 13q21.32	3281079	13	Amplification	2.92924
13	74024981	74029259	NR_034024	LOC338864	13	73747491	75073176	1	13q22.1 - 13q22.2	1325686	13	Amplification	2.83996
13	74024981	74029259	NR_034025	LOC338864	13	73747491	75073176	1	13q22.1 - 13q22.2	1325686	13	Amplification	2.83996
13	74709890	74712519	NR_027466	CTAGE11P	13	73747491	75073176	1	13q22.1 - 13q22.2	1325686	13	Amplification	2.83996
13	74756810	74954252	NM_014832	TBC1D4	13	73747491	75073176	1	13q22.1 - 13q22.2	1325686	13	Amplification	2.83996
13	74997351	75009993	NM_203495	COMMD6	13	73747491	75073176	1	13q22.1 - 13q22.2	1325686	13	Amplification	2.83996
13	74997351	75009993	NM_203497	COMMD6	13	73747491	75073176	1	13q22.1 - 13q22.2	1325686	13	Amplification	2.83996
13	75021928	75078070	NM_006002	UCHL3	13	73747491	75073176	0.91283	13q22.1 - 13q22.2	1325686	13	Amplification	2.83996
13	76464060	76474654	NM_006493	CLN5	13	76472449	76482881	0.208211	13q22.3	10433	13	Amplification	2.88665
13	76477390	76499333	NM_012158	FBXL3	13	76472449	76482881	0.250273	13q22.3	10433	13	Amplification	2.88665
13	78071231	78075697	NM_006237	POU4F1	13	78052532	78144485	1	13q31.1	91954	13	Amplification	2.83531
13	78086422	78131316	NM_024546	RNF219	13	78052532	78144485	1	13q31.1	91954	13	Amplification	2.83531
13	78340250	78743320	NR_030317	MIR548A2	13	78206351	79259039	1	13q31.1	1052689	13	Amplification	2.89424
13	78792100	78877925	NM_022118	RBM26	13	78206351	79259039	1	13q31.1	1052689	13	Amplification	2.89424
13	78953260	79028214	NM_001161407	NDFIP2	13	78206351	79259039	1	13q31.1	1052689	13	Amplification	2.89424
13	78953260	79028214	NM_019080	NDFIP2	13	78206351	79259039	1	13q31.1	1052689	13	Amplification	2.89424
13	89681437	89681533	NR_030754	MIR622	13	89310267	90227089	1	13q31.3	916823	13	Amplification	2.92438
13	90341209	90376853	NR_027039	LOC144776	13	90227089	91681217	1	13q31.3	1454129	13	Amplification	2.96047
13	90798075	90804831	NR_027349	MIR17HG	13	90227089	91681217	1	13q31.3	1454129	13	Amplification	2.96047
13	90798075	90804831	NR_027350	MIR17HG	13	90227089	91681217	1	13q31.3	1454129	13	Amplification	2.96047
13	90800860	90800944	NR_029487	MIR17	13	90227089	91681217	1	13q31.3	1454129	13	Amplification	2.96047
13	90801006	90801077	NR_029488	MIR18A	13	90227089	91681217	1	13q31.3	1454129	13	Amplification	2.96047
13	90801146	90801228	NR_029489	MIR19A	13	90227089	91681217	1	13q31.3	1454129	13	Amplification	2.96047
13	90801320	90801391	NR_029492	MIR20A	13	90227089	91681217	1	13q31.3	1454129	13	Amplification	2.96047
13	90801447	90801534	NR_029490	MIR19B1	13	90227089	91681217	1	13q31.3	1454129	13	Amplification	2.96047
13	90801569	90801647	NR_029508	MIR92A1	13	90227089	91681217	1	13q31.3	1454129	13	Amplification	2.96047
13	90848936	92317489	NM_004466	GPC5	13	90227089	91681217	0.566736	13q31.3	1454129	13	Amplification	2.96047
13	90848936	92317489	NM_004466	GPC5	13	91681217	93041183	0.433265	13q31.3	1359967	13	Amplification	2.92367
13	92677079	93858275	NM_005708	GPC6	13	91681217	93041183	0.308251	13q31.3	1359967	13	Amplification	2.92367
8	127633865	127639894	NM_174911	FAM84B	8	126739083	127859176	1	8q24.13 - 8q24.21	1120094	13	Amplification	2.95439
5	42459783	42757684	NM_000163	GHR	5	42443196	42527704	0.228001	5p12	84509	9	Amplification	2.80118
5	42459783	42757684	NM_000163	GHR	5	42565985	42837911	0.6435	5p12	271927	9	Amplification	2.8233
13	24152549	24183924	NM_001185085	ATP12A	13	24125968	24708129	1	13q12.12 - 13q12.13	582162	12	Amplification	2.85826
13	24152549	24183924	NM_001676	ATP12A	13	24125968	24708129	1	13q12.12 - 13q12.13	582162	12	Amplification	2.85826
13	24236301	24352059	NM_001184993	RNF17	13	24125968	24708129	1	13q12.12 - 13q12.13	582162	12	Amplification	2.85826
13	24236301	24352059	NM_031277	RNF17	13	24125968	24708129	1	13q12.12 - 13q12.13	582162	12	Amplification	2.85826
13	24354412	24395086	NM_018451	CENPJ	13	24125968	24708129	1	13q12.12 - 13q12.13	582162	12	Amplification	2.85826
13	24400893	24440608	NR_026730	TPTE2P1	13	24125968	24708129	1	13q12.12 - 13q12.13	582162	12	Amplification	2.85826
13	24568276	24570705	NM_030979	PABPC3	13	24125968	24708129	1	13q12.12 - 13q12.13	582162	12	Amplification	2.85826
13	24640672	24643858	NM_152704	FAM123A	13	24125968	24708129	1	13q12.12 - 13q12.13	582162	12	Amplification	2.85826
13	24640672	24643858	NM_199138	FAM123A	13	24125968	24708129	1	13q12.12 - 13q12.13	582162	12	Amplification	2.85826
13	24718341	24759705	NM_004685	MTMR6	13	24708129	24945378	1	13q12.13	237250	12	Amplification	2.92495
13	24773666	24814562	NM_001008564	NUPL1	13	24708129	24945378	1	13q12.13	237250	12	Amplification	2.92495
13	24773666	24814562	NM_014089	NUPL1	13	24708129	24945378	1	13q12.13	237250	12	Amplification	2.92495
13	24844209	25493421	NM_016529	ATP8A2	13	24708129	24945378	0.155835	13q12.13	237250	12	Amplification	2.92495
13	27475411	27572730	NM_004119	FLT3	13	27527642	27662425	0.463307	13q12.2	134784	12	Amplification	2.96768
13	27608980	27611312	NR_029383	LOC100288730	13	27527642	27662425	1	13q12.2	134784	12	Amplification	2.96768
13	27610643	27767476	NM_175854	PAN3	13	27527642	27662425	0.330177	13q12.2	134784	12	Amplification	2.96768
13	34414424	35144874	NM_015678	NBEA	13	34344016	34745756	0.453601	13q13.2 - 13q13.3	401741	12	Amplification	2.84231
13	34414424	35144874	NM_015678	NBEA	13	34940558	34963856	0.0318967	13q13.3	23299	12	Amplification	2.7978
13	34414424	35144874	NM_015678	NBEA	13	34963856	36350737	0.247818	13q13.3	1386882	12	Amplification	2.74928
13	34945926	34948833	NM_005584	MAB21L1	13	34940558	34963856	1	13q13.3	23299	12	Amplification	2.7978
13	34946406	35413383	NR_031646	MIR548F5	13	34940558	34963856	0.0373701	13q13.3	23299	12	Amplification	2.7978
13	34946406	35413383	NR_031646	MIR548F5	13	34963856	36350737	0.962632	13q13.3	1386882	12	Amplification	2.74928
13	35240790	35327999	NM_001195415	DCLK1	13	34963856	36350737	1	13q13.3	1386882	12	Amplification	2.74928
13	35240790	35327999	NM_001195416	DCLK1	13	34963856	36350737	1	13q13.3	1386882	12	Amplification	2.74928
13	35240790	35603515	NM_004734	DCLK1	13	34963856	36350737	1	13q13.3	1386882	12	Amplification	2.74928
13	35318037	35327999	NM_001195430	DCLK1	13	34963856	36350737	1	13q13.3	1386882	12	Amplification	2.74928
13	35640345	35769993	NM_001198910	C13orf38-SOHLH2	13	34963856	36350737	1	13q13.3	1386882	12	Amplification	2.74928
13	35640345	35686753	NM_017826	SOHLH2	13	34963856	36350737	1	13q13.3	1386882	12	Amplification	2.74928
13	35699179	35769993	NM_001144982	C13orf38	13	34963856	36350737	1	13q13.3	1386882	12	Amplification	2.74928
13	35699179	35769993	NM_001144983	C13orf38	13	34963856	36350737	1	13q13.3	1386882	12	Amplification	2.74928
13	35699179	35769993	NM_001144984	C13orf38	13	34963856	36350737	1	13q13.3	1386882	12	Amplification	2.74928
13	35699179	35769993	NM_001198908	C13orf38	13	34963856	36350737	1	13q13.3	1386882	12	Amplification	2.74928
13	35702912	35769993	NM_001144981	C13orf38	13	34963856	36350737	1	13q13.3	1386882	12	Amplification	2.74928
13	35702912	35769993	NM_001144985	C13orf38	13	34963856	36350737	1	13q13.3	1386882	12	Amplification	2.74928
13	35702912	35769993	NM_001144986	C13orf38	13	34963856	36350737	1	13q13.3	1386882	12	Amplification	2.74928
13	35773775	35842318	NM_001142294	SPG20	13	34963856	36350737	1	13q13.3	1386882	12	Amplification	2.74928
13	35773775	35818935	NM_001142295	SPG20	13	34963856	36350737	1	13q13.3	1386882	12	Amplification	2.74928
13	35773775	35818647	NM_001142296	SPG20	13	34963856	36350737	1	13q13.3	1386882	12	Amplification	2.74928
13	35773775	35818647	NM_015087	SPG20	13	34963856	36350737	1	13q13.3	1386882	12	Amplification	2.74928
13	35903967	35915020	NM_001111046	CCNA1	13	34963856	36350737	1	13q13.3	1386882	12	Amplification	2.74928
13	35903967	35915020	NM_001111047	CCNA1	13	34963856	36350737	1	13q13.3	1386882	12	Amplification	2.74928
13	35904409	35915020	NM_001111045	CCNA1	13	34963856	36350737	1	13q13.3	1386882	12	Amplification	2.74928
13	35904409	35915020	NM_003914	CCNA1	13	34963856	36350737	1	13q13.3	1386882	12	Amplification	2.74928
13	36146049	36169976	NM_203451	C13orf36	13	34963856	36350737	1	13q13.3	1386882	12	Amplification	2.74928
13	36291339	36301741	NM_000538	RFXAP	13	34963856	36350737	1	13q13.3	1386882	12	Amplification	2.74928
13	36316968	36392410	NM_001127217	SMAD9	13	34963856	36350737	0.447623	13q13.3	1386882	12	Amplification	2.74928
13	36316968	36392410	NM_005905	SMAD9	13	34963856	36350737	0.447623	13q13.3	1386882	12	Amplification	2.74928
13	38510455	38522247	NM_001012754	NHLRC3	13	38511512	39122922	0.910371	13q13.3	611411	12	Amplification	2.74928
13	38510455	38522247	NM_001017370	NHLRC3	13	38511512	39122922	0.910371	13q13.3	611411	12	Amplification	2.74928
13	38815029	39075357	NM_005780	LHFP	13	38511512	39122922	1	13q13.3	611411	12	Amplification	2.74928
13	39666646	39692640	NR_033877	FLJ42392	13	39549339	40357561	1	13q14.11	808223	12	Amplification	2.75799
13	39819271	39953144	NR_024506	LOC646982	13	39549339	40357561	1	13q14.11	808223	12	Amplification	2.75799
13	39819271	39953144	NR_024507	LOC646982	13	39549339	40357561	1	13q14.11	808223	12	Amplification	2.75799
13	39923071	39953144	NR_024505	LOC646982	13	39549339	40357561	1	13q14.11	808223	12	Amplification	2.75799
13	40027801	40138735	NM_002015	FOXO1	13	39549339	40357561	1	13q14.11	808223	12	Amplification	2.75799
13	40199964	40200012	NR_031723	MIR320D1	13	39549339	40357561	1	13q14.11	808223	12	Amplification	2.75799
13	40201432	40243348	NM_005830	MRPS31	13	39549339	40357561	1	13q14.11	808223	12	Amplification	2.75799
13	40261547	40284597	NM_014252	SLC25A15	13	39549339	40357561	1	13q14.11	808223	12	Amplification	2.75799
13	40269127	40393887	NR_003365	SUGT1P3	13	39549339	40357561	0.708835	13q14.11	808223	12	Amplification	2.75799
13	40282902	40282998	NR_030352	MIR621	13	39549339	40357561	1	13q14.11	808223	12	Amplification	2.75799
13	41038961	41433222	NM_015058	KIAA0564	13	41040049	41837558	0.99724	13q14.11	797510	12	Amplification	2.74238
13	41191473	41433222	NM_001009814	KIAA0564	13	41040049	41837558	1	13q14.11	797510	12	Amplification	2.74238
13	41520889	41701889	NM_152910	DGKH	13	41040049	41837558	1	13q14.11	797510	12	Amplification	2.74238
13	41520889	41701889	NM_178009	DGKH	13	41040049	41837558	1	13q14.11	797510	12	Amplification	2.74238
13	41744289	41795403	NM_016248	AKAP11	13	41040049	41837558	1	13q14.11	797510	12	Amplification	2.74238
13	42253686	42263686	NM_182508	C13orf30	13	42135444	43575837	1	13q14.11	1440394	12	Amplification	2.76796
13	42360122	42464378	NM_001002264	EPSTI1	13	42135444	43575837	1	13q14.11	1440394	12	Amplification	2.76796
13	42360122	42464378	NM_033255	EPSTI1	13	42135444	43575837	1	13q14.11	1440394	12	Amplification	2.76796
13	42495362	42581307	NM_013238	DNAJC15	13	42135444	43575837	1	13q14.11	1440394	12	Amplification	2.76796
13	42685666	43259107	NM_017993	ENOX1	13	42135444	43575837	1	13q14.11	1440394	12	Amplification	2.76796
13	42685700	43101614	NM_001127615	ENOX1	13	42135444	43575837	1	13q14.11	1440394	12	Amplification	2.76796
13	43308489	43351827	NM_144974	CCDC122	13	42135444	43575837	1	13q14.11	1440394	12	Amplification	2.76796
13	43351420	43366069	NM_001128303	C13orf31	13	42135444	43575837	1	13q14.11	1440394	12	Amplification	2.76796
13	43351969	43366069	NM_153218	C13orf31	13	42135444	43575837	1	13q14.11	1440394	12	Amplification	2.76796
13	43494471	43502600	NR_026955	NCRNA00284	13	42135444	43575837	1	13q14.11	1440394	12	Amplification	2.76796
13	65774967	66702470	NM_020403	PCDH9	13	64592641	67738400	1	13q21.32 - 13q21.33	3145760	12	Amplification	2.95209
13	65774967	66702470	NM_203487	PCDH9	13	64592641	67738400	1	13q21.32 - 13q21.33	3145760	12	Amplification	2.95209
13	75021928	75078070	NM_006002	UCHL3	13	75073176	75338317	0.0871881	13q22.2	265142	12	Amplification	2.79609
13	75092571	75332008	NM_005358	LMO7	13	75073176	75338317	1	13q22.2	265142	12	Amplification	2.79609
13	75232798	75332008	NM_015842	LMO7	13	75073176	75338317	1	13q22.2	265142	12	Amplification	2.79609
13	76352305	76358542	NM_138444	KCTD12	13	76113076	76472449	1	13q22.3	359374	12	Amplification	2.85163
13	76400586	76401226	NR_026983	BTF3P11	13	76113076	76472449	1	13q22.3	359374	12	Amplification	2.85163
13	76464060	76474654	NM_006493	CLN5	13	76113076	76472449	0.791883	13q22.3	359374	12	Amplification	2.85163
13	79808113	79813088	NM_005842	SPRY2	13	79259039	80337935	1	13q31.1	1078897	12	Amplification	2.8694
13	83349344	83354530	NM_052910	SLITRK1	13	82366173	87407344	1	13q31.1 - 13q31.2	5041172	12	Amplification	3.00567
13	83421117	83836271	NR_031642	MIR548F1	13	82366173	87407344	1	13q31.1 - 13q31.2	5041172	12	Amplification	3.00567
13	85264923	85271485	NM_032229	SLITRK6	13	82366173	87407344	1	13q31.1 - 13q31.2	5041172	12	Amplification	3.00567
13	86894243	87121220	NR_033829	LOC642345	13	82366173	87407344	1	13q31.1 - 13q31.2	5041172	12	Amplification	3.00567
13	87122871	87129872	NM_015567	SLITRK5	13	82366173	87407344	1	13q31.1 - 13q31.2	5041172	12	Amplification	3.00567
13	92677079	93858275	NM_005708	GPC6	13	93041183	93160318	0.10086	13q31.3	119136	12	Amplification	2.91979
9	19497450	19778592	NM_001193288	SLC24A2	9	19510423	20329432	0.953856	9p22.1 - 9p21.3	819010	12	Amplification	2.74564
9	19497450	19778592	NM_020344	SLC24A2	9	19510423	20329432	0.953856	9p22.1 - 9p21.3	819010	12	Amplification	2.74564
9	20334968	20612515	NM_004529	MLLT3	9	20329432	21174897	1	9p21.3	845466	12	Amplification	2.81011
9	20648309	20985955	NM_017794	KIAA1797	9	20329432	21174897	1	9p21.3	845466	12	Amplification	2.81011
9	20706104	20706188	NR_030166	MIR491	9	20329432	21174897	1	9p21.3	845466	12	Amplification	2.81011
9	20996365	21021636	NM_001010915	PTPLAD2	9	20329432	21174897	1	9p21.3	845466	12	Amplification	2.81011
9	21067104	21067944	NM_002176	IFNB1	9	20329432	21174897	1	9p21.3	845466	12	Amplification	2.81011
9	21130631	21132145	NM_002177	IFNW1	9	20329432	21174897	1	9p21.3	845466	12	Amplification	2.81011
9	21155636	21156660	NM_002175	IFNA21	9	20329432	21174897	1	9p21.3	845466	12	Amplification	2.81011
8	97726675	98224899	NM_016134	PGCP	8	97772447	98500878	0.90813	8q22.1	728432	12	Amplification	2.9665
8	98354890	98359353	NM_033512	TSPYL5	8	97772447	98500878	1	8q22.1	728432	12	Amplification	2.9665
8	104582152	105335833	NM_001100117	RIMS2	8	104750494	105356119	0.776641	8q22.3	605626	12	Amplification	3.29864
8	104900592	105335833	NM_014677	RIMS2	8	104750494	105356119	1	8q22.3	605626	12	Amplification	3.29864
8	105421230	105438093	NM_030788	TM7SF4	8	105383447	105743075	1	8q22.3	359629	12	Amplification	2.90666
8	105460828	105548454	NM_001385	DPYS	8	105383447	105743075	1	8q22.3	359629	12	Amplification	2.90666
8	105570636	105670429	NM_001135703	LRP12	8	105383447	105743075	1	8q22.3	359629	12	Amplification	2.90666
8	105570636	105670429	NM_013437	LRP12	8	105383447	105743075	1	8q22.3	359629	12	Amplification	2.90666
8	110655581	110773197	NM_001099743	SYBU	8	110742347	111034130	0.262301	8q23.2	291784	12	Amplification	3.21151
8	110655581	110773197	NM_001099744	SYBU	8	110742347	111034130	0.262301	8q23.2	291784	12	Amplification	3.21151
8	110655581	110762411	NM_001099745	SYBU	8	110742347	111034130	0.18782	8q23.2	291784	12	Amplification	3.21151
8	110655581	110762411	NM_001099746	SYBU	8	110742347	111034130	0.18782	8q23.2	291784	12	Amplification	3.21151
8	113304333	114518419	NM_052900	CSMD3	8	112723045	114825393	1	8q23.3	2102349	12	Amplification	3.19726
8	113304333	114518419	NM_198123	CSMD3	8	112723045	114825393	1	8q23.3	2102349	12	Amplification	3.19726
8	113304333	114458559	NM_198124	CSMD3	8	112723045	114825393	1	8q23.3	2102349	12	Amplification	3.19726
8	113724898	113724989	NR_031745	MIR2053	8	112723045	114825393	1	8q23.3	2102349	12	Amplification	3.19726
8	116489900	116750403	NM_014112	TRPS1	8	116256437	116716481	0.869783	8q23.3	460045	12	Amplification	3.17195
8	117726236	117837244	NM_003756	EIF3H	8	117567553	118937393	1	8q23.3 - 8q24.11	1369841	12	Amplification	3.00775
8	117847923	117856103	NM_032334	UTP23	8	117567553	118937393	1	8q23.3 - 8q24.11	1369841	12	Amplification	3.00775
8	117927354	117956287	NM_006265	RAD21	8	117567553	118937393	1	8q23.3 - 8q24.11	1369841	12	Amplification	3.00775
8	117955844	117958289	NR_033886	NCRNA00255	8	117567553	118937393	1	8q23.3 - 8q24.11	1369841	12	Amplification	3.00775
8	117956148	117956221	NR_037404	MIR3610	8	117567553	118937393	1	8q23.3 - 8q24.11	1369841	12	Amplification	3.00775
8	118019645	118025421	NM_001025357	C8orf85	8	117567553	118937393	1	8q23.3 - 8q24.11	1369841	12	Amplification	3.00775
8	118031693	118258135	NM_001172811	SLC30A8	8	117567553	118937393	1	8q23.3 - 8q24.11	1369841	12	Amplification	3.00775
8	118032371	118258135	NM_001172813	SLC30A8	8	117567553	118937393	1	8q23.3 - 8q24.11	1369841	12	Amplification	3.00775
8	118032371	118258135	NM_001172815	SLC30A8	8	117567553	118937393	1	8q23.3 - 8q24.11	1369841	12	Amplification	3.00775
8	118216518	118258135	NM_001172814	SLC30A8	8	117567553	118937393	1	8q23.3 - 8q24.11	1369841	12	Amplification	3.00775
8	118216518	118258135	NM_173851	SLC30A8	8	117567553	118937393	1	8q23.3 - 8q24.11	1369841	12	Amplification	3.00775
8	118602146	118621683	NM_080651	MED30	8	117567553	118937393	1	8q23.3 - 8q24.11	1369841	12	Amplification	3.00775
8	118880783	119193240	NM_000127	EXT1	8	117567553	118937393	0.18118	8q23.3 - 8q24.11	1369841	12	Amplification	3.00775
8	118880783	119193240	NM_000127	EXT1	8	118937393	119040148	0.328863	8q24.11	102756	12	Amplification	2.94092
8	120148605	120188384	NM_006438	COLEC10	8	120185886	121661206	0.0628205	8q24.12	1475321	12	Amplification	3.10309
8	120289791	120327096	NM_052886	MAL2	8	120185886	121661206	1	8q24.12	1475321	12	Amplification	3.10309
8	120497733	120505860	NM_002514	NOV	8	120185886	121661206	1	8q24.12	1475321	12	Amplification	3.10309
8	120638500	120720288	NM_001040092	ENPP2	8	120185886	121661206	1	8q24.12	1475321	12	Amplification	3.10309
8	120638500	120720288	NM_006209	ENPP2	8	120185886	121661206	1	8q24.12	1475321	12	Amplification	3.10309
8	120638501	120720288	NM_001130863	ENPP2	8	120185886	121661206	1	8q24.12	1475321	12	Amplification	3.10309
8	120812195	120914256	NM_003184	TAF2	8	120185886	121661206	1	8q24.12	1475321	12	Amplification	3.10309
8	120915362	120937352	NM_024094	DSCC1	8	120185886	121661206	1	8q24.12	1475321	12	Amplification	3.10309
8	120955081	121132339	NM_022783	DEPTOR	8	120185886	121661206	1	8q24.12	1475321	12	Amplification	3.10309
8	121206533	121453455	NM_021110	COL14A1	8	120185886	121661206	1	8q24.12	1475321	12	Amplification	3.10309
8	121477264	121526829	NM_014078	MRPL13	8	120185886	121661206	1	8q24.12	1475321	12	Amplification	3.10309
8	121526847	121605057	NM_022045	MTBP	8	120185886	121661206	1	8q24.12	1475321	12	Amplification	3.10309
8	121617166	121893491	NM_021021	SNTB1	8	120185886	121661206	0.159381	8q24.12	1475321	12	Amplification	3.10309
8	121617166	121893491	NM_021021	SNTB1	8	121661206	123687429	0.840623	8q24.12 - 8q24.13	2026224	12	Amplification	3.05992
8	122694452	122722812	NM_005328	HAS2	8	121661206	123687429	1	8q24.12 - 8q24.13	2026224	12	Amplification	3.05992
8	122720767	122726746	NR_002835	HAS2-AS1	8	121661206	123687429	1	8q24.12 - 8q24.13	2026224	12	Amplification	3.05992
8	124850063	124896872	NM_144963	FAM91A1	8	124828875	124907902	1	8q24.13	79028	12	Amplification	2.84734
8	128497039	128498624	NM_001159542	POU5F1B	8	128480511	128635937	1	8q24.21	155427	12	Amplification	2.86003
8	128524777	128563567	NR_024393	LOC727677	8	128480511	128635937	1	8q24.21	155427	12	Amplification	2.86003
8	130297895	130322669	NR_033916	LOC728724	8	129378764	130610512	1	8q24.21	1231749	12	Amplification	2.97328
8	131861729	132122018	NM_001115	ADCY8	8	131931112	133087232	0.73344	8q24.22	1156121	12	Amplification	3.02422
8	132985541	133094954	NM_015137	EFR3A	8	131931112	133087232	0.929424	8q24.22	1156121	12	Amplification	3.02422
8	132985541	133094954	NM_015137	EFR3A	8	133087232	133938572	0.0705851	8q24.22	851341	12	Amplification	2.93142
8	133105649	133140810	NM_001080399	OC90	8	133087232	133938572	1	8q24.22	851341	12	Amplification	2.93142
8	133142915	133186695	NM_001145095	HHLA1	8	133087232	133938572	1	8q24.22	851341	12	Amplification	2.93142
8	133210438	133562187	NM_004519	KCNQ3	8	133087232	133938572	1	8q24.22	851341	12	Amplification	2.93142
8	133641927	133642909	NR_026684	HPYR1	8	133087232	133938572	1	8q24.22	851341	12	Amplification	2.93142
8	133653629	133756996	NM_012472	LRRC6	8	133087232	133938572	1	8q24.22	851341	12	Amplification	2.93142
8	133791374	133842097	NM_001145153	TMEM71	8	133087232	133938572	1	8q24.22	851341	12	Amplification	2.93142
8	133791374	133842097	NM_144649	TMEM71	8	133087232	133938572	1	8q24.22	851341	12	Amplification	2.93142
8	133856786	133930235	NM_016018	PHF20L1	8	133087232	133938572	1	8q24.22	851341	12	Amplification	2.93142
8	133856786	133906770	NM_032205	PHF20L1	8	133087232	133938572	1	8q24.22	851341	12	Amplification	2.93142
8	133856786	133894622	NM_198513	PHF20L1	8	133087232	133938572	1	8q24.22	851341	12	Amplification	2.93142
8	135559213	135777984	NM_001029939	ZFAT	8	134658750	137031095	1	8q24.22 - 8q24.23	2372346	12	Amplification	2.84656
8	135559213	135777984	NM_001167583	ZFAT	8	134658750	137031095	1	8q24.22 - 8q24.23	2372346	12	Amplification	2.84656
8	135559213	135794475	NM_001174157	ZFAT	8	134658750	137031095	1	8q24.22 - 8q24.23	2372346	12	Amplification	2.84656
8	135559213	135777984	NM_001174158	ZFAT	8	134658750	137031095	1	8q24.22 - 8q24.23	2372346	12	Amplification	2.84656
8	135559213	135794475	NM_020863	ZFAT	8	134658750	137031095	1	8q24.22 - 8q24.23	2372346	12	Amplification	2.84656
8	135679496	135682115	NR_002438	ZFAT-AS1	8	134658750	137031095	1	8q24.22 - 8q24.23	2372346	12	Amplification	2.84656
8	135881945	135882033	NR_029666	MIR30B	8	134658750	137031095	1	8q24.22 - 8q24.23	2372346	12	Amplification	2.84656
8	135886301	135886371	NR_029599	MIR30D	8	134658750	137031095	1	8q24.22 - 8q24.23	2372346	12	Amplification	2.84656
8	136315556	136381145	NR_026706	LOC286094	8	134658750	137031095	1	8q24.22 - 8q24.23	2372346	12	Amplification	2.84656
8	136538898	136729031	NM_006558	KHDRBS3	8	134658750	137031095	1	8q24.22 - 8q24.23	2372346	12	Amplification	2.84656
8	139211448	139578248	NM_015912	FAM135B	8	139103048	140137481	1	8q24.23 - 8q24.3	1034434	12	Amplification	2.81645
8	139669660	139995419	NM_152888	COL22A1	8	139103048	140137481	1	8q24.23 - 8q24.3	1034434	12	Amplification	2.81645
5	42792677	42838297	NM_001134848	CCDC152	5	42565985	42837911	0.991539	5p12	271927	9	Amplification	2.8233
5	42835739	42847782	NM_001085486	SEPP1	5	42565985	42837911	0.180422	5p12	271927	9	Amplification	2.8233
5	42835739	42847782	NM_001093726	SEPP1	5	42565985	42837911	0.180422	5p12	271927	9	Amplification	2.8233
13	22369169	22370321	NR_033774	BASP1P1	13	22085449	22501544	1	13q12.11 - 13q12.12	416096	11	Amplification	2.82048
13	22653060	22797305	NM_000231	SGCG	13	22501544	22798139	1	13q12.12	296596	11	Amplification	2.87992
13	23632861	23779213	NM_001166271	SPATA13	13	23665060	24125968	0.779991	13q12.12	460909	11	Amplification	2.87382
13	23632861	23779213	NM_153023	SPATA13	13	23665060	24125968	0.779991	13q12.12	460909	11	Amplification	2.87382
13	23781716	23794670	NM_178540	C1QTNF9	13	23665060	24125968	1	13q12.12	460909	11	Amplification	2.87382
13	23893069	23984949	NM_006437	PARP4	13	23665060	24125968	1	13q12.12	460909	11	Amplification	2.87382
13	24052346	24069813	NR_002815	LOC374491	13	23665060	24125968	1	13q12.12	460909	11	Amplification	2.87382
13	27610643	27767476	NM_175854	PAN3	13	27662425	27813946	0.669829	13q12.2 - 13q12.3	151522	11	Amplification	2.81138
13	27772483	27967266	NM_002019	FLT1	13	27662425	27813946	0.212872	13q12.2 - 13q12.3	151522	11	Amplification	2.81138
13	30672112	30804412	NM_194318	B3GALTL	13	30764998	34299583	0.297919	13q12.3 - 13q13.2	3534586	11	Amplification	2.77036
13	31211679	31275010	NM_001166058	RXFP2	13	30764998	34299583	1	13q12.3 - 13q13.2	3534586	11	Amplification	2.77036
13	31211679	31275010	NM_130806	RXFP2	13	30764998	34299583	1	13q12.3 - 13q13.2	3534586	11	Amplification	2.77036
13	31318920	31431722	NR_027062	EEF1DP3	13	30764998	34299583	1	13q12.3 - 13q13.2	3534586	11	Amplification	2.77036
13	31503437	31768777	NM_023037	FRY	13	30764998	34299583	1	13q12.3 - 13q13.2	3534586	11	Amplification	2.77036
13	31775908	31784092	NM_001136571	ZAR1L	13	30764998	34299583	1	13q12.3 - 13q13.2	3534586	11	Amplification	2.77036
13	31787617	31871810	NM_000059	BRCA2	13	30764998	34299583	1	13q12.3 - 13q13.2	3534586	11	Amplification	2.77036
13	31872860	31900316	NM_001079691	N4BP2L1	13	30764998	34299583	1	13q12.3 - 13q13.2	3534586	11	Amplification	2.77036
13	31872860	31900316	NM_052818	N4BP2L1	13	30764998	34299583	1	13q12.3 - 13q13.2	3534586	11	Amplification	2.77036
13	31904930	32010937	NM_033111	N4BP2L2	13	30764998	34299583	1	13q12.3 - 13q13.2	3534586	11	Amplification	2.77036
13	31976643	31981533	NR_026928	CG030	13	30764998	34299583	1	13q12.3 - 13q13.2	3534586	11	Amplification	2.77036
13	31989030	32010933	NM_014887	N4BP2L2	13	30764998	34299583	1	13q12.3 - 13q13.2	3534586	11	Amplification	2.77036
13	32058564	32250159	NM_015032	PDS5B	13	30764998	34299583	1	13q12.3 - 13q13.2	3534586	11	Amplification	2.77036
13	32488571	32538283	NM_004795	KL	13	30764998	34299583	1	13q12.3 - 13q13.2	3534586	11	Amplification	2.77036
13	32575272	32678188	NM_052851	STARD13	13	30764998	34299583	1	13q12.3 - 13q13.2	3534586	11	Amplification	2.77036
13	32575272	32757902	NM_178006	STARD13	13	30764998	34299583	1	13q12.3 - 13q13.2	3534586	11	Amplification	2.77036
13	32575272	32658217	NM_178007	STARD13	13	30764998	34299583	1	13q12.3 - 13q13.2	3534586	11	Amplification	2.77036
13	33290206	33309645	NM_002915	RFC3	13	30764998	34299583	1	13q12.3 - 13q13.2	3534586	11	Amplification	2.77036
13	33290206	33438696	NM_181558	RFC3	13	30764998	34299583	1	13q12.3 - 13q13.2	3534586	11	Amplification	2.77036
13	40269127	40393887	NR_003365	SUGT1P3	13	40357561	41040049	0.291173	13q14.11	682489	11	Amplification	2.76301
13	40404055	40454419	NM_001145353	ELF1	13	40357561	41040049	1	13q14.11	682489	11	Amplification	2.76301
13	40404055	40491509	NM_172373	ELF1	13	40357561	41040049	1	13q14.11	682489	11	Amplification	2.76301
13	40533697	40556140	NM_007187	WBP4	13	40357561	41040049	1	13q14.11	682489	11	Amplification	2.76301
13	40599709	40604937	NM_152903	KBTBD6	13	40357561	41040049	1	13q14.11	682489	11	Amplification	2.76301
13	40663711	40666703	NM_032138	KBTBD7	13	40357561	41040049	1	13q14.11	682489	11	Amplification	2.76301
13	40688516	40735714	NM_004294	MTRF1	13	40357561	41040049	1	13q14.11	682489	11	Amplification	2.76301
13	40783341	40830855	NM_001110798	NAA16	13	40357561	41040049	1	13q14.11	682489	11	Amplification	2.76301
13	40783341	40849167	NM_024561	NAA16	13	40357561	41040049	1	13q14.11	682489	11	Amplification	2.76301
13	40783418	40830855	NM_018527	NAA16	13	40357561	41040049	1	13q14.11	682489	11	Amplification	2.76301
13	40903476	40904141	NR_002163	OR7E37P	13	40357561	41040049	1	13q14.11	682489	11	Amplification	2.76301
13	40915060	40915724	NR_002163.1	OR7E37P	13	40357561	41040049	1	13q14.11	682489	11	Amplification	2.76301
13	40929542	40943014	NM_014059	C13orf15	13	40357561	41040049	1	13q14.11	682489	11	Amplification	2.76301
13	41038961	41433222	NM_015058	KIAA0564	13	40357561	41040049	0.00276212	13q14.11	682489	11	Amplification	2.76301
13	42034872	42080150	NM_033012	TNFSF11	13	41837558	42135444	1	13q14.11	297887	11	Amplification	2.76301
13	42046291	42080150	NM_003701	TNFSF11	13	41837558	42135444	1	13q14.11	297887	11	Amplification	2.76301
13	43845978	43869851	NM_001010897	SERP2	13	43575837	44302984	1	13q14.11 - 13q14.12	727148	11	Amplification	2.78379
13	43905655	44048702	NM_183422	TSC22D1	13	43575837	44302984	1	13q14.11 - 13q14.12	727148	11	Amplification	2.78379
13	43905659	43908980	NM_006022	TSC22D1	13	43575837	44302984	1	13q14.11 - 13q14.12	727148	11	Amplification	2.78379
13	44411384	44461614	NM_012345	NUFIP1	13	44457296	45003744	0.0859828	13q14.12	546449	11	Amplification	2.84595
13	44461687	44500405	NM_018559	KIAA1704	13	44457296	45003744	1	13q14.12	546449	11	Amplification	2.84595
13	44592631	44756240	NM_004128	GTF2F2	13	44457296	45003744	1	13q14.12	546449	11	Amplification	2.84595
13	44664988	44673176	NM_198404	KCTD4	13	44457296	45003744	1	13q14.12	546449	11	Amplification	2.84595
13	44809304	44813298	NM_003295	TPT1	13	44457296	45003744	1	13q14.12	546449	11	Amplification	2.84595
13	44809615	44809745	NR_002967	SNORA31	13	44457296	45003744	1	13q14.12	546449	11	Amplification	2.84595
13	44813480	44863619	NR_024458	LOC100190939	13	44457296	45003744	1	13q14.12	546449	11	Amplification	2.84595
13	44865454	44890517	NM_001010875	SLC25A30	13	44457296	45003744	1	13q14.12	546449	11	Amplification	2.84595
13	44937072	45008762	NM_031431	COG3	13	44457296	45003744	0.930005	13q14.12	546449	11	Amplification	2.84595
13	52500973	52524190	NM_006418	OLFM4	13	52442583	52792108	1	13q21.1	349526	11	Amplification	2.79168
13	92677079	93858275	NM_005708	GPC6	13	93160318	93720699	0.474419	13q31.3	560382	11	Amplification	2.94527
13	100504131	100866815	NM_052867	NALCN	13	100177845	104953041	1	13q32.3 - 13q33.2	4775197	11	Amplification	2.86536
13	100902967	101166796	NM_004791	ITGBL1	13	100177845	104953041	1	13q32.3 - 13q33.2	4775197	11	Amplification	2.86536
13	101171206	101366997	NM_004115	FGF14	13	100177845	104953041	1	13q32.3 - 13q33.2	4775197	11	Amplification	2.86536
13	101171206	101852126	NM_175929	FGF14	13	100177845	104953041	1	13q32.3 - 13q33.2	4775197	11	Amplification	2.86536
13	101742671	101844871	NR_036486	LOC283480	13	100177845	104953041	1	13q32.3 - 13q33.2	4775197	11	Amplification	2.86536
13	101844929	101846057	NR_036487	LOC283481	13	100177845	104953041	1	13q32.3 - 13q33.2	4775197	11	Amplification	2.86536
13	102047287	102129525	NM_003291	TPP2	13	100177845	104953041	1	13q32.3 - 13q33.2	4775197	11	Amplification	2.86536
13	102136098	102144856	NM_001010977	C13orf39	13	100177845	104953041	1	13q32.3 - 13q33.2	4775197	11	Amplification	2.86536
13	102179718	102209424	NM_001146197	C13orf40	13	100177845	104953041	1	13q32.3 - 13q33.2	4775197	11	Amplification	2.86536
13	102216464	102224151	NM_138779	C13orf27	13	100177845	104953041	1	13q32.3 - 13q33.2	4775197	11	Amplification	2.86536
13	102234632	102249406	NM_024089	KDELC1	13	100177845	104953041	1	13q32.3 - 13q33.2	4775197	11	Amplification	2.86536
13	102249400	102291890	NM_001159596	BIVM	13	100177845	104953041	1	13q32.3 - 13q33.2	4775197	11	Amplification	2.86536
13	102249400	102291890	NM_017693	BIVM	13	100177845	104953041	1	13q32.3 - 13q33.2	4775197	11	Amplification	2.86536
13	102296175	102326347	NM_000123	ERCC5	13	100177845	104953041	1	13q32.3 - 13q33.2	4775197	11	Amplification	2.86536
13	102330450	102346385	NR_026965	LOC121952	13	100177845	104953041	1	13q32.3 - 13q33.2	4775197	11	Amplification	2.86536
13	102494349	102517198	NM_000452	SLC10A2	13	100177845	104953041	1	13q32.3 - 13q33.2	4775197	11	Amplification	2.86536
13	104916217	104941385	NM_001161814	DAOA	13	100177845	104953041	1	13q32.3 - 13q33.2	4775197	11	Amplification	2.86536
13	104916365	104941385	NM_172370	DAOA	13	100177845	104953041	1	13q32.3 - 13q33.2	4775197	11	Amplification	2.86536
13	104916566	104941385	NM_001161812	DAOA	13	100177845	104953041	1	13q32.3 - 13q33.2	4775197	11	Amplification	2.86536
13	106618880	107317462	NM_001080396	FAM155A	13	106356577	106696855	0.11162	13q33.3	340279	11	Amplification	2.84369
13	106618880	107317462	NM_001080396	FAM155A	13	106696855	108649581	0.888381	13q33.3	1952727	11	Amplification	2.8787
13	107657793	107668718	NM_001098268	LIG4	13	106696855	108649581	1	13q33.3	1952727	11	Amplification	2.8787
13	107657793	107665132	NM_002312	LIG4	13	106696855	108649581	1	13q33.3	1952727	11	Amplification	2.8787
13	107657793	107665884	NM_206937	LIG4	13	106696855	108649581	1	13q33.3	1952727	11	Amplification	2.8787
13	107668764	107684605	NM_032859	ABHD13	13	106696855	108649581	1	13q33.3	1952727	11	Amplification	2.8787
13	107719978	107757367	NM_001145645	TNFSF13B	13	106696855	108649581	1	13q33.3	1952727	11	Amplification	2.8787
13	107719978	107757367	NM_006573	TNFSF13B	13	106696855	108649581	1	13q33.3	1952727	11	Amplification	2.8787
13	108046501	108658357	NM_015011	MYO16	13	106696855	108649581	0.985657	13q33.3	1952727	11	Amplification	2.8787
13	108079572	108658357	NM_001198950	MYO16	13	106696855	108649581	0.984837	13q33.3	1952727	11	Amplification	2.8787
9	8304246	10602724	NM_002839	PTPRD	9	8876343	8903511	0.0118204	9p24.1	27169	11	Amplification	2.85131
9	8304246	10602724	NM_002839	PTPRD	9	8903511	12378737	0.739278	9p24.1 - 9p23	3475227	11	Amplification	2.89365
9	19497450	19778592	NM_001193288	SLC24A2	9	19491439	19510423	0.0461473	9p22.1	18985	11	Amplification	2.72373
9	19497450	19778592	NM_020344	SLC24A2	9	19491439	19510423	0.0461473	9p22.1	18985	11	Amplification	2.72373
9	21176618	21177599	NM_021068	IFNA4	9	21174897	21938727	1	9p21.3	763831	11	Amplification	2.72373
9	21191468	21192205	NM_021057	IFNA7	9	21174897	21938727	1	9p21.3	763831	11	Amplification	2.72373
9	21196180	21197143	NM_002171	IFNA10	9	21174897	21938727	1	9p21.3	763831	11	Amplification	2.72373
9	21206372	21207311	NM_002173	IFNA16	9	21174897	21938727	1	9p21.3	763831	11	Amplification	2.72373
9	21217242	21218222	NM_021268	IFNA17	9	21174897	21938727	1	9p21.3	763831	11	Amplification	2.72373
9	21229201	21229979	NM_002172	IFNA14	9	21174897	21938727	1	9p21.3	763831	11	Amplification	2.72373
9	21267687	21268563	NR_036676	IFNA22P	9	21174897	21938727	1	9p21.3	763831	11	Amplification	2.72373
9	21294613	21295313	NM_002169	IFNA5	9	21174897	21938727	1	9p21.3	763831	11	Amplification	2.72373
9	21321018	21325430	NM_018847	KLHL9	9	21174897	21938727	1	9p21.3	763831	11	Amplification	2.72373
9	21340317	21340887	NM_021002	IFNA6	9	21174897	21938727	1	9p21.3	763831	11	Amplification	2.72373
9	21357371	21358076	NM_006900	IFNA13	9	21174897	21938727	1	9p21.3	763831	11	Amplification	2.72373
9	21374254	21375397	NM_000605	IFNA2	9	21174897	21938727	1	9p21.3	763831	11	Amplification	2.72373
9	21399146	21400185	NM_002170	IFNA8	9	21174897	21938727	1	9p21.3	763831	11	Amplification	2.72373
9	21430440	21431316	NM_024013	IFNA1	9	21174897	21938727	1	9p21.3	763831	11	Amplification	2.72373
9	21444267	21549698	NR_027054	LOC554202	9	21174897	21938727	1	9p21.3	763831	11	Amplification	2.72373
9	21470839	21472313	NM_176891	IFNE	9	21174897	21938727	1	9p21.3	763831	11	Amplification	2.72373
9	21502114	21502185	NR_029505	MIR31	9	21174897	21938727	1	9p21.3	763831	11	Amplification	2.72373
9	21792635	21855970	NM_002451	MTAP	9	21174897	21938727	1	9p21.3	763831	11	Amplification	2.72373
9	21957138	21957754	NR_024274	C9orf53	9	21938727	24129890	1	9p21.3	2191164	11	Amplification	2.78995
9	21957751	21965133	NM_000077	CDKN2A	9	21938727	24129890	1	9p21.3	2191164	11	Amplification	2.78995
9	21957751	21965133	NM_001195132	CDKN2A	9	21938727	24129890	1	9p21.3	2191164	11	Amplification	2.78995
9	21957751	21984491	NM_058195	CDKN2A	9	21938727	24129890	1	9p21.3	2191164	11	Amplification	2.78995
9	21957751	21964827	NM_058197	CDKN2A	9	21938727	24129890	1	9p21.3	2191164	11	Amplification	2.78995
9	21984790	22111094	NR_003529	CDKN2B-AS1	9	21938727	24129890	1	9p21.3	2191164	11	Amplification	2.78995
9	21992902	21999313	NM_004936	CDKN2B	9	21938727	24129890	1	9p21.3	2191164	11	Amplification	2.78995
9	21992902	21999313	NM_078487	CDKN2B	9	21938727	24129890	1	9p21.3	2191164	11	Amplification	2.78995
9	22436840	22442473	NM_022160	DMRTA1	9	21938727	24129890	1	9p21.3	2191164	11	Amplification	2.78995
9	23680103	23811844	NM_001171195	ELAVL2	9	21938727	24129890	1	9p21.3	2191164	11	Amplification	2.78995
9	23680103	23811479	NM_001171197	ELAVL2	9	21938727	24129890	1	9p21.3	2191164	11	Amplification	2.78995
9	23680103	23816064	NM_004432	ELAVL2	9	21938727	24129890	1	9p21.3	2191164	11	Amplification	2.78995
9	25666387	25668857	NM_001004125	TUSC1	9	25351137	27182215	1	9p21.3 - 9p21.2	1831079	11	Amplification	2.76134
9	26830683	26882827	NM_001167575	C9orf82	9	25351137	27182215	1	9p21.3 - 9p21.2	1831079	11	Amplification	2.76134
9	26830683	26882827	NM_024828	C9orf82	9	25351137	27182215	1	9p21.3 - 9p21.2	1831079	11	Amplification	2.76134
9	26893368	26937469	NM_001031689	PLAA	9	25351137	27182215	1	9p21.3 - 9p21.2	1831079	11	Amplification	2.76134
9	26937037	27052932	NM_001099223	IFT74	9	25351137	27182215	1	9p21.3 - 9p21.2	1831079	11	Amplification	2.76134
9	26937310	27052932	NM_001099222	IFT74	9	25351137	27182215	1	9p21.3 - 9p21.2	1831079	11	Amplification	2.76134
9	26946371	27026797	NM_001099224	IFT74	9	25351137	27182215	1	9p21.3 - 9p21.2	1831079	11	Amplification	2.76134
9	26946371	27052932	NM_025103	IFT74	9	25351137	27182215	1	9p21.3 - 9p21.2	1831079	11	Amplification	2.76134
9	26983135	26995692	NM_022901	LRRC19	9	25351137	27182215	1	9p21.3 - 9p21.2	1831079	11	Amplification	2.76134
9	27099147	27220173	NM_000459	TEK	9	25351137	27182215	0.686368	9p21.3 - 9p21.2	1831079	11	Amplification	2.76134
8	94427871	94781838	NR_033858	LOC642924	8	94200670	94906616	1	8q22.1	705947	11	Amplification	2.91801
8	94781949	94809848	NM_145269	FAM92A1	8	94200670	94906616	1	8q22.1	705947	11	Amplification	2.91801
8	94812904	94822401	NM_203390	RBM12B	8	94200670	94906616	1	8q22.1	705947	11	Amplification	2.91801
8	94821515	94822224	NR_027259	C8orf39	8	94200670	94906616	1	8q22.1	705947	11	Amplification	2.91801
8	94836248	94899524	NM_001142301	TMEM67	8	94200670	94906616	1	8q22.1	705947	11	Amplification	2.91801
8	94836248	94899524	NM_153704	TMEM67	8	94200670	94906616	1	8q22.1	705947	11	Amplification	2.91801
8	94836248	94900637	NR_024522	TMEM67	8	94200670	94906616	1	8q22.1	705947	11	Amplification	2.91801
8	96326317	96350639	NM_177965	C8orf37	8	96323151	97772447	1	8q22.1	1449297	11	Amplification	2.90991
8	97028391	97029753	NR_036611	LOC100500773	8	96323151	97772447	1	8q22.1	1449297	11	Amplification	2.90991
8	97223734	97242197	NM_001001557	GDF6	8	96323151	97772447	1	8q22.1	1449297	11	Amplification	2.90991
8	97308480	97316948	NM_001199975	UQCRB	8	96323151	97772447	1	8q22.1	1449297	11	Amplification	2.90991
8	97308480	97317039	NM_006294	UQCRB	8	96323151	97772447	1	8q22.1	1449297	11	Amplification	2.90991
8	97320821	97342973	NM_015942	MTERFD1	8	96323151	97772447	1	8q22.1	1449297	11	Amplification	2.90991
8	97343343	97415951	NM_014754	PTDSS1	8	96323151	97772447	1	8q22.1	1449297	11	Amplification	2.90991
8	97575058	97693214	NM_002998	SDC2	8	96323151	97772447	1	8q22.1	1449297	11	Amplification	2.90991
8	97726675	98224899	NM_016134	PGCP	8	96323151	97772447	0.0918721	8q22.1	1449297	11	Amplification	2.90991
8	98725583	98811665	NM_178812	MTDH	8	98500878	98809962	0.980217	8q22.1	309085	11	Amplification	2.90991
8	99198697	99241246	NM_001145860	POP1	8	99200673	100182645	0.953561	8q22.2	981973	11	Amplification	2.78539
8	99198697	99241246	NM_001145861	POP1	8	99200673	100182645	0.953561	8q22.2	981973	11	Amplification	2.78539
8	99199244	99241246	NM_015029	POP1	8	99200673	100182645	0.965979	8q22.2	981973	11	Amplification	2.78539
8	99273563	99375798	NM_024759	NIPAL2	8	99200673	100182645	1	8q22.2	981973	11	Amplification	2.78539
8	99508426	99512200	NM_020697	KCNS2	8	99200673	100182645	1	8q22.2	981973	11	Amplification	2.78539
8	99536037	99907086	NM_006281	STK3	8	99200673	100182645	1	8q22.2	981973	11	Amplification	2.78539
8	100025807	100033503	NM_001142462	OSR2	8	99200673	100182645	1	8q22.2	981973	11	Amplification	2.78539
8	100025807	100033503	NM_053001	OSR2	8	99200673	100182645	1	8q22.2	981973	11	Amplification	2.78539
8	100094670	100291192	NM_015243	VPS13B	8	99200673	100182645	0.447663	8q22.2	981973	11	Amplification	2.78539
8	100094670	100958985	NM_017890	VPS13B	8	99200673	100182645	0.101787	8q22.2	981973	11	Amplification	2.78539
8	100094670	100958985	NM_152564	VPS13B	8	99200673	100182645	0.101787	8q22.2	981973	11	Amplification	2.78539
8	100094670	100203164	NM_181661	VPS13B	8	99200673	100182645	0.810876	8q22.2	981973	11	Amplification	2.78539
8	101042452	101187521	NM_015668	RGS22	8	101159635	103640898	0.192231	8q22.2 - 8q22.3	2481264	11	Amplification	2.78697
8	101214764	101227276	NM_001029860	FBXO43	8	101159635	103640898	1	8q22.2 - 8q22.3	2481264	11	Amplification	2.78697
8	101214764	101227276	NR_036491	FBXO43	8	101159635	103640898	1	8q22.2 - 8q22.3	2481264	11	Amplification	2.78697
8	101232015	101235407	NM_005034	POLR2K	8	101159635	103640898	1	8q22.2 - 8q22.3	2481264	11	Amplification	2.78697
8	101239439	101323307	NM_172218	SPAG1	8	101159635	103640898	1	8q22.2 - 8q22.3	2481264	11	Amplification	2.78697
8	101239832	101323307	NM_003114	SPAG1	8	101159635	103640898	1	8q22.2 - 8q22.3	2481264	11	Amplification	2.78697
8	101338464	101384664	NM_015435	RNF19A	8	101159635	103640898	1	8q22.2 - 8q22.3	2481264	11	Amplification	2.78697
8	101338464	101391504	NM_183419	RNF19A	8	101159635	103640898	1	8q22.2 - 8q22.3	2481264	11	Amplification	2.78697
8	101602176	101641189	NM_198401	ANKRD46	8	101159635	103640898	1	8q22.2 - 8q22.3	2481264	11	Amplification	2.78697
8	101654288	101731070	NM_152628	SNX31	8	101159635	103640898	1	8q22.2 - 8q22.3	2481264	11	Amplification	2.78697
8	101784320	101803492	NM_002568	PABPC1	8	101159635	103640898	1	8q22.2 - 8q22.3	2481264	11	Amplification	2.78697
8	101999980	102034398	NM_001135699	YWHAZ	8	101159635	103640898	1	8q22.2 - 8q22.3	2481264	11	Amplification	2.78697
8	101999980	102032737	NM_001135700	YWHAZ	8	101159635	103640898	1	8q22.2 - 8q22.3	2481264	11	Amplification	2.78697
8	101999980	102032737	NM_001135701	YWHAZ	8	101159635	103640898	1	8q22.2 - 8q22.3	2481264	11	Amplification	2.78697
8	101999980	102031976	NM_001135702	YWHAZ	8	101159635	103640898	1	8q22.2 - 8q22.3	2481264	11	Amplification	2.78697
8	101999980	102034800	NM_003406	YWHAZ	8	101159635	103640898	1	8q22.2 - 8q22.3	2481264	11	Amplification	2.78697
8	101999980	102033534	NM_145690	YWHAZ	8	101159635	103640898	1	8q22.2 - 8q22.3	2481264	11	Amplification	2.78697
8	102133458	102157656	NR_033962	FLJ42969	8	101159635	103640898	1	8q22.2 - 8q22.3	2481264	11	Amplification	2.78697
8	102278442	102287137	NM_001042510	ZNF706	8	101159635	103640898	1	8q22.2 - 8q22.3	2481264	11	Amplification	2.78697
8	102278442	102287050	NM_001042511	ZNF706	8	101159635	103640898	1	8q22.2 - 8q22.3	2481264	11	Amplification	2.78697
8	102278442	102287137	NM_016096	ZNF706	8	101159635	103640898	1	8q22.2 - 8q22.3	2481264	11	Amplification	2.78697
8	102450297	102451000	NR_002182	NACAP1	8	101159635	103640898	1	8q22.2 - 8q22.3	2481264	11	Amplification	2.78697
8	102573844	102751129	NM_024915	GRHL2	8	101159635	103640898	1	8q22.2 - 8q22.3	2481264	11	Amplification	2.78697
8	102767946	103205739	NM_001040624	NCALD	8	101159635	103640898	1	8q22.2 - 8q22.3	2481264	11	Amplification	2.78697
8	102767946	103205739	NM_001040625	NCALD	8	101159635	103640898	1	8q22.2 - 8q22.3	2481264	11	Amplification	2.78697
8	102767946	103205739	NM_001040626	NCALD	8	101159635	103640898	1	8q22.2 - 8q22.3	2481264	11	Amplification	2.78697
8	102767946	103205739	NM_001040627	NCALD	8	101159635	103640898	1	8q22.2 - 8q22.3	2481264	11	Amplification	2.78697
8	102767946	103205739	NM_001040628	NCALD	8	101159635	103640898	1	8q22.2 - 8q22.3	2481264	11	Amplification	2.78697
8	102767946	103205739	NM_001040629	NCALD	8	101159635	103640898	1	8q22.2 - 8q22.3	2481264	11	Amplification	2.78697
8	102767946	103206312	NM_001040630	NCALD	8	101159635	103640898	1	8q22.2 - 8q22.3	2481264	11	Amplification	2.78697
8	102767946	102872616	NM_032041	NCALD	8	101159635	103640898	1	8q22.2 - 8q22.3	2481264	11	Amplification	2.78697
8	103285905	103320236	NM_001172477	RRM2B	8	101159635	103640898	1	8q22.2 - 8q22.3	2481264	11	Amplification	2.78697
8	103285905	103320523	NM_001172478	RRM2B	8	101159635	103640898	1	8q22.2 - 8q22.3	2481264	11	Amplification	2.78697
8	103285905	103320523	NM_015713	RRM2B	8	101159635	103640898	1	8q22.2 - 8q22.3	2481264	11	Amplification	2.78697
8	103334745	103493672	NM_015902	UBR5	8	101159635	103640898	1	8q22.2 - 8q22.3	2481264	11	Amplification	2.78697
8	103633024	103642422	NM_024410	ODF1	8	101159635	103640898	0.837855	8q22.2 - 8q22.3	2481264	11	Amplification	2.78697
8	104102424	104154462	NM_001695	ATP6V1C1	8	104079991	104531191	1	8q22.3	451201	11	Amplification	2.9074
8	104214367	104222747	NR_027071	C8orf56	8	104079991	104531191	1	8q22.3	451201	11	Amplification	2.9074
8	104222097	104311710	NM_001024372	BAALC	8	104079991	104531191	1	8q22.3	451201	11	Amplification	2.9074
8	104222097	104311710	NM_024812	BAALC	8	104079991	104531191	1	8q22.3	451201	11	Amplification	2.9074
8	104236018	104236094	NR_036106	MIR3151	8	104079991	104531191	1	8q22.3	451201	11	Amplification	2.9074
8	104246913	104253545	NR_034092	LOC100499183	8	104079991	104531191	1	8q22.3	451201	11	Amplification	2.9074
8	104379837	104414271	NM_001164615	FZD6	8	104079991	104531191	1	8q22.3	451201	11	Amplification	2.9074
8	104380235	104414271	NM_001164616	FZD6	8	104079991	104531191	1	8q22.3	451201	11	Amplification	2.9074
8	104380235	104414271	NM_003506	FZD6	8	104079991	104531191	1	8q22.3	451201	11	Amplification	2.9074
8	104452962	104464394	NM_138455	CTHRC1	8	104079991	104531191	1	8q22.3	451201	11	Amplification	2.9074
8	104480042	104496645	NM_030780	SLC25A32	8	104079991	104531191	1	8q22.3	451201	11	Amplification	2.9074
8	104496118	104524857	NM_015420	DCAF13	8	104079991	104531191	1	8q22.3	451201	11	Amplification	2.9074
8	104582152	105335833	NM_001100117	RIMS2	8	104531191	104750494	0.223361	8q22.3	219304	11	Amplification	3.08386
8	106400323	106885944	NM_012082	ZFPM2	8	106547534	107752526	0.696861	8q23.1	1204993	11	Amplification	3.19337
8	107351582	107834098	NM_001198533	OXR1	8	106547534	107752526	0.830945	8q23.1	1204993	11	Amplification	3.19337
8	107351582	107834098	NM_018002	OXR1	8	106547534	107752526	0.830945	8q23.1	1204993	11	Amplification	3.19337
8	107529328	107834098	NM_001198532	OXR1	8	106547534	107752526	0.73235	8q23.1	1204993	11	Amplification	3.19337
8	107739212	107834098	NM_181354	OXR1	8	106547534	107752526	0.140325	8q23.1	1204993	11	Amplification	3.19337
8	108330886	108579431	NM_001146	ANGPT1	8	108180566	108723963	1	8q23.1	543398	11	Amplification	3.07715
8	108330886	108579431	NM_001199859	ANGPT1	8	108180566	108723963	1	8q23.1	543398	11	Amplification	3.07715
8	110168852	110200989	NM_003301	TRHR	8	110158525	110742347	1	8q23.1 - 8q23.2	583823	11	Amplification	3.25785
8	110322324	110411339	NM_001128211	NUDCD1	8	110158525	110742347	1	8q23.1 - 8q23.2	583823	11	Amplification	3.25785
8	110322324	110415527	NM_032869	NUDCD1	8	110158525	110742347	1	8q23.1 - 8q23.2	583823	11	Amplification	3.25785
8	110415728	110427366	NM_001193557	ENY2	8	110158525	110742347	1	8q23.1 - 8q23.2	583823	11	Amplification	3.25785
8	110415728	110427366	NM_020189	ENY2	8	110158525	110742347	1	8q23.1 - 8q23.2	583823	11	Amplification	3.25785
8	110415728	110427366	NR_036471	ENY2	8	110158525	110742347	1	8q23.1 - 8q23.2	583823	11	Amplification	3.25785
8	110415728	110427366	NR_036472	ENY2	8	110158525	110742347	1	8q23.1 - 8q23.2	583823	11	Amplification	3.25785
8	110443882	110612677	NM_177531	PKHD1L1	8	110158525	110742347	1	8q23.1 - 8q23.2	583823	11	Amplification	3.25785
8	110621105	110646568	NM_198120	EBAG9	8	110158525	110742347	1	8q23.1 - 8q23.2	583823	11	Amplification	3.25785
8	110621486	110646568	NM_004215	EBAG9	8	110158525	110742347	1	8q23.1 - 8q23.2	583823	11	Amplification	3.25785
8	110655581	110773197	NM_001099743	SYBU	8	110158525	110742347	0.737708	8q23.1 - 8q23.2	583823	11	Amplification	3.25785
8	110655581	110773197	NM_001099744	SYBU	8	110158525	110742347	0.737708	8q23.1 - 8q23.2	583823	11	Amplification	3.25785
8	110655581	110762411	NM_001099745	SYBU	8	110158525	110742347	0.812189	8q23.1 - 8q23.2	583823	11	Amplification	3.25785
8	110655581	110762411	NM_001099746	SYBU	8	110158525	110742347	0.812189	8q23.1 - 8q23.2	583823	11	Amplification	3.25785
8	110655581	110730309	NM_001099747	SYBU	8	110158525	110742347	1	8q23.1 - 8q23.2	583823	11	Amplification	3.25785
8	110655581	110730309	NM_001099748	SYBU	8	110158525	110742347	1	8q23.1 - 8q23.2	583823	11	Amplification	3.25785
8	110655581	110730309	NM_001099749	SYBU	8	110158525	110742347	1	8q23.1 - 8q23.2	583823	11	Amplification	3.25785
8	110655581	110730309	NM_001099750	SYBU	8	110158525	110742347	1	8q23.1 - 8q23.2	583823	11	Amplification	3.25785
8	110655581	110726999	NM_001099751	SYBU	8	110158525	110742347	1	8q23.1 - 8q23.2	583823	11	Amplification	3.25785
8	110655581	110726999	NM_001099752	SYBU	8	110158525	110742347	1	8q23.1 - 8q23.2	583823	11	Amplification	3.25785
8	110655581	110726228	NM_001099753	SYBU	8	110158525	110742347	1	8q23.1 - 8q23.2	583823	11	Amplification	3.25785
8	110655581	110726228	NM_001099754	SYBU	8	110158525	110742347	1	8q23.1 - 8q23.2	583823	11	Amplification	3.25785
8	110655581	110726228	NM_001099755	SYBU	8	110158525	110742347	1	8q23.1 - 8q23.2	583823	11	Amplification	3.25785
8	110655581	110724596	NM_001099756	SYBU	8	110158525	110742347	1	8q23.1 - 8q23.2	583823	11	Amplification	3.25785
8	110655581	110730309	NM_017786	SYBU	8	110158525	110742347	1	8q23.1 - 8q23.2	583823	11	Amplification	3.25785
8	111048409	111056136	NM_014379	KCNV1	8	111034130	112723045	1	8q23.2 - 8q23.3	1688916	11	Amplification	3.2512
8	116489900	116750403	NM_014112	TRPS1	8	116716481	117471126	0.130221	8q23.3	754646	11	Amplification	3.18415
8	118880783	119193240	NM_000127	EXT1	8	119040148	119512380	0.489963	8q24.11 - 8q24.12	472233	11	Amplification	2.95658
8	119270876	119703366	NM_001101676	SAMD12	8	119040148	119512380	0.558405	8q24.11 - 8q24.12	472233	11	Amplification	2.95658
8	119270876	119703366	NM_001101676	SAMD12	8	119512380	120185886	0.441598	8q24.12	673507	11	Amplification	3.04875
8	119459408	119703366	NM_207506	SAMD12	8	119040148	119512380	0.217139	8q24.11 - 8q24.12	472233	11	Amplification	2.95658
8	119459408	119703366	NM_207506	SAMD12	8	119512380	120185886	0.782865	8q24.12	673507	11	Amplification	3.04875
8	120004977	120033565	NM_002546	TNFRSF11B	8	119512380	120185886	1	8q24.12	673507	11	Amplification	3.04875
8	120148605	120188384	NM_006438	COLEC10	8	119512380	120185886	0.937205	8q24.12	673507	11	Amplification	3.04875
8	124762215	124818829	NM_001003954	ANXA13	8	124811870	124828875	0.122936	8q24.13	17006	11	Amplification	2.82304
8	124762215	124818829	NM_004306	ANXA13	8	124811870	124828875	0.122936	8q24.13	17006	11	Amplification	2.82304
8	124933408	125201484	NM_001039112	FER1L6	8	124907902	125503524	1	8q24.13	595623	11	Amplification	2.81685
8	125392340	125454122	NM_194291	TMEM65	8	124907902	125503524	1	8q24.13	595623	11	Amplification	2.81685
8	126079901	126103708	NM_003129	SQLE	8	126091237	126470724	0.523858	8q24.13	379488	11	Amplification	2.81059
8	126105685	126173244	NM_014846	KIAA0196	8	126091237	126470724	1	8q24.13	379488	11	Amplification	2.81059
8	126173265	126448550	NM_173685	NSMCE2	8	126091237	126470724	1	8q24.13	379488	11	Amplification	2.81059
8	128817497	128822863	NM_002467	MYC	8	128635937	129279617	1	8q24.21	643681	11	Amplification	2.81107
8	128875961	129182682	NR_003367	PVT1	8	128635937	129279617	1	8q24.21	643681	11	Amplification	2.81107
8	128877390	128877457	NR_031609	MIR1204	8	128635937	129279617	1	8q24.21	643681	11	Amplification	2.81107
8	129042061	129042124	NR_031610	MIR1205	8	128635937	129279617	1	8q24.21	643681	11	Amplification	2.81107
8	129090326	129090385	NR_031611	MIR1206	8	128635937	129279617	1	8q24.21	643681	11	Amplification	2.81107
8	129130580	129130667	NR_031612	MIR1207	8	128635937	129279617	1	8q24.21	643681	11	Amplification	2.81107
8	129231544	129231617	NR_031613	MIR1208	8	128635937	129279617	1	8q24.21	643681	11	Amplification	2.81107
8	131133535	131483400	NM_018482	ASAP1	8	131091900	131616438	1	8q24.21 - 8q24.22	524539	11	Amplification	2.7979
8	131376783	131377962	NR_002765	ASAP1-IT	8	131091900	131616438	1	8q24.21 - 8q24.22	524539	11	Amplification	2.7979
8	131861729	132122018	NM_001115	ADCY8	8	131848967	131931112	0.266564	8q24.22	82146	11	Amplification	2.91561
8	134536273	134653366	NM_003033	ST3GAL1	8	134652085	134658750	0.0109485	8q24.22	6666	11	Amplification	2.83149
8	134536273	134653366	NM_173344	ST3GAL1	8	134652085	134658750	0.0109485	8q24.22	6666	11	Amplification	2.83149
8	140693986	140784482	NM_016601	KCNK9	8	140332420	140705417	0.126325	8q24.3	372998	11	Amplification	2.80238
5	42835739	42847782	NM_005410	SEPP1	5	42565985	42837911	0.180422	5p12	271927	9	Amplification	2.8233
5	43480111	43519750	NM_022483	C5orf28	5	43481791	43878250	0.957619	5p12	396460	9	Amplification	2.93425
5	43522560	43551031	NM_198566	C5orf34	5	43481791	43878250	1	5p12	396460	9	Amplification	2.93425
5	43562127	43592953	NM_006451	PAIP1	5	43481791	43878250	1	5p12	396460	9	Amplification	2.93425
5	43562127	43592953	NM_182789	PAIP1	5	43481791	43878250	1	5p12	396460	9	Amplification	2.93425
5	43562127	43593279	NM_183323	PAIP1	5	43481791	43878250	1	5p12	396460	9	Amplification	2.93425
5	43638548	43741426	NM_012343	NNT	5	43481791	43878250	1	5p12	396460	9	Amplification	2.93425
5	43638986	43741426	NM_182977	NNT	5	43481791	43878250	1	5p12	396460	9	Amplification	2.93425
5	44340854	44424542	NM_004465	FGF10	5	43900049	45300865	1	5p12	1400817	9	Amplification	2.96128
5	44844784	44851374	NM_016640	MRPS30	5	43900049	45300865	1	5p12	1400817	9	Amplification	2.96128
5	45295109	45731978	NM_021072	HCN1	5	43900049	45300865	0.0131778	5p12	1400817	9	Amplification	2.96128
5	45295109	45731978	NM_021072	HCN1	5	45583617	47973151	0.339602	5p12 - 5q11.1	2389535	9	Amplification	2.96094
5	39141114	39255425	NM_001465	FYB	5	39170969	41108743	0.738829	5p13.1	1937775	9	Amplification	2.82617
13	22800965	22905842	NM_014363	SACS	13	22798139	23665060	1	13q12.12	866922	10	Amplification	2.8368
13	23042723	23148233	NM_148957	TNFRSF19	13	22798139	23665060	1	13q12.12	866922	10	Amplification	2.8368
13	23051639	23141413	NM_018647	TNFRSF19	13	22798139	23665060	1	13q12.12	866922	10	Amplification	2.8368
13	23202328	23361588	NM_005932	MIPEP	13	22798139	23665060	1	13q12.12	866922	10	Amplification	2.8368
13	23361028	23364243	NM_001014442	PCOTH	13	22798139	23665060	1	13q12.12	866922	10	Amplification	2.8368
13	23361592	23364243	NM_001135816	PCOTH	13	22798139	23665060	1	13q12.12	866922	10	Amplification	2.8368
13	23363428	23369126	NM_001007537	C1QTNF9B	13	22798139	23665060	1	13q12.12	866922	10	Amplification	2.8368
13	23632861	23779213	NM_001166271	SPATA13	13	22798139	23665060	0.220016	13q12.12	866922	10	Amplification	2.8368
13	23632861	23779213	NM_153023	SPATA13	13	22798139	23665060	0.220016	13q12.12	866922	10	Amplification	2.8368
13	23634555	23634644	NR_031753	MIR2276	13	22798139	23665060	1	13q12.12	866922	10	Amplification	2.8368
13	27772483	27967266	NM_002019	FLT1	13	27813946	30210573	0.787133	13q12.3	2396628	10	Amplification	2.83223
13	27840234	27967266	NM_001160030	FLT1	13	27813946	30210573	1	13q12.3	2396628	10	Amplification	2.83223
13	27857688	27967266	NM_001159920	FLT1	13	27813946	30210573	1	13q12.3	2396628	10	Amplification	2.83223
13	27871181	27967266	NM_001160031	FLT1	13	27813946	30210573	1	13q12.3	2396628	10	Amplification	2.83223
13	28131141	28151094	NM_015932	POMP	13	27813946	30210573	1	13q12.3	2396628	10	Amplification	2.83223
13	28172218	28191151	NM_001135919	SLC46A3	13	27813946	30210573	1	13q12.3	2396628	10	Amplification	2.83223
13	28172218	28191151	NM_181785	SLC46A3	13	27813946	30210573	1	13q12.3	2396628	10	Amplification	2.83223
13	28496748	28978085	NM_001033602	MTUS2	13	27813946	30210573	1	13q12.3	2396628	10	Amplification	2.83223
13	28900777	28978085	NM_015233	MTUS2	13	27813946	30210573	1	13q12.3	2396628	10	Amplification	2.83223
13	28981551	29067826	NM_003045	SLC7A1	13	27813946	30210573	1	13q12.3	2396628	10	Amplification	2.83223
13	29236545	29322821	NM_007106	UBL3	13	27813946	30210573	1	13q12.3	2396628	10	Amplification	2.83223
13	29408668	29422626	NR_033889	LOC440131	13	27813946	30210573	1	13q12.3	2396628	10	Amplification	2.83223
13	29674767	29779164	NM_001014380	KATNAL1	13	27813946	30210573	1	13q12.3	2396628	10	Amplification	2.83223
13	29674767	29779585	NM_032116	KATNAL1	13	27813946	30210573	1	13q12.3	2396628	10	Amplification	2.83223
13	29812407	29846037	NR_024464	LOC100188949	13	27813946	30210573	1	13q12.3	2396628	10	Amplification	2.83223
13	29930879	29938082	NM_002128	HMGB1	13	27813946	30210573	1	13q12.3	2396628	10	Amplification	2.83223
13	30089830	30131687	NM_005800	USPL1	13	27813946	30210573	1	13q12.3	2396628	10	Amplification	2.83223
13	30207669	30236557	NM_001629	ALOX5AP	13	27813946	30210573	0.100557	13q12.3	2396628	10	Amplification	2.83223
13	30378312	30397710	NM_032849	C13orf33	13	30253673	30764998	1	13q12.3	511326	10	Amplification	2.78756
13	30404834	30447154	NM_152325	C13orf26	13	30253673	30764998	1	13q12.3	511326	10	Amplification	2.78756
13	30608763	30634118	NM_006644	HSPH1	13	30253673	30764998	1	13q12.3	511326	10	Amplification	2.78756
13	30672112	30804412	NM_194318	B3GALTL	13	30253673	30764998	0.702088	13q12.3	511326	10	Amplification	2.78756
13	44411384	44461614	NM_012345	NUFIP1	13	44302984	44457296	0.914037	13q14.12	154313	10	Amplification	2.77992
13	44937072	45008762	NM_031431	COG3	13	45003744	45018498	0.0700088	13q14.12	14755	10	Amplification	2.77992
13	45013433	45087876	NM_182542	FAM194B	13	45003744	45018498	0.0680512	13q14.12	14755	10	Amplification	2.77992
13	45814138	45859637	NM_025113	C13orf18	13	45701403	52442583	1	13q14.12 - 13q21.1	6741181	10	Amplification	2.7835
13	46025297	46217038	NM_001164211	LRCH1	13	45701403	52442583	1	13q14.12 - 13q21.1	6741181	10	Amplification	2.7835
13	46025297	46225177	NM_001164213	LRCH1	13	45701403	52442583	1	13q14.12 - 13q21.1	6741181	10	Amplification	2.7835
13	46025297	46217038	NM_015116	LRCH1	13	45701403	52442583	1	13q14.12 - 13q21.1	6741181	10	Amplification	2.7835
13	46243392	46269369	NM_001984	ESD	13	45701403	52442583	1	13q14.12 - 13q21.1	6741181	10	Amplification	2.7835
13	46305514	46369171	NM_000621	HTR2A	13	45701403	52442583	1	13q14.12 - 13q21.1	6741181	10	Amplification	2.7835
13	46305514	46369171	NM_001165947	HTR2A	13	45701403	52442583	1	13q14.12 - 13q21.1	6741181	10	Amplification	2.7835
13	47414792	47473464	NM_003850	SUCLA2	13	45701403	52442583	1	13q14.12 - 13q21.1	6741181	10	Amplification	2.7835
13	47509704	47519284	NM_018283	NUDT15	13	45701403	52442583	1	13q14.12 - 13q21.1	6741181	10	Amplification	2.7835
13	47548093	47567242	NM_014166	MED4	13	45701403	52442583	1	13q14.12 - 13q21.1	6741181	10	Amplification	2.7835
13	47705275	47734234	NM_021999	ITM2B	13	45701403	52442583	1	13q14.12 - 13q21.1	6741181	10	Amplification	2.7835
13	47775884	47954028	NM_000321	RB1	13	45701403	52442583	1	13q14.12 - 13q21.1	6741181	10	Amplification	2.7835
13	47883183	47899045	NM_001162497	LPAR6	13	45701403	52442583	1	13q14.12 - 13q21.1	6741181	10	Amplification	2.7835
13	47883183	47885655	NM_001162498	LPAR6	13	45701403	52442583	1	13q14.12 - 13q21.1	6741181	10	Amplification	2.7835
13	47883183	47916842	NM_005767	LPAR6	13	45701403	52442583	1	13q14.12 - 13q21.1	6741181	10	Amplification	2.7835
13	47961100	48005318	NM_001268	RCBTB2	13	45701403	52442583	1	13q14.12 - 13q21.1	6741181	10	Amplification	2.7835
13	48178952	48181500	NM_020377	CYSLTR2	13	45701403	52442583	1	13q14.12 - 13q21.1	6741181	10	Amplification	2.7835
13	48448049	48681917	NM_001079673	FNDC3A	13	45701403	52442583	1	13q14.12 - 13q21.1	6741181	10	Amplification	2.7835
13	48582450	48681917	NM_014923	FNDC3A	13	45701403	52442583	1	13q14.12 - 13q21.1	6741181	10	Amplification	2.7835
13	48692475	48694515	NM_001507	MLNR	13	45701403	52442583	1	13q14.12 - 13q21.1	6741181	10	Amplification	2.7835
13	48720048	48765624	NM_001193478	CDADC1	13	45701403	52442583	1	13q14.12 - 13q21.1	6741181	10	Amplification	2.7835
13	48720048	48765624	NM_030911	CDADC1	13	45701403	52442583	1	13q14.12 - 13q21.1	6741181	10	Amplification	2.7835
13	48720048	48765624	NR_036439	CDADC1	13	45701403	52442583	1	13q14.12 - 13q21.1	6741181	10	Amplification	2.7835
13	48780787	48916223	NM_001079670	CAB39L	13	45701403	52442583	1	13q14.12 - 13q21.1	6741181	10	Amplification	2.7835
13	48780787	48873737	NM_030925	CAB39L	13	45701403	52442583	1	13q14.12 - 13q21.1	6741181	10	Amplification	2.7835
13	48916430	48967141	NM_031915	SETDB2	13	45701403	52442583	1	13q14.12 - 13q21.1	6741181	10	Amplification	2.7835
13	48923689	48967141	NM_001160308	SETDB2	13	45701403	52442583	1	13q14.12 - 13q21.1	6741181	10	Amplification	2.7835
13	48967802	49001119	NM_001040443	PHF11	13	45701403	52442583	1	13q14.12 - 13q21.1	6741181	10	Amplification	2.7835
13	48968529	49001119	NM_001040444	PHF11	13	45701403	52442583	1	13q14.12 - 13q21.1	6741181	10	Amplification	2.7835
13	49004083	49057721	NM_018191	RCBTB1	13	45701403	52442583	1	13q14.12 - 13q21.1	6741181	10	Amplification	2.7835
13	49100436	49106010	NM_138450	ARL11	13	45701403	52442583	1	13q14.12 - 13q21.1	6741181	10	Amplification	2.7835
13	49132811	49163625	NM_032565	EBPL	13	45701403	52442583	1	13q14.12 - 13q21.1	6741181	10	Amplification	2.7835
13	49171444	49265059	NM_002267	KPNA3	13	45701403	52442583	1	13q14.12 - 13q21.1	6741181	10	Amplification	2.7835
13	49362546	49365518	NR_003268	CTAGE10P	13	45701403	52442583	1	13q14.12 - 13q21.1	6741181	10	Amplification	2.7835
13	49384843	49408627	NM_001127482	C13orf1	13	45701403	52442583	1	13q14.12 - 13q21.1	6741181	10	Amplification	2.7835
13	49384843	49408627	NM_020456	C13orf1	13	45701403	52442583	1	13q14.12 - 13q21.1	6741181	10	Amplification	2.7835
13	49384843	49408627	NR_023351	C13orf1	13	45701403	52442583	1	13q14.12 - 13q21.1	6741181	10	Amplification	2.7835
13	49454689	49597679	NR_002612	DLEU2	13	45701403	52442583	1	13q14.12 - 13q21.1	6741181	10	Amplification	2.7835
13	49468552	49468639	NR_037407	MIR3613	13	45701403	52442583	1	13q14.12 - 13q21.1	6741181	10	Amplification	2.7835
13	49469144	49490605	NM_001007278	TRIM13	13	45701403	52442583	1	13q14.12 - 13q21.1	6741181	10	Amplification	2.7835
13	49469144	49490605	NM_005798	TRIM13	13	45701403	52442583	1	13q14.12 - 13q21.1	6741181	10	Amplification	2.7835
13	49469144	49490605	NM_052811	TRIM13	13	45701403	52442583	1	13q14.12 - 13q21.1	6741181	10	Amplification	2.7835
13	49469144	49490605	NM_213590	TRIM13	13	45701403	52442583	1	13q14.12 - 13q21.1	6741181	10	Amplification	2.7835
13	49487391	49493060	NM_173605	KCNRG	13	45701403	52442583	1	13q14.12 - 13q21.1	6741181	10	Amplification	2.7835
13	49487391	49493060	NM_199464	KCNRG	13	45701403	52442583	1	13q14.12 - 13q21.1	6741181	10	Amplification	2.7835
13	49521110	49521199	NR_029486	MIR16-1	13	45701403	52442583	1	13q14.12 - 13q21.1	6741181	10	Amplification	2.7835
13	49521256	49521339	NR_029485	MIR15A	13	45701403	52442583	1	13q14.12 - 13q21.1	6741181	10	Amplification	2.7835
13	49554415	49577435	NR_002605	DLEU1	13	45701403	52442583	1	13q14.12 - 13q21.1	6741181	10	Amplification	2.7835
13	49644155	49645753	NR_002183	ST13P4	13	45701403	52442583	1	13q14.12 - 13q21.1	6741181	10	Amplification	2.7835
13	50184760	50315887	NM_198989	DLEU7	13	45701403	52442583	1	13q14.12 - 13q21.1	6741181	10	Amplification	2.7835
13	50381893	50442598	NM_001142279	RNASEH2B	13	45701403	52442583	1	13q14.12 - 13q21.1	6741181	10	Amplification	2.7835
13	50381893	50428903	NM_024570	RNASEH2B	13	45701403	52442583	1	13q14.12 - 13q21.1	6741181	10	Amplification	2.7835
13	50466648	50538295	NR_003923	GUCY1B2	13	45701403	52442583	1	13q14.12 - 13q21.1	6741181	10	Amplification	2.7835
13	50694508	50753618	NM_145019	FAM124A	13	45701403	52442583	1	13q14.12 - 13q21.1	6741181	10	Amplification	2.7835
13	50813169	50834241	NM_001101320	SERPINE3	13	45701403	52442583	1	13q14.12 - 13q21.1	6741181	10	Amplification	2.7835
13	50833702	50925277	NM_001039937	INTS6	13	45701403	52442583	1	13q14.12 - 13q21.1	6741181	10	Amplification	2.7835
13	50833702	50925277	NM_012141	INTS6	13	45701403	52442583	1	13q14.12 - 13q21.1	6741181	10	Amplification	2.7835
13	50921622	50925277	NM_001039938	INTS6	13	45701403	52442583	1	13q14.12 - 13q21.1	6741181	10	Amplification	2.7835
13	51056485	51234173	NM_052950	WDFY2	13	45701403	52442583	1	13q14.12 - 13q21.1	6741181	10	Amplification	2.7835
13	51240132	51276295	NM_024705	DHRS12	13	45701403	52442583	1	13q14.12 - 13q21.1	6741181	10	Amplification	2.7835
13	51242921	51276236	NM_001031719	DHRS12	13	45701403	52442583	1	13q14.12 - 13q21.1	6741181	10	Amplification	2.7835
13	51285484	51317288	NR_027047	NCRNA00282	13	45701403	52442583	1	13q14.12 - 13q21.1	6741181	10	Amplification	2.7835
13	51285484	51317288	NR_027048	NCRNA00282	13	45701403	52442583	1	13q14.12 - 13q21.1	6741181	10	Amplification	2.7835
13	51334118	51338374	NM_031290	CCDC70	13	45701403	52442583	1	13q14.12 - 13q21.1	6741181	10	Amplification	2.7835
13	51404806	51483632	NM_000053	ATP7B	13	45701403	52442583	1	13q14.12 - 13q21.1	6741181	10	Amplification	2.7835
13	51404806	51483632	NM_001005918	ATP7B	13	45701403	52442583	1	13q14.12 - 13q21.1	6741181	10	Amplification	2.7835
13	51484524	51501782	NM_001004127	ALG11	13	45701403	52442583	1	13q14.12 - 13q21.1	6741181	10	Amplification	2.7835
13	51484524	51501782	NR_036571	ALG11	13	45701403	52442583	1	13q14.12 - 13q21.1	6741181	10	Amplification	2.7835
13	51496828	51505738	NM_021645	UTP14C	13	45701403	52442583	1	13q14.12 - 13q21.1	6741181	10	Amplification	2.7835
13	51536901	51601216	NM_199289	NEK5	13	45701403	52442583	1	13q14.12 - 13q21.1	6741181	10	Amplification	2.7835
13	51604780	51631998	NM_001146099	NEK3	13	45701403	52442583	1	13q14.12 - 13q21.1	6741181	10	Amplification	2.7835
13	51604780	51631998	NM_002498	NEK3	13	45701403	52442583	1	13q14.12 - 13q21.1	6741181	10	Amplification	2.7835
13	51604780	51631512	NM_152720	NEK3	13	45701403	52442583	1	13q14.12 - 13q21.1	6741181	10	Amplification	2.7835
13	51604780	51631998	NR_027415	NEK3	13	45701403	52442583	1	13q14.12 - 13q21.1	6741181	10	Amplification	2.7835
13	51639848	51666604	NR_002816	THSD1P1	13	45701403	52442583	1	13q14.12 - 13q21.1	6741181	10	Amplification	2.7835
13	51691482	51762121	NR_033775	TPTE2P2	13	45701403	52442583	1	13q14.12 - 13q21.1	6741181	10	Amplification	2.7835
13	51849304	51878631	NM_018676	THSD1	13	45701403	52442583	1	13q14.12 - 13q21.1	6741181	10	Amplification	2.7835
13	51849304	51878631	NM_199263	THSD1	13	45701403	52442583	1	13q14.12 - 13q21.1	6741181	10	Amplification	2.7835
13	51884738	51922765	NM_016075	VPS36	13	45701403	52442583	1	13q14.12 - 13q21.1	6741181	10	Amplification	2.7835
13	51927496	51948765	NM_001098525	CKAP2	13	45701403	52442583	1	13q14.12 - 13q21.1	6741181	10	Amplification	2.7835
13	51927496	51948765	NM_018204	CKAP2	13	45701403	52442583	1	13q14.12 - 13q21.1	6741181	10	Amplification	2.7835
13	51961129	52059227	NR_002793	TPTE2P3	13	45701403	52442583	1	13q14.12 - 13q21.1	6741181	10	Amplification	2.7835
13	52089606	52115921	NM_001011724	HNRNPA1L2	13	45701403	52442583	1	13q14.12 - 13q21.1	6741181	10	Amplification	2.7835
13	52089606	52115921	NM_001011725	HNRNPA1L2	13	45701403	52442583	1	13q14.12 - 13q21.1	6741181	10	Amplification	2.7835
13	52124832	52160435	NM_001130912	SUGT1	13	45701403	52442583	1	13q14.12 - 13q21.1	6741181	10	Amplification	2.7835
13	52124832	52160435	NM_006704	SUGT1	13	45701403	52442583	1	13q14.12 - 13q21.1	6741181	10	Amplification	2.7835
13	52175400	52211949	NM_001011705	LECT1	13	45701403	52442583	1	13q14.12 - 13q21.1	6741181	10	Amplification	2.7835
13	52175400	52211949	NM_007015	LECT1	13	45701403	52442583	1	13q14.12 - 13q21.1	6741181	10	Amplification	2.7835
13	52282186	52282277	NR_031582	MIR759	13	45701403	52442583	1	13q14.12 - 13q21.1	6741181	10	Amplification	2.7835
13	52316110	52320776	NM_002590	PCDH8	13	45701403	52442583	1	13q14.12 - 13q21.1	6741181	10	Amplification	2.7835
13	52316110	52320776	NM_032949	PCDH8	13	45701403	52442583	1	13q14.12 - 13q21.1	6741181	10	Amplification	2.7835
13	92677079	93858275	NM_005708	GPC6	13	93720699	94506556	0.116473	13q31.3 - 13q32.1	785858	10	Amplification	2.87845
13	93889842	93929938	NM_001129889	DCT	13	93720699	94506556	1	13q31.3 - 13q32.1	785858	10	Amplification	2.87845
13	93889842	93929938	NM_001922	DCT	13	93720699	94506556	1	13q31.3 - 13q32.1	785858	10	Amplification	2.87845
13	94024309	94046513	NM_014305	TGDS	13	93720699	94506556	1	13q31.3 - 13q32.1	785858	10	Amplification	2.87845
13	94052105	94079948	NM_180989	GPR180	13	93720699	94506556	1	13q31.3 - 13q32.1	785858	10	Amplification	2.87845
13	94159880	94162391	NM_007084	SOX21	13	93720699	94506556	1	13q31.3 - 13q32.1	785858	10	Amplification	2.87845
13	94470084	94751689	NM_005845	ABCC4	13	93720699	94506556	0.129518	13q31.3 - 13q32.1	785858	10	Amplification	2.87845
13	105826912	105828142	NR_034119	LOC728192	13	105602000	106356577	1	13q33.2 - 13q33.3	754578	10	Amplification	2.84095
13	105940097	105985339	NM_004093	EFNB2	13	105602000	106356577	1	13q33.2 - 13q33.3	754578	10	Amplification	2.84095
13	105993663	106018516	NM_018011	ARGLU1	13	105602000	106356577	1	13q33.2 - 13q33.3	754578	10	Amplification	2.84095
13	108046501	108658357	NM_015011	MYO16	13	108649581	108813413	0.0143449	13q33.3	163833	10	Amplification	2.85288
13	108079572	108658357	NM_001198950	MYO16	13	108649581	108813413	0.0151645	13q33.3	163833	10	Amplification	2.85288
9	7786491	7789800	NM_033428	C9orf123	9	7265345	8198911	1	9p24.1	933567	10	Amplification	2.75105
9	8304246	8723947	NM_001040712	PTPRD	9	8198911	8876343	1	9p24.1	677433	10	Amplification	2.85771
9	8304246	8723947	NM_001171025	PTPRD	9	8198911	8876343	1	9p24.1	677433	10	Amplification	2.85771
9	8304246	10602724	NM_002839	PTPRD	9	8198911	8876343	0.248903	9p24.1	677433	10	Amplification	2.85771
9	8304246	8723947	NM_130391	PTPRD	9	8198911	8876343	1	9p24.1	677433	10	Amplification	2.85771
9	8304246	8723947	NM_130392	PTPRD	9	8198911	8876343	1	9p24.1	677433	10	Amplification	2.85771
9	8304246	8723947	NM_130393	PTPRD	9	8198911	8876343	1	9p24.1	677433	10	Amplification	2.85771
9	12683386	12700267	NM_000550	TYRP1	9	12670096	12707257	1	9p23	37162	10	Amplification	2.8966
9	18917891	19023257	NM_153707	FAM154A	9	19011407	19491439	0.112474	9p22.1	480033	10	Amplification	2.74058
9	19039372	19041022	NM_006570	RRAGA	9	19011407	19491439	1	9p22.1	480033	10	Amplification	2.74058
9	19043141	19092903	NM_017645	HAUS6	9	19011407	19491439	1	9p22.1	480033	10	Amplification	2.74058
9	19053654	19053785	NR_003009	SCARNA8	9	19011407	19491439	1	9p22.1	480033	10	Amplification	2.74058
9	19105759	19117574	NM_001122	PLIN2	9	19011407	19491439	1	9p22.1	480033	10	Amplification	2.74058
9	19280749	19364140	NM_017925	DENND4C	9	19011407	19491439	1	9p22.1	480033	10	Amplification	2.74058
9	19366254	19370236	NM_001010	RPS6	9	19011407	19491439	1	9p22.1	480033	10	Amplification	2.74058
9	19398925	19442501	NM_001010887	ACER2	9	19011407	19491439	1	9p22.1	480033	10	Amplification	2.74058
9	27099147	27220173	NM_000459	TEK	9	27182215	27273098	0.313641	9p21.2	90884	10	Amplification	2.74073
9	27235682	27272792	NR_026679	NCRNA00032	9	27182215	27273098	1	9p21.2	90884	10	Amplification	2.74073
9	27235682	27272792	NR_026687	NCRNA00032	9	27182215	27273098	1	9p21.2	90884	10	Amplification	2.74073
9	27536544	27563482	NM_018325	C9orf72	9	27541613	27566464	0.811834	9p21.2	24852	10	Amplification	2.81603
9	27550499	27563843	NM_145005	C9orf72	9	27541613	27566464	1	9p21.2	24852	10	Amplification	2.81603
9	27938528	28709304	NM_152570	LINGO2	9	27648938	28193918	0.331342	9p21.2 - 9p21.1	544981	10	Amplification	2.81671
9	27938528	28709304	NM_152570	LINGO2	9	28193918	31517021	0.668659	9p21.1	3323104	10	Amplification	2.90862
9	28853624	28853705	NR_030597	MIR876	9	28193918	31517021	1	9p21.1	3323104	10	Amplification	2.90862
9	28878877	28878954	NR_030618	MIR873	9	28193918	31517021	1	9p21.1	3323104	10	Amplification	2.90862
8	90839110	90872434	NM_003821	RIPK2	8	90736976	94200670	1	8q21.3 - 8q22.1	3463695	10	Amplification	2.94771
8	90983269	91009271	NM_004337	OSGIN2	8	90736976	94200670	1	8q21.3 - 8q22.1	3463695	10	Amplification	2.94771
8	90983935	91009271	NM_001126111	OSGIN2	8	90736976	94200670	1	8q21.3 - 8q22.1	3463695	10	Amplification	2.94771
8	91014740	91066076	NM_002485	NBN	8	90736976	94200670	1	8q21.3 - 8q22.1	3463695	10	Amplification	2.94771
8	91082756	91133404	NM_001359	DECR1	8	90736976	94200670	1	8q21.3 - 8q22.1	3463695	10	Amplification	2.94771
8	91140014	91164284	NM_004929	CALB1	8	90736976	94200670	1	8q21.3 - 8q22.1	3463695	10	Amplification	2.94771
8	91703399	91727310	NM_001008495	TMEM64	8	90736976	94200670	1	8q21.3 - 8q22.1	3463695	10	Amplification	2.94771
8	91703399	91727310	NM_001146273	TMEM64	8	90736976	94200670	1	8q21.3 - 8q22.1	3463695	10	Amplification	2.94771
8	91873097	92040807	NM_022351	NECAB1	8	90736976	94200670	1	8q21.3 - 8q22.1	3463695	10	Amplification	2.94771
8	92039882	92066662	NM_001190972	LOC100127983	8	90736976	94200670	1	8q21.3 - 8q22.1	3463695	10	Amplification	2.94771
8	92075675	92122380	NM_018710	TMEM55A	8	90736976	94200670	1	8q21.3 - 8q22.1	3463695	10	Amplification	2.94771
8	92151600	92168500	NM_016023	OTUD6B	8	90736976	94200670	1	8q21.3 - 8q22.1	3463695	10	Amplification	2.94771
8	92184023	92300641	NM_001129890	LRRC69	8	90736976	94200670	1	8q21.3 - 8q22.1	3463695	10	Amplification	2.94771
8	92330692	92479555	NM_052832	SLC26A7	8	90736976	94200670	1	8q21.3 - 8q22.1	3463695	10	Amplification	2.94771
8	92330692	92476123	NM_134266	SLC26A7	8	90736976	94200670	1	8q21.3 - 8q22.1	3463695	10	Amplification	2.94771
8	93036371	93177059	NM_001198625	RUNX1T1	8	90736976	94200670	1	8q21.3 - 8q22.1	3463695	10	Amplification	2.94771
8	93036371	93177059	NM_001198626	RUNX1T1	8	90736976	94200670	1	8q21.3 - 8q22.1	3463695	10	Amplification	2.94771
8	93036371	93177059	NM_001198627	RUNX1T1	8	90736976	94200670	1	8q21.3 - 8q22.1	3463695	10	Amplification	2.94771
8	93036371	93181093	NM_001198628	RUNX1T1	8	90736976	94200670	1	8q21.3 - 8q22.1	3463695	10	Amplification	2.94771
8	93036371	93176667	NM_001198629	RUNX1T1	8	90736976	94200670	1	8q21.3 - 8q22.1	3463695	10	Amplification	2.94771
8	93036371	93176667	NM_001198630	RUNX1T1	8	90736976	94200670	1	8q21.3 - 8q22.1	3463695	10	Amplification	2.94771
8	93036371	93177059	NM_001198631	RUNX1T1	8	90736976	94200670	1	8q21.3 - 8q22.1	3463695	10	Amplification	2.94771
8	93036371	93176667	NM_001198632	RUNX1T1	8	90736976	94200670	1	8q21.3 - 8q22.1	3463695	10	Amplification	2.94771
8	93036371	93184631	NM_001198633	RUNX1T1	8	90736976	94200670	1	8q21.3 - 8q22.1	3463695	10	Amplification	2.94771
8	93036371	93177059	NM_001198634	RUNX1T1	8	90736976	94200670	1	8q21.3 - 8q22.1	3463695	10	Amplification	2.94771
8	93036371	93177059	NM_001198679	RUNX1T1	8	90736976	94200670	1	8q21.3 - 8q22.1	3463695	10	Amplification	2.94771
8	93036371	93144368	NM_004349	RUNX1T1	8	90736976	94200670	1	8q21.3 - 8q22.1	3463695	10	Amplification	2.94771
8	93036371	93184631	NM_175634	RUNX1T1	8	90736976	94200670	1	8q21.3 - 8q22.1	3463695	10	Amplification	2.94771
8	93036371	93176667	NM_175635	RUNX1T1	8	90736976	94200670	1	8q21.3 - 8q22.1	3463695	10	Amplification	2.94771
8	93036371	93099085	NM_175636	RUNX1T1	8	90736976	94200670	1	8q21.3 - 8q22.1	3463695	10	Amplification	2.94771
8	93964934	94047549	NM_001171795	C8orf83	8	90736976	94200670	1	8q21.3 - 8q22.1	3463695	10	Amplification	2.94771
8	93964934	94047549	NM_001171796	C8orf83	8	90736976	94200670	1	8q21.3 - 8q22.1	3463695	10	Amplification	2.94771
8	93964934	94047549	NM_001171797	C8orf83	8	90736976	94200670	1	8q21.3 - 8q22.1	3463695	10	Amplification	2.94771
8	93964934	94047549	NM_001171798	C8orf83	8	90736976	94200670	1	8q21.3 - 8q22.1	3463695	10	Amplification	2.94771
8	93964934	94047549	NM_001171799	C8orf83	8	90736976	94200670	1	8q21.3 - 8q22.1	3463695	10	Amplification	2.94771
8	93964934	94047442	NM_001191035	C8orf83	8	90736976	94200670	1	8q21.3 - 8q22.1	3463695	10	Amplification	2.94771
8	93964934	94046994	NM_001191036	C8orf83	8	90736976	94200670	1	8q21.3 - 8q22.1	3463695	10	Amplification	2.94771
8	95569776	95634865	NM_015496	KIAA1429	8	95601140	96323151	0.518144	8q22.1	722012	10	Amplification	2.8843
8	95592382	95634865	NM_183009	KIAA1429	8	95601140	96323151	0.793852	8q22.1	722012	10	Amplification	2.8843
8	95718689	95720872	NR_034034	LOC100288748	8	95601140	96323151	1	8q22.1	722012	10	Amplification	2.8843
8	95722540	95788871	NM_001034915	ESRP1	8	95601140	96323151	1	8q22.1	722012	10	Amplification	2.8843
8	95722540	95788871	NM_001122825	ESRP1	8	95601140	96323151	1	8q22.1	722012	10	Amplification	2.8843
8	95722540	95788871	NM_001122826	ESRP1	8	95601140	96323151	1	8q22.1	722012	10	Amplification	2.8843
8	95722540	95788871	NM_001122827	ESRP1	8	95601140	96323151	1	8q22.1	722012	10	Amplification	2.8843
8	95722540	95788871	NM_017697	ESRP1	8	95601140	96323151	1	8q22.1	722012	10	Amplification	2.8843
8	95801279	95875253	NM_181787	DPY19L4	8	95601140	96323151	1	8q22.1	722012	10	Amplification	2.8843
8	95904710	95961898	NM_017864	INTS8	8	95601140	96323151	1	8q22.1	722012	10	Amplification	2.8843
8	95961629	95976659	NM_057749	CCNE2	8	95601140	96323151	1	8q22.1	722012	10	Amplification	2.8843
8	96007376	96030792	NM_001135733	TP53INP1	8	95601140	96323151	1	8q22.1	722012	10	Amplification	2.8843
8	96007376	96030792	NM_033285	TP53INP1	8	95601140	96323151	1	8q22.1	722012	10	Amplification	2.8843
8	96106397	96140115	NM_152416	C8orf38	8	95601140	96323151	1	8q22.1	722012	10	Amplification	2.8843
8	96154315	96154401	NR_037484	MIR3150B	8	95601140	96323151	1	8q22.1	722012	10	Amplification	2.8843
8	96154318	96154398	NR_036105	MIR3150	8	95601140	96323151	1	8q22.1	722012	10	Amplification	2.8843
8	96215125	96238090	NM_024613	PLEKHF2	8	95601140	96323151	1	8q22.1	722012	10	Amplification	2.8843
8	98725583	98811665	NM_178812	MTDH	8	98809962	99200673	0.0197948	8q22.1 - 8q22.2	390712	10	Amplification	2.78508
8	98856985	98934007	NM_018407	LAPTM4B	8	98809962	99200673	1	8q22.1 - 8q22.2	390712	10	Amplification	2.78508
8	98950487	99118123	NM_002380	MATN2	8	98809962	99200673	1	8q22.1 - 8q22.2	390712	10	Amplification	2.78508
8	98950487	99118123	NM_030583	MATN2	8	98809962	99200673	1	8q22.1 - 8q22.2	390712	10	Amplification	2.78508
8	99123118	99126950	NM_000989	RPL30	8	98809962	99200673	1	8q22.1 - 8q22.2	390712	10	Amplification	2.78508
8	99123490	99123622	NR_002581	SNORA72	8	98809962	99200673	1	8q22.1 - 8q22.2	390712	10	Amplification	2.78508
8	99145926	99175015	NM_001170806	C8orf47	8	98809962	99200673	1	8q22.1 - 8q22.2	390712	10	Amplification	2.78508
8	99145926	99175015	NM_173549	C8orf47	8	98809962	99200673	1	8q22.1 - 8q22.2	390712	10	Amplification	2.78508
8	99183743	99198595	NM_005836	HRSP12	8	98809962	99200673	1	8q22.1 - 8q22.2	390712	10	Amplification	2.78508
8	99198697	99241246	NM_001145860	POP1	8	98809962	99200673	0.046463	8q22.1 - 8q22.2	390712	10	Amplification	2.78508
8	99198697	99241246	NM_001145861	POP1	8	98809962	99200673	0.046463	8q22.1 - 8q22.2	390712	10	Amplification	2.78508
8	99199244	99241246	NM_015029	POP1	8	98809962	99200673	0.0340452	8q22.1 - 8q22.2	390712	10	Amplification	2.78508
8	100094670	100291192	NM_015243	VPS13B	8	100182645	101159635	0.552342	8q22.2	976991	10	Amplification	2.78508
8	100094670	100958985	NM_017890	VPS13B	8	100182645	101159635	0.898214	8q22.2	976991	10	Amplification	2.78508
8	100094670	100958985	NM_152564	VPS13B	8	100182645	101159635	0.898214	8q22.2	976991	10	Amplification	2.78508
8	100094670	100203164	NM_181661	VPS13B	8	100182645	101159635	0.189133	8q22.2	976991	10	Amplification	2.78508
8	100618040	100618135	NR_030329	MIR599	8	100182645	101159635	1	8q22.2	976991	10	Amplification	2.78508
8	100618190	100618266	NR_030596	MIR875	8	100182645	101159635	1	8q22.2	976991	10	Amplification	2.78508
8	100959399	100975419	NM_004374	COX6C	8	100182645	101159635	1	8q22.2	976991	10	Amplification	2.78508
8	101042452	101187521	NM_015668	RGS22	8	100182645	101159635	0.807776	8q22.2	976991	10	Amplification	2.78508
8	103633024	103642422	NM_024410	ODF1	8	103640898	104079991	0.162251	8q22.3	439094	10	Amplification	2.74907
8	103730181	103735345	NM_001032282	KLF10	8	103640898	104079991	1	8q22.3	439094	10	Amplification	2.74907
8	103730181	103737160	NM_005655	KLF10	8	103640898	104079991	1	8q22.3	439094	10	Amplification	2.74907
8	103907712	103945574	NM_015878	AZIN1	8	103640898	104079991	1	8q22.3	439094	10	Amplification	2.74907
8	103907712	103945574	NM_148174	AZIN1	8	103640898	104079991	1	8q22.3	439094	10	Amplification	2.74907
8	106400323	106885944	NM_012082	ZFPM2	8	106020078	106547534	0.303141	8q22.3 - 8q23.1	527457	10	Amplification	3.21888
8	107351582	107834098	NM_001198533	OXR1	8	107752526	107887450	0.169057	8q23.1	134925	10	Amplification	3.21888
8	107351582	107834098	NM_018002	OXR1	8	107752526	107887450	0.169057	8q23.1	134925	10	Amplification	3.21888
8	107529328	107834098	NM_001198532	OXR1	8	107752526	107887450	0.267653	8q23.1	134925	10	Amplification	3.21888
8	107739212	107834098	NM_181354	OXR1	8	107752526	107887450	0.859686	8q23.1	134925	10	Amplification	3.21888
8	107807511	107834098	NM_001198534	OXR1	8	107752526	107887450	1	8q23.1	134925	10	Amplification	3.21888
8	107807511	107834098	NM_001198535	OXR1	8	107752526	107887450	1	8q23.1	134925	10	Amplification	3.21888
8	107840887	107851649	NM_139166	ABRA	8	107752526	107887450	1	8q23.1	134925	10	Amplification	3.21888
8	108980720	109165090	NM_178565	RSPO2	8	108723963	109170469	1	8q23.1	446507	10	Amplification	3.07742
8	109283148	109330136	NM_001568	EIF3E	8	109170469	110158525	1	8q23.1	988057	10	Amplification	3.30614
8	109525029	109568313	NM_014673	TTC35	8	109170469	110158525	1	8q23.1	988057	10	Amplification	3.30614
8	109864522	109868947	NM_153015	TMEM74	8	109170469	110158525	1	8q23.1	988057	10	Amplification	3.30614
8	123863082	124055937	NM_014943	ZHX2	8	124012768	124811870	0.223846	8q24.13	799103	10	Amplification	2.80993
8	124094749	124123830	NM_001134671	DERL1	8	124012768	124811870	1	8q24.13	799103	10	Amplification	2.80993
8	124094749	124123830	NM_024295	DERL1	8	124012768	124811870	1	8q24.13	799103	10	Amplification	2.80993
8	124154101	124233574	NM_001145088	WDR67	8	124012768	124811870	1	8q24.13	799103	10	Amplification	2.80993
8	124154101	124233574	NM_145647	WDR67	8	124012768	124811870	1	8q24.13	799103	10	Amplification	2.80993
8	124263933	124290389	NM_032899	FAM83A	8	124012768	124811870	1	8q24.13	799103	10	Amplification	2.80993
8	124263933	124291500	NM_207006	FAM83A	8	124012768	124811870	1	8q24.13	799103	10	Amplification	2.80993
8	124282593	124284165	NR_024479	LOC100131726	8	124012768	124811870	1	8q24.13	799103	10	Amplification	2.80993
8	124301412	124322799	NM_032847	C8orf76	8	124012768	124811870	1	8q24.13	799103	10	Amplification	2.80993
8	124329877	124355729	NM_001017926	ZHX1	8	124012768	124811870	1	8q24.13	799103	10	Amplification	2.80993
8	124329877	124355729	NM_007222	ZHX1	8	124012768	124811870	1	8q24.13	799103	10	Amplification	2.80993
8	124401272	124477887	NM_014109	ATAD2	8	124012768	124811870	1	8q24.13	799103	10	Amplification	2.80993
8	124498146	124523442	NM_018024	WDYHV1	8	124012768	124811870	1	8q24.13	799103	10	Amplification	2.80993
8	124584539	124622628	NM_058229	FBXO32	8	124012768	124811870	1	8q24.13	799103	10	Amplification	2.80993
8	124584539	124613565	NM_148177	FBXO32	8	124012768	124811870	1	8q24.13	799103	10	Amplification	2.80993
8	124727096	124734372	NM_001081675	KLHL38	8	124012768	124811870	1	8q24.13	799103	10	Amplification	2.80993
8	124762215	124818829	NM_001003954	ANXA13	8	124012768	124811870	0.877082	8q24.13	799103	10	Amplification	2.80993
8	124762215	124818829	NM_004306	ANXA13	8	124012768	124811870	0.877082	8q24.13	799103	10	Amplification	2.80993
8	125532229	125534448	NM_017956	TRMT12	8	125503524	126091237	1	8q24.13	587714	10	Amplification	2.78707
8	125556189	125570041	NM_007218	RNF139	8	125503524	126091237	1	8q24.13	587714	10	Amplification	2.78707
8	125569916	125620511	NM_001146160	TATDN1	8	125503524	126091237	1	8q24.13	587714	10	Amplification	2.78707
8	125569916	125620511	NM_032026	TATDN1	8	125503524	126091237	1	8q24.13	587714	10	Amplification	2.78707
8	125569916	125620511	NR_027427	TATDN1	8	125503524	126091237	1	8q24.13	587714	10	Amplification	2.78707
8	125620524	125631409	NM_005005	NDUFB9	8	125503524	126091237	1	8q24.13	587714	10	Amplification	2.78707
8	125632209	125809912	NM_014751	MTSS1	8	125503524	126091237	1	8q24.13	587714	10	Amplification	2.78707
8	126023431	126032519	NR_027321	LOC157381	8	125503524	126091237	1	8q24.13	587714	10	Amplification	2.78707
8	126054720	126060812	NM_152412	ZNF572	8	125503524	126091237	1	8q24.13	587714	10	Amplification	2.78707
8	126079901	126103708	NM_003129	SQLE	8	125503524	126091237	0.476184	8q24.13	587714	10	Amplification	2.78707
8	126511745	126519827	NM_025195	TRIB1	8	126470724	126739083	1	8q24.13	268360	10	Amplification	2.79624
8	130829624	130868317	NM_031415	GSDMC	8	130744528	131091900	1	8q24.21	347373	10	Amplification	2.79813
8	130922898	131021183	NM_016623	FAM49B	8	130744528	131091900	1	8q24.21	347373	10	Amplification	2.79813
8	133948387	134216326	NM_003235	TG	8	133938572	134095870	0.550437	8q24.22	157299	10	Amplification	2.9007
8	140693986	140784482	NM_016601	KCNK9	8	140705417	140708061	0.0292275	8q24.3	2645	10	Amplification	2.79983
5	39141114	39255425	NM_199335	FYB	5	39170969	41108743	0.738829	5p13.1	1937775	9	Amplification	2.82617
5	39320135	39400413	NM_001737	C9	5	39170969	41108743	1	5p13.1	1937775	9	Amplification	2.82617
5	39407537	39461093	NM_001343	DAB2	5	39170969	41108743	1	5p13.1	1937775	9	Amplification	2.82617
5	40715789	40729595	NM_000958	PTGER4	5	39170969	41108743	1	5p13.1	1937775	9	Amplification	2.82617
5	40747435	40791830	NM_012382	TTC33	5	39170969	41108743	1	5p13.1	1937775	9	Amplification	2.82617
5	40795238	40834055	NM_006251	PRKAA1	5	39170969	41108743	1	5p13.1	1937775	9	Amplification	2.82617
5	40795238	40834055	NM_206907	PRKAA1	5	39170969	41108743	1	5p13.1	1937775	9	Amplification	2.82617
20	26032052	26042678	NR_003678	C20orf191	20	26028659	26148979	1	20p11.1	120321	9	Amplification	2.7882
20	26136822	26136915	NR_030386	MIR663	20	26028659	26148979	1	20p11.1	120321	9	Amplification	2.7882
13	19875806	19998013	NM_015974	CRYL1	13	19857036	19885929	0.0828424	13q12.11	28894	9	Amplification	2.7612
13	20039208	20163577	NM_006531	IFT88	13	20122297	21599925	0.331921	13q12.11	1477629	9	Amplification	2.74151
13	20039208	20163577	NM_175605	IFT88	13	20122297	21599925	0.331921	13q12.11	1477629	9	Amplification	2.74151
13	20175482	20195238	NM_138284	IL17D	13	20122297	21599925	1	13q12.11	1477629	9	Amplification	2.74151
13	20201073	20246058	NM_174928	N6AMT2	13	20122297	21599925	1	13q12.11	1477629	9	Amplification	2.74151
13	20249468	20374914	NM_022459	XPO4	13	20122297	21599925	1	13q12.11	1477629	9	Amplification	2.74151
13	20445176	20533723	NM_014572	LATS2	13	20122297	21599925	1	13q12.11	1477629	9	Amplification	2.74151
13	20612653	20621225	NM_005870	SAP18	13	20122297	21599925	1	13q12.11	1477629	9	Amplification	2.74151
13	20625734	20648742	NM_001166017	SKA3	13	20122297	21599925	1	13q12.11	1477629	9	Amplification	2.74151
13	20625734	20648742	NM_145061	SKA3	13	20122297	21599925	1	13q12.11	1477629	9	Amplification	2.74151
13	20648372	20651221	NM_024026	MRP63	13	20122297	21599925	1	13q12.11	1477629	9	Amplification	2.74151
13	20844710	20931509	NM_153251	ZDHHC20	13	20122297	21599925	1	13q12.11	1477629	9	Amplification	2.74151
13	20964828	21076356	NM_152726	EFHA1	13	20122297	21599925	1	13q12.11	1477629	9	Amplification	2.74151
13	21143215	21176641	NM_002010	FGF9	13	20122297	21599925	1	13q12.11	1477629	9	Amplification	2.74151
13	30207669	30236557	NM_001629	ALOX5AP	13	30210573	30253673	0.899477	13q12.3	43101	9	Amplification	2.80908
13	45013433	45087876	NM_182542	FAM194B	13	45018498	45701403	0.931962	13q14.12	682906	9	Amplification	2.70882
13	45174447	45186695	NM_152719	SPERT	13	45018498	45701403	1	13q14.12	682906	9	Amplification	2.70882
13	45252417	45323848	NM_198849	SIAH3	13	45018498	45701403	1	13q14.12	682906	9	Amplification	2.70882
13	45434315	45524896	NM_015070	ZC3H13	13	45018498	45701403	1	13q14.12	682906	9	Amplification	2.70882
13	45525323	45577213	NM_001872	CPB2	13	45018498	45701403	1	13q14.12	682906	9	Amplification	2.70882
13	45525323	45577213	NM_016413	CPB2	13	45018498	45701403	1	13q14.12	682906	9	Amplification	2.70882
13	45598059	45654461	NM_002298	LCP1	13	45018498	45701403	1	13q14.12	682906	9	Amplification	2.70882
13	94470084	94751689	NM_005845	ABCC4	13	94506556	94570349	0.226536	13q32.1	63794	9	Amplification	2.88893
13	94546026	94751689	NM_001105515	ABCC4	13	94506556	94570349	0.118271	13q32.1	63794	9	Amplification	2.88893
13	94883854	95030012	NM_001160100	CLDN10	13	94963225	95916655	0.456954	13q32.1	953431	9	Amplification	2.82166
13	94883854	95030012	NM_182848	CLDN10	13	94963225	95916655	0.456954	13q32.1	953431	9	Amplification	2.82166
13	95002948	95030012	NM_006984	CLDN10	13	94963225	95916655	1	13q32.1	953431	9	Amplification	2.82166
13	95028457	95094959	NM_014934	DZIP1	13	94963225	95916655	1	13q32.1	953431	9	Amplification	2.82166
13	95028457	95094959	NM_198968	DZIP1	13	94963225	95916655	1	13q32.1	953431	9	Amplification	2.82166
13	95127394	95245245	NM_006260	DNAJC3	13	94963225	95916655	1	13q32.1	953431	9	Amplification	2.82166
13	95251837	95503738	NM_020121	UGGT2	13	94963225	95916655	1	13q32.1	953431	9	Amplification	2.82166
13	95541094	96289814	NM_153456	HS6ST3	13	94963225	95916655	0.501605	13q32.1	953431	9	Amplification	2.82166
13	100054091	100125105	NM_001079669	TMTC4	13	100111498	100131413	0.191621	13q32.3	19916	9	Amplification	2.82053
13	100054091	100125105	NM_032813	TMTC4	13	100111498	100131413	0.191621	13q32.3	19916	9	Amplification	2.82053
9	831690	959091	NM_021951	DMRT1	9	865836	1602384	0.731982	9p24.3	736549	9	Amplification	2.7923
9	966964	981733	NM_021240	DMRT3	9	865836	1602384	1	9p24.3	736549	9	Amplification	2.7923
9	1040346	1047555	NM_006557	DMRT2	9	865836	1602384	1	9p24.3	736549	9	Amplification	2.7923
9	1040354	1047555	NM_001130865	DMRT2	9	865836	1602384	1	9p24.3	736549	9	Amplification	2.7923
9	1040620	1047555	NM_181872	DMRT2	9	865836	1602384	1	9p24.3	736549	9	Amplification	2.7923
9	2005342	2183624	NM_003070	SMARCA2	9	1602384	3888205	1	9p24.3 - 9p24.2	2285822	9	Amplification	2.73663
9	2005342	2183624	NM_139045	SMARCA2	9	1602384	3888205	1	9p24.3 - 9p24.2	2285822	9	Amplification	2.73663
9	2525655	2612374	NR_015375	FLJ35024	9	1602384	3888205	1	9p24.3 - 9p24.2	2285822	9	Amplification	2.73663
9	2611793	2644486	NM_001018056	VLDLR	9	1602384	3888205	1	9p24.3 - 9p24.2	2285822	9	Amplification	2.73663
9	2611793	2644486	NM_003383	VLDLR	9	1602384	3888205	1	9p24.3 - 9p24.2	2285822	9	Amplification	2.73663
9	2707526	2719758	NM_133497	KCNV2	9	1602384	3888205	1	9p24.3 - 9p24.2	2285822	9	Amplification	2.73663
9	2794155	2834131	NM_014878	KIAA0020	9	1602384	3888205	1	9p24.3 - 9p24.2	2285822	9	Amplification	2.73663
9	3214647	3515984	NM_134428	RFX3	9	1602384	3888205	1	9p24.3 - 9p24.2	2285822	9	Amplification	2.73663
9	3237037	3515984	NM_002919	RFX3	9	1602384	3888205	1	9p24.3 - 9p24.2	2285822	9	Amplification	2.73663
9	3814128	4290036	NM_001042413	GLIS3	9	1602384	3888205	0.155656	9p24.3 - 9p24.2	2285822	9	Amplification	2.73663
9	3814128	4290036	NM_001042413	GLIS3	9	4028642	4432172	0.549254	9p24.2	403531	9	Amplification	2.75449
9	3814128	4142184	NM_152629	GLIS3	9	1602384	3888205	0.225808	9p24.3 - 9p24.2	2285822	9	Amplification	2.73663
9	3814128	4142184	NM_152629	GLIS3	9	4028642	4432172	0.346108	9p24.2	403531	9	Amplification	2.75449
9	6710863	7067265	NM_001146696	KDM4C	9	6804780	7265345	0.736486	9p24.1	460566	9	Amplification	2.72702
9	6747641	7160921	NM_001146694	KDM4C	9	6804780	7265345	0.861743	9p24.1	460566	9	Amplification	2.72702
9	6747641	7067265	NM_001146695	KDM4C	9	6804780	7265345	0.821231	9p24.1	460566	9	Amplification	2.72702
9	6747641	7165649	NM_015061	KDM4C	9	6804780	7265345	0.863307	9p24.1	460566	9	Amplification	2.72702
9	13095703	13240366	NM_003829	MPDZ	9	12832987	13998085	1	9p23	1165099	9	Amplification	2.73038
9	13396379	13421329	NR_033863	FLJ41200	9	12832987	13998085	1	9p23	1165099	9	Amplification	2.73038
9	14071842	14304046	NM_001190737	NFIB	9	14251369	15154149	0.22686	9p22.3	902781	9	Amplification	2.74157
9	14071842	14388983	NM_001190738	NFIB	9	14251369	15154149	0.433922	9p22.3	902781	9	Amplification	2.74157
9	14071842	14304046	NM_005596	NFIB	9	14251369	15154149	0.22686	9p22.3	902781	9	Amplification	2.74157
9	14601069	14683481	NM_178566	ZDHHC21	9	14251369	15154149	1	9p22.3	902781	9	Amplification	2.74157
9	14709732	14712716	NM_005454	CER1	9	14251369	15154149	1	9p22.3	902781	9	Amplification	2.74157
9	14724664	14769532	NM_001177704	FREM1	9	14251369	15154149	1	9p22.3	902781	9	Amplification	2.74157
9	14724664	14900994	NM_144966	FREM1	9	14251369	15154149	1	9p22.3	902781	9	Amplification	2.74157
9	14983325	15009723	NR_003920	LOC389705	9	14251369	15154149	1	9p22.3	902781	9	Amplification	2.74157
9	15160842	15297359	NM_001168339	TTC39B	9	15154149	16000773	1	9p22.3	846625	9	Amplification	2.78996
9	15160842	15297359	NM_001168340	TTC39B	9	15154149	16000773	1	9p22.3	846625	9	Amplification	2.78996
9	15160842	15297359	NM_001168341	TTC39B	9	15154149	16000773	1	9p22.3	846625	9	Amplification	2.78996
9	15160842	15240199	NM_001168342	TTC39B	9	15154149	16000773	1	9p22.3	846625	9	Amplification	2.78996
9	15160842	15297359	NM_152574	TTC39B	9	15154149	16000773	1	9p22.3	846625	9	Amplification	2.78996
9	15412782	15451628	NM_001039697	SNAPC3	9	15154149	16000773	1	9p22.3	846625	9	Amplification	2.78996
9	15454065	15501004	NM_001128217	PSIP1	9	15154149	16000773	1	9p22.3	846625	9	Amplification	2.78996
9	15454065	15501004	NM_033222	PSIP1	9	15154149	16000773	1	9p22.3	846625	9	Amplification	2.78996
9	15460642	15500288	NM_021144	PSIP1	9	15154149	16000773	1	9p22.3	846625	9	Amplification	2.78996
9	15543097	15961898	NM_173550	C9orf93	9	15154149	16000773	1	9p22.3	846625	9	Amplification	2.78996
9	17568953	17787123	NM_003026	SH3GL2	9	17568982	18771929	0.999867	9p22.2 - 9p22.1	1202948	9	Amplification	2.73459
9	18464104	18900948	NM_001040272	ADAMTSL1	9	17568982	18771929	0.704657	9p22.2 - 9p22.1	1202948	9	Amplification	2.73459
9	18464104	18674953	NM_052866	ADAMTSL1	9	17568982	18771929	1	9p22.2 - 9p22.1	1202948	9	Amplification	2.73459
9	18563304	18563378	NR_036107	MIR3152	9	17568982	18771929	1	9p22.2 - 9p22.1	1202948	9	Amplification	2.73459
9	18917891	19023257	NM_153707	FAM154A	9	18901830	19011407	0.887536	9p22.1	109578	9	Amplification	2.75403
9	27274654	27287138	NM_001161585	C9orf11	9	27273098	27278504	0.30845	9p21.2	5407	9	Amplification	2.76133
9	27274654	27287138	NM_020641	C9orf11	9	27273098	27278504	0.30845	9p21.2	5407	9	Amplification	2.76133
8	62363079	62576759	NM_173519	CLVS1	8	62105529	67670628	1	8q12.2 - 8q13.1	5565100	9	Amplification	3.11562
8	62575669	62764963	NM_001164750	ASPH	8	62105529	67670628	1	8q12.2 - 8q13.1	5565100	9	Amplification	3.11562
8	62575669	62789754	NM_004318	ASPH	8	62105529	67670628	1	8q12.2 - 8q13.1	5565100	9	Amplification	3.11562
8	62698823	62764963	NM_001164751	ASPH	8	62105529	67670628	1	8q12.2 - 8q13.1	5565100	9	Amplification	3.11562
8	62698823	62764963	NM_001164752	ASPH	8	62105529	67670628	1	8q12.2 - 8q13.1	5565100	9	Amplification	3.11562
8	62698823	62764963	NM_001164753	ASPH	8	62105529	67670628	1	8q12.2 - 8q13.1	5565100	9	Amplification	3.11562
8	62698823	62789754	NM_001164754	ASPH	8	62105529	67670628	1	8q12.2 - 8q13.1	5565100	9	Amplification	3.11562
8	62698823	62789754	NM_001164755	ASPH	8	62105529	67670628	1	8q12.2 - 8q13.1	5565100	9	Amplification	3.11562
8	62698823	62789754	NM_032466	ASPH	8	62105529	67670628	1	8q12.2 - 8q13.1	5565100	9	Amplification	3.11562
8	62698823	62764963	NM_032468	ASPH	8	62105529	67670628	1	8q12.2 - 8q13.1	5565100	9	Amplification	3.11562
8	62737931	62764963	NM_020164	ASPH	8	62105529	67670628	1	8q12.2 - 8q13.1	5565100	9	Amplification	3.11562
8	62737931	62764963	NM_032467	ASPH	8	62105529	67670628	1	8q12.2 - 8q13.1	5565100	9	Amplification	3.11562
8	62750373	62789754	NM_001164756	ASPH	8	62105529	67670628	1	8q12.2 - 8q13.1	5565100	9	Amplification	3.11562
8	63324055	64066183	NM_173688	NKAIN3	8	62105529	67670628	1	8q12.2 - 8q13.1	5565100	9	Amplification	3.11562
8	64052974	64060015	NR_027378	LOC643763	8	62105529	67670628	1	8q12.2 - 8q13.1	5565100	9	Amplification	3.11562
8	64090193	64114165	NM_003878	GGH	8	62105529	67670628	1	8q12.2 - 8q13.1	5565100	9	Amplification	3.11562
8	64134602	64161167	NM_000370	TTPA	8	62105529	67670628	1	8q12.2 - 8q13.1	5565100	9	Amplification	3.11562
8	64243675	64287901	NM_152758	YTHDF3	8	62105529	67670628	1	8q12.2 - 8q13.1	5565100	9	Amplification	3.11562
8	65448329	65453941	NR_034102	LOC100130155	8	62105529	67670628	1	8q12.2 - 8q13.1	5565100	9	Amplification	3.11562
8	65452438	65453941	NR_034103	LOC100130155	8	62105529	67670628	1	8q12.2 - 8q13.1	5565100	9	Amplification	3.11562
8	65454260	65454369	NR_029669	MIR124-2	8	62105529	67670628	1	8q12.2 - 8q13.1	5565100	9	Amplification	3.11562
8	65649420	65652375	NR_015374	LOC401463	8	62105529	67670628	1	8q12.2 - 8q13.1	5565100	9	Amplification	3.11562
8	65655368	65658741	NM_152414	BHLHE22	8	62105529	67670628	1	8q12.2 - 8q13.1	5565100	9	Amplification	3.11562
8	65671083	65873903	NM_004820	CYP7B1	8	62105529	67670628	1	8q12.2 - 8q13.1	5565100	9	Amplification	3.11562
8	66601797	66637456	NR_033893	LOC286186	8	62105529	67670628	1	8q12.2 - 8q13.1	5565100	9	Amplification	3.11562
8	66677245	66709007	NM_018120	ARMC1	8	62105529	67670628	1	8q12.2 - 8q13.1	5565100	9	Amplification	3.11562
8	66719442	66783128	NM_001145839	MTFR1	8	62105529	67670628	1	8q12.2 - 8q13.1	5565100	9	Amplification	3.11562
8	66719442	66785353	NM_014637	MTFR1	8	62105529	67670628	1	8q12.2 - 8q13.1	5565100	9	Amplification	3.11562
8	66744662	66785353	NM_001145838	MTFR1	8	62105529	67670628	1	8q12.2 - 8q13.1	5565100	9	Amplification	3.11562
8	66792459	66863876	NM_002603	PDE7A	8	62105529	67670628	1	8q12.2 - 8q13.1	5565100	9	Amplification	3.11562
8	66796606	66916310	NM_002604	PDE7A	8	62105529	67670628	1	8q12.2 - 8q13.1	5565100	9	Amplification	3.11562
8	67096345	67175310	NM_033105	DNAJC5B	8	62105529	67670628	1	8q12.2 - 8q13.1	5565100	9	Amplification	3.11562
8	67201832	67250273	NM_033058	TRIM55	8	62105529	67670628	1	8q12.2 - 8q13.1	5565100	9	Amplification	3.11562
8	67201832	67250273	NM_184085	TRIM55	8	62105529	67670628	1	8q12.2 - 8q13.1	5565100	9	Amplification	3.11562
8	67201832	67250273	NM_184086	TRIM55	8	62105529	67670628	1	8q12.2 - 8q13.1	5565100	9	Amplification	3.11562
8	67201832	67250273	NM_184087	TRIM55	8	62105529	67670628	1	8q12.2 - 8q13.1	5565100	9	Amplification	3.11562
8	67251166	67253401	NM_000756	CRH	8	62105529	67670628	1	8q12.2 - 8q13.1	5565100	9	Amplification	3.11562
8	67503817	67505523	NM_015169	RRS1	8	62105529	67670628	1	8q12.2 - 8q13.1	5565100	9	Amplification	3.11562
8	67507272	67543599	NM_144650	ADHFE1	8	62105529	67670628	1	8q12.2 - 8q13.1	5565100	9	Amplification	3.11562
8	67568045	67593314	NM_152765	C8orf46	8	62105529	67670628	1	8q12.2 - 8q13.1	5565100	9	Amplification	3.11562
8	67636964	67688035	NM_001080416	MYBL1	8	62105529	67670628	0.659167	8q12.2 - 8q13.1	5565100	9	Amplification	3.11562
8	67636964	67688035	NM_001144755	MYBL1	8	62105529	67670628	0.659167	8q12.2 - 8q13.1	5565100	9	Amplification	3.11562
8	79740837	79794553	NM_016010	FAM164A	8	79735389	80716047	1	8q21.12 - 8q21.13	980659	9	Amplification	3.10406
8	79807562	79880314	NM_000880	IL7	8	79735389	80716047	1	8q21.12 - 8q21.13	980659	9	Amplification	3.10406
8	79807562	79880314	NM_001199886	IL7	8	79735389	80716047	1	8q21.12 - 8q21.13	980659	9	Amplification	3.10406
8	79807562	79880314	NM_001199887	IL7	8	79735389	80716047	1	8q21.12 - 8q21.13	980659	9	Amplification	3.10406
8	79807562	79880314	NM_001199888	IL7	8	79735389	80716047	1	8q21.12 - 8q21.13	980659	9	Amplification	3.10406
8	80685604	80740966	NM_001199214	STMN2	8	79735389	80716047	0.549898	8q21.12 - 8q21.13	980659	9	Amplification	3.10406
8	80685604	80740966	NM_001199214	STMN2	8	80716047	81303399	0.45012	8q21.13	587353	9	Amplification	2.94389
8	80685604	80740966	NM_007029	STMN2	8	79735389	80716047	0.549898	8q21.12 - 8q21.13	980659	9	Amplification	3.10406
8	80685604	80740966	NM_007029	STMN2	8	80716047	81303399	0.45012	8q21.13	587353	9	Amplification	2.94389
8	80838800	80842654	NM_001040708	HEY1	8	80716047	81303399	1	8q21.13	587353	9	Amplification	2.94389
8	80838800	80842654	NM_012258	HEY1	8	80716047	81303399	1	8q21.13	587353	9	Amplification	2.94389
8	80993650	81105062	NM_014018	MRPS28	8	80716047	81303399	1	8q21.13	587353	9	Amplification	2.94389
8	81109660	81155566	NM_001025252	TPD52	8	80716047	81303399	1	8q21.13	587353	9	Amplification	2.94389
8	81109660	81246392	NM_001025253	TPD52	8	80716047	81303399	1	8q21.13	587353	9	Amplification	2.94389
8	81109660	81246392	NM_005079	TPD52	8	80716047	81303399	1	8q21.13	587353	9	Amplification	2.94389
8	82355340	82359564	NM_001444	FABP5	8	82285679	82420467	1	8q21.13	134789	9	Amplification	2.96323
8	82515119	82522275	NM_002677	PMP2	8	82420467	84085921	1	8q21.13	1665455	9	Amplification	3.11337
8	82533173	82536314	NM_001080526	FABP9	8	82420467	84085921	1	8q21.13	1665455	9	Amplification	3.11337
8	82553287	82558029	NM_001442	FABP4	8	82420467	84085921	1	8q21.13	1665455	9	Amplification	3.11337
8	82599836	82606106	NM_001105281	FABP12	8	82420467	84085921	1	8q21.13	1665455	9	Amplification	3.11337
8	82731706	82761145	NM_001144878	IMPA1	8	82420467	84085921	1	8q21.13	1665455	9	Amplification	3.11337
8	82731706	82761145	NM_001144879	IMPA1	8	82420467	84085921	1	8q21.13	1665455	9	Amplification	3.11337
8	82731706	82761145	NM_005536	IMPA1	8	82420467	84085921	1	8q21.13	1665455	9	Amplification	3.11337
8	82768446	82769763	NM_001010893	SLC10A5	8	82420467	84085921	1	8q21.13	1665455	9	Amplification	3.11337
8	82776121	82796095	NM_001170796	ZFAND1	8	82420467	84085921	1	8q21.13	1665455	9	Amplification	3.11337
8	82776121	82796095	NM_024699	ZFAND1	8	82420467	84085921	1	8q21.13	1665455	9	Amplification	3.11337
8	82776121	82796095	NR_033193	ZFAND1	8	82420467	84085921	1	8q21.13	1665455	9	Amplification	3.11337
8	82776121	82796095	NR_033194	ZFAND1	8	82420467	84085921	1	8q21.13	1665455	9	Amplification	3.11337
8	82776121	82796095	NR_033195	ZFAND1	8	82420467	84085921	1	8q21.13	1665455	9	Amplification	3.11337
8	82777704	82796095	NM_001170797	ZFAND1	8	82420467	84085921	1	8q21.13	1665455	9	Amplification	3.11337
8	82777704	82796095	NR_033196	ZFAND1	8	82420467	84085921	1	8q21.13	1665455	9	Amplification	3.11337
8	82807243	82834304	NM_152284	CHMP4C	8	82420467	84085921	1	8q21.13	1665455	9	Amplification	3.11337
8	82874373	82917077	NM_022133	SNX16	8	82420467	84085921	1	8q21.13	1665455	9	Amplification	3.11337
8	82874373	82917077	NM_152836	SNX16	8	82420467	84085921	1	8q21.13	1665455	9	Amplification	3.11337
8	82874373	82917077	NM_152837	SNX16	8	82420467	84085921	1	8q21.13	1665455	9	Amplification	3.11337
8	87129807	87150968	NM_033126	PSKH2	8	86936804	90695180	1	8q21.2 - 8q21.3	3758377	9	Amplification	3.07834
8	87180255	87235571	NM_152565	ATP6V0D2	8	86936804	90695180	1	8q21.2 - 8q21.3	3758377	9	Amplification	3.07834
8	87295404	87311721	NM_138817	SLC7A13	8	86936804	90695180	1	8q21.2 - 8q21.3	3758377	9	Amplification	3.07834
8	87424110	87549295	NM_007013	WWP1	8	86936804	90695180	1	8q21.2 - 8q21.3	3758377	9	Amplification	3.07834
8	87553694	87590126	NM_016033	FAM82B	8	86936804	90695180	1	8q21.2 - 8q21.3	3758377	9	Amplification	3.07834
8	87595772	87642843	NM_003909	CPNE3	8	86936804	90695180	1	8q21.2 - 8q21.3	3758377	9	Amplification	3.07834
8	87655279	87825020	NM_019098	CNGB3	8	86936804	90695180	1	8q21.2 - 8q21.3	3758377	9	Amplification	3.07834
8	87947792	88464072	NM_173538	CNBD1	8	86936804	90695180	1	8q21.2 - 8q21.3	3758377	9	Amplification	3.07834
8	88952087	88955413	NM_152418	DCAF4L2	8	86936804	90695180	1	8q21.2 - 8q21.3	3758377	9	Amplification	3.07834
8	89118576	89408834	NM_005941	MMP16	8	86936804	90695180	1	8q21.2 - 8q21.3	3758377	9	Amplification	3.07834
8	94998259	95007473	NM_018444	PDP1	8	94955505	95601140	1	8q22.1	645636	9	Amplification	2.90404
8	94998338	95007473	NM_001161780	PDP1	8	94955505	95601140	1	8q22.1	645636	9	Amplification	2.90404
8	94998351	95007473	NM_001161779	PDP1	8	94955505	95601140	1	8q22.1	645636	9	Amplification	2.90404
8	94998455	95007473	NM_001161781	PDP1	8	94955505	95601140	1	8q22.1	645636	9	Amplification	2.90404
8	94999168	95007473	NM_001161778	PDP1	8	94955505	95601140	1	8q22.1	645636	9	Amplification	2.90404
8	95208570	95298708	NM_001144663	CDH17	8	94955505	95601140	1	8q22.1	645636	9	Amplification	2.90404
8	95208570	95289992	NM_004063	CDH17	8	94955505	95601140	1	8q22.1	645636	9	Amplification	2.90404
8	95330661	95343724	NM_005261	GEM	8	94955505	95601140	1	8q22.1	645636	9	Amplification	2.90404
8	95330661	95343724	NM_181702	GEM	8	94955505	95601140	1	8q22.1	645636	9	Amplification	2.90404
8	95453364	95556487	NM_012415	RAD54B	8	94955505	95601140	1	8q22.1	645636	9	Amplification	2.90404
8	95569776	95634865	NM_015496	KIAA1429	8	94955505	95601140	0.481871	8q22.1	645636	9	Amplification	2.90404
8	95592382	95634865	NM_183009	KIAA1429	8	94955505	95601140	0.206172	8q22.1	645636	9	Amplification	2.90404
8	123863082	124055937	NM_014943	ZHX2	8	123848381	124012768	0.776159	8q24.13	164388	9	Amplification	2.80325
8	133948387	134216326	NM_003235	TG	8	134095870	134652085	0.449567	8q24.22	556216	9	Amplification	2.76851
8	134118155	134184493	NM_001045556	SLA	8	134095870	134652085	1	8q24.22	556216	9	Amplification	2.76851
8	134118155	134184493	NM_001045557	SLA	8	134095870	134652085	1	8q24.22	556216	9	Amplification	2.76851
8	134118155	134141786	NM_006748	SLA	8	134095870	134652085	1	8q24.22	556216	9	Amplification	2.76851
8	134272494	134310754	NM_003882	WISP1	8	134095870	134652085	1	8q24.22	556216	9	Amplification	2.76851
8	134272494	134309236	NM_080838	WISP1	8	134095870	134652085	1	8q24.22	556216	9	Amplification	2.76851
8	134318596	134378730	NM_001135242	NDRG1	8	134095870	134652085	1	8q24.22	556216	9	Amplification	2.76851
8	134318596	134378730	NM_006096	NDRG1	8	134095870	134652085	1	8q24.22	556216	9	Amplification	2.76851
8	134536273	134653366	NM_003033	ST3GAL1	8	134095870	134652085	0.98906	8q24.22	556216	9	Amplification	2.76851
8	134536273	134653366	NM_173344	ST3GAL1	8	134095870	134652085	0.98906	8q24.22	556216	9	Amplification	2.76851
8	140693986	140784482	NM_016601	KCNK9	8	140708061	146263891	0.84447	8q24.3	5555831	9	Amplification	2.73293
8	140811768	141537044	NM_001160372	TRAPPC9	8	140708061	146263891	1	8q24.3	5555831	9	Amplification	2.73293
8	140811768	141537861	NM_031466	TRAPPC9	8	140708061	146263891	1	8q24.3	5555831	9	Amplification	2.73293
8	141590583	141596435	NM_017444	CHRAC1	8	140708061	146263891	1	8q24.3	5555831	9	Amplification	2.73293
8	141590597	141596435	NR_023360	CHRAC1	8	140708061	146263891	1	8q24.3	5555831	9	Amplification	2.73293
8	141610446	141714829	NM_001164623	EIF2C2	8	140708061	146263891	1	8q24.3	5555831	9	Amplification	2.73293
8	141610446	141714829	NM_012154	EIF2C2	8	140708061	146263891	1	8q24.3	5555831	9	Amplification	2.73293
8	141737663	142080595	NM_001199649	PTK2	8	140708061	146263891	1	8q24.3	5555831	9	Amplification	2.73293
8	141737663	142080595	NM_005607	PTK2	8	140708061	146263891	1	8q24.3	5555831	9	Amplification	2.73293
8	141737663	142080595	NM_153831	PTK2	8	140708061	146263891	1	8q24.3	5555831	9	Amplification	2.73293
8	142207902	142275083	NM_014957	DENND3	8	140708061	146263891	1	8q24.3	5555831	9	Amplification	2.73293
8	142290052	142307856	NM_001080431	SLC45A4	8	140708061	146263891	1	8q24.3	5555831	9	Amplification	2.73293
8	142419830	142423903	NR_024441	LOC731779	8	140708061	146263891	1	8q24.3	5555831	9	Amplification	2.73293
8	142435769	142446548	NM_005293	GPR20	8	140708061	146263891	1	8q24.3	5555831	9	Amplification	2.73293
8	142501189	142510803	NM_007079	PTP4A3	8	140708061	146263891	1	8q24.3	5555831	9	Amplification	2.73293
8	142501189	142510803	NM_032611	PTP4A3	8	140708061	146263891	1	8q24.3	5555831	9	Amplification	2.73293
8	142513111	142586513	NM_207414	FLJ43860	8	140708061	146263891	1	8q24.3	5555831	9	Amplification	2.73293
8	143277624	143288272	NR_024378	NCRNA00051	8	140708061	146263891	1	8q24.3	5555831	9	Amplification	2.73293
8	143291348	143482449	NM_145003	TSNARE1	8	140708061	146263891	1	8q24.3	5555831	9	Amplification	2.73293
8	143542379	143623371	NM_001702	BAI1	8	140708061	146263891	1	8q24.3	5555831	9	Amplification	2.73293
8	143689412	143692836	NM_015193	ARC	8	140708061	146263891	1	8q24.3	5555831	9	Amplification	2.73293
8	143735876	143748404	NM_001077527	JRK	8	140708061	146263891	1	8q24.3	5555831	9	Amplification	2.73293
8	143735876	143748404	NM_003724	JRK	8	140708061	146263891	1	8q24.3	5555831	9	Amplification	2.73293
8	143748728	143761148	NR_033343	PSCA	8	140708061	146263891	1	8q24.3	5555831	9	Amplification	2.73293
8	143758876	143761148	NM_005672	PSCA	8	140708061	146263891	1	8q24.3	5555831	9	Amplification	2.73293
8	143778531	143782587	NM_001160354	LY6K	8	140708061	146263891	1	8q24.3	5555831	9	Amplification	2.73293
8	143778531	143782587	NM_001160355	LY6K	8	140708061	146263891	1	8q24.3	5555831	9	Amplification	2.73293
8	143778531	143782587	NM_017527	LY6K	8	140708061	146263891	1	8q24.3	5555831	9	Amplification	2.73293
8	143805623	143815353	NM_016647	C8orf55	8	140708061	146263891	1	8q24.3	5555831	9	Amplification	2.73293
8	143819364	143820832	NM_020427	SLURP1	8	140708061	146263891	1	8q24.3	5555831	9	Amplification	2.73293
8	143828630	143830955	NM_205545	LYPD2	8	140708061	146263891	1	8q24.3	5555831	9	Amplification	2.73293
8	143842758	143856642	NM_023946	LYNX1	8	140708061	146263891	1	8q24.3	5555831	9	Amplification	2.73293
8	143842758	143848249	NM_177458	LYNX1	8	140708061	146263891	1	8q24.3	5555831	9	Amplification	2.73293
8	143849617	143856643	NM_177457	LYNX1	8	140708061	146263891	1	8q24.3	5555831	9	Amplification	2.73293
8	143849617	143855440	NM_177476	LYNX1	8	140708061	146263891	1	8q24.3	5555831	9	Amplification	2.73293
8	143849617	143855747	NM_177477	LYNX1	8	140708061	146263891	1	8q24.3	5555831	9	Amplification	2.73293
8	143863300	143865011	NM_003695	LY6D	8	140708061	146263891	1	8q24.3	5555831	9	Amplification	2.73293
8	143913219	143925265	NM_002066	GML	8	140708061	146263891	1	8q24.3	5555831	9	Amplification	2.73293
8	143950775	143958239	NM_000497	CYP11B1	8	140708061	146263891	1	8q24.3	5555831	9	Amplification	2.73293
8	143950775	143958239	NM_001026213	CYP11B1	8	140708061	146263891	1	8q24.3	5555831	9	Amplification	2.73293
8	143988977	143996262	NM_000498	CYP11B2	8	140708061	146263891	1	8q24.3	5555831	9	Amplification	2.73293
8	144134823	144171183	NR_026913	LOC100133669	8	140708061	146263891	1	8q24.3	5555831	9	Amplification	2.73293
8	144171277	144175203	NM_001127213	LY6E	8	140708061	146263891	1	8q24.3	5555831	9	Amplification	2.73293
8	144171277	144175203	NM_002346	LY6E	8	140708061	146263891	1	8q24.3	5555831	9	Amplification	2.73293
8	144192054	144207096	NM_173687	C8orf31	8	140708061	146263891	1	8q24.3	5555831	9	Amplification	2.73293
8	144310706	144313429	NM_001130478	LY6H	8	140708061	146263891	1	8q24.3	5555831	9	Amplification	2.73293
8	144310706	144313131	NM_001135655	LY6H	8	140708061	146263891	1	8q24.3	5555831	9	Amplification	2.73293
8	144310706	144312833	NM_002347	LY6H	8	140708061	146263891	1	8q24.3	5555831	9	Amplification	2.73293
8	144366443	144370420	NM_178172	GPIHBP1	8	140708061	146263891	1	8q24.3	5555831	9	Amplification	2.73293
8	144400484	144416251	NM_173832	ZFP41	8	140708061	146263891	1	8q24.3	5555831	9	Amplification	2.73293
8	144420982	144430477	NM_138465	GLI4	8	140708061	146263891	1	8q24.3	5555831	9	Amplification	2.73293
8	144444934	144453496	NM_030895	ZNF696	8	140708061	146263891	1	8q24.3	5555831	9	Amplification	2.73293
8	144462903	144488426	NM_052963	TOP1MT	8	140708061	146263891	1	8q24.3	5555831	9	Amplification	2.73293
8	144520168	144522181	NR_026785	C8orf51	8	140708061	146263891	1	8q24.3	5555831	9	Amplification	2.73293
8	144522400	144537534	NM_052924	RHPN1	8	140708061	146263891	1	8q24.3	5555831	9	Amplification	2.73293
8	144581373	144583746	NM_201589	MAFA	8	140708061	146263891	1	8q24.3	5555831	9	Amplification	2.73293
8	144590968	144694764	NM_015117	ZC3H3	8	140708061	146263891	1	8q24.3	5555831	9	Amplification	2.73293
8	144706700	144716375	NM_001166237	GSDMD	8	140708061	146263891	1	8q24.3	5555831	9	Amplification	2.73293
8	144711620	144716375	NM_024736	GSDMD	8	140708061	146263891	1	8q24.3	5555831	9	Amplification	2.73293
8	144719506	144726072	NM_001100878	C8orf73	8	140708061	146263891	1	8q24.3	5555831	9	Amplification	2.73293
8	144728098	144731657	NM_145201	NAPRT1	8	140708061	146263891	1	8q24.3	5555831	9	Amplification	2.73293
8	144733010	144750989	NM_001130053	EEF1D	8	140708061	146263891	1	8q24.3	5555831	9	Amplification	2.73293
8	144733010	144750989	NM_001130055	EEF1D	8	140708061	146263891	1	8q24.3	5555831	9	Amplification	2.73293
8	144733010	144750989	NM_001130056	EEF1D	8	140708061	146263891	1	8q24.3	5555831	9	Amplification	2.73293
8	144733010	144750702	NM_001130057	EEF1D	8	140708061	146263891	1	8q24.3	5555831	9	Amplification	2.73293
8	144733010	144750989	NM_001195203	EEF1D	8	140708061	146263891	1	8q24.3	5555831	9	Amplification	2.73293
8	144733010	144750989	NM_001960	EEF1D	8	140708061	146263891	1	8q24.3	5555831	9	Amplification	2.73293
8	144733010	144750989	NM_032378	EEF1D	8	140708061	146263891	1	8q24.3	5555831	9	Amplification	2.73293
8	144751217	144753629	NM_032862	TIGD5	8	140708061	146263891	1	8q24.3	5555831	9	Amplification	2.73293
8	144757226	144762928	NM_023078	PYCRL	8	140708061	146263891	1	8q24.3	5555831	9	Amplification	2.73293
8	144765931	144770876	NM_003313	TSTA3	8	140708061	146263891	1	8q24.3	5555831	9	Amplification	2.73293
8	144789516	144807044	NM_001082480	ZNF623	8	140708061	146263891	1	8q24.3	5555831	9	Amplification	2.73293
8	144803097	144807044	NM_014789	ZNF623	8	140708061	146263891	1	8q24.3	5555831	9	Amplification	2.73293
8	144838610	144849544	NM_001100598	ZNF707	8	140708061	146263891	1	8q24.3	5555831	9	Amplification	2.73293
8	144838610	144849544	NM_001100599	ZNF707	8	140708061	146263891	1	8q24.3	5555831	9	Amplification	2.73293
8	144838610	144849544	NM_173831	ZNF707	8	140708061	146263891	1	8q24.3	5555831	9	Amplification	2.73293
8	144851273	144852572	NR_015445	BREA2	8	140708061	146263891	1	8q24.3	5555831	9	Amplification	2.73293
8	144860852	144862268	NM_001162914	LOC100130274	8	140708061	146263891	1	8q24.3	5555831	9	Amplification	2.73293
8	144870495	144876622	NM_139021	MAPK15	8	140708061	146263891	1	8q24.3	5555831	9	Amplification	2.73293
8	144878091	144887903	NM_198488	FAM83H	8	140708061	146263891	1	8q24.3	5555831	9	Amplification	2.73293
8	144888298	144900496	NR_033849	LOC100128338	8	140708061	146263891	1	8q24.3	5555831	9	Amplification	2.73293
8	144945078	144969538	NM_015356	SCRIB	8	140708061	146263891	1	8q24.3	5555831	9	Amplification	2.73293
8	144945078	144969538	NM_182706	SCRIB	8	140708061	146263891	1	8q24.3	5555831	9	Amplification	2.73293
8	144967115	144967201	NR_030633	MIR937	8	140708061	146263891	1	8q24.3	5555831	9	Amplification	2.73293
8	144970535	144983526	NM_014281	PUF60	8	140708061	146263891	1	8q24.3	5555831	9	Amplification	2.73293
8	144970535	144983526	NM_078480	PUF60	8	140708061	146263891	1	8q24.3	5555831	9	Amplification	2.73293
8	144970541	144983185	NM_001136033	PUF60	8	140708061	146263891	1	8q24.3	5555831	9	Amplification	2.73293
8	144987743	144995135	NM_178564	NRBP2	8	140708061	146263891	1	8q24.3	5555831	9	Amplification	2.73293
8	145011900	145019423	NM_031308	EPPK1	8	140708061	146263891	1	8q24.3	5555831	9	Amplification	2.73293
8	145061309	145122902	NM_000445	PLEC	8	140708061	146263891	1	8q24.3	5555831	9	Amplification	2.73293
8	145061309	145119686	NM_201378	PLEC	8	140708061	146263891	1	8q24.3	5555831	9	Amplification	2.73293
8	145061309	145100077	NM_201379	PLEC	8	140708061	146263891	1	8q24.3	5555831	9	Amplification	2.73293
8	145061309	145097033	NM_201380	PLEC	8	140708061	146263891	1	8q24.3	5555831	9	Amplification	2.73293
8	145061309	145090894	NM_201381	PLEC	8	140708061	146263891	1	8q24.3	5555831	9	Amplification	2.73293
8	145061309	145090099	NM_201382	PLEC	8	140708061	146263891	1	8q24.3	5555831	9	Amplification	2.73293
8	145061309	145088681	NM_201383	PLEC	8	140708061	146263891	1	8q24.3	5555831	9	Amplification	2.73293
8	145061309	145085747	NM_201384	PLEC	8	140708061	146263891	1	8q24.3	5555831	9	Amplification	2.73293
8	145091347	145091436	NR_030383	MIR661	8	140708061	146263891	1	8q24.3	5555831	9	Amplification	2.73293
8	145123308	145132624	NM_032789	PARP10	8	140708061	146263891	1	8q24.3	5555831	9	Amplification	2.73293
8	145136214	145139572	NM_000837	GRINA	8	140708061	146263891	1	8q24.3	5555831	9	Amplification	2.73293
8	145136214	145139572	NM_001009184	GRINA	8	140708061	146263891	1	8q24.3	5555831	9	Amplification	2.73293
8	145158570	145174004	NM_001134374	SPATC1	8	140708061	146263891	1	8q24.3	5555831	9	Amplification	2.73293
8	145158570	145174004	NM_198572	SPATC1	8	140708061	146263891	1	8q24.3	5555831	9	Amplification	2.73293
8	145178155	145187573	NM_017570	OPLAH	8	140708061	146263891	1	8q24.3	5555831	9	Amplification	2.73293
8	145205510	145207540	NM_019037	EXOSC4	8	140708061	146263891	1	8q24.3	5555831	9	Amplification	2.73293
8	145209512	145213108	NM_003801	GPAA1	8	140708061	146263891	1	8q24.3	5555831	9	Amplification	2.73293
8	145221948	145224417	NM_001916	CYC1	8	140708061	146263891	1	8q24.3	5555831	9	Amplification	2.73293
8	145225524	145231129	NM_030974	SHARPIN	8	140708061	146263891	1	8q24.3	5555831	9	Amplification	2.73293
8	145231293	145234504	NM_032272	MAF1	8	140708061	146263891	1	8q24.3	5555831	9	Amplification	2.73293
8	145234617	145245207	NR_024207	KIAA1875	8	140708061	146263891	1	8q24.3	5555831	9	Amplification	2.73293
8	145264660	145267609	NM_016458	C8orf30A	8	140708061	146263891	1	8q24.3	5555831	9	Amplification	2.73293
8	145274907	145340357	NM_001099280	HEATR7A	8	140708061	146263891	1	8q24.3	5555831	9	Amplification	2.73293
8	145274907	145340357	NM_001099281	HEATR7A	8	140708061	146263891	1	8q24.3	5555831	9	Amplification	2.73293
8	145274907	145388832	NM_032450	HEATR7A	8	140708061	146263891	1	8q24.3	5555831	9	Amplification	2.73293
8	145393505	145395034	NM_001008271	SCXA	8	140708061	146263891	1	8q24.3	5555831	9	Amplification	2.73293
8	145393505	145395034	NM_001080514	SCXB	8	140708061	146263891	1	8q24.3	5555831	9	Amplification	2.73293
8	145408688	145411637	NM_016458.1	C8orf30A	8	140708061	146263891	1	8q24.3	5555831	9	Amplification	2.73293
8	145456864	145485929	NM_015201	BOP1	8	140708061	146263891	1	8q24.3	5555831	9	Amplification	2.73293
8	145461411	145462940	NM_001008271.1	SCXA	8	140708061	146263891	1	8q24.3	5555831	9	Amplification	2.73293
8	145461411	145462940	NM_001080514.1	SCXB	8	140708061	146263891	1	8q24.3	5555831	9	Amplification	2.73293
8	145486078	145509194	NM_005526	HSF1	8	140708061	146263891	1	8q24.3	5555831	9	Amplification	2.73293
8	145509055	145521376	NM_012079	DGAT1	8	140708061	146263891	1	8q24.3	5555831	9	Amplification	2.73293
8	145525262	145530752	NM_031309.1	SCRT1	8	140708061	146263891	1	8q24.3	5555831	9	Amplification	2.73293
8	145547694	145549314	NR_015428	C8ORFK29	8	140708061	146263891	1	8q24.3	5555831	9	Amplification	2.73293
8	145549899	145552941	NM_012162	FBXL6	8	140708061	146263891	1	8q24.3	5555831	9	Amplification	2.73293
8	145549899	145552941	NM_024555	FBXL6	8	140708061	146263891	1	8q24.3	5555831	9	Amplification	2.73293
8	145553033	145555755	NM_024531	GPR172A	8	140708061	146263891	1	8q24.3	5555831	9	Amplification	2.73293
8	145568539	145589262	NM_174922	ADCK5	8	140708061	146263891	1	8q24.3	5555831	9	Amplification	2.73293
8	145589254	145605542	NM_013291	CPSF1	8	140708061	146263891	1	8q24.3	5555831	9	Amplification	2.73293
8	145590172	145590254	NR_030635	MIR939	8	140708061	146263891	1	8q24.3	5555831	9	Amplification	2.73293
8	145596284	145596368	NR_031600	MIR1234	8	140708061	146263891	1	8q24.3	5555831	9	Amplification	2.73293
8	145608606	145612726	NM_017767	SLC39A4	8	140708061	146263891	1	8q24.3	5555831	9	Amplification	2.73293
8	145608606	145613082	NM_130849	SLC39A4	8	140708061	146263891	1	8q24.3	5555831	9	Amplification	2.73293
8	145619808	145624736	NM_016208	VPS28	8	140708061	146263891	1	8q24.3	5555831	9	Amplification	2.73293
8	145619808	145624736	NM_183057	VPS28	8	140708061	146263891	1	8q24.3	5555831	9	Amplification	2.73293
8	145624971	145640621	NM_013432	TONSL	8	140708061	146263891	1	8q24.3	5555831	9	Amplification	2.73293
8	145646123	145661227	NM_138496	CYHR1	8	140708061	146263891	1	8q24.3	5555831	9	Amplification	2.73293
8	145660008	145661840	NM_001129888	CYHR1	8	140708061	146263891	1	8q24.3	5555831	9	Amplification	2.73293
8	145660008	145661658	NM_032687	CYHR1	8	140708061	146263891	1	8q24.3	5555831	9	Amplification	2.73293
8	145662546	145670308	NM_145754	KIFC2	8	140708061	146263891	1	8q24.3	5555831	9	Amplification	2.73293
8	145669923	145672527	NM_003923	FOXH1	8	140708061	146263891	1	8q24.3	5555831	9	Amplification	2.73293
8	145692917	145698313	NM_032902	PPP1R16A	8	140708061	146263891	1	8q24.3	5555831	9	Amplification	2.73293
8	145700273	145703364	NM_005309	GPT	8	140708061	146263891	1	8q24.3	5555831	9	Amplification	2.73293
8	145705360	145707398	NM_138431	MFSD3	8	140708061	146263891	1	8q24.3	5555831	9	Amplification	2.73293
8	145707475	145714019	NM_004260	RECQL4	8	140708061	146263891	1	8q24.3	5555831	9	Amplification	2.73293
8	145714171	145721368	NM_014665	LRRC14	8	140708061	146263891	1	8q24.3	5555831	9	Amplification	2.73293
8	145718569	145723225	NM_001024678	LRRC24	8	140708061	146263891	1	8q24.3	5555831	9	Amplification	2.73293
8	145722411	145725267	NM_001001795	C8orf82	8	140708061	146263891	1	8q24.3	5555831	9	Amplification	2.73293
8	145725371	145809697	NM_025251	ARHGAP39	8	140708061	146263891	1	8q24.3	5555831	9	Amplification	2.73293
8	145917103	145951776	NM_138367	ZNF251	8	140708061	146263891	1	8q24.3	5555831	9	Amplification	2.73293
8	145969305	145983530	NM_030580	ZNF34	8	140708061	146263891	1	8q24.3	5555831	9	Amplification	2.73293
8	145985958	145988610	NM_000973	RPL8	8	140708061	146263891	1	8q24.3	5555831	9	Amplification	2.73293
8	145985958	145988534	NM_033301	RPL8	8	140708061	146263891	1	8q24.3	5555831	9	Amplification	2.73293
8	145995065	146005334	NM_213605	ZNF517	8	140708061	146263891	1	8q24.3	5555831	9	Amplification	2.73293
8	146023707	146039411	NM_003416	ZNF7	8	140708061	146263891	1	8q24.3	5555831	9	Amplification	2.73293
8	146046355	146049737	NM_001081003	COMMD5	8	140708061	146263891	1	8q24.3	5555831	9	Amplification	2.73293
8	146046355	146049256	NM_001081004	COMMD5	8	140708061	146263891	1	8q24.3	5555831	9	Amplification	2.73293
8	146046355	146049257	NM_014066	COMMD5	8	140708061	146263891	1	8q24.3	5555831	9	Amplification	2.73293
8	146073140	146097651	NM_001109689	ZNF250	8	140708061	146263891	1	8q24.3	5555831	9	Amplification	2.73293
8	146073140	146097651	NM_021061	ZNF250	8	140708061	146263891	1	8q24.3	5555831	9	Amplification	2.73293
8	146126548	146147079	NM_001029976	ZNF16	8	140708061	146263891	1	8q24.3	5555831	9	Amplification	2.73293
8	146126548	146147079	NM_006958	ZNF16	8	140708061	146263891	1	8q24.3	5555831	9	Amplification	2.73293
8	146169779	146199090	NR_023392	ZNF252	8	140708061	146263891	1	8q24.3	5555831	9	Amplification	2.73293
8	146191055	146195088	NR_002807	TMED10P1	8	140708061	146263891	1	8q24.3	5555831	9	Amplification	2.73293
8	146199001	146202237	NR_026974	C8orf77	8	140708061	146263891	1	8q24.3	5555831	9	Amplification	2.73293
8	146248628	146252221	NM_023080	C8orf33	8	140708061	146263891	1	8q24.3	5555831	9	Amplification	2.73293
5	40861121	40865002	NR_037665	LOC100506548	5	39170969	41108743	1	5p13.1	1937775	9	Amplification	2.82617
5	40867187	40871145	NM_000997	RPL37	5	39170969	41108743	1	5p13.1	1937775	9	Amplification	2.82617
5	40868515	40868595	NR_002583	SNORD72	5	39170969	41108743	1	5p13.1	1937775	9	Amplification	2.82617
5	40877167	40891214	NM_032587	CARD6	5	39170969	41108743	1	5p13.1	1937775	9	Amplification	2.82617
5	40945356	41018799	NM_000587	C7	5	39170969	41108743	1	5p13.1	1937775	9	Amplification	2.82617
5	41033879	41107202	NM_173489	HEATR7B2	5	39170969	41108743	1	5p13.1	1937775	9	Amplification	2.82617
5	41178093	41249425	NM_000065	C6	5	41108743	42443196	1	5p13.1 - 5p12	1334454	9	Amplification	2.87814
5	41178093	41297298	NM_001115131	C6	5	41108743	42443196	1	5p13.1 - 5p12	1334454	9	Amplification	2.87814
5	41342805	41546488	NM_001005473	PLCXD3	5	41108743	42443196	1	5p13.1 - 5p12	1334454	9	Amplification	2.87814
5	41511491	41511562	NR_031676	MIR1274A	5	41108743	42443196	1	5p13.1 - 5p12	1334454	9	Amplification	2.87814
5	41765924	41906549	NM_000436	OXCT1	5	41108743	42443196	1	5p13.1 - 5p12	1334454	9	Amplification	2.87814
5	41940227	41957496	NM_175921	C5orf51	5	41108743	42443196	1	5p13.1 - 5p12	1334454	9	Amplification	2.87814
5	41961113	41977430	NM_012176	FBXO4	5	41108743	42443196	1	5p13.1 - 5p12	1334454	9	Amplification	2.87814
5	41961113	41970943	NM_033484	FBXO4	5	41108743	42443196	1	5p13.1 - 5p12	1334454	9	Amplification	2.87814
5	35091559	35266552	NM_000949	PRLR	5	35181051	35377072	0.4886	5p13.2	196022	10	Amplification	2.80571
5	35653746	35850471	NM_024867	SPEF2	5	35377072	35812632	0.807656	5p13.2	435561	9	Amplification	2.83913
5	35653746	35707434	NM_144722	SPEF2	5	35377072	35812632	1	5p13.2	435561	9	Amplification	2.83913
5	31229553	31360995	NM_004932	CDH6	5	30803912	31354704	0.952139	5p13.3	550793	11	Amplification	2.90983
5	31229553	31360995	NM_004932	CDH6	5	31354704	31374127	0.0478687	5p13.3	19424	10	Amplification	2.93768
5	31436359	31568040	NM_001100412	DROSHA	5	31399108	31631039	1	5p13.3	231932	10	Amplification	2.78267
5	31436359	31568040	NM_013235	DROSHA	5	31399108	31631039	1	5p13.3	231932	10	Amplification	2.78267
5	31568130	31590923	NM_018356	C5orf22	5	31399108	31631039	1	5p13.3	231932	10	Amplification	2.78267
5	31834788	32146796	NM_178140	PDZD2	5	31631039	35181051	1	5p13.3 - 5p13.2	3550013	9	Amplification	2.79802
5	31971965	31972023	NR_036241	MIR4279	5	31631039	35181051	1	5p13.3 - 5p13.2	3550013	9	Amplification	2.79802
[truncated: 61 more rows]
