# Supplementary material for: A Genome-Wide Study of Cytogenetic Changes in Colorectal Cancer Using SNP Microarrays: Opportunities for Future Personalized Treatment
Source: PLoS One. 2012 Feb 20;7(2):e31968. doi: 10.1371/journal.pone.0031968 (PMC3282791; doi:10.1371/journal.pone.0031968)
Supplement: Table S9 — List of genes found to be significantly deleted in tumor tissue in at least 10% of samples. (CSV) [file pone.0031968.s010.csv]

Table S9: List of genes found to be significantly deleted in tumor tissue in at least 10% of samples
chromosome	Transcript start	Transcript end	Transcript ID	Gene Symbol	chromosome	start	end	gene overlap percent	cytoband	length (bps)	# samples	Copy Number	average CN
18	48120540	49316272	NM_005215	DCC	18	49049124	49632184	0.223419	18q21.2	583061	18	Deletion	1.26042
18	49934573	50005157	NM_003927	MBD2	18	49713662	50357802	1	18q21.2	644141	18	Deletion	1.28302
18	49983045	50005157	NM_015832	MBD2	18	49713662	50357802	1	18q21.2	644141	18	Deletion	1.28302
18	50002652	50002781	NR_002970	SNORA37	18	49713662	50357802	1	18q21.2	644141	18	Deletion	1.28302
18	50049847	50078603	NM_007195	POLI	18	49713662	50357802	1	18q21.2	644141	18	Deletion	1.28302
18	50105060	50134942	NM_139171	STARD6	18	49713662	50357802	1	18q21.2	644141	18	Deletion	1.28302
18	50139169	50162403	NM_173529	C18orf54	18	49713662	50357802	1	18q21.2	644141	18	Deletion	1.28302
18	50409388	50417723	NM_173629	C18orf26	18	50357802	50484437	1	18q21.2	126636	18	Deletion	1.27175
18	51040560	51406859	NM_001083962	TCF4	18	50926271	51103664	0.172277	18q21.2	177394	18	Deletion	1.26971
18	51040560	51406859	NM_001083962	TCF4	18	51103664	51334398	0.629907	18q21.2	230735	18	Deletion	1.28089
18	51040560	51406859	NM_003199	TCF4	18	50926271	51103664	0.172277	18q21.2	177394	18	Deletion	1.26971
18	51040560	51406859	NM_003199	TCF4	18	51103664	51334398	0.629907	18q21.2	230735	18	Deletion	1.28089
18	53363071	53404968	NM_000140	FECH	18	53402615	53462057	0.0561841	18q21.31	59443	18	Deletion	1.28124
18	53363071	53404968	NM_001012515	FECH	18	53402615	53462057	0.0561841	18q21.31	59443	18	Deletion	1.28124
18	53418892	53440176	NM_004539	NARS	18	53402615	53462057	1	18q21.31	59443	18	Deletion	1.28124
18	53464657	53621326	NM_005603	ATP8B1	18	53462057	54338094	1	18q21.31	876038	18	Deletion	1.26579
18	53862617	54219753	NM_001144967	NEDD4L	18	53462057	54338094	1	18q21.31	876038	18	Deletion	1.26579
18	53862617	54219753	NM_015277	NEDD4L	18	53462057	54338094	1	18q21.31	876038	18	Deletion	1.26579
18	53865456	54219753	NM_001144964	NEDD4L	18	53462057	54338094	1	18q21.31	876038	18	Deletion	1.26579
18	53967563	54219753	NM_001144965	NEDD4L	18	53462057	54338094	1	18q21.31	876038	18	Deletion	1.26579
18	53967563	54219753	NM_001144968	NEDD4L	18	53462057	54338094	1	18q21.31	876038	18	Deletion	1.26579
18	53967563	54219753	NM_001144969	NEDD4L	18	53462057	54338094	1	18q21.31	876038	18	Deletion	1.26579
18	53967563	54219753	NM_001144971	NEDD4L	18	53462057	54338094	1	18q21.31	876038	18	Deletion	1.26579
18	54013635	54219753	NM_001144970	NEDD4L	18	53462057	54338094	1	18q21.31	876038	18	Deletion	1.26579
18	54039747	54219753	NM_001144966	NEDD4L	18	53462057	54338094	1	18q21.31	876038	18	Deletion	1.26579
18	54269286	54269371	NR_029667	MIR122	18	53462057	54338094	1	18q21.31	876038	18	Deletion	1.26579
18	54299462	54447170	NM_052947	ALPK2	18	53462057	54338094	0.261548	18q21.31	876038	18	Deletion	1.26579
18	54299462	54447170	NM_052947	ALPK2	18	54338094	55553340	0.738459	18q21.31 - 18q21.32	1215247	18	Deletion	1.28816
18	54489598	54568351	NM_006785	MALT1	18	54338094	55553340	1	18q21.31 - 18q21.32	1215247	18	Deletion	1.28816
18	54489598	54568351	NM_173844	MALT1	18	54338094	55553340	1	18q21.31 - 18q21.32	1215247	18	Deletion	1.28816
18	54681041	54804690	NM_018181	ZNF532	18	54338094	55553340	1	18q21.31 - 18q21.32	1215247	18	Deletion	1.28816
18	54853951	54871427	NR_024021	LOC390858	18	54338094	55553340	1	18q21.31 - 18q21.32	1215247	18	Deletion	1.28816
18	54958105	54977044	NM_033280	SEC11C	18	54338094	55553340	1	18q21.31 - 18q21.32	1215247	18	Deletion	1.28816
18	55038380	55048983	NM_001012512	GRP	18	54338094	55553340	1	18q21.31 - 18q21.32	1215247	18	Deletion	1.28816
18	55038380	55048983	NM_001012513	GRP	18	54338094	55553340	1	18q21.31 - 18q21.32	1215247	18	Deletion	1.28816
18	55038380	55048983	NM_002091	GRP	18	54338094	55553340	1	18q21.31 - 18q21.32	1215247	18	Deletion	1.28816
18	55085247	55091606	NM_013435	RAX	18	54338094	55553340	1	18q21.31 - 18q21.32	1215247	18	Deletion	1.28816
18	55113616	55136862	NM_181654	CPLX4	18	54338094	55553340	1	18q21.31 - 18q21.32	1215247	18	Deletion	1.28816
18	55146036	55177489	NM_005570	LMAN1	18	54338094	55553340	1	18q21.31 - 18q21.32	1215247	18	Deletion	1.28816
18	55249151	55515625	NM_133459	CCBE1	18	54338094	55553340	1	18q21.31 - 18q21.32	1215247	18	Deletion	1.28816
18	55718172	55722519	NM_021127	PMAIP1	18	55553340	55957043	1	18q21.32	403704	18	Deletion	1.27812
18	56189544	56190982	NM_005912	MC4R	18	56048098	56213122	1	18q21.32	165025	18	Deletion	1.30782
18	57308755	57373346	NM_031891	CDH20	18	57098837	57742903	1	18q21.32 - 18q21.33	644067	18	Deletion	1.27006
18	57633284	57711285	NM_173557	RNF152	18	57098837	57742903	1	18q21.32 - 18q21.33	644067	18	Deletion	1.27006
18	58143528	58204485	NM_003839	TNFRSF11A	18	58150622	58632522	0.883625	18q21.33	481901	18	Deletion	1.29891
18	58341638	58396799	NM_017742	ZCCHC2	18	58150622	58632522	1	18q21.33	481901	18	Deletion	1.29891
18	58533652	58798647	NM_194449	PHLPP1	18	58150622	58632522	0.373104	18q21.33	481901	18	Deletion	1.29891
18	59374373	59385225	NM_080474	SERPINB12	18	59325270	59870460	1	18q21.33 - 18q22.1	545191	18	Deletion	1.2872
18	59405514	59417414	NM_012397	SERPINB13	18	59325270	59870460	1	18q21.33 - 18q22.1	545191	18	Deletion	1.2872
18	59455473	59462483	NM_002974	SERPINB4	18	59325270	59870460	1	18q21.33 - 18q22.1	545191	18	Deletion	1.2872
18	59473411	59480178	NM_006919	SERPINB3	18	59325270	59870460	1	18q21.33 - 18q22.1	545191	18	Deletion	1.2872
18	59521174	59542103	NM_080475	SERPINB11	18	59325270	59870460	1	18q21.33 - 18q22.1	545191	18	Deletion	1.2872
18	59571257	59623584	NM_001040147	SERPINB7	18	59325270	59870460	1	18q21.33 - 18q22.1	545191	18	Deletion	1.2872
18	59593592	59623585	NM_003784	SERPINB7	18	59325270	59870460	1	18q21.33 - 18q22.1	545191	18	Deletion	1.2872
18	59705919	59722105	NM_001143818	SERPINB2	18	59325270	59870460	1	18q21.33 - 18q22.1	545191	18	Deletion	1.2872
18	59705919	59722105	NM_002575	SERPINB2	18	59325270	59870460	1	18q21.33 - 18q22.1	545191	18	Deletion	1.2872
18	59733725	59753457	NM_005024	SERPINB10	18	59325270	59870460	1	18q21.33 - 18q22.1	545191	18	Deletion	1.2872
18	59767568	59778626	NM_001123366	HMSD	18	59325270	59870460	1	18q21.33 - 18q22.1	545191	18	Deletion	1.2872
18	59788243	59804868	NM_001031848	SERPINB8	18	59325270	59870460	1	18q21.33 - 18q22.1	545191	18	Deletion	1.2872
18	59788243	59807589	NM_002640	SERPINB8	18	59325270	59870460	1	18q21.33 - 18q22.1	545191	18	Deletion	1.2872
18	59788243	59807589	NM_198833	SERPINB8	18	59325270	59870460	1	18q21.33 - 18q22.1	545191	18	Deletion	1.2872
18	61568468	61699156	NM_033646	CDH7	18	60351499	65384441	1	18q22.1 - 18q22.2	5032943	18	Deletion	1.29267
18	61569137	61699155	NM_004361	CDH7	18	60351499	65384441	1	18q22.1 - 18q22.2	5032943	18	Deletion	1.29267
18	62322301	62422197	NM_021153	CDH19	18	60351499	65384441	1	18q22.1 - 18q22.2	5032943	18	Deletion	1.29267
18	63324799	63334948	NM_032160	DSEL	18	60351499	65384441	1	18q22.1 - 18q22.2	5032943	18	Deletion	1.29267
18	63334763	63717837	NR_033921	LOC643542	18	60351499	65384441	1	18q22.1 - 18q22.2	5032943	18	Deletion	1.29267
18	64491905	64533334	NM_019022	TMX3	18	60351499	65384441	1	18q22.1 - 18q22.2	5032943	18	Deletion	1.29267
18	64533471	64873407	NM_001093729	CCDC102B	18	60351499	65384441	1	18q22.1 - 18q22.2	5032943	18	Deletion	1.29267
18	64616297	64873407	NM_024781	CCDC102B	18	60351499	65384441	1	18q22.1 - 18q22.2	5032943	18	Deletion	1.29267
18	65219264	65667303	NM_152721	DOK6	18	60351499	65384441	0.368668	18q22.1 - 18q22.2	5032943	18	Deletion	1.29267
18	75540789	75615496	NM_004715	CTDP1	18	75418654	75791848	1	18q23	373195	18	Deletion	1.28801
18	75540789	75615496	NM_048368	CTDP1	18	75418654	75791848	1	18q23	373195	18	Deletion	1.28801
18	75724656	75760805	NM_012283	KCNG2	18	75418654	75791848	1	18q23	373195	18	Deletion	1.28801
18	75763408	75812642	NM_001146343	PQLC1	18	75418654	75791848	0.577658	18q23	373195	18	Deletion	1.28801
18	75763408	75812642	NM_001146345	PQLC1	18	75418654	75791848	0.577658	18q23	373195	18	Deletion	1.28801
18	75763408	75812642	NM_025078	PQLC1	18	75418654	75791848	0.577658	18q23	373195	18	Deletion	1.28801
18	35040886	35585958	NR_024391	LOC647946	18	33969525	36275082	1	18q12.2 - 18q12.3	2305558	17	Deletion	1.29047
18	46155390	46174537	NM_001039535	SKA1	18	46139773	46534818	1	18q21.1 - 18q21.2	395046	17	Deletion	1.28091
18	46155390	46174537	NM_145060	SKA1	18	46139773	46534818	1	18q21.1 - 18q21.2	395046	17	Deletion	1.28091
18	46340482	46512195	NM_002747	MAPK4	18	46139773	46534818	1	18q21.1 - 18q21.2	395046	17	Deletion	1.28091
18	46575488	46605753	NM_001127174	MRO	18	46579416	46599212	0.6541	18q21.2	19797	17	Deletion	1.30399
18	46575488	46605753	NM_001127174	MRO	18	46599212	46708849	0.21615	18q21.2	109638	17	Deletion	1.25673
18	46575488	46600433	NM_001127175	MRO	18	46579416	46599212	0.793594	18q21.2	19797	17	Deletion	1.30399
18	46575488	46600433	NM_001127175	MRO	18	46599212	46708849	0.0489858	18q21.2	109638	17	Deletion	1.25673
18	46575488	46600433	NM_001127176	MRO	18	46579416	46599212	0.793594	18q21.2	19797	17	Deletion	1.30399
18	46575488	46600433	NM_001127176	MRO	18	46599212	46708849	0.0489858	18q21.2	109638	17	Deletion	1.25673
18	46575488	46600433	NM_031939	MRO	18	46579416	46599212	0.793594	18q21.2	19797	17	Deletion	1.30399
18	46575488	46600433	NM_031939	MRO	18	46599212	46708849	0.0489858	18q21.2	109638	17	Deletion	1.25673
18	46659430	46730161	NM_001168335	ME2	18	46599212	46708849	0.698694	18q21.2	109638	17	Deletion	1.25673
18	46659430	46730161	NM_002396	ME2	18	46599212	46708849	0.698694	18q21.2	109638	17	Deletion	1.25673
18	46954918	46978050	NM_016626	MEX3C	18	46937024	47007998	1	18q21.2	70975	17	Deletion	1.22514
18	48120540	49316272	NM_005215	DCC	18	48089511	48611660	0.410728	18q21.2	522150	17	Deletion	1.26532
18	48120540	49316272	NM_005215	DCC	18	48611660	49049124	0.365855	18q21.2	437465	17	Deletion	1.25154
18	50646838	50708210	NM_004163	RAB27B	18	50484437	50926271	1	18q21.2	441835	17	Deletion	1.26249
18	50719738	50776278	NM_001143829	CCDC68	18	50484437	50926271	1	18q21.2	441835	17	Deletion	1.26249
18	50719738	50777738	NM_025214	CCDC68	18	50484437	50926271	1	18q21.2	441835	17	Deletion	1.26249
18	51040560	51406859	NM_001083962	TCF4	18	51334398	52540394	0.197821	18q21.2 - 18q21.31	1205997	17	Deletion	1.27797
18	51040560	51406859	NM_003199	TCF4	18	51334398	52540394	0.197821	18q21.2 - 18q21.31	1205997	17	Deletion	1.27797
18	52421051	52456919	NM_004786	TXNL1	18	51334398	52540394	1	18q21.2 - 18q21.31	1205997	17	Deletion	1.27797
18	52421051	52456919	NR_024546	TXNL1	18	51334398	52540394	1	18q21.2 - 18q21.31	1205997	17	Deletion	1.27797
18	52469614	52848035	NM_015285	WDR7	18	51334398	52540394	0.187043	18q21.2 - 18q21.31	1205997	17	Deletion	1.27797
18	52469614	52848035	NM_015285	WDR7	18	52540394	53189183	0.81296	18q21.31	648790	17	Deletion	1.26703
18	52469614	52848035	NM_052834	WDR7	18	51334398	52540394	0.187043	18q21.2 - 18q21.31	1205997	17	Deletion	1.27797
18	52469614	52848035	NM_052834	WDR7	18	52540394	53189183	0.81296	18q21.31	648790	17	Deletion	1.26703
18	52965291	52968638	NR_033372	BOD1P	18	52540394	53189183	1	18q21.31	648790	17	Deletion	1.26703
18	53170719	53187160	NM_015879	ST8SIA3	18	52540394	53189183	1	18q21.31	648790	17	Deletion	1.26703
18	53253915	53309529	NM_004852	ONECUT2	18	53189183	53402615	1	18q21.31	213433	17	Deletion	1.27781
18	53363071	53404968	NM_000140	FECH	18	53189183	53402615	0.94384	18q21.31	213433	17	Deletion	1.27781
18	53363071	53404968	NM_001012515	FECH	18	53189183	53402615	0.94384	18q21.31	213433	17	Deletion	1.27781
18	57862438	58005270	NM_012327	PIGN	18	57742903	58150622	1	18q21.33	407720	17	Deletion	1.27057
18	57862438	58005270	NM_176787	PIGN	18	57742903	58150622	1	18q21.33	407720	17	Deletion	1.27057
18	58005504	58125336	NM_020854	KIAA1468	18	57742903	58150622	1	18q21.33	407720	17	Deletion	1.27057
18	58143528	58204485	NM_003839	TNFRSF11A	18	57742903	58150622	0.116392	18q21.33	407720	17	Deletion	1.27057
18	58533652	58798647	NM_194449	PHLPP1	18	58632522	59017465	0.6269	18q21.33	384944	17	Deletion	1.30495
18	58941559	59137594	NM_000633	BCL2	18	58632522	59017465	0.38721	18q21.33	384944	17	Deletion	1.30495
18	58941559	59137594	NM_000633	BCL2	18	59017465	59147334	0.612796	18q21.33	129870	17	Deletion	1.28713
18	59136167	59137594	NM_000657	BCL2	18	59017465	59147334	1	18q21.33	129870	17	Deletion	1.28713
18	59145951	59185487	NM_002035	KDSR	18	59017465	59147334	0.0350052	18q21.33	129870	17	Deletion	1.28713
18	59145951	59185487	NM_002035	KDSR	18	59169040	59300061	0.416015	18q21.33	131022	17	Deletion	1.26178
18	59207405	59240733	NM_004869	VPS4B	18	59169040	59300061	1	18q21.33	131022	17	Deletion	1.26178
18	59295124	59323299	NM_002639	SERPINB5	18	59169040	59300061	0.175256	18q21.33	131022	17	Deletion	1.26178
18	59295124	59323299	NM_002639	SERPINB5	18	59300061	59325270	0.82478	18q21.33	25210	17	Deletion	1.27636
18	59898223	59967241	NR_027245	C18orf20	18	59870460	60351499	1	18q22.1	481040	17	Deletion	1.2805
18	59922305	60241808	NR_033881	LOC284294	18	59870460	60351499	1	18q22.1	481040	17	Deletion	1.2805
18	60031298	60078271	NR_033983	LOC400654	18	59870460	60351499	1	18q22.1	481040	17	Deletion	1.2805
18	65219264	65667303	NM_152721	DOK6	18	65384441	66048450	0.631334	18q22.2	664010	17	Deletion	1.29128
18	65681173	65775213	NM_006566	CD226	18	65384441	66048450	1	18q22.2	664010	17	Deletion	1.29128
18	65822021	66023943	NM_173630	RTTN	18	65384441	66048450	1	18q22.2	664010	17	Deletion	1.29128
18	68354895	68362704	NM_182511	CBLN2	18	68256665	69132203	1	18q22.3	875539	17	Deletion	1.2958
18	68565767	68685791	NM_138966	NETO1	18	68256665	69132203	1	18q22.3	875539	17	Deletion	1.2958
18	68565767	68683915	NM_153181	NETO1	18	68256665	69132203	1	18q22.3	875539	17	Deletion	1.2958
18	68652255	68683915	NM_138999	NETO1	18	68256665	69132203	1	18q22.3	875539	17	Deletion	1.2958
18	68972273	69082714	NR_034133	LOC400655	18	68256665	69132203	1	18q22.3	875539	17	Deletion	1.2958
18	69891568	69966081	NM_001142958	FBXO15	18	69622422	70081489	1	18q22.3	459068	17	Deletion	1.28346
18	69891568	69965980	NM_152676	FBXO15	18	69622422	70081489	1	18q22.3	459068	17	Deletion	1.28346
18	69966726	69977185	NM_014177	C18orf55	18	69622422	70081489	1	18q22.3	459068	17	Deletion	1.28346
18	70071507	70110202	NM_001190807	CYB5A	18	69622422	70081489	0.257985	18q22.3	459068	17	Deletion	1.28346
18	70071507	70110202	NM_001914	CYB5A	18	69622422	70081489	0.257985	18q22.3	459068	17	Deletion	1.28346
18	70071507	70110202	NM_148923	CYB5A	18	69622422	70081489	0.257985	18q22.3	459068	17	Deletion	1.28346
18	74930385	75239271	NM_198531	ATP9B	18	75236353	75418654	0.00945006	18q23	182302	17	Deletion	1.28811
18	75256760	75390312	NM_006162	NFATC1	18	75236353	75418654	1	18q23	182302	17	Deletion	1.28811
18	75256760	75390312	NM_172388	NFATC1	18	75236353	75418654	1	18q23	182302	17	Deletion	1.28811
18	75256760	75329166	NM_172390	NFATC1	18	75236353	75418654	1	18q23	182302	17	Deletion	1.28811
18	75261314	75390312	NM_172387	NFATC1	18	75236353	75418654	1	18q23	182302	17	Deletion	1.28811
18	75261314	75390312	NM_172389	NFATC1	18	75236353	75418654	1	18q23	182302	17	Deletion	1.28811
18	75763408	75812642	NM_001146343	PQLC1	18	75791848	76115555	0.422362	18q23	323708	17	Deletion	1.31339
18	75763408	75812642	NM_001146345	PQLC1	18	75791848	76115555	0.422362	18q23	323708	17	Deletion	1.31339
18	75763408	75812642	NM_025078	PQLC1	18	75791848	76115555	0.422362	18q23	323708	17	Deletion	1.31339
18	75825570	75831812	NM_001136180	HSBP1L1	18	75791848	76115555	1	18q23	323708	17	Deletion	1.31339
18	75833855	75849521	NM_006701	TXNL4A	18	75791848	76115555	1	18q23	323708	17	Deletion	1.31339
18	75895334	75911641	NM_001171967	RBFA	18	75791848	76115555	1	18q23	323708	17	Deletion	1.31339
18	75895334	75911641	NM_024805	RBFA	18	75791848	76115555	1	18q23	323708	17	Deletion	1.31339
18	75967903	75999220	NM_014913	ADNP2	18	75791848	76115555	1	18q23	323708	17	Deletion	1.31339
18	76006798	76030608	NR_028339	LOC100130522	18	75791848	76115555	1	18q23	323708	17	Deletion	1.31339
18	76006798	76037307	NR_028340	LOC100130522	18	75791848	76115555	1	18q23	323708	17	Deletion	1.31339
18	76016106	76106389	NM_032510	PARD6G	18	75791848	76115555	1	18q23	323708	17	Deletion	1.31339
18	26132874	26132925	NR_031684	MIR302F	18	25848877	26212349	1	18q12.1	363473	16	Deletion	1.22653
18	33077006	33399999	NM_001025087	CELF4	18	33379786	33803802	0.0625832	18q12.2	424017	16	Deletion	1.24209
18	33077006	33399999	NM_001025088	CELF4	18	33379786	33803802	0.0625832	18q12.2	424017	16	Deletion	1.24209
18	33077006	33399999	NM_001025089	CELF4	18	33379786	33803802	0.0625832	18q12.2	424017	16	Deletion	1.24209
18	33077006	33399999	NM_020180	CELF4	18	33379786	33803802	0.0625832	18q12.2	424017	16	Deletion	1.24209
18	33491096	33491177	NR_036202	MIR4318	18	33379786	33803802	1	18q12.2	424017	16	Deletion	1.24209
18	37314234	37354560	NR_002838	KC6	18	36587297	37947394	1	18q12.3	1360098	16	Deletion	1.28965
18	37789197	37915445	NM_002647	PIK3C3	18	36587297	37947394	1	18q12.3	1360098	16	Deletion	1.28965
18	46007562	46046864	NM_145020	CCDC11	18	46012380	46139773	0.877414	18q21.1	127394	16	Deletion	1.27307
18	46049214	46062143	NM_002384	MBD1	18	46012380	46139773	1	18q21.1	127394	16	Deletion	1.27307
18	46049214	46062143	NM_015844	MBD1	18	46012380	46139773	1	18q21.1	127394	16	Deletion	1.27307
18	46049214	46062143	NM_015845	MBD1	18	46012380	46139773	1	18q21.1	127394	16	Deletion	1.27307
18	46049214	46062143	NM_015846	MBD1	18	46012380	46139773	1	18q21.1	127394	16	Deletion	1.27307
18	46049214	46062143	NM_015847	MBD1	18	46012380	46139773	1	18q21.1	127394	16	Deletion	1.27307
18	46062711	46068691	NM_001101654	CXXC1	18	46012380	46139773	1	18q21.1	127394	16	Deletion	1.27307
18	46062711	46068691	NM_014593	CXXC1	18	46012380	46139773	1	18q21.1	127394	16	Deletion	1.27307
18	46575488	46605753	NM_001127174	MRO	18	46534818	46579416	0.129816	18q21.2	44599	16	Deletion	1.31952
18	46575488	46600433	NM_001127175	MRO	18	46534818	46579416	0.1575	18q21.2	44599	16	Deletion	1.31952
18	46575488	46600433	NM_001127176	MRO	18	46534818	46579416	0.1575	18q21.2	44599	16	Deletion	1.31952
18	46575488	46600433	NM_031939	MRO	18	46534818	46579416	0.1575	18q21.2	44599	16	Deletion	1.31952
18	46659430	46730161	NM_001168335	ME2	18	46708849	46937024	0.30132	18q21.2	228176	16	Deletion	1.24912
18	46659430	46730161	NM_002396	ME2	18	46708849	46937024	0.30132	18q21.2	228176	16	Deletion	1.24912
18	46748385	46768489	NM_018696	ELAC1	18	46708849	46937024	1	18q21.2	228176	16	Deletion	1.24912
18	46810581	46865410	NM_005359	SMAD4	18	46708849	46937024	1	18q21.2	228176	16	Deletion	1.24912
18	59145951	59185487	NM_002035	KDSR	18	59147334	59169040	0.54903	18q21.33	21707	16	Deletion	1.27785
18	66107117	66148415	NM_004232	SOCS6	18	66048450	66145964	0.940652	18q22.2	97515	16	Deletion	1.28001
18	70071507	70110202	NM_001190807	CYB5A	18	70081489	72643111	0.742041	18q22.3 - 18q23	2561623	16	Deletion	1.28165
18	70071507	70110202	NM_001914	CYB5A	18	70081489	72643111	0.742041	18q22.3 - 18q23	2561623	16	Deletion	1.28165
18	70071507	70110202	NM_148923	CYB5A	18	70081489	72643111	0.742041	18q22.3 - 18q23	2561623	16	Deletion	1.28165
18	70134090	70177403	NM_001174123	DKFZP781G0119	18	70081489	72643111	1	18q22.3 - 18q23	2561623	16	Deletion	1.28165
18	70253943	70275484	NM_001044369	FAM69C	18	70081489	72643111	1	18q22.3 - 18q23	2561623	16	Deletion	1.28165
18	70314480	70341670	NM_018235	CNDP2	18	70081489	72643111	1	18q22.3 - 18q23	2561623	16	Deletion	1.28165
18	70317803	70341670	NM_001168499	CNDP2	18	70081489	72643111	1	18q22.3 - 18q23	2561623	16	Deletion	1.28165
18	70352672	70403242	NM_032649	CNDP1	18	70081489	72643111	1	18q22.3 - 18q23	2561623	16	Deletion	1.28165
18	70409990	70416052	NR_024484	LOC400657	18	70081489	72643111	1	18q22.3 - 18q23	2561623	16	Deletion	1.28165
18	70471907	70762002	NM_001146189	ZNF407	18	70081489	72643111	1	18q22.3 - 18q23	2561623	16	Deletion	1.28165
18	70471907	70645572	NM_001146190	ZNF407	18	70081489	72643111	1	18q22.3 - 18q23	2561623	16	Deletion	1.28165
18	70471907	70906617	NM_017757	ZNF407	18	70081489	72643111	1	18q22.3 - 18q23	2561623	16	Deletion	1.28165
18	71038266	71050270	NM_175907	ZADH2	18	70081489	72643111	1	18q22.3 - 18q23	2561623	16	Deletion	1.28165
18	71051719	71130890	NM_005786	TSHZ1	18	70081489	72643111	1	18q22.3 - 18q23	2561623	16	Deletion	1.28165
18	71250815	71268578	NM_001037331	C18orf62	18	70081489	72643111	1	18q22.3 - 18q23	2561623	16	Deletion	1.28165
18	72198625	72336135	NM_014643	ZNF516	18	70081489	72643111	1	18q22.3 - 18q23	2561623	16	Deletion	1.28165
18	72369600	72400773	NR_015417	LOC284276	18	70081489	72643111	1	18q22.3 - 18q23	2561623	16	Deletion	1.28165
18	73090996	73111085	NM_001480	GALR1	18	72983552	73325061	1	18q23	341510	16	Deletion	1.28615
18	74841263	74859182	NM_171999	SALL3	18	74346261	75236353	1	18q23	890093	16	Deletion	1.28626
18	74930385	75239271	NM_198531	ATP9B	18	74346261	75236353	0.990553	18q23	890093	16	Deletion	1.28626
18	31302289	31331954	NM_001098817	INO80C	18	31215225	31802040	1	18q12.2	586816	15	Deletion	1.25321
18	31302289	31331954	NM_194281	INO80C	18	31215225	31802040	1	18q12.2	586816	15	Deletion	1.25321
18	31488531	31545797	NM_020474	GALNT1	18	31215225	31802040	1	18q12.2	586816	15	Deletion	1.25321
18	31738779	31738888	NR_029616	MIR187	18	31215225	31802040	1	18q12.2	586816	15	Deletion	1.25321
18	31806586	31813240	NM_031446	C18orf21	18	31802040	33379786	1	18q12.2	1577747	15	Deletion	1.23605
18	31823790	31901372	NM_018170	RPRD1A	18	31802040	33379786	1	18q12.2	1577747	15	Deletion	1.23605
18	31942492	31963356	NM_012319	SLC39A6	18	31802040	33379786	1	18q12.2	1577747	15	Deletion	1.23605
18	31944961	31963356	NM_001099406	SLC39A6	18	31802040	33379786	1	18q12.2	1577747	15	Deletion	1.23605
18	31963885	32008606	NM_018255	ELP2	18	31802040	33379786	1	18q12.2	1577747	15	Deletion	1.23605
18	32021478	32102684	NM_017947	MOCOS	18	31802040	33379786	1	18q12.2	1577747	15	Deletion	1.23605
18	32131700	32614017	NM_025135	FHOD3	18	31802040	33379786	1	18q12.2	1577747	15	Deletion	1.23605
18	32630032	32663157	NM_015476	C18orf10	18	31802040	33379786	1	18q12.2	1577747	15	Deletion	1.23605
18	32663078	33059287	NM_020776	KIAA1328	18	31802040	33379786	1	18q12.2	1577747	15	Deletion	1.23605
18	33077006	33399999	NM_001025087	CELF4	18	31802040	33379786	0.93742	18q12.2	1577747	15	Deletion	1.23605
18	33077006	33399999	NM_001025088	CELF4	18	31802040	33379786	0.93742	18q12.2	1577747	15	Deletion	1.23605
18	33077006	33399999	NM_001025089	CELF4	18	31802040	33379786	0.93742	18q12.2	1577747	15	Deletion	1.23605
18	33077006	33399999	NM_020180	CELF4	18	31802040	33379786	0.93742	18q12.2	1577747	15	Deletion	1.23605
18	38577190	38949656	NM_002930	RIT2	18	38489081	40094065	1	18q12.3	1604985	15	Deletion	1.27116
18	39101855	39111614	NM_020783	SYT4	18	38489081	40094065	1	18q12.3	1604985	15	Deletion	1.27116
18	42513079	42591038	NM_013305	ST8SIA5	18	42503950	43366951	1	18q21.1	863002	15	Deletion	1.25103
18	42646058	42751465	NM_004671	PIAS2	18	42503950	43366951	1	18q21.1	863002	15	Deletion	1.25103
18	42652312	42751465	NM_173206	PIAS2	18	42503950	43366951	1	18q21.1	863002	15	Deletion	1.25103
18	42780785	42882613	NM_031303	KATNAL2	18	42503950	43366951	1	18q21.1	863002	15	Deletion	1.25103
18	42796729	42798370	NM_001100817	TCEB3CL	18	42503950	43366951	1	18q21.1	863002	15	Deletion	1.25103
18	42802656	42804533	NM_145653	TCEB3C	18	42503950	43366951	1	18q21.1	863002	15	Deletion	1.25103
18	42802656	42804297	NM_001100817.1	TCEB3CL	18	42503950	43366951	1	18q21.1	863002	15	Deletion	1.25103
18	42808571	42810448	NM_145653.1	TCEB3C	18	42503950	43366951	1	18q21.1	863002	15	Deletion	1.25103
18	42808571	42810212	NM_001100817.2	TCEB3CL	18	42503950	43366951	1	18q21.1	863002	15	Deletion	1.25103
18	42812941	42815987	NM_016427	TCEB3B	18	42503950	43366951	1	18q21.1	863002	15	Deletion	1.25103
18	42887779	42930870	NM_032124	HDHD2	18	42503950	43366951	1	18q21.1	863002	15	Deletion	1.25103
18	42935411	42956744	NM_016097	IER3IP1	18	42503950	43366951	1	18q21.1	863002	15	Deletion	1.25103
18	43807637	43917679	NM_001039360	ZBTB7C	18	43729671	45532837	1	18q21.1	1803167	15	Deletion	1.25264
18	44319425	44643585	NM_001142397	KIAA0427	18	43729671	45532837	1	18q21.1	1803167	15	Deletion	1.25264
18	44319425	44643585	NM_014772	KIAA0427	18	43729671	45532837	1	18q21.1	1803167	15	Deletion	1.25264
18	44700221	44731080	NM_001190821	SMAD7	18	43729671	45532837	1	18q21.1	1803167	15	Deletion	1.25264
18	44700221	44729702	NM_001190822	SMAD7	18	43729671	45532837	1	18q21.1	1803167	15	Deletion	1.25264
18	44700221	44723176	NM_001190823	SMAD7	18	43729671	45532837	1	18q21.1	1803167	15	Deletion	1.25264
18	44700221	44731080	NM_005904	SMAD7	18	43729671	45532837	1	18q21.1	1803167	15	Deletion	1.25264
18	44824170	45241078	NM_017653	DYM	18	43729671	45532837	1	18q21.1	1803167	15	Deletion	1.25264
18	45261546	45267643	NM_001035005	C18orf32	18	43729671	45532837	1	18q21.1	1803167	15	Deletion	1.25264
18	45261546	45267643	NM_001199346	C18orf32	18	43729671	45532837	1	18q21.1	1803167	15	Deletion	1.25264
18	45261546	45271953	NM_001199355	RPL17-C18ORF32	18	43729671	45532837	1	18q21.1	1803167	15	Deletion	1.25264
18	45261546	45272934	NM_001199356	RPL17-C18ORF32	18	43729671	45532837	1	18q21.1	1803167	15	Deletion	1.25264
18	45267741	45267791	NR_031720	MIR1539	18	43729671	45532837	1	18q21.1	1803167	15	Deletion	1.25264
18	45268849	45272934	NM_000985	RPL17	18	43729671	45532837	1	18q21.1	1803167	15	Deletion	1.25264
18	45268849	45272934	NM_001035006	RPL17	18	43729671	45532837	1	18q21.1	1803167	15	Deletion	1.25264
18	45268849	45272934	NM_001199340	RPL17	18	43729671	45532837	1	18q21.1	1803167	15	Deletion	1.25264
18	45268849	45272833	NM_001199341	RPL17	18	43729671	45532837	1	18q21.1	1803167	15	Deletion	1.25264
18	45268849	45272833	NM_001199342	RPL17	18	43729671	45532837	1	18q21.1	1803167	15	Deletion	1.25264
18	45268849	45272833	NM_001199343	RPL17	18	43729671	45532837	1	18q21.1	1803167	15	Deletion	1.25264
18	45268849	45272833	NM_001199344	RPL17	18	43729671	45532837	1	18q21.1	1803167	15	Deletion	1.25264
18	45268849	45272934	NM_001199345	RPL17	18	43729671	45532837	1	18q21.1	1803167	15	Deletion	1.25264
18	45269603	45269693	NR_003701	SNORD58C	18	43729671	45532837	1	18q21.1	1803167	15	Deletion	1.25264
18	45269612	45269677	NR_002573	U58	18	43729671	45532837	1	18q21.1	1803167	15	Deletion	1.25264
18	45271651	45271716	NR_002571	SNORD58A	18	43729671	45532837	1	18q21.1	1803167	15	Deletion	1.25264
18	45272032	45272098	NR_002572	SNORD58B	18	43729671	45532837	1	18q21.1	1803167	15	Deletion	1.25264
18	45342425	45373277	NM_006033	LIPG	18	43729671	45532837	1	18q21.1	1803167	15	Deletion	1.25264
18	45563872	45594250	NM_006111	ACAA2	18	45532837	46012380	1	18q21.1	479544	15	Deletion	1.26924
18	45594391	45594812	NR_003003	SCARNA17	18	45532837	46012380	1	18q21.1	479544	15	Deletion	1.26924
18	45603154	45975450	NM_001080467	MYO5B	18	45532837	46012380	1	18q21.1	479544	15	Deletion	1.26924
18	45906867	45906932	NR_036204	MIR4320	18	45532837	46012380	1	18q21.1	479544	15	Deletion	1.26924
18	46007562	46046864	NM_145020	CCDC11	18	45532837	46012380	0.122612	18q21.1	479544	15	Deletion	1.26924
18	66107117	66148415	NM_004232	SOCS6	18	66145964	66367046	0.0593719	18q22.2	221083	15	Deletion	1.30226
18	72665104	72811671	NM_007345	ZNF236	18	72643111	72983552	1	18q23	340442	15	Deletion	1.31479
18	72819777	72858044	NM_001025081	MBP	18	72643111	72983552	1	18q23	340442	15	Deletion	1.31479
18	72819777	72858044	NM_001025090	MBP	18	72643111	72983552	1	18q23	340442	15	Deletion	1.31479
18	72819777	72858044	NM_001025092	MBP	18	72643111	72983552	1	18q23	340442	15	Deletion	1.31479
18	72819777	72973763	NM_001025101	MBP	18	72643111	72983552	1	18q23	340442	15	Deletion	1.31479
18	72819777	72858044	NM_002385	MBP	18	72643111	72983552	1	18q23	340442	15	Deletion	1.31479
18	72853727	72973763	NM_001025100	MBP	18	72643111	72983552	1	18q23	340442	15	Deletion	1.31479
8	13991744	15140164	NM_139167	SGCZ	8	14081324	14363236	0.245479	8p22	281913	15	Deletion	1.32981
18	22749593	23019288	NM_031422	CHST9	18	22785742	23788844	0.865964	18q11.2 - 18q12.1	1003103	14	Deletion	1.15128
18	23784928	24011444	NM_001792	CDH2	18	22785742	23788844	0.0172923	18q11.2 - 18q12.1	1003103	14	Deletion	1.15128
18	23784928	24011444	NM_001792	CDH2	18	23788844	24396679	0.982712	18q12.1	607836	14	Deletion	1.20521
18	26824050	26876780	NM_001941	DSC3	18	26430146	29851765	1	18q12.1	3421620	14	Deletion	1.25495
18	26824050	26876780	NM_024423	DSC3	18	26430146	29851765	1	18q12.1	3421620	14	Deletion	1.25495
18	26899940	26936387	NM_004949	DSC2	18	26430146	29851765	1	18q12.1	3421620	14	Deletion	1.25495
18	26899940	26936387	NM_024422	DSC2	18	26430146	29851765	1	18q12.1	3421620	14	Deletion	1.25495
18	26963212	26996818	NM_004948	DSC1	18	26430146	29851765	1	18q12.1	3421620	14	Deletion	1.25495
18	26963212	26996818	NM_024421	DSC1	18	26430146	29851765	1	18q12.1	3421620	14	Deletion	1.25495
18	27152050	27191392	NM_001942	DSG1	18	26430146	29851765	1	18q12.1	3421620	14	Deletion	1.25495
18	27210738	27247879	NM_001134453	DSG4	18	26430146	29851765	1	18q12.1	3421620	14	Deletion	1.25495
18	27210738	27247879	NM_177986	DSG4	18	26430146	29851765	1	18q12.1	3421620	14	Deletion	1.25495
18	27281730	27312664	NM_001944	DSG3	18	26430146	29851765	1	18q12.1	3421620	14	Deletion	1.25495
18	27332025	27382813	NM_001943	DSG2	18	26430146	29851765	1	18q12.1	3421620	14	Deletion	1.25495
18	27425728	27432985	NM_000371	TTR	18	26430146	29851765	1	18q12.1	3421620	14	Deletion	1.25495
18	27456207	27518685	NM_004775	B4GALT6	18	26430146	29851765	1	18q12.1	3421620	14	Deletion	1.25495
18	27593657	27594842	NM_001034172	MCART2	18	26430146	29851765	1	18q12.1	3421620	14	Deletion	1.25495
18	27663134	27777090	NM_014939	TRAPPC8	18	26430146	29851765	1	18q12.1	3421620	14	Deletion	1.25495
18	27852443	27907153	NM_017831	RNF125	18	26430146	29851765	1	18q12.1	3421620	14	Deletion	1.25495
18	27925816	27965523	NM_016271	RNF138	18	26430146	29851765	1	18q12.1	3421620	14	Deletion	1.25495
18	27926567	27965523	NM_001191324	RNF138	18	26430146	29851765	1	18q12.1	3421620	14	Deletion	1.25495
18	27926567	27965523	NM_198128	RNF138	18	26430146	29851765	1	18q12.1	3421620	14	Deletion	1.25495
18	28023985	28054365	NM_005925	MEP1B	18	26430146	29851765	1	18q12.1	3421620	14	Deletion	1.25495
18	28101475	28304446	NM_022751	FAM59A	18	26430146	29851765	1	18q12.1	3421620	14	Deletion	1.25495
18	28345624	28348596	NR_003558	WBP11P1	18	26430146	29851765	1	18q12.1	3421620	14	Deletion	1.25495
18	28506632	28606973	NM_020805	KLHL14	18	26430146	29851765	1	18q12.1	3421620	14	Deletion	1.25495
18	28771364	29274044	NM_001105528	C18orf34	18	26430146	29851765	1	18q12.1	3421620	14	Deletion	1.25495
18	28771364	29274684	NM_198995	C18orf34	18	26430146	29851765	1	18q12.1	3421620	14	Deletion	1.25495
18	29412539	29581398	NM_030632	ASXL3	18	26430146	29851765	1	18q12.1	3421620	14	Deletion	1.25495
18	29685062	30057514	NM_001198546	NOL4	18	26430146	29851765	0.447584	18q12.1	3421620	14	Deletion	1.25495
18	29685062	30056433	NM_001198547	NOL4	18	26430146	29851765	0.448887	18q12.1	3421620	14	Deletion	1.25495
18	29685062	30057514	NM_001198548	NOL4	18	26430146	29851765	0.447584	18q12.1	3421620	14	Deletion	1.25495
18	29685062	29882575	NM_001198549	NOL4	18	26430146	29851765	0.844011	18q12.1	3421620	14	Deletion	1.25495
18	29685062	30057514	NM_003787	NOL4	18	26430146	29851765	0.447584	18q12.1	3421620	14	Deletion	1.25495
18	29685062	30056433	NR_036752	NOL4	18	26430146	29851765	0.448887	18q12.1	3421620	14	Deletion	1.25495
18	30327252	30702775	NM_001198945	DTNA	18	30146111	31051309	1	18q12.1 - 18q12.2	905199	14	Deletion	1.25521
18	30327252	30663291	NM_001392	DTNA	18	30146111	31051309	1	18q12.1 - 18q12.2	905199	14	Deletion	1.25521
18	30327252	30725807	NM_032975	DTNA	18	30146111	31051309	1	18q12.1 - 18q12.2	905199	14	Deletion	1.25521
18	30327252	30702775	NM_032979	DTNA	18	30146111	31051309	1	18q12.1 - 18q12.2	905199	14	Deletion	1.25521
18	30427280	30663291	NM_001128175	DTNA	18	30146111	31051309	1	18q12.1 - 18q12.2	905199	14	Deletion	1.25521
18	30427280	30725807	NM_001198938	DTNA	18	30146111	31051309	1	18q12.1 - 18q12.2	905199	14	Deletion	1.25521
18	30427280	30725807	NM_001198939	DTNA	18	30146111	31051309	1	18q12.1 - 18q12.2	905199	14	Deletion	1.25521
18	30427280	30725807	NM_001198940	DTNA	18	30146111	31051309	1	18q12.1 - 18q12.2	905199	14	Deletion	1.25521
18	30544194	30702775	NM_001198941	DTNA	18	30146111	31051309	1	18q12.1 - 18q12.2	905199	14	Deletion	1.25521
18	30544194	30702775	NM_032978	DTNA	18	30146111	31051309	1	18q12.1 - 18q12.2	905199	14	Deletion	1.25521
18	30589938	30725807	NM_001390	DTNA	18	30146111	31051309	1	18q12.1 - 18q12.2	905199	14	Deletion	1.25521
18	30589938	30702775	NM_001391	DTNA	18	30146111	31051309	1	18q12.1 - 18q12.2	905199	14	Deletion	1.25521
18	30651924	30725807	NM_001198943	DTNA	18	30146111	31051309	1	18q12.1 - 18q12.2	905199	14	Deletion	1.25521
18	30652245	30725807	NM_001198942	DTNA	18	30146111	31051309	1	18q12.1 - 18q12.2	905199	14	Deletion	1.25521
18	30652245	30725807	NM_001198944	DTNA	18	30146111	31051309	1	18q12.1 - 18q12.2	905199	14	Deletion	1.25521
18	30652300	30725807	NM_032980	DTNA	18	30146111	31051309	1	18q12.1 - 18q12.2	905199	14	Deletion	1.25521
18	30652300	30702775	NM_032981	DTNA	18	30146111	31051309	1	18q12.1 - 18q12.2	905199	14	Deletion	1.25521
18	30810890	30976377	NM_001143826	MAPRE2	18	30146111	31051309	1	18q12.1 - 18q12.2	905199	14	Deletion	1.25521
18	30812206	30976377	NM_001143827	MAPRE2	18	30146111	31051309	1	18q12.1 - 18q12.2	905199	14	Deletion	1.25521
18	30875322	30976377	NM_014268	MAPRE2	18	30146111	31051309	1	18q12.1 - 18q12.2	905199	14	Deletion	1.25521
18	30875322	30976377	NR_026570	MAPRE2	18	30146111	31051309	1	18q12.1 - 18q12.2	905199	14	Deletion	1.25521
18	31074992	31081152	NM_001135178	ZNF397	18	31051309	31215225	1	18q12.2	163917	14	Deletion	1.2407
18	31074992	31092396	NM_032347	ZNF397	18	31051309	31215225	1	18q12.2	163917	14	Deletion	1.2407
18	31085021	31124195	NM_001112734	ZSCAN30	18	31051309	31215225	1	18q12.2	163917	14	Deletion	1.2407
18	31085021	31124195	NM_001166012	ZSCAN30	18	31051309	31215225	1	18q12.2	163917	14	Deletion	1.2407
18	31124234	31144729	NR_024565	ZNF271	18	31051309	31215225	1	18q12.2	163917	14	Deletion	1.2407
18	31124234	31144729	NR_024566	ZNF271	18	31051309	31215225	1	18q12.2	163917	14	Deletion	1.2407
18	31166176	31178425	NM_006965	ZNF24	18	31051309	31215225	1	18q12.2	163917	14	Deletion	1.2407
18	31200659	31211300	NM_145756	ZNF396	18	31051309	31215225	1	18q12.2	163917	14	Deletion	1.2407
18	40514136	40711378	NM_001130110	SETBP1	18	40411143	42503950	1	18q12.3 - 18q21.1	2092808	14	Deletion	1.24108
18	40514861	40902474	NM_015559	SETBP1	18	40411143	42503950	1	18q12.3 - 18q21.1	2092808	14	Deletion	1.24108
18	40804045	40804130	NR_036203	MIR4319	18	40411143	42503950	1	18q12.3 - 18q21.1	2092808	14	Deletion	1.24108
18	41448764	41517059	NM_007163	SLC14A2	18	40411143	42503950	1	18q12.3 - 18q21.1	2092808	14	Deletion	1.24108
18	41558090	41586484	NM_001128588	SLC14A1	18	40411143	42503950	1	18q12.3 - 18q21.1	2092808	14	Deletion	1.24108
18	41558090	41586484	NM_001146036	SLC14A1	18	40411143	42503950	1	18q12.3 - 18q21.1	2092808	14	Deletion	1.24108
18	41558090	41586484	NM_015865	SLC14A1	18	40411143	42503950	1	18q12.3 - 18q21.1	2092808	14	Deletion	1.24108
18	41560916	41586484	NM_001146037	SLC14A1	18	40411143	42503950	1	18q12.3 - 18q21.1	2092808	14	Deletion	1.24108
18	41659543	41676520	NM_213602	SIGLEC15	18	40411143	42503950	1	18q12.3 - 18q21.1	2092808	14	Deletion	1.24108
18	41681572	41801304	NM_020964	KIAA1632	18	40411143	42503950	1	18q12.3 - 18q21.1	2092808	14	Deletion	1.24108
18	41817500	41906249	NM_024430	PSTPIP2	18	40411143	42503950	1	18q12.3 - 18q21.1	2092808	14	Deletion	1.24108
18	41918108	41938198	NM_001001937	ATP5A1	18	40411143	42503950	1	18q12.3 - 18q21.1	2092808	14	Deletion	1.24108
18	41918108	41932286	NM_004046	ATP5A1	18	40411143	42503950	1	18q12.3 - 18q21.1	2092808	14	Deletion	1.24108
18	41938296	41962298	NM_138443	HAUS1	18	40411143	42503950	1	18q12.3 - 18q21.1	2092808	14	Deletion	1.24108
18	41938296	41962298	NR_026978	HAUS1	18	40411143	42503950	1	18q12.3 - 18q21.1	2092808	14	Deletion	1.24108
18	42007986	42100954	NM_001008239	C18orf25	18	40411143	42503950	1	18q12.3 - 18q21.1	2092808	14	Deletion	1.24108
18	42007986	42100954	NM_145055	C18orf25	18	40411143	42503950	1	18q12.3 - 18q21.1	2092808	14	Deletion	1.24108
18	42168185	42294782	NM_152470	RNF165	18	40411143	42503950	1	18q12.3 - 18q21.1	2092808	14	Deletion	1.24108
18	42310933	42393269	NM_001145472	LOXHD1	18	40411143	42503950	1	18q12.3 - 18q21.1	2092808	14	Deletion	1.24108
18	42310933	42353048	NM_001173129	LOXHD1	18	40411143	42503950	1	18q12.3 - 18q21.1	2092808	14	Deletion	1.24108
18	42311215	42353048	NM_001145473	LOXHD1	18	40411143	42503950	1	18q12.3 - 18q21.1	2092808	14	Deletion	1.24108
18	42311215	42490995	NM_144612	LOXHD1	18	40411143	42503950	1	18q12.3 - 18q21.1	2092808	14	Deletion	1.24108
18	43613464	43711511	NM_001003652	SMAD2	18	43709197	43729671	0.0236109	18q21.1	20475	14	Deletion	1.25647
18	43613464	43711514	NM_001135937	SMAD2	18	43709197	43729671	0.0236408	18q21.1	20475	14	Deletion	1.25647
18	43613464	43710925	NM_005901	SMAD2	18	43709197	43729671	0.0177402	18q21.1	20475	14	Deletion	1.25647
8	13991744	15140164	NM_139167	SGCZ	8	13935681	14081324	0.0780036	8p22	145644	14	Deletion	1.32204
8	13991744	15140164	NM_139167	SGCZ	8	14363236	14646498	0.246654	8p22	283263	14	Deletion	1.33362
8	13991744	15140164	NM_139167	SGCZ	8	14646498	14954404	0.268113	8p22	307907	14	Deletion	1.32044
8	14755318	14755391	NR_029875	MIR383	8	14646498	14954404	1	8p22	307907	14	Deletion	1.32044
18	22699270	22769909	NR_026908	C18orf16	18	22720502	22785742	0.699434	18q11.2	65241	13	Deletion	1.14049
18	22749593	23019288	NM_031422	CHST9	18	22720502	22785742	0.13404	18q11.2	65241	13	Deletion	1.14049
18	29685062	30057514	NM_001198546	NOL4	18	29851765	30146111	0.552419	18q12.1	294347	13	Deletion	1.2635
18	29685062	30056433	NM_001198547	NOL4	18	29851765	30146111	0.551116	18q12.1	294347	13	Deletion	1.2635
18	29685062	30057514	NM_001198548	NOL4	18	29851765	30146111	0.552419	18q12.1	294347	13	Deletion	1.2635
18	29685062	29882575	NM_001198549	NOL4	18	29851765	30146111	0.155994	18q12.1	294347	13	Deletion	1.2635
18	29685062	30057514	NM_003787	NOL4	18	29851765	30146111	0.552419	18q12.1	294347	13	Deletion	1.2635
18	29685062	30056433	NR_036752	NOL4	18	29851765	30146111	0.551116	18q12.1	294347	13	Deletion	1.2635
18	43613464	43711511	NM_001003652	SMAD2	18	43446676	43709197	0.976399	18q21.1	262522	13	Deletion	1.30212
18	43613464	43711514	NM_001135937	SMAD2	18	43446676	43709197	0.976369	18q21.1	262522	13	Deletion	1.30212
18	43613464	43710925	NM_005901	SMAD2	18	43446676	43709197	0.98227	18q21.1	262522	13	Deletion	1.30212
17	11442473	11813791	NM_001372	DNAH9	17	11479067	11579390	0.270183	17p12	100324	13	Deletion	1.22537
17	11442473	11813791	NM_001372	DNAH9	17	11579390	11720933	0.381192	17p12	141544	13	Deletion	1.21041
17	17321025	17337260	NM_018019	MED9	17	17240566	17659004	1	17p11.2	418439	13	Deletion	1.2489
17	17338478	17340435	NM_001199989	RASD1	17	17240566	17659004	1	17p11.2	418439	13	Deletion	1.2489
17	17338478	17340435	NM_016084	RASD1	17	17240566	17659004	1	17p11.2	418439	13	Deletion	1.2489
17	17349602	17426471	NM_007169	PEMT	17	17240566	17659004	1	17p11.2	418439	13	Deletion	1.2489
17	17349602	17435720	NM_148172	PEMT	17	17240566	17659004	1	17p11.2	418439	13	Deletion	1.2489
17	17349602	17421505	NM_148173	PEMT	17	17240566	17659004	1	17p11.2	418439	13	Deletion	1.2489
17	17525512	17655491	NM_030665	RAI1	17	17240566	17659004	1	17p11.2	418439	13	Deletion	1.2489
17	17620725	17623569	NR_024007	SMCR5	17	17240566	17659004	1	17p11.2	418439	13	Deletion	1.2489
17	17655388	17681051	NM_001005291	SREBF1	17	17240566	17659004	0.140937	17p11.2	418439	13	Deletion	1.2489
17	17655388	17681051	NM_004176	SREBF1	17	17240566	17659004	0.140937	17p11.2	418439	13	Deletion	1.2489
17	17657875	17657971	NR_030361	MIR33B	17	17240566	17659004	1	17p11.2	418439	13	Deletion	1.2489
8	8897724	8928260	NM_153332	ERI1	8	8824244	11890206	1	8p23.1	3065963	13	Deletion	1.40185
8	9031177	9045631	NM_024607	PPP1R3B	8	8824244	11890206	1	8p23.1	3065963	13	Deletion	1.40185
8	9450855	9677267	NM_003747	TNKS	8	8824244	11890206	1	8p23.1	3065963	13	Deletion	1.40185
8	9636592	9636689	NR_030327	MIR597	8	8824244	11890206	1	8p23.1	3065963	13	Deletion	1.40185
8	9794984	9798250	NR_024281	LOC157627	8	8824244	11890206	1	8p23.1	3065963	13	Deletion	1.40185
8	9798308	9798393	NR_029668	MIR124-1	8	8824244	11890206	1	8p23.1	3065963	13	Deletion	1.40185
8	9949240	10323812	NM_001135670	MSRA	8	8824244	11890206	1	8p23.1	3065963	13	Deletion	1.40185
8	9949240	10323812	NM_012331	MSRA	8	8824244	11890206	1	8p23.1	3065963	13	Deletion	1.40185
8	9990476	10323812	NM_001135671	MSRA	8	8824244	11890206	1	8p23.1	3065963	13	Deletion	1.40185
8	9990476	10323812	NM_001199729	MSRA	8	8824244	11890206	1	8p23.1	3065963	13	Deletion	1.40185
8	10420466	10449087	NM_001197020	PRSS55	8	8824244	11890206	1	8p23.1	3065963	13	Deletion	1.40185
8	10420466	10433744	NM_198464	PRSS55	8	8824244	11890206	1	8p23.1	3065963	13	Deletion	1.40185
8	10501270	10550028	NM_178857	RP1L1	8	8824244	11890206	1	8p23.1	3065963	13	Deletion	1.40185
8	10561898	10561991	NR_036248	MIR4286	8	8824244	11890206	1	8p23.1	3065963	13	Deletion	1.40185
8	10567557	10595514	NM_001040032	C8orf74	8	8824244	11890206	1	8p23.1	3065963	13	Deletion	1.40185
8	10618688	10625433	NM_031439	SOX7	8	8824244	11890206	1	8p23.1	3065963	13	Deletion	1.40185
8	10660294	10734710	NM_017884	PINX1	8	8824244	11890206	1	8p23.1	3065963	13	Deletion	1.40185
8	10720293	10720364	NR_031711	MIR1322	8	8824244	11890206	1	8p23.1	3065963	13	Deletion	1.40185
8	10791067	11096286	NM_173683	XKR6	8	8824244	11890206	1	8p23.1	3065963	13	Deletion	1.40185
8	10930126	10930223	NR_030328	MIR598	8	8824244	11890206	1	8p23.1	3065963	13	Deletion	1.40185
8	11179410	11223065	NM_015458	MTMR9	8	8824244	11890206	1	8p23.1	3065963	13	Deletion	1.40185
8	11225905	11227106	NM_054028	AMAC1L2	8	8824244	11890206	1	8p23.1	3065963	13	Deletion	1.40185
8	11234556	11263372	NR_001578	TDH	8	8824244	11890206	1	8p23.1	3065963	13	Deletion	1.40185
8	11263321	11333577	NR_026814	C8orf12	8	8824244	11890206	1	8p23.1	3065963	13	Deletion	1.40185
8	11316383	11361687	NM_053279	FAM167A	8	8824244	11890206	1	8p23.1	3065963	13	Deletion	1.40185
8	11388930	11459518	NM_001715	BLK	8	8824244	11890206	1	8p23.1	3065963	13	Deletion	1.40185
8	11599126	11654919	NM_002052	GATA4	8	8824244	11890206	1	8p23.1	3065963	13	Deletion	1.40185
8	11664581	11682264	NM_001135746	NEIL2	8	8824244	11890206	1	8p23.1	3065963	13	Deletion	1.40185
8	11664581	11682264	NM_001135747	NEIL2	8	8824244	11890206	1	8p23.1	3065963	13	Deletion	1.40185
8	11664581	11682264	NM_001135748	NEIL2	8	8824244	11890206	1	8p23.1	3065963	13	Deletion	1.40185
8	11664581	11682264	NM_145043	NEIL2	8	8824244	11890206	1	8p23.1	3065963	13	Deletion	1.40185
8	11697599	11734228	NM_004462	FDFT1	8	8824244	11890206	1	8p23.1	3065963	13	Deletion	1.40185
8	11737443	11763056	NM_001908	CTSB	8	8824244	11890206	1	8p23.1	3065963	13	Deletion	1.40185
8	11737443	11763056	NM_147780	CTSB	8	8824244	11890206	1	8p23.1	3065963	13	Deletion	1.40185
8	11737443	11763056	NM_147781	CTSB	8	8824244	11890206	1	8p23.1	3065963	13	Deletion	1.40185
8	11737443	11763056	NM_147782	CTSB	8	8824244	11890206	1	8p23.1	3065963	13	Deletion	1.40185
8	11737443	11763056	NM_147783	CTSB	8	8824244	11890206	1	8p23.1	3065963	13	Deletion	1.40185
8	11868855	11869518	NM_001033018	DEFB136	8	8824244	11890206	1	8p23.1	3065963	13	Deletion	1.40185
8	11877239	11879509	NM_001033017	DEFB135	8	8824244	11890206	1	8p23.1	3065963	13	Deletion	1.40185
8	11888898	11891170	NM_001033019	DEFB134	8	8824244	11890206	0.575891	8p23.1	3065963	13	Deletion	1.40185
8	12985243	13416801	NM_182643	DLC1	8	13296429	13672178	0.278926	8p22	375750	13	Deletion	1.36947
8	13206487	13416801	NM_024767	DLC1	8	13296429	13672178	0.572346	8p22	375750	13	Deletion	1.36947
8	13468723	13470169	NM_001007090	C8orf48	8	13296429	13672178	1	8p22	375750	13	Deletion	1.36947
8	13991744	15140164	NM_139167	SGCZ	8	14954404	15659631	0.161753	8p22	705228	13	Deletion	1.31134
8	15442101	15666367	NM_006765	TUSC3	8	14954404	15659631	0.969964	8p22	705228	13	Deletion	1.31134
8	15442101	15666367	NM_006765	TUSC3	8	15659631	15855971	0.0300401	8p22	196341	13	Deletion	1.3387
8	15442101	15666367	NM_178234	TUSC3	8	14954404	15659631	0.969964	8p22	705228	13	Deletion	1.31134
8	15442101	15666367	NM_178234	TUSC3	8	15659631	15855971	0.0300401	8p22	196341	13	Deletion	1.3387
8	16009758	16094672	NM_138715	MSR1	8	15855971	16511138	1	8p22	655168	13	Deletion	1.34987
8	16009758	16094672	NM_138716	MSR1	8	15855971	16511138	1	8p22	655168	13	Deletion	1.34987
8	16041197	16094672	NM_002445	MSR1	8	15855971	16511138	1	8p22	655168	13	Deletion	1.34987
8	16894705	16904046	NM_019851	FGF20	8	16511138	17042033	1	8p22	530896	13	Deletion	1.38462
8	16929118	17024520	NM_181723	EFHA2	8	16511138	17042033	1	8p22	530896	13	Deletion	1.38462
8	18429093	18915477	NM_015310	PSD3	8	18571258	19928663	0.707711	8p22 - 8p21.3	1357406	13	Deletion	1.38698
8	18429093	18710686	NM_206909	PSD3	8	18571258	19928663	0.495142	8p22 - 8p21.3	1357406	13	Deletion	1.38698
8	19215361	19298010	NM_001174160	SH2D4A	8	18571258	19928663	1	8p22 - 8p21.3	1357406	13	Deletion	1.38698
8	19215361	19298010	NM_022071	SH2D4A	8	18571258	19928663	1	8p22 - 8p21.3	1357406	13	Deletion	1.38698
8	19215767	19298010	NM_001174159	SH2D4A	8	18571258	19928663	1	8p22 - 8p21.3	1357406	13	Deletion	1.38698
8	19305952	19504337	NM_001130518	CSGALNACT1	8	18571258	19928663	1	8p22 - 8p21.3	1357406	13	Deletion	1.38698
8	19305952	19584375	NM_018371	CSGALNACT1	8	18571258	19928663	1	8p22 - 8p21.3	1357406	13	Deletion	1.38698
8	19305952	19584542	NR_024040	CSGALNACT1	8	18571258	19928663	1	8p22 - 8p21.3	1357406	13	Deletion	1.38698
8	19719198	19753867	NM_018142	INTS10	8	18571258	19928663	1	8p22 - 8p21.3	1357406	13	Deletion	1.38698
8	19840862	19869051	NM_000237	LPL	8	18571258	19928663	1	8p22 - 8p21.3	1357406	13	Deletion	1.38698
8	21593810	21702293	NM_001165038	GFRA2	8	21442217	22874398	1	8p21.3	1432182	13	Deletion	1.40027
8	21593810	21702293	NM_001165039	GFRA2	8	21442217	22874398	1	8p21.3	1432182	13	Deletion	1.40027
8	21593810	21702293	NM_001495	GFRA2	8	21442217	22874398	1	8p21.3	1432182	13	Deletion	1.40027
8	21822330	21827152	NM_003974	DOK2	8	21442217	22874398	1	8p21.3	1432182	13	Deletion	1.40027
8	21833126	21920043	NM_015024	XPO7	8	21442217	22874398	1	8p21.3	1432182	13	Deletion	1.40027
8	21938300	21950355	NM_182795	NPM2	8	21442217	22874398	1	8p21.3	1432182	13	Deletion	1.40027
8	21956374	21962266	NM_003867	FGF17	8	21442217	22874398	1	8p21.3	1432182	13	Deletion	1.40027
8	21967027	21995983	NM_001114137	EPB49	8	21442217	22874398	1	8p21.3	1432182	13	Deletion	1.40027
8	21968274	21995983	NM_001114136	EPB49	8	21442217	22874398	1	8p21.3	1432182	13	Deletion	1.40027
8	21968274	21995983	NM_001114139	EPB49	8	21442217	22874398	1	8p21.3	1432182	13	Deletion	1.40027
8	21971322	21995983	NM_001114135	EPB49	8	21442217	22874398	1	8p21.3	1432182	13	Deletion	1.40027
8	21972632	21995983	NM_001114138	EPB49	8	21442217	22874398	1	8p21.3	1432182	13	Deletion	1.40027
8	21972632	21995983	NM_001978	EPB49	8	21442217	22874398	1	8p21.3	1432182	13	Deletion	1.40027
8	22002660	22017837	NM_022749	FAM160B2	8	21442217	22874398	1	8p21.3	1432182	13	Deletion	1.40027
8	22020328	22022878	NM_024815	NUDT18	8	21442217	22874398	1	8p21.3	1432182	13	Deletion	1.40027
8	22027877	22044511	NM_005144	HR	8	21442217	22874398	1	8p21.3	1432182	13	Deletion	1.40027
8	22027877	22044511	NM_018411	HR	8	21442217	22874398	1	8p21.3	1432182	13	Deletion	1.40027
8	22051478	22055394	NM_025232	REEP4	8	21442217	22874398	1	8p21.3	1432182	13	Deletion	1.40027
8	22060288	22070290	NM_139278	LGI3	8	21442217	22874398	1	8p21.3	1432182	13	Deletion	1.40027
8	22075129	22077937	NM_001172357	SFTPC	8	21442217	22874398	1	8p21.3	1432182	13	Deletion	1.40027
8	22075129	22077937	NM_001172410	SFTPC	8	21442217	22874398	1	8p21.3	1432182	13	Deletion	1.40027
8	22075129	22077937	NM_003018	SFTPC	8	21442217	22874398	1	8p21.3	1432182	13	Deletion	1.40027
8	22078598	22114942	NM_001199	BMP1	8	21442217	22874398	1	8p21.3	1432182	13	Deletion	1.40027
8	22078598	22125786	NM_006129	BMP1	8	21442217	22874398	1	8p21.3	1432182	13	Deletion	1.40027
8	22078598	22125786	NR_033403	BMP1	8	21442217	22874398	1	8p21.3	1432182	13	Deletion	1.40027
8	22078598	22114942	NR_033404	BMP1	8	21442217	22874398	1	8p21.3	1432182	13	Deletion	1.40027
8	22133161	22145797	NM_001099335	PHYHIP	8	21442217	22874398	1	8p21.3	1432182	13	Deletion	1.40027
8	22133161	22145797	NM_014759	PHYHIP	8	21442217	22874398	1	8p21.3	1432182	13	Deletion	1.40027
8	22158420	22158502	NR_029714	MIR320A	8	21442217	22874398	1	8p21.3	1432182	13	Deletion	1.40027
8	22158564	22164626	NM_001722	POLR3D	8	21442217	22874398	1	8p21.3	1432182	13	Deletion	1.40027
8	22188755	22269530	NM_018068	PIWIL2	8	21442217	22874398	1	8p21.3	1432182	13	Deletion	1.40027
8	22189025	22269530	NM_001135721	PIWIL2	8	21442217	22874398	1	8p21.3	1432182	13	Deletion	1.40027
8	22280707	22336195	NM_001128431	SLC39A14	8	21442217	22874398	1	8p21.3	1432182	13	Deletion	1.40027
8	22280707	22347586	NM_001135154	SLC39A14	8	21442217	22874398	1	8p21.3	1432182	13	Deletion	1.40027
8	22280707	22336195	NM_015359	SLC39A14	8	21442217	22874398	1	8p21.3	1432182	13	Deletion	1.40027
8	22280995	22336195	NM_001135153	SLC39A14	8	21442217	22874398	1	8p21.3	1432182	13	Deletion	1.40027
8	22354541	22454583	NM_005605	PPP3CC	8	21442217	22874398	1	8p21.3	1432182	13	Deletion	1.40027
8	22465196	22488954	NM_005775	SORBS3	8	21442217	22874398	1	8p21.3	1432182	13	Deletion	1.40027
8	22479124	22488954	NM_001018003	SORBS3	8	21442217	22874398	1	8p21.3	1432182	13	Deletion	1.40027
8	22492199	22507756	NM_021630	PDLIM2	8	21442217	22874398	1	8p21.3	1432182	13	Deletion	1.40027
8	22493932	22511484	NM_176871	PDLIM2	8	21442217	22874398	1	8p21.3	1432182	13	Deletion	1.40027
8	22493932	22507756	NM_198042	PDLIM2	8	21442217	22874398	1	8p21.3	1432182	13	Deletion	1.40027
8	22513059	22517608	NM_001013842	C8orf58	8	21442217	22874398	1	8p21.3	1432182	13	Deletion	1.40027
8	22513059	22517608	NM_001198827	C8orf58	8	21442217	22874398	1	8p21.3	1432182	13	Deletion	1.40027
8	22513059	22517608	NM_173686	C8orf58	8	21442217	22874398	1	8p21.3	1432182	13	Deletion	1.40027
8	22518090	22533929	NR_033902	KIAA1967	8	21442217	22874398	1	8p21.3	1432182	13	Deletion	1.40027
8	22518484	22533929	NM_021174	KIAA1967	8	21442217	22874398	1	8p21.3	1432182	13	Deletion	1.40027
8	22533892	22582607	NM_018688	BIN3	8	21442217	22874398	1	8p21.3	1432182	13	Deletion	1.40027
8	22553829	22555668	NR_027715	FLJ14107	8	21442217	22874398	1	8p21.3	1432182	13	Deletion	1.40027
8	22601119	22605848	NM_001199880	EGR3	8	21442217	22874398	1	8p21.3	1432182	13	Deletion	1.40027
8	22601119	22606039	NM_001199881	EGR3	8	21442217	22874398	1	8p21.3	1432182	13	Deletion	1.40027
8	22601119	22606761	NM_004430	EGR3	8	21442217	22874398	1	8p21.3	1432182	13	Deletion	1.40027
8	22626710	22841367	NM_144962	PEBP4	8	21442217	22874398	1	8p21.3	1432182	13	Deletion	1.40027
8	23157095	23175458	NM_152272	CHMP7	8	23174369	23489810	0.0593553	8p21.3 - 8p21.2	315442	13	Deletion	1.40044
8	23201557	23209738	NM_001136108	R3HCC1	8	23174369	23489810	1	8p21.3 - 8p21.2	315442	13	Deletion	1.40044
8	23210355	23317668	NM_002318	LOXL2	8	23174369	23489810	1	8p21.3 - 8p21.2	315442	13	Deletion	1.40044
8	23345517	23371190	NM_001128930	ENTPD4	8	23174369	23489810	1	8p21.3 - 8p21.2	315442	13	Deletion	1.40044
8	23345517	23371082	NM_004901	ENTPD4	8	23174369	23489810	1	8p21.3 - 8p21.2	315442	13	Deletion	1.40044
8	23442308	23486009	NM_016612	SLC25A37	8	23174369	23489810	1	8p21.3 - 8p21.2	315442	13	Deletion	1.40044
18	5279018	5286040	NM_001143823	ZFP161	18	5259909	6885108	1	18p11.31	1625200	12	Deletion	1.31171
18	5279018	5286040	NM_003409	ZFP161	18	5259909	6885108	1	18p11.31	1625200	12	Deletion	1.31171
18	5279018	5285701	NR_026569	ZFP161	18	5259909	6885108	1	18p11.31	1625200	12	Deletion	1.31171
18	5382388	5533987	NM_012307	EPB41L3	18	5259909	6885108	1	18p11.31	1625200	12	Deletion	1.31171
18	5880184	5882104	NM_001080209	TMEM200C	18	5259909	6885108	1	18p11.31	1625200	12	Deletion	1.31171
18	5944705	6404911	NM_173464	L3MBTL4	18	5259909	6885108	1	18p11.31	1625200	12	Deletion	1.31171
18	6364360	6364425	NR_036205	MIR4317	18	5259909	6885108	1	18p11.31	1625200	12	Deletion	1.31171
18	6824432	6905713	NM_001010000	ARHGAP28	18	5259909	6885108	0.7465	18p11.31	1625200	12	Deletion	1.31171
18	6931886	7107814	NM_005559	LAMA1	18	7075806	7677332	0.181943	18p11.31 - 18p11.23	601527	12	Deletion	1.30858
18	7221137	7222043	NM_001105581	LRRC30	18	7075806	7677332	1	18p11.31 - 18p11.23	601527	12	Deletion	1.30858
18	7557314	8396860	NM_001105244	PTPRM	18	7075806	7677332	0.142957	18p11.31 - 18p11.23	601527	12	Deletion	1.30858
18	7557314	8396860	NM_002845	PTPRM	18	7075806	7677332	0.142957	18p11.31 - 18p11.23	601527	12	Deletion	1.30858
18	11679136	11873145	NM_182978	GNAL	18	11170025	11736289	0.294593	18p11.21	566265	12	Deletion	1.31778
18	16783701	16945811	NM_005406	ROCK1	18	15369065	16807421	0.146326	18p11.21 - 18q11.1	1438357	12	Deletion	1.28113
18	20895886	21186213	NM_015461	ZNF521	18	20437299	21534024	1	18q11.2	1096726	12	Deletion	1.19869
18	21850215	21924610	NM_001007559	SS18	18	21534024	22720502	1	18q11.2	1186479	12	Deletion	1.14173
18	21850215	21924610	NM_005637	SS18	18	21534024	22720502	1	18q11.2	1186479	12	Deletion	1.14173
18	21967814	22027318	NM_001025096	PSMA8	18	21534024	22720502	1	18q11.2	1186479	12	Deletion	1.14173
18	21967814	22027318	NM_001025097	PSMA8	18	21534024	22720502	1	18q11.2	1186479	12	Deletion	1.14173
18	21967814	22027318	NM_144662	PSMA8	18	21534024	22720502	1	18q11.2	1186479	12	Deletion	1.14173
18	22060407	22225648	NM_005640	TAF4B	18	21534024	22720502	1	18q11.2	1186479	12	Deletion	1.14173
18	22288872	22383398	NM_001136205	KCTD1	18	21534024	22720502	1	18q11.2	1186479	12	Deletion	1.14173
18	22288872	22382499	NM_001142730	KCTD1	18	21534024	22720502	1	18q11.2	1186479	12	Deletion	1.14173
18	22288872	22474307	NM_198991	KCTD1	18	21534024	22720502	1	18q11.2	1186479	12	Deletion	1.14173
18	22521583	22537601	NR_024259	LOC728606	18	21534024	22720502	1	18q11.2	1186479	12	Deletion	1.14173
18	22686005	22699715	NM_001650	AQP4	18	21534024	22720502	1	18q11.2	1186479	12	Deletion	1.14173
18	22686005	22696574	NM_004028	AQP4	18	21534024	22720502	1	18q11.2	1186479	12	Deletion	1.14173
18	22699270	22769909	NR_026908	C18orf16	18	21534024	22720502	0.30058	18q11.2	1186479	12	Deletion	1.14173
17	8068864	8092139	NM_025099	C17orf68	17	8086066	8144383	0.260955	17p13.1	58318	12	Deletion	1.2419
17	8093321	8114535	NM_012393	PFAS	17	8086066	8144383	1	17p13.1	58318	12	Deletion	1.2419
17	8131807	8138896	NM_201520	SLC25A35	17	8086066	8144383	1	17p13.1	58318	12	Deletion	1.2419
17	8132694	8134135	NM_001177801	RANGRF	17	8086066	8144383	1	17p13.1	58318	12	Deletion	1.2419
17	8132694	8134135	NM_001177802	RANGRF	17	8086066	8144383	1	17p13.1	58318	12	Deletion	1.2419
17	8132694	8134135	NM_016492	RANGRF	17	8086066	8144383	1	17p13.1	58318	12	Deletion	1.2419
17	8154281	8166560	NM_173728	ARHGEF15	17	8144383	8169322	1	17p13.1	24940	12	Deletion	1.26393
17	8154865	8166560	NM_025014	ARHGEF15	17	8144383	8169322	1	17p13.1	24940	12	Deletion	1.26393
17	9094513	9420001	NM_004853	STX8	17	9103276	10229566	0.973077	17p13.1	1126291	12	Deletion	1.30421
17	9094513	9420001	NR_033656	STX8	17	9103276	10229566	0.973077	17p13.1	1126291	12	Deletion	1.30421
17	9420669	9487502	NM_001080556	WDR16	17	9103276	10229566	1	17p13.1	1126291	12	Deletion	1.30421
17	9420669	9487502	NM_145054	WDR16	17	9103276	10229566	1	17p13.1	1126291	12	Deletion	1.30421
17	9489675	9573729	NM_153210	USP43	17	9103276	10229566	1	17p13.1	1126291	12	Deletion	1.30421
17	9615480	9635327	NM_001105571	DHRS7C	17	9103276	10229566	1	17p13.1	1126291	12	Deletion	1.30421
17	9670106	9733748	NM_004246	GLP2R	17	9103276	10229566	1	17p13.1	1126291	12	Deletion	1.30421
17	9741752	9749410	NM_002903	RCVRN	17	9103276	10229566	1	17p13.1	1126291	12	Deletion	1.30421
17	9754651	9870349	NM_001130831	GAS7	17	9103276	10229566	1	17p13.1	1126291	12	Deletion	1.30421
17	9754651	9803492	NM_003644	GAS7	17	9103276	10229566	1	17p13.1	1126291	12	Deletion	1.30421
17	9754651	9880790	NM_201432	GAS7	17	9103276	10229566	1	17p13.1	1126291	12	Deletion	1.30421
17	9754651	10042594	NM_201433	GAS7	17	9103276	10229566	1	17p13.1	1126291	12	Deletion	1.30421
17	10144908	10217048	NM_003802	MYH13	17	9103276	10229566	1	17p13.1	1126291	12	Deletion	1.30421
17	10234367	10265993	NM_002472	MYH8	17	10229566	10505231	1	17p13.1	275666	12	Deletion	1.29428
17	10287333	10313602	NM_017533	MYH4	17	10229566	10505231	1	17p13.1	275666	12	Deletion	1.29428
17	10336349	10362585	NM_005963	MYH1	17	10229566	10505231	1	17p13.1	275666	12	Deletion	1.29428
17	10365190	10393666	NM_001100112	MYH2	17	10229566	10505231	1	17p13.1	275666	12	Deletion	1.29428
17	10365190	10393743	NM_017534	MYH2	17	10229566	10505231	1	17p13.1	275666	12	Deletion	1.29428
17	10472568	10500191	NM_002470	MYH3	17	10229566	10505231	1	17p13.1	275666	12	Deletion	1.29428
17	11085465	11408106	NM_001173461	SHISA6	17	10975069	11479067	1	17p13.1 - 17p12	503999	12	Deletion	1.20681
17	11085465	11408106	NM_001173462	SHISA6	17	10975069	11479067	1	17p13.1 - 17p12	503999	12	Deletion	1.20681
17	11085465	11408106	NM_207386	SHISA6	17	10975069	11479067	1	17p13.1 - 17p12	503999	12	Deletion	1.20681
17	11442473	11813791	NM_001372	DNAH9	17	10975069	11479067	0.0985541	17p13.1 - 17p12	503999	12	Deletion	1.20681
17	11442473	11813791	NM_001372	DNAH9	17	11720933	11851659	0.250079	17p12	130727	12	Deletion	1.28877
17	11726944	11813791	NM_004662	DNAH9	17	11720933	11851659	1	17p12	130727	12	Deletion	1.28877
17	11821487	11841415	NM_144680	ZNF18	17	11720933	11851659	1	17p12	130727	12	Deletion	1.28877
17	12394010	12481230	NR_034144	FLJ34690	17	12179290	13071025	1	17p12	891736	12	Deletion	1.27544
17	12394010	12481230	NR_034145	FLJ34690	17	12179290	13071025	1	17p12	891736	12	Deletion	1.27544
17	12509932	12611377	NM_001146312	MYOCD	17	12179290	13071025	1	17p12	891736	12	Deletion	1.27544
17	12509932	12611377	NM_153604	MYOCD	17	12179290	13071025	1	17p12	891736	12	Deletion	1.27544
17	12564331	12602349	NM_001146313	MYOCD	17	12179290	13071025	1	17p12	891736	12	Deletion	1.27544
17	12633554	12835686	NM_014859	ARHGAP44	17	12179290	13071025	1	17p12	891736	12	Deletion	1.27544
17	12835654	12862107	NM_001165962	ELAC2	17	12179290	13071025	1	17p12	891736	12	Deletion	1.27544
17	12835654	12862107	NM_018127	ELAC2	17	12179290	13071025	1	17p12	891736	12	Deletion	1.27544
17	12835654	12862107	NM_173717	ELAC2	17	12179290	13071025	1	17p12	891736	12	Deletion	1.27544
17	14145231	14190218	NM_006041	HS3ST3B1	17	14157308	14899213	0.731551	17p12	741906	12	Deletion	1.27103
17	14875017	14876000	NR_033371	CDRT7	17	14157308	14899213	1	17p12	741906	12	Deletion	1.27103
17	15073821	15106615	NM_153321	PMP22	17	15014545	15077303	0.106205	17p12	62759	12	Deletion	1.27933
17	15073822	15109370	NM_000304	PMP22	17	15014545	15077303	0.0979493	17p12	62759	12	Deletion	1.27933
17	15073822	15104819	NM_153322	PMP22	17	15014545	15077303	0.11233	17p12	62759	12	Deletion	1.27933
17	15543616	15564826	NM_001130842	ZNF286A	17	15534768	16363715	1	17p12 - 17p11.2	828948	12	Deletion	1.25879
17	15543616	15564826	NM_020652	ZNF286A	17	15534768	16363715	1	17p12 - 17p11.2	828948	12	Deletion	1.25879
17	15576316	15588824	NM_178571	TBC1D26	17	15534768	16363715	1	17p12 - 17p11.2	828948	12	Deletion	1.25879
17	15608742	15609729	NR_033865	CDRT15L1	17	15534768	16363715	1	17p12 - 17p11.2	828948	12	Deletion	1.25879
17	15630889	15633745	NR_002211	MEIS3P1	17	15534768	16363715	1	17p12 - 17p11.2	828948	12	Deletion	1.25879
17	15788956	15819936	NM_000676	ADORA2B	17	15534768	16363715	1	17p12 - 17p11.2	828948	12	Deletion	1.25879
17	15820600	15843732	NM_001042697	ZSWIM7	17	15534768	16363715	1	17p12 - 17p11.2	828948	12	Deletion	1.25879
17	15820600	15843732	NM_001042698	ZSWIM7	17	15534768	16363715	1	17p12 - 17p11.2	828948	12	Deletion	1.25879
17	15843507	15872822	NM_017775	TTC19	17	15534768	16363715	1	17p12 - 17p11.2	828948	12	Deletion	1.25879
17	15874133	16038679	NM_001190440	NCOR1	17	15534768	16363715	1	17p12 - 17p11.2	828948	12	Deletion	1.25879
17	15874133	16059600	NM_006311	NCOR1	17	15534768	16363715	1	17p12 - 17p11.2	828948	12	Deletion	1.25879
17	15935609	16038679	NM_001190438	NCOR1	17	15534768	16363715	1	17p12 - 17p11.2	828948	12	Deletion	1.25879
17	16061234	16170299	NM_004278	PIGL	17	15534768	16363715	1	17p12 - 17p11.2	828948	12	Deletion	1.25879
17	16126053	16126128	NR_031698	MIR1288	17	15534768	16363715	1	17p12 - 17p11.2	828948	12	Deletion	1.25879
17	16186573	16197538	NM_181716	CENPV	17	15534768	16363715	1	17p12 - 17p11.2	828948	12	Deletion	1.25879
17	16225092	16226780	NM_018955	UBB	17	15534768	16363715	1	17p12 - 17p11.2	828948	12	Deletion	1.25879
17	16259581	16281043	NM_016113	TRPV2	17	15534768	16363715	1	17p12 - 17p11.2	828948	12	Deletion	1.25879
17	16283026	16286066	NR_027158	NCRNA00188	17	15534768	16363715	1	17p12 - 17p11.2	828948	12	Deletion	1.25879
17	16283026	16286066	NR_027159	NCRNA00188	17	15534768	16363715	1	17p12 - 17p11.2	828948	12	Deletion	1.25879
17	16283026	16286066	NR_027160	NCRNA00188	17	15534768	16363715	1	17p12 - 17p11.2	828948	12	Deletion	1.25879
17	16283026	16286066	NR_027161	NCRNA00188	17	15534768	16363715	1	17p12 - 17p11.2	828948	12	Deletion	1.25879
17	16283026	16286066	NR_027162	NCRNA00188	17	15534768	16363715	1	17p12 - 17p11.2	828948	12	Deletion	1.25879
17	16283026	16286066	NR_027163	NCRNA00188	17	15534768	16363715	1	17p12 - 17p11.2	828948	12	Deletion	1.25879
17	16283026	16286066	NR_027164	NCRNA00188	17	15534768	16363715	1	17p12 - 17p11.2	828948	12	Deletion	1.25879
17	16283026	16286066	NR_027165	NCRNA00188	17	15534768	16363715	1	17p12 - 17p11.2	828948	12	Deletion	1.25879
17	16283026	16286066	NR_027166	NCRNA00188	17	15534768	16363715	1	17p12 - 17p11.2	828948	12	Deletion	1.25879
17	16283026	16286066	NR_027167	NCRNA00188	17	15534768	16363715	1	17p12 - 17p11.2	828948	12	Deletion	1.25879
17	16283026	16286066	NR_027168	NCRNA00188	17	15534768	16363715	1	17p12 - 17p11.2	828948	12	Deletion	1.25879
17	16283026	16286066	NR_027169	NCRNA00188	17	15534768	16363715	1	17p12 - 17p11.2	828948	12	Deletion	1.25879
17	16283026	16286066	NR_027170	NCRNA00188	17	15534768	16363715	1	17p12 - 17p11.2	828948	12	Deletion	1.25879
17	16283026	16314688	NR_027171	NCRNA00188	17	15534768	16363715	1	17p12 - 17p11.2	828948	12	Deletion	1.25879
17	16283026	16314688	NR_027172	NCRNA00188	17	15534768	16363715	1	17p12 - 17p11.2	828948	12	Deletion	1.25879
17	16283026	16314688	NR_027173	NCRNA00188	17	15534768	16363715	1	17p12 - 17p11.2	828948	12	Deletion	1.25879
17	16283026	16314688	NR_027174	NCRNA00188	17	15534768	16363715	1	17p12 - 17p11.2	828948	12	Deletion	1.25879
17	16283026	16314688	NR_027175	NCRNA00188	17	15534768	16363715	1	17p12 - 17p11.2	828948	12	Deletion	1.25879
17	16283026	16314688	NR_027176	NCRNA00188	17	15534768	16363715	1	17p12 - 17p11.2	828948	12	Deletion	1.25879
17	16283026	16314688	NR_027177	NCRNA00188	17	15534768	16363715	1	17p12 - 17p11.2	828948	12	Deletion	1.25879
17	16283026	16314688	NR_027178	NCRNA00188	17	15534768	16363715	1	17p12 - 17p11.2	828948	12	Deletion	1.25879
17	16283026	16285251	NR_027179	NCRNA00188	17	15534768	16363715	1	17p12 - 17p11.2	828948	12	Deletion	1.25879
17	16283026	16286066	NR_027667	NCRNA00188	17	15534768	16363715	1	17p12 - 17p11.2	828948	12	Deletion	1.25879
17	16283548	16283596	NR_003043	SNORD49B	17	15534768	16363715	1	17p12 - 17p11.2	828948	12	Deletion	1.25879
17	16284075	16284146	NR_002744	SNORD49A	17	15534768	16363715	1	17p12 - 17p11.2	828948	12	Deletion	1.25879
17	16285265	16285338	NR_003054	SNORD65	17	15534768	16363715	1	17p12 - 17p11.2	828948	12	Deletion	1.25879
17	16286053	16336206	NM_001113567	C17orf76	17	15534768	16363715	1	17p12 - 17p11.2	828948	12	Deletion	1.25879
17	16286053	16336206	NM_207387	C17orf76	17	15534768	16363715	1	17p12 - 17p11.2	828948	12	Deletion	1.25879
17	16674522	16676873	NR_029392	KRT16P2	17	16655702	16852784	1	17p11.2	197083	12	Deletion	1.25912
17	16783123	16816128	NM_012452	TNFRSF13B	17	16655702	16852784	1	17p11.2	197083	12	Deletion	1.25912
17	16886832	17029598	NM_015134	MPRIP	17	16852784	17240566	1	17p11.2	387783	12	Deletion	1.27174
17	16886832	17029599	NM_201274	MPRIP	17	16852784	17240566	1	17p11.2	387783	12	Deletion	1.27174
17	17045034	17050372	NM_178836	PLD6	17	16852784	17240566	1	17p11.2	387783	12	Deletion	1.27174
17	17056252	17081228	NM_144997	FLCN	17	16852784	17240566	1	17p11.2	387783	12	Deletion	1.27174
17	17065210	17081228	NM_144606	FLCN	17	16852784	17240566	1	17p11.2	387783	12	Deletion	1.27174
17	17090663	17124738	NM_001199125	COPS3	17	16852784	17240566	1	17p11.2	387783	12	Deletion	1.27174
17	17090663	17125343	NM_003653	COPS3	17	16852784	17240566	1	17p11.2	387783	12	Deletion	1.27174
17	17147405	17191703	NM_020201	NT5M	17	16852784	17240566	1	17p11.2	387783	12	Deletion	1.27174
17	17655388	17681051	NM_001005291	SREBF1	17	17659004	17833044	0.859102	17p11.2	174041	12	Deletion	1.25189
17	17655388	17681051	NM_004176	SREBF1	17	17659004	17833044	0.859102	17p11.2	174041	12	Deletion	1.25189
17	17687547	17816510	NM_001033551	TOM1L2	17	17659004	17833044	1	17p11.2	174041	12	Deletion	1.25189
17	17687547	17816510	NM_001082968	TOM1L2	17	17659004	17833044	1	17p11.2	174041	12	Deletion	1.25189
17	17816852	17860915	NM_001130090	LRRC48	17	17659004	17833044	0.367488	17p11.2	174041	12	Deletion	1.25189
17	17816852	17851868	NM_001130091	LRRC48	17	17659004	17833044	0.462433	17p11.2	174041	12	Deletion	1.25189
17	17816852	17851868	NM_001130092	LRRC48	17	17659004	17833044	0.462433	17p11.2	174041	12	Deletion	1.25189
17	17816852	17860915	NM_031294	LRRC48	17	17659004	17833044	0.367488	17p11.2	174041	12	Deletion	1.25189
17	18027592	18053993	NM_017758	ALKBH5	17	18026324	19608973	1	17p11.2	1582650	12	Deletion	1.26859
17	18069661	18088914	NM_004140	LLGL1	17	18026324	19608973	1	17p11.2	1582650	12	Deletion	1.26859
17	18088878	18102781	NM_002018	FLII	17	18026324	19608973	1	17p11.2	1582650	12	Deletion	1.26859
17	18104573	18109821	NM_001144900	SMCR7	17	18026324	19608973	1	17p11.2	1582650	12	Deletion	1.26859
17	18104573	18109821	NM_139162	SMCR7	17	18026324	19608973	1	17p11.2	1582650	12	Deletion	1.26859
17	18105149	18109821	NM_148886	SMCR7	17	18026324	19608973	1	17p11.2	1582650	12	Deletion	1.26859
17	18117960	18159047	NM_004618	TOP3A	17	18026324	19608973	1	17p11.2	1582650	12	Deletion	1.26859
17	18159319	18172096	NM_144775	SMCR8	17	18026324	19608973	1	17p11.2	1582650	12	Deletion	1.26859
17	18171912	18207582	NM_004169	SHMT1	17	18026324	19608973	1	17p11.2	1582650	12	Deletion	1.26859
17	18171912	18207582	NM_148918	SHMT1	17	18026324	19608973	1	17p11.2	1582650	12	Deletion	1.26859
17	18221804	18233686	NM_001145127	EVPLL	17	18026324	19608973	1	17p11.2	1582650	12	Deletion	1.26859
17	18266220	18269373	NR_001443	LOC339240	17	18026324	19608973	1	17p11.2	1582650	12	Deletion	1.26859
17	18320824	18338985	NM_001040078	LGALS9C	17	18026324	19608973	1	17p11.2	1582650	12	Deletion	1.26859
17	18355301	18365292	NR_003554	LOC220594	17	18026324	19608973	1	17p11.2	1582650	12	Deletion	1.26859
17	18368605	18370886	NR_026809	FAM106A	17	18026324	19608973	1	17p11.2	1582650	12	Deletion	1.26859
17	18381840	18469656	NR_036647	CCDC144B	17	18026324	19608973	1	17p11.2	1582650	12	Deletion	1.26859
17	18479567	18488466	NM_001039397	TBC1D28	17	18026324	19608973	1	17p11.2	1582650	12	Deletion	1.26859
17	18502468	18526298	NM_001145045	ZNF286B	17	18026324	19608973	1	17p11.2	1582650	12	Deletion	1.26859
17	18509961	18517220	NR_026718	FOXO3B	17	18026324	19608973	1	17p11.2	1582650	12	Deletion	1.26859
17	18566127	18580157	NM_001037330	TRIM16L	17	18026324	19608973	1	17p11.2	1582650	12	Deletion	1.26859
17	18588051	18623388	NM_031456	FBXW10	17	18026324	19608973	1	17p11.2	1582650	12	Deletion	1.26859
17	18625307	18650752	NM_016078	FAM18B1	17	18026324	19608973	1	17p11.2	1582650	12	Deletion	1.26859
17	18702217	18775306	NM_002767	PRPSAP2	17	18026324	19608973	1	17p11.2	1582650	12	Deletion	1.26859
17	18796203	18864729	NM_001042450	SLC5A10	17	18026324	19608973	1	17p11.2	1582650	12	Deletion	1.26859
17	18796203	18864729	NM_152351	SLC5A10	17	18026324	19608973	1	17p11.2	1582650	12	Deletion	1.26859
17	18815106	18848786	NM_001039999	FAM83G	17	18026324	19608973	1	17p11.2	1582650	12	Deletion	1.26859
17	18864715	18891062	NM_006613	GRAP	17	18026324	19608973	1	17p11.2	1582650	12	Deletion	1.26859
17	18971507	19002874	NM_001129778	GRAPL	17	18026324	19608973	1	17p11.2	1582650	12	Deletion	1.26859
17	19081283	19180622	NM_001102664	EPN2	17	18026324	19608973	1	17p11.2	1582650	12	Deletion	1.26859
17	19081283	19180622	NM_014964	EPN2	17	18026324	19608973	1	17p11.2	1582650	12	Deletion	1.26859
17	19081283	19180622	NM_148921	EPN2	17	18026324	19608973	1	17p11.2	1582650	12	Deletion	1.26859
17	19187076	19206640	NM_015681	B9D1	17	18026324	19608973	1	17p11.2	1582650	12	Deletion	1.26859
17	19188412	19188481	NR_031591	MIR1180	17	18026324	19608973	1	17p11.2	1582650	12	Deletion	1.26859
17	19221627	19227451	NM_139032	MAPK7	17	18026324	19608973	1	17p11.2	1582650	12	Deletion	1.26859
17	19221627	19227451	NM_139033	MAPK7	17	18026324	19608973	1	17p11.2	1582650	12	Deletion	1.26859
17	19222367	19227451	NM_002749	MAPK7	17	18026324	19608973	1	17p11.2	1582650	12	Deletion	1.26859
17	19222367	19227451	NM_139034	MAPK7	17	18026324	19608973	1	17p11.2	1582650	12	Deletion	1.26859
17	19227348	19231126	NM_001198695	MFAP4	17	18026324	19608973	1	17p11.2	1582650	12	Deletion	1.26859
17	19227348	19231126	NM_002404	MFAP4	17	18026324	19608973	1	17p11.2	1582650	12	Deletion	1.26859
17	19255084	19261182	NM_007148	RNF112	17	18026324	19608973	1	17p11.2	1582650	12	Deletion	1.26859
17	19377759	19422939	NM_018242	SLC47A1	17	18026324	19608973	1	17p11.2	1582650	12	Deletion	1.26859
17	19401465	19401617	NR_003025.1	SNORA59A	17	18026324	19608973	1	17p11.2	1582650	12	Deletion	1.26859
17	19401465	19401617	NR_003022.1	SNORA59B	17	18026324	19608973	1	17p11.2	1582650	12	Deletion	1.26859
17	19492656	19521501	NM_000382	ALDH3A2	17	18026324	19608973	1	17p11.2	1582650	12	Deletion	1.26859
17	19492656	19521497	NM_001031806	ALDH3A2	17	18026324	19608973	1	17p11.2	1582650	12	Deletion	1.26859
17	19522220	19560636	NM_001099646	SLC47A2	17	18026324	19608973	1	17p11.2	1582650	12	Deletion	1.26859
17	19522220	19560636	NM_152908	SLC47A2	17	18026324	19608973	1	17p11.2	1582650	12	Deletion	1.26859
17	19581890	19592339	NM_000691	ALDH3A1	17	18026324	19608973	1	17p11.2	1582650	12	Deletion	1.26859
17	19581890	19589518	NM_001135167	ALDH3A1	17	18026324	19608973	1	17p11.2	1582650	12	Deletion	1.26859
17	19581890	19589365	NM_001135168	ALDH3A1	17	18026324	19608973	1	17p11.2	1582650	12	Deletion	1.26859
17	19930927	20158660	NM_001033553	SPECC1	17	20008596	20472949	0.658949	17p11.2	464354	12	Deletion	1.29146
17	19930927	20081076	NM_152904	SPECC1	17	20008596	20472949	0.482724	17p11.2	464354	12	Deletion	1.29146
17	19999994	20081084	NM_001033554	SPECC1	17	20008596	20472949	0.893922	17p11.2	464354	12	Deletion	1.29146
17	19999994	20158660	NM_001033555	SPECC1	17	20008596	20472949	0.945786	17p11.2	464354	12	Deletion	1.29146
17	20165079	20246097	NR_023380	CCDC144C	17	20008596	20472949	1	17p11.2	464354	12	Deletion	1.29146
17	20293768	20311441	NM_001042685	LGALS9B	17	20008596	20472949	1	17p11.2	464354	12	Deletion	1.29146
17	20345419	20348404	NR_029393	KRT16P3	17	20008596	20472949	1	17p11.2	464354	12	Deletion	1.29146
17	20423629	20424817	NM_001190790	CDRT15L2	17	20008596	20472949	1	17p11.2	464354	12	Deletion	1.29146
8	148345	172319	NR_003572	RPL23AP53	8	166818	1984497	0.229489	8p23.3	1817680	12	Deletion	1.40955
8	172200	187340	NM_173539	ZNF596	8	166818	1984497	1	8p23.3	1817680	12	Deletion	1.40955
8	172384	187340	NM_001042415	ZNF596	8	166818	1984497	1	8p23.3	1817680	12	Deletion	1.40955
8	172384	187340	NM_001042416	ZNF596	8	166818	1984497	1	8p23.3	1817680	12	Deletion	1.40955
8	346808	409876	NM_012173	FBXO25	8	166818	1984497	1	8p23.3	1817680	12	Deletion	1.40955
8	346808	409876	NM_183420	FBXO25	8	166818	1984497	1	8p23.3	1817680	12	Deletion	1.40955
8	346808	409876	NM_183421	FBXO25	8	166818	1984497	1	8p23.3	1817680	12	Deletion	1.40955
8	431646	485332	NM_175075	C8orf42	8	166818	1984497	1	8p23.3	1817680	12	Deletion	1.40955
8	604200	671227	NM_207332	ERICH1	8	166818	1984497	1	8p23.3	1817680	12	Deletion	1.40955
8	1231701	1238235	NR_033895	LOC286083	8	166818	1984497	1	8p23.3	1817680	12	Deletion	1.40955
8	1436976	1644050	NM_004745	DLGAP2	8	166818	1984497	1	8p23.3	1817680	12	Deletion	1.40955
8	1699277	1722144	NM_018941	CLN8	8	166818	1984497	1	8p23.3	1817680	12	Deletion	1.40955
8	1752804	1752881	NR_030326	MIR596	8	166818	1984497	1	8p23.3	1817680	12	Deletion	1.40955
8	1759556	1894215	NM_014629	ARHGEF10	8	166818	1984497	1	8p23.3	1817680	12	Deletion	1.40955
8	1909451	1942517	NM_014867	KBTBD11	8	166818	1984497	1	8p23.3	1817680	12	Deletion	1.40955
8	1980565	2080788	NM_003970	MYOM2	8	166818	1984497	0.0392421	8p23.3	1817680	12	Deletion	1.40955
8	1980565	2080788	NM_003970	MYOM2	8	1984497	2251847	0.960768	8p23.3 - 8p23.2	267351	12	Deletion	1.39798
8	2780282	4839737	NM_033225	CSMD1	8	2342837	3760009	0.475722	8p23.2	1417173	12	Deletion	1.35917
8	2780282	4839737	NM_033225	CSMD1	8	3790170	5780661	0.509634	8p23.2	1990492	12	Deletion	1.35857
8	6251521	6292349	NM_001172574	MCPH1	8	5780661	6920672	1	8p23.2 - 8p23.1	1140012	12	Deletion	1.36799
8	6251521	6292349	NM_001172575	MCPH1	8	5780661	6920672	1	8p23.2 - 8p23.1	1140012	12	Deletion	1.36799
8	6251521	6488549	NM_024596	MCPH1	8	5780661	6920672	1	8p23.2 - 8p23.1	1140012	12	Deletion	1.36799
8	6344581	6408193	NM_001118887	ANGPT2	8	5780661	6920672	1	8p23.2 - 8p23.1	1140012	12	Deletion	1.36799
8	6344581	6408193	NM_001118888	ANGPT2	8	5780661	6920672	1	8p23.2 - 8p23.1	1140012	12	Deletion	1.36799
8	6344581	6408193	NM_001147	ANGPT2	8	5780661	6920672	1	8p23.2 - 8p23.1	1140012	12	Deletion	1.36799
8	6553286	6606430	NM_018361	AGPAT5	8	5780661	6920672	1	8p23.2 - 8p23.1	1140012	12	Deletion	1.36799
8	6653450	6680577	NM_207411	XKR5	8	5780661	6920672	1	8p23.2 - 8p23.1	1140012	12	Deletion	1.36799
8	6715509	6722940	NM_005218	DEFB1	8	5780661	6920672	1	8p23.2 - 8p23.1	1140012	12	Deletion	1.36799
8	6769626	6771009	NM_001926	DEFA6	8	5780661	6920672	1	8p23.2 - 8p23.1	1140012	12	Deletion	1.36799
8	6780755	6783197	NM_001925	DEFA4	8	5780661	6920672	1	8p23.2 - 8p23.1	1140012	12	Deletion	1.36799
8	6813073	6814046	NR_029386	DEFA10P	8	5780661	6920672	1	8p23.2 - 8p23.1	1140012	12	Deletion	1.36799
8	6822581	6825025	NM_004084.2	DEFA1	8	5780661	6920672	1	8p23.2 - 8p23.1	1140012	12	Deletion	1.36799
8	6822581	6825025	NM_001042500	DEFA1B	8	5780661	6920672	1	8p23.2 - 8p23.1	1140012	12	Deletion	1.36799
8	6832110	6834654	NR_036686	DEFT1P	8	5780661	6920672	1	8p23.2 - 8p23.1	1140012	12	Deletion	1.36799
8	6832110	6834654	NR_036687	DEFT1P2	8	5780661	6920672	1	8p23.2 - 8p23.1	1140012	12	Deletion	1.36799
8	6841698	6844135	NM_004084	DEFA1	8	5780661	6920672	1	8p23.2 - 8p23.1	1140012	12	Deletion	1.36799
8	6841698	6844135	NM_001042500.1	DEFA1B	8	5780661	6920672	1	8p23.2 - 8p23.1	1140012	12	Deletion	1.36799
8	6851213	6853757	NR_036686.1	DEFT1P	8	5780661	6920672	1	8p23.2 - 8p23.1	1140012	12	Deletion	1.36799
8	6851213	6853757	NR_036687.1	DEFT1P2	8	5780661	6920672	1	8p23.2 - 8p23.1	1140012	12	Deletion	1.36799
8	6860801	6863234	NM_004084.1	DEFA1	8	5780661	6920672	1	8p23.2 - 8p23.1	1140012	12	Deletion	1.36799
8	6860801	6863234	NM_001042500.2	DEFA1B	8	5780661	6920672	1	8p23.2 - 8p23.1	1140012	12	Deletion	1.36799
8	6860801	6863227	NM_005217	DEFA3	8	5780661	6920672	1	8p23.2 - 8p23.1	1140012	12	Deletion	1.36799
8	6900239	6901670	NM_021010	DEFA5	8	5780661	6920672	1	8p23.2 - 8p23.1	1140012	12	Deletion	1.36799
8	7146543	7200287	NR_027423	FAM66B	8	7183558	8206910	0.311285	8p23.1	1023353	12	Deletion	1.39376
8	7202908	7207901	NM_001164457	ZNF705G	8	7183558	8206910	1	8p23.1	1023353	12	Deletion	1.39376
8	7273826	7275093	NM_018661.1	DEFB103A	8	7183558	8206910	1	8p23.1	1023353	12	Deletion	1.39376
8	7273901	7275281	NM_001081551.1	DEFB103A	8	7183558	8206910	1	8p23.1	1023353	12	Deletion	1.39376
8	7292686	7308603	NM_058200	SPAG11B	8	7183558	8206910	1	8p23.1	1023353	12	Deletion	1.39376
8	7292686	7308603	NM_058202	SPAG11B	8	7183558	8206910	1	8p23.1	1023353	12	Deletion	1.39376
8	7295496	7308603	NM_016512	SPAG11B	8	7183558	8206910	1	8p23.1	1023353	12	Deletion	1.39376
8	7295496	7308603	NM_058201	SPAG11B	8	7183558	8206910	1	8p23.1	1023353	12	Deletion	1.39376
8	7295496	7297298	NM_058206	SPAG11B	8	7183558	8206910	1	8p23.1	1023353	12	Deletion	1.39376
8	7295496	7297298	NM_058207	SPAG11B	8	7183558	8206910	1	8p23.1	1023353	12	Deletion	1.39376
8	7306318	7308603	NM_058203	SPAG11B	8	7183558	8206910	1	8p23.1	1023353	12	Deletion	1.39376
8	7315240	7320015	NM_080389.1	DEFB104A	8	7183558	8206910	1	8p23.1	1023353	12	Deletion	1.39376
8	7315240	7320015	NM_001040702	DEFB104B	8	7183558	8206910	1	8p23.1	1023353	12	Deletion	1.39376
8	7327436	7331320	NM_152251.1	DEFB106A	8	7183558	8206910	1	8p23.1	1023353	12	Deletion	1.39376
8	7327436	7331320	NM_001040704.1	DEFB106B	8	7183558	8206910	1	8p23.1	1023353	12	Deletion	1.39376
8	7332653	7334484	NM_152250.1	DEFB105A	8	7183558	8206910	1	8p23.1	1023353	12	Deletion	1.39376
8	7332653	7334484	NM_001040703	DEFB105B	8	7183558	8206910	1	8p23.1	1023353	12	Deletion	1.39376
8	7340778	7354244	NM_001037668	DEFB107A	8	7183558	8206910	1	8p23.1	1023353	12	Deletion	1.39376
8	7340778	7354244	NM_001040705	DEFB107B	8	7183558	8206910	1	8p23.1	1023353	12	Deletion	1.39376
8	7401070	7404645	NM_001136572	FAM90A7	8	7183558	8206910	1	8p23.1	1023353	12	Deletion	1.39376
8	7408720	7427586	NM_001136572.1	FAM90A7	8	7183558	8206910	1	8p23.1	1023353	12	Deletion	1.39376
8	7610375	7613386	NM_001164456	FAM90A13	8	7183558	8206910	1	8p23.1	1023353	12	Deletion	1.39376
8	7610375	7613386	NM_001164452	FAM90A14	8	7183558	8206910	1	8p23.1	1023353	12	Deletion	1.39376
8	7618023	7621034	NM_001164451	FAM90A18	8	7183558	8206910	1	8p23.1	1023353	12	Deletion	1.39376
8	7618023	7621034	NM_001164449	FAM90A19	8	7183558	8206910	1	8p23.1	1023353	12	Deletion	1.39376
8	7633319	7636329	NM_001164450	FAM90A8	8	7183558	8206910	1	8p23.1	1023353	12	Deletion	1.39376
8	7648614	7651625	NM_001164451.1	FAM90A18	8	7183558	8206910	1	8p23.1	1023353	12	Deletion	1.39376
8	7648614	7651625	NM_001164449.1	FAM90A19	8	7183558	8206910	1	8p23.1	1023353	12	Deletion	1.39376
8	7656262	7659273	NM_001164448	FAM90A9	8	7183558	8206910	1	8p23.1	1023353	12	Deletion	1.39376
8	7663909	7666921	NM_001164447	FAM90A10	8	7183558	8206910	1	8p23.1	1023353	12	Deletion	1.39376
8	7706652	7710649	NM_001037668.1	DEFB107A	8	7183558	8206910	1	8p23.1	1023353	12	Deletion	1.39376
8	7706652	7710649	NM_001040705.1	DEFB107B	8	7183558	8206910	1	8p23.1	1023353	12	Deletion	1.39376
8	7716940	7718771	NM_152250	DEFB105A	8	7183558	8206910	1	8p23.1	1023353	12	Deletion	1.39376
8	7716940	7718771	NM_001040703.1	DEFB105B	8	7183558	8206910	1	8p23.1	1023353	12	Deletion	1.39376
8	7720104	7723986	NM_152251	DEFB106A	8	7183558	8206910	1	8p23.1	1023353	12	Deletion	1.39376
8	7720104	7723986	NM_001040704	DEFB106B	8	7183558	8206910	1	8p23.1	1023353	12	Deletion	1.39376
8	7731403	7736175	NM_080389	DEFB104A	8	7183558	8206910	1	8p23.1	1023353	12	Deletion	1.39376
8	7731403	7736175	NM_001040702.1	DEFB104B	8	7183558	8206910	1	8p23.1	1023353	12	Deletion	1.39376
8	7742812	7758730	NM_001081552	SPAG11A	8	7183558	8206910	1	8p23.1	1023353	12	Deletion	1.39376
8	7742812	7745097	NM_058203.1	SPAG11B	8	7183558	8206910	1	8p23.1	1023353	12	Deletion	1.39376
8	7776136	7777516	NM_001081551	DEFB103A	8	7183558	8206910	1	8p23.1	1023353	12	Deletion	1.39376
8	7776324	7777591	NM_018661	DEFB103A	8	7183558	8206910	1	8p23.1	1023353	12	Deletion	1.39376
8	7789609	7791648	NM_004942	DEFB4A	8	7183558	8206910	1	8p23.1	1023353	12	Deletion	1.39376
8	7821269	7847346	NM_001193630	LOC100132396	8	7183558	8206910	1	8p23.1	1023353	12	Deletion	1.39376
8	7849945	7903688	NR_027424	FAM66E	8	7183558	8206910	1	8p23.1	1023353	12	Deletion	1.39376
8	7885347	7892454	NR_003668.1	DEFB109P1B	8	7183558	8206910	1	8p23.1	1023353	12	Deletion	1.39376
8	7983873	7984022	NR_031689	MIR548I3	8	7183558	8206910	1	8p23.1	1023353	12	Deletion	1.39376
8	8123502	8139798	NR_024361	FLJ10661	8	7183558	8206910	1	8p23.1	1023353	12	Deletion	1.39376
8	8123502	8133859	NR_024362	FLJ10661	8	7183558	8206910	1	8p23.1	1023353	12	Deletion	1.39376
8	8123502	8134963	NR_024363	FLJ10661	8	7183558	8206910	1	8p23.1	1023353	12	Deletion	1.39376
8	8597076	8599028	NM_194284	CLDN23	8	8377491	8824244	1	8p23.1	446754	12	Deletion	1.39395
8	8679409	8788542	NM_004225	MFHAS1	8	8377491	8824244	1	8p23.1	446754	12	Deletion	1.39395
8	11888898	11891170	NM_001033019	DEFB134	8	11890206	13218431	0.424549	8p23.1 - 8p22	1328226	12	Deletion	1.40106
8	11959307	11966666	NM_001037804	DEFB130	8	11890206	13218431	1	8p23.1 - 8p22	1328226	12	Deletion	1.40106
8	11959307	11966666	NM_001195257	LOC100133267	8	11890206	13218431	1	8p23.1 - 8p22	1328226	12	Deletion	1.40106
8	11984256	12010435	NM_001039615	ZNF705D	8	11890206	13218431	1	8p23.1 - 8p22	1328226	12	Deletion	1.40106
8	12010700	12046108	NR_027425	FAM66D	8	11890206	13218431	1	8p23.1 - 8p22	1328226	12	Deletion	1.40106
8	12022776	12024214	NR_003275	LOC392196	8	11890206	13218431	1	8p23.1 - 8p22	1328226	12	Deletion	1.40106
8	12032086	12033679	NM_201402	USP17L2	8	11890206	13218431	1	8p23.1 - 8p22	1328226	12	Deletion	1.40106
8	12077022	12089034	NM_001083537	FAM86B1	8	11890206	13218431	1	8p23.1 - 8p22	1328226	12	Deletion	1.40106
8	12077022	12089034	NR_003494	FAM86B1	8	11890206	13218431	1	8p23.1 - 8p22	1328226	12	Deletion	1.40106
8	12212843	12220197	NM_001037804.1	DEFB130	8	11890206	13218431	1	8p23.1 - 8p22	1328226	12	Deletion	1.40106
8	12212843	12220197	NM_001195257.1	LOC100133267	8	11890206	13218431	1	8p23.1 - 8p22	1328226	12	Deletion	1.40106
8	12263899	12312882	NR_026789	FAM66A	8	11890206	13218431	1	8p23.1 - 8p22	1328226	12	Deletion	1.40106
8	12295164	12302246	NR_024044	DEFB109P1	8	11890206	13218431	1	8p23.1 - 8p22	1328226	12	Deletion	1.40106
8	12316401	12321467	NR_036463	FAM90A25P	8	11890206	13218431	1	8p23.1 - 8p22	1328226	12	Deletion	1.40106
8	12327495	12338224	NM_001137610	FAM86B2	8	11890206	13218431	1	8p23.1 - 8p22	1328226	12	Deletion	1.40106
8	12623777	12657364	NM_152271	LONRF1	8	11890206	13218431	1	8p23.1 - 8p22	1328226	12	Deletion	1.40106
8	12629112	12629185	NR_037492	MIR3926-1	8	11890206	13218431	1	8p23.1 - 8p22	1328226	12	Deletion	1.40106
8	12629117	12629180	NR_037495	MIR3926-2	8	11890206	13218431	1	8p23.1 - 8p22	1328226	12	Deletion	1.40106
8	12667942	12713282	NR_015383	LOC340357	8	11890206	13218431	1	8p23.1 - 8p22	1328226	12	Deletion	1.40106
8	12847554	12931656	NM_020844	C8orf79	8	11890206	13218431	1	8p23.1 - 8p22	1328226	12	Deletion	1.40106
8	12914144	12931656	NM_001099677	C8orf79	8	11890206	13218431	1	8p23.1 - 8p22	1328226	12	Deletion	1.40106
8	12985243	13018125	NM_001164271	DLC1	8	11890206	13218431	1	8p23.1 - 8p22	1328226	12	Deletion	1.40106
8	12985243	13035181	NM_006094	DLC1	8	11890206	13218431	1	8p23.1 - 8p22	1328226	12	Deletion	1.40106
8	12985243	13416801	NM_182643	DLC1	8	11890206	13218431	0.540341	8p23.1 - 8p22	1328226	12	Deletion	1.40106
8	12985243	13416801	NM_182643	DLC1	8	13218431	13296429	0.180738	8p22	77999	12	Deletion	1.37722
8	13206487	13416801	NM_024767	DLC1	8	11890206	13218431	0.0567958	8p23.1 - 8p22	1328226	12	Deletion	1.40106
8	13206487	13416801	NM_024767	DLC1	8	13218431	13296429	0.370868	8p22	77999	12	Deletion	1.37722
8	17058207	17124613	NM_016353	ZDHHC2	8	17042033	17217506	1	8p22	175474	12	Deletion	1.38486
8	17131111	17148759	NM_013354	CNOT7	8	17042033	17217506	1	8p22	175474	12	Deletion	1.38486
8	17133393	17148759	NM_054026	CNOT7	8	17042033	17217506	1	8p22	175474	12	Deletion	1.38486
8	17148772	17199905	NM_001145152	VPS37A	8	17042033	17217506	1	8p22	175474	12	Deletion	1.38486
8	17148772	17199905	NM_152415	VPS37A	8	17042033	17217506	1	8p22	175474	12	Deletion	1.38486
8	17198677	17315412	NM_004686	MTMR7	8	17042033	17217506	0.161304	8p22	175474	12	Deletion	1.38486
8	17198677	17315412	NM_004686	MTMR7	8	17217506	18571258	0.838704	8p22	1353753	12	Deletion	1.40475
8	17398975	17472353	NM_001008539	SLC7A2	8	17217506	18571258	1	8p22	1353753	12	Deletion	1.40475
8	17440665	17472353	NM_001164771	SLC7A2	8	17217506	18571258	1	8p22	1353753	12	Deletion	1.40475
8	17440665	17472353	NM_003046	SLC7A2	8	17217506	18571258	1	8p22	1353753	12	Deletion	1.40475
8	17478215	17544923	NM_006207	PDGFRL	8	17217506	18571258	1	8p22	1353753	12	Deletion	1.40475
8	17545583	17702707	NM_001001924	MTUS1	8	17217506	18571258	1	8p22	1353753	12	Deletion	1.40475
8	17545583	17702707	NM_001001925	MTUS1	8	17217506	18571258	1	8p22	1353753	12	Deletion	1.40475
8	17545583	17624011	NM_001001931	MTUS1	8	17217506	18571258	1	8p22	1353753	12	Deletion	1.40475
8	17545583	17624365	NM_001166393	MTUS1	8	17217506	18571258	1	8p22	1353753	12	Deletion	1.40475
8	17545583	17599527	NM_020749	MTUS1	8	17217506	18571258	1	8p22	1353753	12	Deletion	1.40475
8	17766180	17797328	NM_004467	FGL1	8	17217506	18571258	1	8p22	1353753	12	Deletion	1.40475
8	17766180	17797194	NM_147203	FGL1	8	17217506	18571258	1	8p22	1353753	12	Deletion	1.40475
8	17766180	17797328	NM_201552	FGL1	8	17217506	18571258	1	8p22	1353753	12	Deletion	1.40475
8	17766180	17797194	NM_201553	FGL1	8	17217506	18571258	1	8p22	1353753	12	Deletion	1.40475
8	17824646	17931738	NM_006197	PCM1	8	17217506	18571258	1	8p22	1353753	12	Deletion	1.40475
8	17958205	17986788	NM_001127505	ASAH1	8	17217506	18571258	1	8p22	1353753	12	Deletion	1.40475
8	17958205	17986788	NM_004315	ASAH1	8	17217506	18571258	1	8p22	1353753	12	Deletion	1.40475
8	17958205	17986160	NM_177924	ASAH1	8	17217506	18571258	1	8p22	1353753	12	Deletion	1.40475
8	18072251	18125479	NM_001160179	NAT1	8	17217506	18571258	1	8p22	1353753	12	Deletion	1.40475
8	18111898	18125479	NM_000662	NAT1	8	17217506	18571258	1	8p22	1353753	12	Deletion	1.40475
8	18111898	18125479	NM_001160170	NAT1	8	17217506	18571258	1	8p22	1353753	12	Deletion	1.40475
8	18111898	18125479	NM_001160171	NAT1	8	17217506	18571258	1	8p22	1353753	12	Deletion	1.40475
8	18111898	18125479	NM_001160172	NAT1	8	17217506	18571258	1	8p22	1353753	12	Deletion	1.40475
8	18111898	18125479	NM_001160173	NAT1	8	17217506	18571258	1	8p22	1353753	12	Deletion	1.40475
8	18111898	18125479	NM_001160175	NAT1	8	17217506	18571258	1	8p22	1353753	12	Deletion	1.40475
8	18111898	18125479	NM_001160176	NAT1	8	17217506	18571258	1	8p22	1353753	12	Deletion	1.40475
8	18123457	18125479	NM_001160174	NAT1	8	17217506	18571258	1	8p22	1353753	12	Deletion	1.40475
8	18293035	18303004	NM_000015	NAT2	8	17217506	18571258	1	8p22	1353753	12	Deletion	1.40475
8	18429093	18915477	NM_015310	PSD3	8	17217506	18571258	0.292291	8p22	1353753	12	Deletion	1.40475
8	18429093	18710686	NM_206909	PSD3	8	17217506	18571258	0.504862	8p22	1353753	12	Deletion	1.40475
8	20046646	20084998	NM_001135691	SLC18A1	8	19928663	21442217	1	8p21.3	1513555	12	Deletion	1.40475
8	20046646	20084998	NM_001142324	SLC18A1	8	19928663	21442217	1	8p21.3	1513555	12	Deletion	1.40475
8	20046646	20084998	NM_001142325	SLC18A1	8	19928663	21442217	1	8p21.3	1513555	12	Deletion	1.40475
8	20046646	20084998	NM_003053	SLC18A1	8	19928663	21442217	1	8p21.3	1513555	12	Deletion	1.40475
8	20098984	20123488	NM_001693	ATP6V1B2	8	19928663	21442217	1	8p21.3	1513555	12	Deletion	1.40475
8	20147956	20157084	NM_021020	LZTS1	8	19928663	21442217	1	8p21.3	1513555	12	Deletion	1.40475
8	20875777	20896911	NR_033894	LOC286114	8	19928663	21442217	1	8p21.3	1513555	12	Deletion	1.40475
8	22900875	22933656	NM_001160036	RHOBTB2	8	22874398	23174369	1	8p21.3	299972	12	Deletion	1.39381
8	22909306	22933656	NM_001160037	RHOBTB2	8	22874398	23174369	1	8p21.3	299972	12	Deletion	1.39381
8	22913037	22933656	NM_015178	RHOBTB2	8	22874398	23174369	1	8p21.3	299972	12	Deletion	1.39381
8	22933593	22982646	NM_003842	TNFRSF10B	8	22874398	23174369	1	8p21.3	299972	12	Deletion	1.39381
8	22933593	22982646	NM_147187	TNFRSF10B	8	22874398	23174369	1	8p21.3	299972	12	Deletion	1.39381
8	22933593	22982646	NR_027140	TNFRSF10B	8	22874398	23174369	1	8p21.3	299972	12	Deletion	1.39381
8	23016272	23030896	NM_003841	TNFRSF10C	8	22874398	23174369	1	8p21.3	299972	12	Deletion	1.39381
8	23049049	23077486	NM_003840	TNFRSF10D	8	22874398	23174369	1	8p21.3	299972	12	Deletion	1.39381
8	23104915	23138626	NM_003844	TNFRSF10A	8	22874398	23174369	1	8p21.3	299972	12	Deletion	1.39381
8	23138679	23144385	NR_033928	LOC389641	8	22874398	23174369	1	8p21.3	299972	12	Deletion	1.39381
8	23157095	23175458	NM_152272	CHMP7	8	22874398	23174369	0.940699	8p21.3	299972	12	Deletion	1.39381
8	23592151	23596396	NM_006167	NKX3-1	8	23489810	24381586	1	8p21.2	891777	12	Deletion	1.40493
8	23615909	23619868	NM_001136271	NKX2-6	8	23489810	24381586	1	8p21.2	891777	12	Deletion	1.40493
8	23755379	23768266	NM_003155	STC1	8	23489810	24381586	1	8p21.2	891777	12	Deletion	1.40493
8	24207525	24268672	NM_014265	ADAM28	8	23489810	24381586	1	8p21.2	891777	12	Deletion	1.40493
8	24207525	24249558	NM_021777	ADAM28	8	23489810	24381586	1	8p21.2	891777	12	Deletion	1.40493
8	24297743	24319472	NM_001145271	ADAMDEC1	8	23489810	24381586	1	8p21.2	891777	12	Deletion	1.40493
8	24297743	24319472	NM_001145272	ADAMDEC1	8	23489810	24381586	1	8p21.2	891777	12	Deletion	1.40493
8	24297743	24319472	NM_014479	ADAMDEC1	8	23489810	24381586	1	8p21.2	891777	12	Deletion	1.40493
8	24354454	24422166	NM_003817	ADAM7	8	23489810	24381586	0.400706	8p21.2	891777	12	Deletion	1.40493
8	27149731	27171821	NM_030795	STMN4	8	27142832	28596881	1	8p21.2 - 8p21.1	1454050	12	Deletion	1.42677
8	27198321	27224752	NM_171982	TRIM35	8	27142832	28596881	1	8p21.2 - 8p21.1	1454050	12	Deletion	1.42677
8	27224916	27372821	NM_004103	PTK2B	8	27142832	28596881	1	8p21.2 - 8p21.1	1454050	12	Deletion	1.42677
8	27224916	27372821	NM_173174	PTK2B	8	27142832	28596881	1	8p21.2 - 8p21.1	1454050	12	Deletion	1.42677
8	27238971	27372821	NM_173176	PTK2B	8	27142832	28596881	1	8p21.2 - 8p21.1	1454050	12	Deletion	1.42677
8	27238998	27372821	NM_173175	PTK2B	8	27142832	28596881	1	8p21.2 - 8p21.1	1454050	12	Deletion	1.42677
8	27373195	27392731	NM_000742	CHRNA2	8	27142832	28596881	1	8p21.2 - 8p21.1	1454050	12	Deletion	1.42677
8	27404562	27458404	NM_001979	EPHX2	8	27142832	28596881	1	8p21.2 - 8p21.1	1454050	12	Deletion	1.42677
8	27510368	27525186	NM_001171138	CLU	8	27142832	28596881	1	8p21.2 - 8p21.1	1454050	12	Deletion	1.42677
8	27510368	27528245	NM_001831	CLU	8	27142832	28596881	1	8p21.2 - 8p21.1	1454050	12	Deletion	1.42677
8	27510368	27524856	NM_203339	CLU	8	27142832	28596881	1	8p21.2 - 8p21.1	1454050	12	Deletion	1.42677
8	27547496	27586457	NM_016240	SCARA3	8	27142832	28596881	1	8p21.2 - 8p21.1	1454050	12	Deletion	1.42677
8	27547496	27590206	NM_182826	SCARA3	8	27142832	28596881	1	8p21.2 - 8p21.1	1454050	12	Deletion	1.42677
8	27615109	27615204	NR_037418	MIR3622B	8	27142832	28596881	1	8p21.2 - 8p21.1	1454050	12	Deletion	1.42677
8	27615113	27615196	NR_037417	MIR3622A	8	27142832	28596881	1	8p21.2 - 8p21.1	1454050	12	Deletion	1.42677
8	27646752	27686090	NM_018246	CCDC25	8	27142832	28596881	1	8p21.2 - 8p21.1	1454050	12	Deletion	1.42677
8	27687977	27718344	NM_001017420	ESCO2	8	27142832	28596881	1	8p21.2 - 8p21.1	1454050	12	Deletion	1.42677
8	27723057	27751269	NM_018492	PBK	8	27142832	28596881	1	8p21.2 - 8p21.1	1454050	12	Deletion	1.42677
8	27783318	27906289	NM_173833	SCARA5	8	27142832	28596881	1	8p21.2 - 8p21.1	1454050	12	Deletion	1.42677
8	27799475	27799553	NR_036249	MIR4287	8	27142832	28596881	1	8p21.2 - 8p21.1	1454050	12	Deletion	1.42677
8	27935400	27997308	NM_001010906	C8orf80	8	27142832	28596881	1	8p21.2 - 8p21.1	1454050	12	Deletion	1.42677
8	28006503	28104589	NM_018091	ELP3	8	27142832	28596881	1	8p21.2 - 8p21.1	1454050	12	Deletion	1.42677
8	28230568	28256788	NM_006228	PNOC	8	27142832	28596881	1	8p21.2 - 8p21.1	1454050	12	Deletion	1.42677
8	28259021	28299897	NM_018660	ZNF395	8	27142832	28596881	1	8p21.2 - 8p21.1	1454050	12	Deletion	1.42677
8	28341848	28403704	NM_172366	FBXO16	8	27142832	28596881	1	8p21.2 - 8p21.1	1454050	12	Deletion	1.42677
8	28407641	28487705	NM_017412	FZD3	8	27142832	28596881	1	8p21.2 - 8p21.1	1454050	12	Deletion	1.42677
8	28407641	28487705	NM_145866	FZD3	8	27142832	28596881	1	8p21.2 - 8p21.1	1454050	12	Deletion	1.42677
8	28418552	28418619	NR_036250	MIR4288	8	27142832	28596881	1	8p21.2 - 8p21.1	1454050	12	Deletion	1.42677
18	2527524	2561490	NM_022840	METTL4	18	2506480	3462638	1	18p11.32 - 18p11.31	956159	11	Deletion	1.3078
18	2561510	2606635	NM_006101	NDC80	18	2506480	3462638	1	18p11.32 - 18p11.31	956159	11	Deletion	1.3078
18	2642722	2643232	NR_033754	LOC645158	18	2506480	3462638	1	18p11.32 - 18p11.31	956159	11	Deletion	1.3078
18	2645886	2795016	NM_015295	SMCHD1	18	2506480	3462638	1	18p11.32 - 18p11.31	956159	11	Deletion	1.3078
18	2837028	2904091	NM_032048	EMILIN2	18	2506480	3462638	1	18p11.32 - 18p11.31	956159	11	Deletion	1.3078
18	2906992	3001946	NM_014646	LPIN2	18	2506480	3462638	1	18p11.32 - 18p11.31	956159	11	Deletion	1.3078
18	2933213	2936622	NR_026659	LOC727896	18	2506480	3462638	1	18p11.32 - 18p11.31	956159	11	Deletion	1.3078
18	3056805	3210107	NM_003803	MYOM1	18	2506480	3462638	1	18p11.32 - 18p11.31	956159	11	Deletion	1.3078
18	3056805	3210107	NM_019856	MYOM1	18	2506480	3462638	1	18p11.32 - 18p11.31	956159	11	Deletion	1.3078
18	3237528	3246235	NM_006471	MYL12A	18	2506480	3462638	1	18p11.32 - 18p11.31	956159	11	Deletion	1.3078
18	3252111	3268283	NM_033546	MYL12B	18	2506480	3462638	1	18p11.32 - 18p11.31	956159	11	Deletion	1.3078
18	3252611	3268283	NM_001144944	MYL12B	18	2506480	3462638	1	18p11.32 - 18p11.31	956159	11	Deletion	1.3078
18	3252717	3268283	NM_001144945	MYL12B	18	2506480	3462638	1	18p11.32 - 18p11.31	956159	11	Deletion	1.3078
18	3402072	3448407	NM_174886	TGIF1	18	2506480	3462638	1	18p11.32 - 18p11.31	956159	11	Deletion	1.3078
18	3437608	3448407	NM_173207	TGIF1	18	2506480	3462638	1	18p11.32 - 18p11.31	956159	11	Deletion	1.3078
18	3439973	3448407	NM_173209	TGIF1	18	2506480	3462638	1	18p11.32 - 18p11.31	956159	11	Deletion	1.3078
18	3440031	3448407	NM_173208	TGIF1	18	2506480	3462638	1	18p11.32 - 18p11.31	956159	11	Deletion	1.3078
18	3440172	3448407	NM_003244	TGIF1	18	2506480	3462638	1	18p11.32 - 18p11.31	956159	11	Deletion	1.3078
18	3441591	3448407	NM_170695	TGIF1	18	2506480	3462638	1	18p11.32 - 18p11.31	956159	11	Deletion	1.3078
18	3441591	3448407	NM_173210	TGIF1	18	2506480	3462638	1	18p11.32 - 18p11.31	956159	11	Deletion	1.3078
18	3443772	3448407	NM_173211	TGIF1	18	2506480	3462638	1	18p11.32 - 18p11.31	956159	11	Deletion	1.3078
18	3488837	3835297	NM_001003809	DLGAP1	18	3645940	3838213	0.546549	18p11.31	192274	11	Deletion	1.3251
18	3488837	3870136	NM_004746	DLGAP1	18	3645940	3838213	0.504259	18p11.31	192274	11	Deletion	1.3251
18	4254602	4286001	NR_036489	LOC284215	18	4195970	4729161	1	18p11.31	533192	11	Deletion	1.33293
18	5133672	5187256	NM_001145194	LOC642597	18	4729161	5259909	1	18p11.31	530749	11	Deletion	1.3062
18	5226723	5228029	NR_026849	C18orf18	18	4729161	5259909	1	18p11.31	530749	11	Deletion	1.3062
18	5228099	5236506	NR_015389	LOC339290	18	4729161	5259909	1	18p11.31	530749	11	Deletion	1.3062
18	6824432	6905713	NM_001010000	ARHGAP28	18	6885108	7075806	0.253512	18p11.31	190699	11	Deletion	1.30537
18	6915473	6919869	NR_034100	LOC400643	18	6885108	7075806	1	18p11.31	190699	11	Deletion	1.30537
18	6931886	7107814	NM_005559	LAMA1	18	6885108	7075806	0.818063	18p11.31	190699	11	Deletion	1.30537
18	7557314	8396860	NM_001105244	PTPRM	18	7677332	8836123	0.857044	18p11.23 - 18p11.22	1158792	11	Deletion	1.30537
18	7557314	8396860	NM_002845	PTPRM	18	7677332	8836123	0.857044	18p11.23 - 18p11.22	1158792	11	Deletion	1.30537
18	8350818	8357033	NR_024419	LOC100192426	18	7677332	8836123	1	18p11.23 - 18p11.22	1158792	11	Deletion	1.30537
18	8599443	8629381	NM_001025300	RAB12	18	7677332	8836123	1	18p11.23 - 18p11.22	1158792	11	Deletion	1.30537
18	8707369	8822776	NM_015210	KIAA0802	18	7677332	8836123	1	18p11.23 - 18p11.22	1158792	11	Deletion	1.30537
18	9465530	9528107	NM_006788	RALBP1	18	9423338	11170025	1	18p11.22 - 18p11.21	1746688	11	Deletion	1.30559
18	9536792	9604601	NM_001042388	PPP4R1	18	9423338	11170025	1	18p11.22 - 18p11.21	1746688	11	Deletion	1.30559
18	9536792	9604601	NM_005134	PPP4R1	18	9423338	11170025	1	18p11.22 - 18p11.21	1746688	11	Deletion	1.30559
18	9698228	9852554	NM_006868	RAB31	18	9423338	11170025	1	18p11.22 - 18p11.21	1746688	11	Deletion	1.30559
18	9875723	9878157	NM_001098529	TXNDC2	18	9423338	11170025	1	18p11.22 - 18p11.21	1746688	11	Deletion	1.30559
18	9875723	9878157	NM_032243	TXNDC2	18	9423338	11170025	1	18p11.22 - 18p11.21	1746688	11	Deletion	1.30559
18	9903955	9950019	NM_003574	VAPA	18	9423338	11170025	1	18p11.22 - 18p11.21	1746688	11	Deletion	1.30559
18	9903955	9950019	NM_194434	VAPA	18	9423338	11170025	1	18p11.22 - 18p11.21	1746688	11	Deletion	1.30559
18	10444625	10478699	NM_153000	APCDD1	18	9423338	11170025	1	18p11.22 - 18p11.21	1746688	11	Deletion	1.30559
18	10515873	10542767	NM_003826	NAPG	18	9423338	11170025	1	18p11.22 - 18p11.21	1746688	11	Deletion	1.30559
18	10660244	11138762	NM_022068	FAM38B	18	9423338	11170025	1	18p11.22 - 18p11.21	1746688	11	Deletion	1.30559
18	11679136	11873145	NM_182978	GNAL	18	11736289	12185204	0.705412	18p11.21	448916	11	Deletion	1.30559
18	11741562	11873145	NM_001142339	GNAL	18	11736289	12185204	1	18p11.21	448916	11	Deletion	1.30559
18	11741562	11873145	NM_002071	GNAL	18	11736289	12185204	1	18p11.21	448916	11	Deletion	1.30559
18	11841389	11844449	NM_020412	CHMP1B	18	11736289	12185204	1	18p11.21	448916	11	Deletion	1.30559
18	11873472	11898642	NM_023075	MPPE1	18	11736289	12185204	1	18p11.21	448916	11	Deletion	1.30559
18	11971455	12020877	NM_014214	IMPA2	18	11736289	12185204	1	18p11.21	448916	11	Deletion	1.30559
18	15303555	15315919	NR_027417	LOC644669	18	15179023	15369065	1	18p11.21	190043	11	Deletion	1.27663
18	16783701	16945811	NM_005406	ROCK1	18	16807421	16818473	0.0681817	18q11.1	11053	11	Deletion	1.29132
18	19826735	19969573	NM_153211	TTC39C	18	19849826	20379336	0.838342	18q11.2	529511	11	Deletion	1.23479
18	19848382	19969573	NM_001135993	TTC39C	18	19849826	20379336	0.988085	18q11.2	529511	11	Deletion	1.23479
18	19848382	19854251	NR_024232	TTC39C	18	19849826	20379336	0.754003	18q11.2	529511	11	Deletion	1.23479
18	19972953	19995563	NM_012189	CABYR	18	19849826	20379336	1	18q11.2	529511	11	Deletion	1.23479
18	19972953	19995563	NM_138643	CABYR	18	19849826	20379336	1	18q11.2	529511	11	Deletion	1.23479
18	19972953	19995563	NM_153768	CABYR	18	19849826	20379336	1	18q11.2	529511	11	Deletion	1.23479
18	19972953	19995563	NM_153769	CABYR	18	19849826	20379336	1	18q11.2	529511	11	Deletion	1.23479
18	19972953	19995563	NM_153770	CABYR	18	19849826	20379336	1	18q11.2	529511	11	Deletion	1.23479
18	19973446	19995563	NM_138644	CABYR	18	19849826	20379336	1	18q11.2	529511	11	Deletion	1.23479
18	19996009	20106195	NM_018030	OSBPL1A	18	19849826	20379336	1	18q11.2	529511	11	Deletion	1.23479
18	19996009	20231789	NM_080597	OSBPL1A	18	19849826	20379336	1	18q11.2	529511	11	Deletion	1.23479
18	20155648	20155698	NR_031724	MIR320C2	18	19849826	20379336	1	18q11.2	529511	11	Deletion	1.23479
18	20260607	20287493	NM_018439	IMPACT	18	19849826	20379336	1	18q11.2	529511	11	Deletion	1.23479
18	20294591	20313920	NM_001143828	HRH4	18	19849826	20379336	1	18q11.2	529511	11	Deletion	1.23479
18	20294591	20313920	NM_001160166	HRH4	18	19849826	20379336	1	18q11.2	529511	11	Deletion	1.23479
18	20294591	20313920	NM_021624	HRH4	18	19849826	20379336	1	18q11.2	529511	11	Deletion	1.23479
17	2646482	2887786	NM_001100398	RAP1GAP2	17	2816479	2891933	0.29551	17p13.3	75455	11	Deletion	1.26547
17	2646482	2887786	NM_015085	RAP1GAP2	17	2816479	2891933	0.29551	17p13.3	75455	11	Deletion	1.26547
17	3363236	3408040	NM_145068	TRPV3	17	3352110	3486018	1	17p13.3	133909	11	Deletion	1.21299
17	3415490	3447086	NM_018727	TRPV1	17	3352110	3486018	1	17p13.3	133909	11	Deletion	1.21299
17	3415490	3459455	NM_080704	TRPV1	17	3352110	3486018	1	17p13.3	133909	11	Deletion	1.21299
17	3415490	3445875	NM_080705	TRPV1	17	3352110	3486018	1	17p13.3	133909	11	Deletion	1.21299
17	3415490	3442921	NM_080706	TRPV1	17	3352110	3486018	1	17p13.3	133909	11	Deletion	1.21299
17	3458305	3486366	NM_013276	SHPK	17	3352110	3486018	0.987599	17p13.3	133909	11	Deletion	1.21299
17	3458305	3486366	NM_013276	SHPK	17	3486018	4483633	0.0124367	17p13.3 - 17p13.2	997616	11	Deletion	1.23072
17	3486511	3513147	NM_001031681	CTNS	17	3486018	4483633	1	17p13.3 - 17p13.2	997616	11	Deletion	1.23072
17	3486511	3513147	NM_004937	CTNS	17	3486018	4483633	1	17p13.3 - 17p13.2	997616	11	Deletion	1.23072
17	3512938	3518723	NM_014604	TAX1BP3	17	3486018	4483633	1	17p13.3 - 17p13.2	997616	11	Deletion	1.23072
17	3518839	3519712	NM_001014764	TMEM93	17	3486018	4483633	1	17p13.3 - 17p13.2	997616	11	Deletion	1.23072
17	3518839	3519712	NM_031298	TMEM93	17	3486018	4483633	1	17p13.3 - 17p13.2	997616	11	Deletion	1.23072
17	3523271	3546333	NM_002561	P2RX5	17	3486018	4483633	1	17p13.3 - 17p13.2	997616	11	Deletion	1.23072
17	3523271	3546333	NM_175080	P2RX5	17	3486018	4483633	1	17p13.3 - 17p13.2	997616	11	Deletion	1.23072
17	3540329	3546333	NM_175081	P2RX5	17	3486018	4483633	1	17p13.3 - 17p13.2	997616	11	Deletion	1.23072
17	3564668	3651287	NM_002208	ITGAE	17	3486018	4483633	1	17p13.3 - 17p13.2	997616	11	Deletion	1.23072
17	3573946	3576742	NM_031965	GSG2	17	3486018	4483633	1	17p13.3 - 17p13.2	997616	11	Deletion	1.23072
17	3661209	3696290	NM_001114118	C17orf85	17	3486018	4483633	1	17p13.3 - 17p13.2	997616	11	Deletion	1.23072
17	3661209	3696290	NM_018553	C17orf85	17	3486018	4483633	1	17p13.3 - 17p13.2	997616	11	Deletion	1.23072
17	3710366	3743087	NM_032294	CAMKK1	17	3486018	4483633	1	17p13.3 - 17p13.2	997616	11	Deletion	1.23072
17	3710366	3740787	NM_172206	CAMKK1	17	3486018	4483633	1	17p13.3 - 17p13.2	997616	11	Deletion	1.23072
17	3715200	3743087	NM_172207	CAMKK1	17	3486018	4483633	1	17p13.3 - 17p13.2	997616	11	Deletion	1.23072
17	3746634	3766710	NM_002558	P2RX1	17	3486018	4483633	1	17p13.3 - 17p13.2	997616	11	Deletion	1.23072
17	3773918	3814486	NM_005173	ATP2A3	17	3486018	4483633	1	17p13.3 - 17p13.2	997616	11	Deletion	1.23072
17	3773918	3814486	NM_174953	ATP2A3	17	3486018	4483633	1	17p13.3 - 17p13.2	997616	11	Deletion	1.23072
17	3773918	3814486	NM_174954	ATP2A3	17	3486018	4483633	1	17p13.3 - 17p13.2	997616	11	Deletion	1.23072
17	3773918	3814486	NM_174955	ATP2A3	17	3486018	4483633	1	17p13.3 - 17p13.2	997616	11	Deletion	1.23072
17	3773918	3814486	NM_174956	ATP2A3	17	3486018	4483633	1	17p13.3 - 17p13.2	997616	11	Deletion	1.23072
17	3773918	3814486	NM_174957	ATP2A3	17	3486018	4483633	1	17p13.3 - 17p13.2	997616	11	Deletion	1.23072
17	3773918	3814486	NM_174958	ATP2A3	17	3486018	4483633	1	17p13.3 - 17p13.2	997616	11	Deletion	1.23072
17	3854488	3993003	NM_015113	ZZEF1	17	3486018	4483633	1	17p13.3 - 17p13.2	997616	11	Deletion	1.23072
17	3993211	4007741	NM_144611	CYB5D2	17	3486018	4483633	1	17p13.3 - 17p13.2	997616	11	Deletion	1.23072
17	3993211	4007741	NR_023346	CYB5D2	17	3486018	4483633	1	17p13.3 - 17p13.2	997616	11	Deletion	1.23072
17	3993211	4007741	NR_023347	CYB5D2	17	3486018	4483633	1	17p13.3 - 17p13.2	997616	11	Deletion	1.23072
17	4013414	4114024	NM_016376	ANKFY1	17	3486018	4483633	1	17p13.3 - 17p13.2	997616	11	Deletion	1.23072
17	4044522	4114024	NM_020740	ANKFY1	17	3486018	4483633	1	17p13.3 - 17p13.2	997616	11	Deletion	1.23072
17	4119261	4216719	NM_003342	UBE2G1	17	3486018	4483633	1	17p13.3 - 17p13.2	997616	11	Deletion	1.23072
17	4283968	4338249	NM_182538	SPNS3	17	3486018	4483633	1	17p13.3 - 17p13.2	997616	11	Deletion	1.23072
17	4348878	4389978	NM_001124758	SPNS2	17	3486018	4483633	1	17p13.3 - 17p13.2	997616	11	Deletion	1.23072
17	4388940	4405431	NM_001105538	MYBBP1A	17	3486018	4483633	1	17p13.3 - 17p13.2	997616	11	Deletion	1.23072
17	4388940	4405431	NM_014520	MYBBP1A	17	3486018	4483633	1	17p13.3 - 17p13.2	997616	11	Deletion	1.23072
17	4406971	4410626	NM_001122890	GGT6	17	3486018	4483633	1	17p13.3 - 17p13.2	997616	11	Deletion	1.23072
17	4406971	4410626	NM_153338	GGT6	17	3486018	4483633	1	17p13.3 - 17p13.2	997616	11	Deletion	1.23072
17	4434025	4458364	NM_198501	SMTNL2	17	3486018	4483633	1	17p13.3 - 17p13.2	997616	11	Deletion	1.23072
17	4434583	4458364	NM_001114974	SMTNL2	17	3486018	4483633	1	17p13.3 - 17p13.2	997616	11	Deletion	1.23072
17	4480963	4491710	NM_001140	ALOX15	17	3486018	4483633	0.248511	17p13.3 - 17p13.2	997616	11	Deletion	1.23072
17	4480963	4491710	NM_001140	ALOX15	17	4483633	4901382	0.751582	17p13.2	417750	11	Deletion	1.24374
17	4521428	4554382	NM_014389	PELP1	17	4483633	4901382	1	17p13.2	417750	11	Deletion	1.24374
17	4560538	4571545	NM_004313	ARRB2	17	4483633	4901382	1	17p13.2	417750	11	Deletion	1.24374
17	4560538	4571545	NM_199004	ARRB2	17	4483633	4901382	1	17p13.2	417750	11	Deletion	1.24374
17	4581472	4583646	NM_001001683	MED11	17	4483633	4901382	1	17p13.2	417750	11	Deletion	1.24374
17	4583577	4589973	NM_022059	CXCL16	17	4483633	4901382	1	17p13.2	417750	11	Deletion	1.24374
17	4584553	4589973	NM_001100812	CXCL16	17	4483633	4901382	1	17p13.2	417750	11	Deletion	1.24374
17	4590068	4596160	NM_001136046	ZMYND15	17	4483633	4901382	1	17p13.2	417750	11	Deletion	1.24374
17	4590086	4596157	NM_032265	ZMYND15	17	4483633	4901382	1	17p13.2	417750	11	Deletion	1.24374
17	4621936	4633254	NM_003963	TM4SF5	17	4483633	4901382	1	17p13.2	417750	11	Deletion	1.24374
17	4635320	4636470	NM_001144939	VMO1	17	4483633	4901382	1	17p13.2	417750	11	Deletion	1.24374
17	4635320	4636470	NM_001144940	VMO1	17	4483633	4901382	1	17p13.2	417750	11	Deletion	1.24374
17	4635320	4636470	NM_001144941	VMO1	17	4483633	4901382	1	17p13.2	417750	11	Deletion	1.24374
17	4635320	4636470	NM_182566	VMO1	17	4483633	4901382	1	17p13.2	417750	11	Deletion	1.24374
17	4638994	4640625	NM_001014985	GLTPD2	17	4483633	4901382	1	17p13.2	417750	11	Deletion	1.24374
17	4646415	4648749	NM_002798	PSMB6	17	4483633	4901382	1	17p13.2	417750	11	Deletion	1.24374
17	4657378	4673695	NM_002663	PLD2	17	4483633	4901382	1	17p13.2	417750	11	Deletion	1.24374
17	4683303	4742136	NM_001024937	MINK1	17	4483633	4901382	1	17p13.2	417750	11	Deletion	1.24374
17	4683303	4742136	NM_015716	MINK1	17	4483633	4901382	1	17p13.2	417750	11	Deletion	1.24374
17	4683303	4742136	NM_153827	MINK1	17	4483633	4901382	1	17p13.2	417750	11	Deletion	1.24374
17	4683303	4742136	NM_170663	MINK1	17	4483633	4901382	1	17p13.2	417750	11	Deletion	1.24374
17	4741840	4747149	NM_000080	CHRNE	17	4483633	4901382	1	17p13.2	417750	11	Deletion	1.24374
17	4743727	4747007	NM_001145536	C17orf107	17	4483633	4901382	1	17p13.2	417750	11	Deletion	1.24374
17	4776372	4779068	NM_000173	GP1BA	17	4483633	4901382	1	17p13.2	417750	11	Deletion	1.24374
17	4781170	4784208	NM_001165417	SLC25A11	17	4483633	4901382	1	17p13.2	417750	11	Deletion	1.24374
17	4781170	4784208	NM_001165418	SLC25A11	17	4483633	4901382	1	17p13.2	417750	11	Deletion	1.24374
17	4781170	4784208	NM_003562	SLC25A11	17	4483633	4901382	1	17p13.2	417750	11	Deletion	1.24374
17	4784375	4789263	NM_015528	RNF167	17	4483633	4901382	1	17p13.2	417750	11	Deletion	1.24374
17	4789692	4792571	NM_005022	PFN1	17	4483633	4901382	1	17p13.2	417750	11	Deletion	1.24374
17	4795129	4801151	NM_001193503	ENO3	17	4483633	4901382	1	17p13.2	417750	11	Deletion	1.24374
17	4795129	4801151	NM_001976	ENO3	17	4483633	4901382	1	17p13.2	417750	11	Deletion	1.24374
17	4795129	4801151	NM_053013	ENO3	17	4483633	4901382	1	17p13.2	417750	11	Deletion	1.24374
17	4803244	4811857	NM_004890	SPAG7	17	4483633	4901382	1	17p13.2	417750	11	Deletion	1.24374
17	4812011	4831685	NM_001171166	CAMTA2	17	4483633	4901382	1	17p13.2	417750	11	Deletion	1.24374
17	4812011	4831390	NM_001171167	CAMTA2	17	4483633	4901382	1	17p13.2	417750	11	Deletion	1.24374
17	4812011	4831390	NM_001171168	CAMTA2	17	4483633	4901382	1	17p13.2	417750	11	Deletion	1.24374
17	4812011	4831685	NM_015099	CAMTA2	17	4483633	4901382	1	17p13.2	417750	11	Deletion	1.24374
17	4832149	4841630	NM_001167985	INCA1	17	4483633	4901382	1	17p13.2	417750	11	Deletion	1.24374
17	4832149	4841630	NM_001167986	INCA1	17	4483633	4901382	1	17p13.2	417750	11	Deletion	1.24374
17	4832149	4841630	NM_001167987	INCA1	17	4483633	4901382	1	17p13.2	417750	11	Deletion	1.24374
17	4832149	4841630	NM_213726	INCA1	17	4483633	4901382	1	17p13.2	417750	11	Deletion	1.24374
17	4841967	4872419	NM_006612	KIF1C	17	4483633	4901382	1	17p13.2	417750	11	Deletion	1.24374
17	4876621	4879452	NM_001104577	GPR172B	17	4483633	4901382	1	17p13.2	417750	11	Deletion	1.24374
17	4876621	4879452	NM_017986	GPR172B	17	4483633	4901382	1	17p13.2	417750	11	Deletion	1.24374
17	4922478	4940394	NM_153018	ZFP3	17	4901382	5103900	1	17p13.2	202519	11	Deletion	1.27122
17	4949755	4967122	NM_014519	ZNF232	17	4901382	5103900	1	17p13.2	202519	11	Deletion	1.27122
17	4972411	5019049	NM_004505	USP6	17	4901382	5103900	1	17p13.2	202519	11	Deletion	1.27122
17	5023555	5035903	NM_032530	ZNF594	17	4901382	5103900	1	17p13.2	202519	11	Deletion	1.27122
17	5036103	5079656	NR_034082	LOC100130950	17	4901382	5103900	1	17p13.2	202519	11	Deletion	1.27122
17	5054625	5078808	NM_207103	C17orf87	17	4901382	5103900	1	17p13.2	202519	11	Deletion	1.27122
17	6267783	6279244	NM_001033054	AIPL1	17	6253449	6283342	1	17p13.2	29894	11	Deletion	1.24651
17	6267783	6279244	NM_001033055	AIPL1	17	6253449	6283342	1	17p13.2	29894	11	Deletion	1.24651
17	6267783	6279244	NM_014336	AIPL1	17	6253449	6283342	1	17p13.2	29894	11	Deletion	1.24651
17	6288459	6295110	NM_001195228	FAM64A	17	6283342	7060679	1	17p13.2 - 17p13.1	777338	11	Deletion	1.27358
17	6288459	6295110	NM_019013	FAM64A	17	6283342	7060679	1	17p13.2 - 17p13.1	777338	11	Deletion	1.27358
17	6295307	6400602	NM_001165966	PITPNM3	17	6283342	7060679	1	17p13.2 - 17p13.1	777338	11	Deletion	1.27358
17	6295307	6400602	NM_031220	PITPNM3	17	6283342	7060679	1	17p13.2 - 17p13.1	777338	11	Deletion	1.27358
17	6422369	6484972	NM_014804	KIAA0753	17	6283342	7060679	1	17p13.2 - 17p13.1	777338	11	Deletion	1.27358
17	6484946	6488586	NM_032731	TXNDC17	17	6283342	7060679	1	17p13.2 - 17p13.1	777338	11	Deletion	1.27358
17	6487357	6495679	NM_016060	MED31	17	6283342	7060679	1	17p13.2 - 17p13.1	777338	11	Deletion	1.27358
17	6495783	6497342	NM_001105520	C17orf100	17	6283342	7060679	1	17p13.2 - 17p13.1	777338	11	Deletion	1.27358
17	6528763	6557465	NM_001143838	SLC13A5	17	6283342	7060679	1	17p13.2 - 17p13.1	777338	11	Deletion	1.27358
17	6528763	6557465	NM_177550	SLC13A5	17	6283342	7060679	1	17p13.2 - 17p13.1	777338	11	Deletion	1.27358
17	6599880	6619689	NM_017523	XAF1	17	6283342	7060679	1	17p13.2 - 17p13.1	777338	11	Deletion	1.27358
17	6599880	6619689	NM_199139	XAF1	17	6283342	7060679	1	17p13.2 - 17p13.1	777338	11	Deletion	1.27358
17	6620276	6631690	NM_153230	FBXO39	17	6283342	7060679	1	17p13.2 - 17p13.1	777338	11	Deletion	1.27358
17	6644024	6675785	NM_053285	TEKT1	17	6283342	7060679	1	17p13.2 - 17p13.1	777338	11	Deletion	1.27358
17	6697619	6744393	NR_002710	ALOX12P2	17	6283342	7060679	1	17p13.2 - 17p13.1	777338	11	Deletion	1.27358
17	6840108	6854780	NM_000697	ALOX12	17	6283342	7060679	1	17p13.2 - 17p13.1	777338	11	Deletion	1.27358
17	6856522	6858576	NM_001004333	RNASEK	17	6283342	7060679	1	17p13.2 - 17p13.1	777338	11	Deletion	1.27358
17	6858797	6861564	NM_001142798	C17orf49	17	6283342	7060679	1	17p13.2 - 17p13.1	777338	11	Deletion	1.27358
17	6858797	6861564	NM_001142799	C17orf49	17	6283342	7060679	1	17p13.2 - 17p13.1	777338	11	Deletion	1.27358
17	6858797	6861564	NM_174893	C17orf49	17	6283342	7060679	1	17p13.2 - 17p13.1	777338	11	Deletion	1.27358
17	6861658	6861745	NR_029712	MIR195	17	6283342	7060679	1	17p13.2 - 17p13.1	777338	11	Deletion	1.27358
17	6861954	6862066	NR_030178	MIR497	17	6283342	7060679	1	17p13.2 - 17p13.1	777338	11	Deletion	1.27358
17	6867093	6873686	NM_181844	BCL6B	17	6283342	7060679	1	17p13.2 - 17p13.1	777338	11	Deletion	1.27358
17	6880118	6884165	NM_201566	SLC16A13	17	6283342	7060679	1	17p13.2 - 17p13.1	777338	11	Deletion	1.27358
17	6885673	6887967	NM_153357	SLC16A11	17	6283342	7060679	1	17p13.2 - 17p13.1	777338	11	Deletion	1.27358
17	6918580	6924325	NM_006344	CLEC10A	17	6283342	7060679	1	17p13.2 - 17p13.1	777338	11	Deletion	1.27358
17	6918580	6924325	NM_182906	CLEC10A	17	6283342	7060679	1	17p13.2 - 17p13.1	777338	11	Deletion	1.27358
17	6945365	6958853	NM_001181	ASGR2	17	6283342	7060679	1	17p13.2 - 17p13.1	777338	11	Deletion	1.27358
17	6945365	6958853	NM_080912	ASGR2	17	6283342	7060679	1	17p13.2 - 17p13.1	777338	11	Deletion	1.27358
17	6945365	6958853	NM_080913	ASGR2	17	6283342	7060679	1	17p13.2 - 17p13.1	777338	11	Deletion	1.27358
17	6945365	6958354	NM_080914	ASGR2	17	6283342	7060679	1	17p13.2 - 17p13.1	777338	11	Deletion	1.27358
17	7017475	7023608	NM_001197216	ASGR1	17	6283342	7060679	1	17p13.2 - 17p13.1	777338	11	Deletion	1.27358
17	7017475	7023608	NM_001671	ASGR1	17	6283342	7060679	1	17p13.2 - 17p13.1	777338	11	Deletion	1.27358
17	7033934	7061653	NM_001128827	DLG4	17	6283342	7060679	0.964863	17p13.2 - 17p13.1	777338	11	Deletion	1.27358
17	7033934	7061653	NM_001128827	DLG4	17	7060679	8086066	0.0351732	17p13.1	1025388	11	Deletion	1.21968
17	7033934	7064094	NM_001365	DLG4	17	6283342	7060679	0.886774	17p13.2 - 17p13.1	777338	11	Deletion	1.27358
17	7033934	7064094	NM_001365	DLG4	17	7060679	8086066	0.113259	17p13.1	1025388	11	Deletion	1.21968
17	7063877	7069310	NM_000018	ACADVL	17	7060679	8086066	1	17p13.1	1025388	11	Deletion	1.21968
17	7063877	7069310	NM_001033859	ACADVL	17	7060679	8086066	1	17p13.1	1025388	11	Deletion	1.21968
17	7067340	7067423	NR_029896	MIR324	17	7060679	8086066	1	17p13.1	1025388	11	Deletion	1.21968
17	7069385	7078588	NM_004422	DVL2	17	7060679	8086066	1	17p13.1	1025388	11	Deletion	1.21968
17	7079071	7083550	NM_024297	PHF23	17	7060679	8086066	1	17p13.1	1025388	11	Deletion	1.21968
17	7084462	7086478	NM_007278	GABARAP	17	7060679	8086066	1	17p13.1	1025388	11	Deletion	1.21968
17	7087630	7095720	NM_001143775	CTDNEP1	17	7060679	8086066	1	17p13.1	1025388	11	Deletion	1.21968
17	7087630	7095984	NM_015343	CTDNEP1	17	7060679	8086066	1	17p13.1	1025388	11	Deletion	1.21968
17	7096096	7103984	NM_203415	C17orf81	17	7060679	8086066	1	17p13.1	1025388	11	Deletion	1.21968
17	7096275	7103984	NM_015362	C17orf81	17	7060679	8086066	1	17p13.1	1025388	11	Deletion	1.21968
17	7096275	7103984	NM_203413	C17orf81	17	7060679	8086066	1	17p13.1	1025388	11	Deletion	1.21968
17	7096275	7103984	NM_203414	C17orf81	17	7060679	8086066	1	17p13.1	1025388	11	Deletion	1.21968
17	7103946	7107237	NM_001185022	CLDN7	17	7060679	8086066	1	17p13.1	1025388	11	Deletion	1.21968
17	7103946	7106989	NM_001185023	CLDN7	17	7060679	8086066	1	17p13.1	1025388	11	Deletion	1.21968
17	7103946	7106989	NM_001307	CLDN7	17	7060679	8086066	1	17p13.1	1025388	11	Deletion	1.21968
17	7125778	7132092	NM_001042	SLC2A4	17	7060679	8086066	1	17p13.1	1025388	11	Deletion	1.21968
17	7132295	7138601	NM_015982	YBX2	17	7060679	8086066	1	17p13.1	1025388	11	Deletion	1.21968
17	7151042	7156507	NM_001143760	EIF5A	17	7060679	8086066	1	17p13.1	1025388	11	Deletion	1.21968
17	7151580	7156507	NM_001970	EIF5A	17	7060679	8086066	1	17p13.1	1025388	11	Deletion	1.21968
17	7152012	7156507	NM_001143761	EIF5A	17	7060679	8086066	1	17p13.1	1025388	11	Deletion	1.21968
17	7152418	7156507	NM_001143762	EIF5A	17	7060679	8086066	1	17p13.1	1025388	11	Deletion	1.21968
17	7156702	7159383	NM_004489	GPS2	17	7060679	8086066	1	17p13.1	1025388	11	Deletion	1.21968
17	7159675	7173363	NM_001005408	NEURL4	17	7060679	8086066	1	17p13.1	1025388	11	Deletion	1.21968
17	7159675	7173363	NM_032442	NEURL4	17	7060679	8086066	1	17p13.1	1025388	11	Deletion	1.21968
17	7180572	7195518	NM_014716	ACAP1	17	7060679	8086066	1	17p13.1	1025388	11	Deletion	1.21968
17	7195932	7198987	NM_001002914	KCTD11	17	7060679	8086066	1	17p13.1	1025388	11	Deletion	1.21968
17	7199221	7201263	NM_198154	TMEM95	17	7060679	8086066	1	17p13.1	1025388	11	Deletion	1.21968
17	7225089	7233817	NM_003985	TNK1	17	7060679	8086066	1	17p13.1	1025388	11	Deletion	1.21968
17	7233779	7238568	NM_020360	PLSCR3	17	7060679	8086066	1	17p13.1	1025388	11	Deletion	1.21968
17	7247019	7248143	NM_152766	C17orf61	17	7060679	8086066	1	17p13.1	1025388	11	Deletion	1.21968
17	7252226	7263904	NM_020795	NLGN2	17	7060679	8086066	1	17p13.1	1025388	11	Deletion	1.21968
17	7264403	7265676	NM_199339	SPEM1	17	7060679	8086066	1	17p13.1	1025388	11	Deletion	1.21968
17	7269659	7271611	NM_175734	C17orf74	17	7060679	8086066	1	17p13.1	1025388	11	Deletion	1.21968
17	7279486	7281723	NM_178518	TMEM102	17	7060679	8086066	1	17p13.1	1025388	11	Deletion	1.21968
17	7283413	7288976	NM_004112	FGF11	17	7060679	8086066	1	17p13.1	1025388	11	Deletion	1.21968
17	7289130	7301657	NM_000747	CHRNB1	17	7060679	8086066	1	17p13.1	1025388	11	Deletion	1.21968
17	7303409	7323669	NM_001128833	ZBTB4	17	7060679	8086066	1	17p13.1	1025388	11	Deletion	1.21968
17	7303409	7328293	NM_020899	ZBTB4	17	7060679	8086066	1	17p13.1	1025388	11	Deletion	1.21968
17	7325445	7327108	NM_001102614	AMAC1L3	17	7060679	8086066	1	17p13.1	1025388	11	Deletion	1.21968
17	7328422	7358660	NM_000937	POLR2A	17	7060679	8086066	1	17p13.1	1025388	11	Deletion	1.21968
17	7393099	7401932	NM_003809	TNFSF12	17	7060679	8086066	1	17p13.1	1025388	11	Deletion	1.21968
17	7393099	7401932	NR_037146	TNFSF12	17	7060679	8086066	1	17p13.1	1025388	11	Deletion	1.21968
17	7393099	7405650	NM_172089	TNFSF12-TNFSF13	17	7060679	8086066	1	17p13.1	1025388	11	Deletion	1.21968
17	7402333	7405650	NM_001198622	TNFSF13	17	7060679	8086066	1	17p13.1	1025388	11	Deletion	1.21968
17	7402333	7405650	NM_001198623	TNFSF13	17	7060679	8086066	1	17p13.1	1025388	11	Deletion	1.21968
17	7402333	7405650	NM_001198624	TNFSF13	17	7060679	8086066	1	17p13.1	1025388	11	Deletion	1.21968
17	7402333	7405650	NM_003808	TNFSF13	17	7060679	8086066	1	17p13.1	1025388	11	Deletion	1.21968
17	7402333	7405650	NM_172087	TNFSF13	17	7060679	8086066	1	17p13.1	1025388	11	Deletion	1.21968
17	7402333	7405650	NM_172088	TNFSF13	17	7060679	8086066	1	17p13.1	1025388	11	Deletion	1.21968
17	7406043	7416012	NM_015670	SENP3	17	7060679	8086066	1	17p13.1	1025388	11	Deletion	1.21968
17	7416781	7423049	NM_001416	EIF4A1	17	7060679	8086066	1	17p13.1	1025388	11	Deletion	1.21968
17	7418755	7418890	NR_002918	SNORA48	17	7060679	8086066	1	17p13.1	1025388	11	Deletion	1.21968
17	7420853	7421001	NR_002604	SNORD10	17	7060679	8086066	1	17p13.1	1025388	11	Deletion	1.21968
17	7421997	7422134	NR_002912	SNORA67	17	7060679	8086066	1	17p13.1	1025388	11	Deletion	1.21968
17	7423529	7426154	NM_001251	CD68	17	7060679	8086066	1	17p13.1	1025388	11	Deletion	1.21968
17	7423530	7426154	NM_001040059	CD68	17	7060679	8086066	1	17p13.1	1025388	11	Deletion	1.21968
17	7427689	7432252	NM_004870	MPDU1	17	7060679	8086066	1	17p13.1	1025388	11	Deletion	1.21968
17	7427689	7432252	NR_024603	MPDU1	17	7060679	8086066	1	17p13.1	1025388	11	Deletion	1.21968
17	7432222	7434213	NM_006942	SOX15	17	7060679	8086066	1	17p13.1	1025388	11	Deletion	1.21968
17	7435272	7458941	NM_004860	FXR2	17	7060679	8086066	1	17p13.1	1025388	11	Deletion	1.21968
17	7458107	7477426	NR_027463	SHBG	17	7060679	8086066	1	17p13.1	1025388	11	Deletion	1.21968
17	7470281	7471920	NM_133491	SAT2	17	7060679	8086066	1	17p13.1	1025388	11	Deletion	1.21968
17	7472012	7477426	NR_027462	SHBG	17	7060679	8086066	1	17p13.1	1025388	11	Deletion	1.21968
17	7474178	7477426	NM_001040	SHBG	17	7060679	8086066	1	17p13.1	1025388	11	Deletion	1.21968
17	7474178	7477426	NM_001146279	SHBG	17	7060679	8086066	1	17p13.1	1025388	11	Deletion	1.21968
17	7474178	7477426	NM_001146280	SHBG	17	7060679	8086066	1	17p13.1	1025388	11	Deletion	1.21968
17	7474178	7477426	NM_001146281	SHBG	17	7060679	8086066	1	17p13.1	1025388	11	Deletion	1.21968
17	7494979	7501815	NM_001678	ATP1B2	17	7060679	8086066	1	17p13.1	1025388	11	Deletion	1.21968
17	7512445	7531589	NM_000546	TP53	17	7060679	8086066	1	17p13.1	1025388	11	Deletion	1.21968
17	7512445	7531589	NM_001126112	TP53	17	7060679	8086066	1	17p13.1	1025388	11	Deletion	1.21968
17	7512445	7531589	NM_001126113	TP53	17	7060679	8086066	1	17p13.1	1025388	11	Deletion	1.21968
17	7512445	7531589	NM_001126114	TP53	17	7060679	8086066	1	17p13.1	1025388	11	Deletion	1.21968
17	7512445	7519537	NM_001126115	TP53	17	7060679	8086066	1	17p13.1	1025388	11	Deletion	1.21968
17	7512445	7519537	NM_001126116	TP53	17	7060679	8086066	1	17p13.1	1025388	11	Deletion	1.21968
17	7512445	7519537	NM_001126117	TP53	17	7060679	8086066	1	17p13.1	1025388	11	Deletion	1.21968
17	7530114	7547546	NM_001143990	WRAP53	17	7060679	8086066	1	17p13.1	1025388	11	Deletion	1.21968
17	7531483	7547546	NM_001143991	WRAP53	17	7060679	8086066	1	17p13.1	1025388	11	Deletion	1.21968
17	7532392	7547546	NM_001143992	WRAP53	17	7060679	8086066	1	17p13.1	1025388	11	Deletion	1.21968
17	7532392	7547546	NM_018081	WRAP53	17	7060679	8086066	1	17p13.1	1025388	11	Deletion	1.21968
17	7549245	7555419	NM_001406	EFNB3	17	7060679	8086066	1	17p13.1	1025388	11	Deletion	1.21968
17	7563764	7677784	NM_020877	DNAH2	17	7060679	8086066	1	17p13.1	1025388	11	Deletion	1.21968
17	7598363	7599012	NR_002778	RPL29P2	17	7060679	8086066	1	17p13.1	1025388	11	Deletion	1.21968
17	7683960	7698844	NM_001080424	KDM6B	17	7060679	8086066	1	17p13.1	1025388	11	Deletion	1.21968
17	7699109	7700143	NM_203411	TMEM88	17	7060679	8086066	1	17p13.1	1025388	11	Deletion	1.21968
17	7700728	7701898	NM_032356	LSMD1	17	7060679	8086066	1	17p13.1	1025388	11	Deletion	1.21968
17	7701789	7706326	NM_144607	CYB5D1	17	7060679	8086066	1	17p13.1	1025388	11	Deletion	1.21968
17	7728848	7756801	NM_001005271	CHD3	17	7060679	8086066	1	17p13.1	1025388	11	Deletion	1.21968
17	7732894	7756801	NM_001005273	CHD3	17	7060679	8086066	1	17p13.1	1025388	11	Deletion	1.21968
17	7732894	7756801	NM_005852	CHD3	17	7060679	8086066	1	17p13.1	1025388	11	Deletion	1.21968
17	7750166	7750304	NR_003000	SCARNA21	17	7060679	8086066	1	17p13.1	1025388	11	Deletion	1.21968
17	7757365	7759991	NR_024349	LOC284023	17	7060679	8086066	1	17p13.1	1025388	11	Deletion	1.21968
17	7766752	7773479	NM_004732	KCNAB3	17	7060679	8086066	1	17p13.1	1025388	11	Deletion	1.21968
17	7774388	7776043	NM_001166621	TRAPPC1	17	7060679	8086066	1	17p13.1	1025388	11	Deletion	1.21968
17	7774388	7775993	NM_021210	TRAPPC1	17	7060679	8086066	1	17p13.1	1025388	11	Deletion	1.21968
17	7774388	7775993	NR_030684	TRAPPC1	17	7060679	8086066	1	17p13.1	1025388	11	Deletion	1.21968
17	7774388	7776043	NR_030697	TRAPPC1	17	7060679	8086066	1	17p13.1	1025388	11	Deletion	1.21968
17	7776198	7793622	NM_001037144	CNTROB	17	7060679	8086066	1	17p13.1	1025388	11	Deletion	1.21968
17	7776198	7793622	NM_053051	CNTROB	17	7060679	8086066	1	17p13.1	1025388	11	Deletion	1.21968
17	7846713	7864384	NM_000180	GUCY2D	17	7060679	8086066	1	17p13.1	1025388	11	Deletion	1.21968
17	7883083	7893177	NM_001039130	ALOX15B	17	7060679	8086066	1	17p13.1	1025388	11	Deletion	1.21968
17	7883083	7893177	NM_001039131	ALOX15B	17	7060679	8086066	1	17p13.1	1025388	11	Deletion	1.21968
17	7883083	7893177	NM_001141	ALOX15B	17	7060679	8086066	1	17p13.1	1025388	11	Deletion	1.21968
17	7916679	7931747	NM_001139	ALOX12B	17	7060679	8086066	1	17p13.1	1025388	11	Deletion	1.21968
17	7932099	7932191	NR_036201	MIR4314	17	7060679	8086066	1	17p13.1	1025388	11	Deletion	1.21968
17	7939943	7962960	NM_001165960	ALOXE3	17	7060679	8086066	1	17p13.1	1025388	11	Deletion	1.21968
17	7939943	7962586	NM_021628	ALOXE3	17	7060679	8086066	1	17p13.1	1025388	11	Deletion	1.21968
17	7964633	7968136	NM_001165967	HES7	17	7060679	8086066	1	17p13.1	1025388	11	Deletion	1.21968
17	7964633	7968136	NM_032580	HES7	17	7060679	8086066	1	17p13.1	1025388	11	Deletion	1.21968
17	7984513	7996479	NM_002616	PER1	17	7060679	8086066	1	17p13.1	1025388	11	Deletion	1.21968
17	8003190	8007019	NM_014232	VAMP2	17	7060679	8086066	1	17p13.1	1025388	11	Deletion	1.21968
17	8017021	8020440	NM_032354	TMEM107	17	7060679	8086066	1	17p13.1	1025388	11	Deletion	1.21968
17	8017021	8020440	NM_183065	TMEM107	17	7060679	8086066	1	17p13.1	1025388	11	Deletion	1.21968
17	8031218	8031303	NR_037447	MIR3676	17	7060679	8086066	1	17p13.1	1025388	11	Deletion	1.21968
17	8032376	8034290	NM_017622	C17orf59	17	7060679	8086066	1	17p13.1	1025388	11	Deletion	1.21968
17	8048774	8054609	NM_004217	AURKB	17	7060679	8086066	1	17p13.1	1025388	11	Deletion	1.21968
17	8064673	8068087	NR_026951	C17orf44	17	7060679	8086066	1	17p13.1	1025388	11	Deletion	1.21968
17	8068864	8092139	NM_025099	C17orf68	17	7060679	8086066	0.739087	17p13.1	1025388	11	Deletion	1.21968
17	8183913	8190089	NM_153007	ODF4	17	8169322	8235733	1	17p13.1	66412	11	Deletion	1.28467
17	8202456	8204585	NR_024447	LOC100128288	17	8169322	8235733	1	17p13.1	66412	11	Deletion	1.28467
17	8212698	8215584	NM_213597	KRBA2	17	8169322	8235733	1	17p13.1	66412	11	Deletion	1.28467
17	8221559	8227291	NM_000987	RPL26	17	8169322	8235733	1	17p13.1	66412	11	Deletion	1.28467
17	8234748	8241870	NM_001146684	RNF222	17	8169322	8235733	0.138425	17p13.1	66412	11	Deletion	1.28467
17	8234748	8241870	NM_001146684	RNF222	17	8235733	8301119	0.861716	17p13.1	65387	11	Deletion	1.32639
17	8279904	8312207	NM_001025579	NDEL1	17	8235733	8301119	0.656761	17p13.1	65387	11	Deletion	1.32639
17	8279904	8312207	NM_001025579	NDEL1	17	8301119	9103276	0.34327	17p13.1	802158	11	Deletion	1.30599
17	8279904	8312207	NM_030808	NDEL1	17	8235733	8301119	0.656761	17p13.1	65387	11	Deletion	1.32639
17	8279904	8312207	NM_030808	NDEL1	17	8301119	9103276	0.34327	17p13.1	802158	11	Deletion	1.30599
17	8318255	8474762	NM_005964	MYH10	17	8301119	9103276	1	17p13.1	802158	11	Deletion	1.30599
17	8573971	8588880	NM_001158261	CCDC42	17	8301119	9103276	1	17p13.1	802158	11	Deletion	1.30599
17	8573971	8588880	NM_144681	CCDC42	17	8301119	9103276	1	17p13.1	802158	11	Deletion	1.30599
17	8597149	8602603	NM_001128076	SPDYE4	17	8301119	9103276	1	17p13.1	802158	11	Deletion	1.30599
17	8641153	8643393	NM_152599	MFSD6L	17	8301119	9103276	1	17p13.1	802158	11	Deletion	1.30599
17	8646780	8711720	NM_001010855	PIK3R6	17	8301119	9103276	1	17p13.1	802158	11	Deletion	1.30599
17	8722958	8809750	NM_001142633	PIK3R5	17	8301119	9103276	1	17p13.1	802158	11	Deletion	1.30599
17	8722958	8756560	NM_014308	PIK3R5	17	8301119	9103276	1	17p13.1	802158	11	Deletion	1.30599
17	8865584	9088043	NM_004822	NTN1	17	8301119	9103276	1	17p13.1	802158	11	Deletion	1.30599
17	9094513	9420001	NM_004853	STX8	17	8301119	9103276	0.0269256	17p13.1	802158	11	Deletion	1.30599
17	9094513	9420001	NR_033656	STX8	17	8301119	9103276	0.0269256	17p13.1	802158	11	Deletion	1.30599
17	10524374	10541611	NM_004589	SCO1	17	10505231	10684133	1	17p13.1	178903	11	Deletion	1.32404
17	10541652	10555601	NM_020233	C17orf48	17	10505231	10684133	1	17p13.1	178903	11	Deletion	1.32404
17	10557364	10574372	NM_001004313	TMEM220	17	10505231	10684133	1	17p13.1	178903	11	Deletion	1.32404
17	10638955	10648142	NR_036581	LOC100289255	17	10505231	10684133	1	17p13.1	178903	11	Deletion	1.32404
17	10666517	10682144	NM_001101387	PIRT	17	10505231	10684133	1	17p13.1	178903	11	Deletion	1.32404
17	11864860	11987777	NM_003010	MAP2K4	17	11851659	12120314	1	17p12	268656	11	Deletion	1.29748
17	11925941	11926039	NR_030613	MIR744	17	11851659	12120314	1	17p12	268656	11	Deletion	1.29748
17	13339731	13445970	NM_006042	HS3ST3A1	17	13144874	13505663	1	17p12	360790	11	Deletion	1.27454
17	13868540	13869641	NR_003261	CDRT15P	17	13819784	14157308	1	17p12	337525	11	Deletion	1.30336
17	13913444	14052722	NM_001303	COX10	17	13819784	14157308	1	17p12	337525	11	Deletion	1.30336
17	14079898	14080876	NM_001007530	CDRT15	17	13819784	14157308	1	17p12	337525	11	Deletion	1.30336
17	14145231	14190218	NM_006041	HS3ST3B1	17	13819784	14157308	0.268472	17p12	337525	11	Deletion	1.30336
17	14147782	14149788	NR_026880	MGC12916	17	13819784	14157308	1	17p12	337525	11	Deletion	1.30336
17	15073821	15106615	NM_153321	PMP22	17	15077303	15303401	0.893825	17p12	226099	11	Deletion	1.31242
17	15073822	15109370	NM_000304	PMP22	17	15077303	15303401	0.902079	17p12	226099	11	Deletion	1.31242
17	15073822	15104819	NM_153322	PMP22	17	15077303	15303401	0.887702	17p12	226099	11	Deletion	1.31242
17	15147854	15185684	NM_031898	TEKT3	17	15077303	15303401	1	17p12	226099	11	Deletion	1.31242
17	15280063	15311651	NM_173622	CDRT4	17	15077303	15303401	0.738833	17p12	226099	11	Deletion	1.31242
17	15280063	15311651	NM_173622	CDRT4	17	15303401	15534768	0.261199	17p12	231368	11	Deletion	1.27673
17	15346303	15407671	NM_145301	FAM18B2	17	15303401	15534768	1	17p12	231368	11	Deletion	1.27673
17	15381019	15407671	NM_001135036	FAM18B2	17	15303401	15534768	1	17p12	231368	11	Deletion	1.27673
17	15432702	15463744	NM_006382	CDRT1	17	15303401	15534768	1	17p12	231368	11	Deletion	1.27673
17	15472005	15526919	NM_006470	TRIM16	17	15303401	15534768	1	17p12	231368	11	Deletion	1.27673
17	16394356	16413246	NM_020653	ZNF287	17	16363715	16655702	1	17p11.2	291988	11	Deletion	1.29278
17	16464773	16497893	NM_020787	ZNF624	17	16363715	16655702	1	17p11.2	291988	11	Deletion	1.29278
17	16534364	16619037	NM_014695	CCDC144A	17	16363715	16655702	1	17p11.2	291988	11	Deletion	1.29278
17	16630931	16648545	NR_003190	LOC162632	17	16363715	16655702	1	17p11.2	291988	11	Deletion	1.29278
17	16632782	16634541	NR_026810	FAM106C	17	16363715	16655702	1	17p11.2	291988	11	Deletion	1.29278
17	17816852	17860915	NM_001130090	LRRC48	17	17833044	18026324	0.632535	17p11.2	193281	11	Deletion	1.27708
17	17816852	17851868	NM_001130091	LRRC48	17	17833044	18026324	0.537596	17p11.2	193281	11	Deletion	1.27708
17	17816852	17851868	NM_001130092	LRRC48	17	17833044	18026324	0.537596	17p11.2	193281	11	Deletion	1.27708
17	17816852	17860915	NM_031294	LRRC48	17	17833044	18026324	0.632535	17p11.2	193281	11	Deletion	1.27708
17	17862059	17883206	NM_145691	ATPAF2	17	17833044	18026324	1	17p11.2	193281	11	Deletion	1.27708
17	17883336	17912444	NM_024052	C17orf39	17	17833044	18026324	1	17p11.2	193281	11	Deletion	1.27708
17	17932008	17952018	NM_001388	DRG2	17	17833044	18026324	1	17p11.2	193281	11	Deletion	1.27708
17	17952745	18023842	NM_016239	MYO15A	17	17833044	18026324	1	17p11.2	193281	11	Deletion	1.27708
17	19614735	19711832	NM_001142610	ULK2	17	19608973	19795842	1	17p11.2	186870	11	Deletion	1.27708
17	19614735	19711832	NM_014683	ULK2	17	19608973	19795842	1	17p11.2	186870	11	Deletion	1.27708
17	19749342	19821722	NM_007202	AKAP10	17	19608973	19795842	0.642448	17p11.2	186870	11	Deletion	1.27708
17	19749342	19821722	NM_007202	AKAP10	17	19795842	20008596	0.357566	17p11.2	212755	11	Deletion	1.30128
17	19930927	20158660	NM_001033553	SPECC1	17	19795842	20008596	0.341056	17p11.2	212755	11	Deletion	1.30128
17	19930927	20081076	NM_152904	SPECC1	17	19795842	20008596	0.517283	17p11.2	212755	11	Deletion	1.30128
17	19999994	20081084	NM_001033554	SPECC1	17	19795842	20008596	0.106091	17p11.2	212755	11	Deletion	1.30128
17	19999994	20158660	NM_001033555	SPECC1	17	19795842	20008596	0.0542205	17p11.2	212755	11	Deletion	1.30128
8	2780282	4839737	NM_033225	CSMD1	8	3760009	3790170	0.0146456	8p23.2	30162	11	Deletion	1.38342
8	7146543	7200287	NR_027423	FAM66B	8	7156124	7183558	0.510466	8p23.1	27435	11	Deletion	1.40757
8	7157778	7164884	NR_003668	DEFB109P1B	8	7156124	7183558	1	8p23.1	27435	11	Deletion	1.40757
8	8212668	8276668	NM_001080826	SGK223	8	8206910	8377491	1	8p23.1	170582	11	Deletion	1.38633
8	24354454	24422166	NM_003817	ADAM7	8	24381586	27142832	0.599309	8p21.2	2761247	11	Deletion	1.42276
8	24827179	24832512	NM_005382	NEFM	8	24381586	27142832	1	8p21.2	2761247	11	Deletion	1.42276
8	24828360	24832512	NM_001105541	NEFM	8	24381586	27142832	1	8p21.2	2761247	11	Deletion	1.42276
8	24864386	24870049	NM_006158	NEFL	8	24381586	27142832	1	8p21.2	2761247	11	Deletion	1.42276
8	25098204	25326537	NM_024940	DOCK5	8	24381586	27142832	1	8p21.2	2761247	11	Deletion	1.42276
8	25332691	25338474	NM_000825	GNRH1	8	24381586	27142832	1	8p21.2	2761247	11	Deletion	1.42276
8	25332691	25338474	NM_001083111	GNRH1	8	24381586	27142832	1	8p21.2	2761247	11	Deletion	1.42276
8	25341281	25371902	NM_017634	KCTD9	8	24381586	27142832	1	8p21.2	2761247	11	Deletion	1.42276
8	25372430	25421343	NM_152562	CDCA2	8	24381586	27142832	1	8p21.2	2761247	11	Deletion	1.42276
8	25757490	25958310	NM_022659	EBF2	8	24381586	27142832	1	8p21.2	2761247	11	Deletion	1.42276
8	26204924	26286113	NM_002717	PPP2R2A	8	24381586	27142832	1	8p21.2	2761247	11	Deletion	1.42276
8	26206649	26286113	NM_001177591	PPP2R2A	8	24381586	27142832	1	8p21.2	2761247	11	Deletion	1.42276
8	26296440	26326562	NM_004331	BNIP3L	8	24381586	27142832	1	8p21.2	2761247	11	Deletion	1.42276
8	26418113	26427401	NM_007257	PNMA2	8	24381586	27142832	1	8p21.2	2761247	11	Deletion	1.42276
8	26427626	26571611	NM_001197293	DPYSL2	8	24381586	27142832	1	8p21.2	2761247	11	Deletion	1.42276
8	26491338	26571611	NM_001386	DPYSL2	8	24381586	27142832	1	8p21.2	2761247	11	Deletion	1.42276
8	26661584	26778840	NM_033303	ADRA1A	8	24381586	27142832	1	8p21.2	2761247	11	Deletion	1.42276
8	26669830	26778840	NM_033302	ADRA1A	8	24381586	27142832	1	8p21.2	2761247	11	Deletion	1.42276
8	26679288	26778840	NM_033304	ADRA1A	8	24381586	27142832	1	8p21.2	2761247	11	Deletion	1.42276
8	26683139	26778840	NM_000680	ADRA1A	8	24381586	27142832	1	8p21.2	2761247	11	Deletion	1.42276
8	28615072	28667122	NM_001440	EXTL3	8	28596881	30786759	1	8p21.1 - 8p12	2189879	11	Deletion	1.42025
8	28681094	28803618	NM_001145159	INTS9	8	28596881	30786759	1	8p21.1 - 8p12	2189879	11	Deletion	1.42025
8	28681094	28803352	NM_001172562	INTS9	8	28596881	30786759	1	8p21.1 - 8p12	2189879	11	Deletion	1.42025
8	28681094	28803618	NM_018250	INTS9	8	28596881	30786759	1	8p21.1 - 8p12	2189879	11	Deletion	1.42025
8	28681094	28803618	NR_026826	INTS9	8	28596881	30786759	1	8p21.1 - 8p12	2189879	11	Deletion	1.42025
8	28803830	28966162	NM_001135726	HMBOX1	8	28596881	30786759	1	8p21.1 - 8p12	2189879	11	Deletion	1.42025
8	28804144	28966162	NM_024567	HMBOX1	8	28596881	30786759	1	8p21.1 - 8p12	2189879	11	Deletion	1.42025
8	28980714	29176530	NM_015254	KIF13B	8	28596881	30786759	1	8p21.1 - 8p12	2189879	11	Deletion	1.42025
8	29249537	29262242	NM_057158	DUSP4	8	28596881	30786759	1	8p21.1 - 8p12	2189879	11	Deletion	1.42025
8	29249539	29264105	NM_001394	DUSP4	8	28596881	30786759	1	8p21.1 - 8p12	2189879	11	Deletion	1.42025
8	29634694	29661545	NR_026765	C8orf75	8	28596881	30786759	1	8p21.1 - 8p12	2189879	11	Deletion	1.42025
8	29898571	29930666	NR_024473	LOC286135	8	28596881	30786759	1	8p21.1 - 8p12	2189879	11	Deletion	1.42025
8	29934330	29934407	NR_036104	MIR3148	8	28596881	30786759	1	8p21.1 - 8p12	2189879	11	Deletion	1.42025
8	30040173	30060192	NM_016127	TMEM66	8	28596881	30786759	1	8p21.1 - 8p12	2189879	11	Deletion	1.42025
8	30072464	30114765	NM_001128208	LEPROTL1	8	28596881	30786759	1	8p21.1 - 8p12	2189879	11	Deletion	1.42025
8	30072464	30085130	NM_015344	LEPROTL1	8	28596881	30786759	1	8p21.1 - 8p12	2189879	11	Deletion	1.42025
8	30108729	30121743	NM_001100916	MBOAT4	8	28596881	30786759	1	8p21.1 - 8p12	2189879	11	Deletion	1.42025
8	30133355	30160698	NM_006571	DCTN6	8	28596881	30786759	1	8p21.1 - 8p12	2189879	11	Deletion	1.42025
8	30361486	30549277	NM_001008710	RBPMS	8	28596881	30786759	1	8p21.1 - 8p12	2189879	11	Deletion	1.42025
8	30361486	30549277	NM_001008711	RBPMS	8	28596881	30786759	1	8p21.1 - 8p12	2189879	11	Deletion	1.42025
8	30361486	30524572	NM_001008712	RBPMS	8	28596881	30786759	1	8p21.1 - 8p12	2189879	11	Deletion	1.42025
8	30361486	30549277	NM_006867	RBPMS	8	28596881	30786759	1	8p21.1 - 8p12	2189879	11	Deletion	1.42025
8	30555573	30635281	NM_002095	GTF2E2	8	28596881	30786759	1	8p21.1 - 8p12	2189879	11	Deletion	1.42025
8	30655120	30705029	NM_000637	GSR	8	28596881	30786759	1	8p21.1 - 8p12	2189879	11	Deletion	1.42025
8	30655120	30705029	NM_001195102	GSR	8	28596881	30786759	1	8p21.1 - 8p12	2189879	11	Deletion	1.42025
8	30655120	30705029	NM_001195103	GSR	8	28596881	30786759	1	8p21.1 - 8p12	2189879	11	Deletion	1.42025
8	30655120	30705029	NM_001195104	GSR	8	28596881	30786759	1	8p21.1 - 8p12	2189879	11	Deletion	1.42025
8	30721232	30744063	NM_005671	UBXN8	8	28596881	30786759	1	8p21.1 - 8p12	2189879	11	Deletion	1.42025
8	30762668	30789895	NM_001009552	PPP2CB	8	28596881	30786759	0.884824	8p21.1 - 8p12	2189879	11	Deletion	1.42025
8	30808602	30826076	NM_031271	TEX15	8	30810307	31737833	0.902432	8p12	927527	11	Deletion	1.40113
8	30972863	31010774	NM_001015508	PURG	8	30810307	31737833	1	8p12	927527	11	Deletion	1.40113
8	31007899	31009860	NM_013357	PURG	8	30810307	31737833	1	8p12	927527	11	Deletion	1.40113
8	31010320	31150820	NM_000553	WRN	8	30810307	31737833	1	8p12	927527	11	Deletion	1.40113
8	31616810	32720313	NM_013962	NRG1	8	30810307	31737833	0.109672	8p12	927527	11	Deletion	1.40113
18	660324	702663	NM_001126123	ENOSF1	18	700619	2506480	0.0482995	18p11.32	1805862	10	Deletion	1.30904
18	660324	702663	NM_017512	ENOSF1	18	700619	2506480	0.0482995	18p11.32	1805862	10	Deletion	1.30904
18	660324	702518	NM_202758	ENOSF1	18	700619	2506480	0.045029	18p11.32	1805862	10	Deletion	1.30904
18	711592	802328	NM_005433	YES1	18	700619	2506480	1	18p11.32	1805862	10	Deletion	1.30904
18	894944	902174	NM_001099733	ADCYAP1	18	700619	2506480	1	18p11.32	1805862	10	Deletion	1.30904
18	895297	902174	NM_001117	ADCYAP1	18	700619	2506480	1	18p11.32	1805862	10	Deletion	1.30904
18	1258312	1349631	NR_023925	C18orf2	18	700619	2506480	1	18p11.32	1805862	10	Deletion	1.30904
18	1258312	1349631	NR_023926	C18orf2	18	700619	2506480	1	18p11.32	1805862	10	Deletion	1.30904
18	1258312	1349631	NR_023927	C18orf2	18	700619	2506480	1	18p11.32	1805862	10	Deletion	1.30904
18	1258312	1349631	NR_023928	C18orf2	18	700619	2506480	1	18p11.32	1805862	10	Deletion	1.30904
18	3488837	3835297	NM_001003809	DLGAP1	18	3462638	3645940	0.453454	18p11.31	183303	10	Deletion	1.31256
18	3488837	3870136	NM_004746	DLGAP1	18	3462638	3645940	0.412022	18p11.31	183303	10	Deletion	1.31256
18	3488837	3870136	NM_004746	DLGAP1	18	3838213	4195970	0.0837241	18p11.31	357758	10	Deletion	1.32807
18	3584112	3587378	NR_024101	FLJ35776	18	3462638	3645940	1	18p11.31	183303	10	Deletion	1.31256
18	9092628	9124344	NM_021074	NDUFV2	18	8836123	9423338	1	18p11.22	587216	10	Deletion	1.28621
18	9126758	9275207	NM_001083625	ANKRD12	18	8836123	9423338	1	18p11.22	587216	10	Deletion	1.28621
18	9126758	9275207	NM_015208	ANKRD12	18	8836123	9423338	1	18p11.22	587216	10	Deletion	1.28621
18	9324765	9392419	NM_020648	TWSG1	18	8836123	9423338	1	18p11.22	587216	10	Deletion	1.28621
18	12244318	12267595	NM_001279	CIDEA	18	12185204	14985516	1	18p11.21	2800313	10	Deletion	1.29857
18	12244360	12267595	NR_036468	CIDEA	18	12185204	14985516	1	18p11.21	2800313	10	Deletion	1.29857
18	12298257	12316569	NM_032525	TUBB6	18	12185204	14985516	1	18p11.21	2800313	10	Deletion	1.29857
18	12318943	12367276	NM_006796	AFG3L2	18	12185204	14985516	1	18p11.21	2800313	10	Deletion	1.29857
18	12397895	12422237	NM_001142405	SLMO1	18	12185204	14985516	1	18p11.21	2800313	10	Deletion	1.29857
18	12397895	12422237	NM_006553	SLMO1	18	12185204	14985516	1	18p11.21	2800313	10	Deletion	1.29857
18	12436511	12647913	NM_001128626	SPIRE1	18	12185204	14985516	1	18p11.21	2800313	10	Deletion	1.29857
18	12436511	12646732	NM_001128627	SPIRE1	18	12185204	14985516	1	18p11.21	2800313	10	Deletion	1.29857
18	12436511	12647913	NM_020148	SPIRE1	18	12185204	14985516	1	18p11.21	2800313	10	Deletion	1.29857
18	12648738	12715740	NM_147163	PSMG2	18	12185204	14985516	1	18p11.21	2800313	10	Deletion	1.29857
18	12662631	12692704	NM_024899	CEP76	18	12185204	14985516	1	18p11.21	2800313	10	Deletion	1.29857
18	12692987	12715740	NM_020232	PSMG2	18	12185204	14985516	1	18p11.21	2800313	10	Deletion	1.29857
18	12775480	12874335	NM_080422	PTPN2	18	12185204	14985516	1	18p11.21	2800313	10	Deletion	1.29857
18	12775483	12874335	NM_080423	PTPN2	18	12185204	14985516	1	18p11.21	2800313	10	Deletion	1.29857
18	12783247	12874335	NM_002828	PTPN2	18	12185204	14985516	1	18p11.21	2800313	10	Deletion	1.29857
18	12937983	12977537	NM_001013437	SEH1L	18	12185204	14985516	1	18p11.21	2800313	10	Deletion	1.29857
18	12937983	12977537	NM_031216	SEH1L	18	12185204	14985516	1	18p11.21	2800313	10	Deletion	1.29857
18	12981361	13115052	NM_032142	CEP192	18	12185204	14985516	1	18p11.21	2800313	10	Deletion	1.29857
18	13208786	13642754	NM_181481	C18orf1	18	12185204	14985516	1	18p11.21	2800313	10	Deletion	1.29857
18	13208786	13642754	NM_181482	C18orf1	18	12185204	14985516	1	18p11.21	2800313	10	Deletion	1.29857
18	13601665	13642754	NM_001003674	C18orf1	18	12185204	14985516	1	18p11.21	2800313	10	Deletion	1.29857
18	13601665	13642754	NM_001003675	C18orf1	18	12185204	14985516	1	18p11.21	2800313	10	Deletion	1.29857
18	13610867	13642754	NM_004338	C18orf1	18	12185204	14985516	1	18p11.21	2800313	10	Deletion	1.29857
18	13610867	13642754	NM_181483	C18orf1	18	12185204	14985516	1	18p11.21	2800313	10	Deletion	1.29857
18	13653346	13716592	NM_001098801	C18orf19	18	12185204	14985516	1	18p11.21	2800313	10	Deletion	1.29857
18	13653346	13716592	NM_152352	C18orf19	18	12185204	14985516	1	18p11.21	2800313	10	Deletion	1.29857
18	13716704	13754555	NM_003799	RNMT	18	12185204	14985516	1	18p11.21	2800313	10	Deletion	1.29857
18	13815543	13816862	NM_005913	MC5R	18	12185204	14985516	1	18p11.21	2800313	10	Deletion	1.29857
18	13872043	13905536	NM_000529	MC2R	18	12185204	14985516	1	18p11.21	2800313	10	Deletion	1.29857
18	14065989	14122490	NR_033354	ZNF519	18	12185204	14985516	1	18p11.21	2800313	10	Deletion	1.29857
18	14089942	14122490	NM_145287	ZNF519	18	12185204	14985516	1	18p11.21	2800313	10	Deletion	1.29857
18	14327422	14332524	NR_026756	LOC284233	18	12185204	14985516	1	18p11.21	2800313	10	Deletion	1.29857
18	14467954	14488706	NR_024076	CXADRP3	18	12185204	14985516	1	18p11.21	2800313	10	Deletion	1.29857
18	14501737	14533600	NM_001137671	POTEC	18	12185204	14985516	1	18p11.21	2800313	10	Deletion	1.29857
18	14738239	14842738	NM_001145029	ANKRD30B	18	12185204	14985516	1	18p11.21	2800313	10	Deletion	1.29857
18	14820165	14820242	NR_036153	MIR3156-2	18	12185204	14985516	1	18p11.21	2800313	10	Deletion	1.29857
18	16783701	16945811	NM_005406	ROCK1	18	16818473	17187155	0.785505	18q11.1	368683	10	Deletion	1.28322
18	17076201	17356790	NM_001142966	GREB1L	18	16818473	17187155	0.395435	18q11.1	368683	10	Deletion	1.28322
18	17575543	17704911	NM_020774	MIB1	18	17542895	19255669	1	18q11.2	1712775	10	Deletion	1.29229
18	17659657	17659745	NR_029675	MIR133A1	18	17542895	19255669	1	18q11.2	1712775	10	Deletion	1.29229
18	17662963	17663048	NR_029662	MIR1-2	18	17542895	19255669	1	18q11.2	1712775	10	Deletion	1.29229
18	18003414	18036226	NM_005257	GATA6	18	17542895	19255669	1	18q11.2	1712775	10	Deletion	1.29229
18	18247562	18251877	NM_172241	CTAGE1	18	17542895	19255669	1	18q11.2	1712775	10	Deletion	1.29229
18	18767293	18860448	NM_002894	RBBP8	18	17542895	19255669	1	18q11.2	1712775	10	Deletion	1.29229
18	18767837	18860448	NM_203291	RBBP8	18	17542895	19255669	1	18q11.2	1712775	10	Deletion	1.29229
18	18767837	18860448	NM_203292	RBBP8	18	17542895	19255669	1	18q11.2	1712775	10	Deletion	1.29229
18	18968526	19094433	NR_023359	CABLES1	18	17542895	19255669	1	18q11.2	1712775	10	Deletion	1.29229
18	18969725	19094433	NM_001100619	CABLES1	18	17542895	19255669	1	18q11.2	1712775	10	Deletion	1.29229
18	18989787	19094433	NM_138375	CABLES1	18	17542895	19255669	1	18q11.2	1712775	10	Deletion	1.29229
18	19129977	19271924	NM_032933	C18orf45	18	17542895	19255669	0.885486	18q11.2	1712775	10	Deletion	1.29229
18	19523560	19789028	NM_001127717	LAMA3	18	19665580	19849826	0.465022	18q11.2	184247	10	Deletion	1.21818
18	19523560	19789028	NM_198129	LAMA3	18	19665580	19849826	0.465022	18q11.2	184247	10	Deletion	1.21818
18	19706982	19789028	NM_000227	LAMA3	18	19665580	19849826	1	18q11.2	184247	10	Deletion	1.21818
18	19706982	19789028	NM_001127718	LAMA3	18	19665580	19849826	1	18q11.2	184247	10	Deletion	1.21818
18	19826735	19969573	NM_153211	TTC39C	18	19665580	19849826	0.161665	18q11.2	184247	10	Deletion	1.21818
18	19848382	19969573	NM_001135993	TTC39C	18	19665580	19849826	0.0119232	18q11.2	184247	10	Deletion	1.21818
18	19848382	19854251	NR_024232	TTC39C	18	19665580	19849826	0.246167	18q11.2	184247	10	Deletion	1.21818
17	1909883	2153564	NM_001170957	SMG6	17	1911530	2816479	0.993241	17p13.3	904950	10	Deletion	1.24335
17	1909883	2153820	NM_017575	SMG6	17	1911530	2816479	0.993248	17p13.3	904950	10	Deletion	1.24335
17	2153998	2175304	NM_021947	SRR	17	1911530	2816479	1	17p13.3	904950	10	Deletion	1.24335
17	2172732	2187429	NM_018128	TSR1	17	1911530	2816479	1	17p13.3	904950	10	Deletion	1.24335
17	2179169	2179255	NR_003073	SNORD91B	17	1911530	2816479	1	17p13.3	904950	10	Deletion	1.24335
17	2180323	2180415	NR_003072	SNORD91A	17	1911530	2816479	1	17p13.3	904950	10	Deletion	1.24335
17	2187556	2231099	NM_014853	SGSM2	17	1911530	2816479	1	17p13.3	904950	10	Deletion	1.24335
17	2187558	2231099	NM_001098509	SGSM2	17	1911530	2816479	1	17p13.3	904950	10	Deletion	1.24335
17	2234104	2251009	NM_020310	MNT	17	1911530	2816479	1	17p13.3	904950	10	Deletion	1.24335
17	2257025	2265481	NR_028335	LOC284009	17	1911530	2816479	1	17p13.3	904950	10	Deletion	1.24335
17	2266098	2361951	NM_024086	METT10D	17	1911530	2816479	1	17p13.3	904950	10	Deletion	1.24335
17	2443673	2535660	NM_000430	PAFAH1B1	17	1911530	2816479	1	17p13.3	904950	10	Deletion	1.24335
17	2539430	2561678	NM_015229	KIAA0664	17	1911530	2816479	1	17p13.3	904950	10	Deletion	1.24335
17	2598122	2598227	NR_031654	MIR1253	17	1911530	2816479	1	17p13.3	904950	10	Deletion	1.24335
17	2646482	2887786	NM_001100398	RAP1GAP2	17	1911530	2816479	0.704494	17p13.3	904950	10	Deletion	1.24335
17	2646482	2887786	NM_015085	RAP1GAP2	17	1911530	2816479	0.704494	17p13.3	904950	10	Deletion	1.24335
17	2912713	2913652	NM_014566	OR1D5	17	2891933	2945487	1	17p13.3	53555	10	Deletion	1.24701
17	2942102	2943041	NM_002548	OR1D2	17	2891933	2945487	1	17p13.3	53555	10	Deletion	1.24701
17	3324154	3349451	NM_001128085	ASPA	17	3342231	3352110	0.285438	17p13.3	9880	10	Deletion	1.23207
17	3326046	3349451	NM_000049	ASPA	17	3342231	3352110	0.308511	17p13.3	9880	10	Deletion	1.23207
17	5126282	5229857	NM_001083585	RABEP1	17	5103900	5153396	0.261788	17p13.2	49497	10	Deletion	1.2661
17	5126282	5229857	NM_004703	RABEP1	17	5103900	5153396	0.261788	17p13.2	49497	10	Deletion	1.2661
17	5343471	5345044	NM_001162371	LOC728392	17	5339829	5474307	1	17p13.2	134479	10	Deletion	1.29371
17	5345443	5428557	NM_001033053	NLRP1	17	5339829	5474307	1	17p13.2	134479	10	Deletion	1.29371
17	5358162	5428557	NM_014922	NLRP1	17	5339829	5474307	1	17p13.2	134479	10	Deletion	1.29371
17	5358162	5428557	NM_033004	NLRP1	17	5339829	5474307	1	17p13.2	134479	10	Deletion	1.29371
17	5358162	5428557	NM_033006	NLRP1	17	5339829	5474307	1	17p13.2	134479	10	Deletion	1.29371
17	5358162	5428557	NM_033007	NLRP1	17	5339829	5474307	1	17p13.2	134479	10	Deletion	1.29371
17	5914658	5968472	NM_015253	WSCD1	17	5474307	6253449	1	17p13.2	779143	10	Deletion	1.26758
17	20707300	20740046	NM_001004306	CCDC144NL	17	20699899	20937840	1	17p11.2	237942	10	Deletion	1.32796
17	20843498	20886945	NM_015276	USP22	17	20699899	20937840	1	17p11.2	237942	10	Deletion	1.32796
17	20970850	21035429	NM_015510	DHRS7B	17	20937840	21446642	1	17p11.2	508803	10	Deletion	1.30919
17	21041855	21058501	NM_003876	TMEM11	17	20937840	21446642	1	17p11.2	508803	10	Deletion	1.30919
17	21041855	21058501	NR_024547	TMEM11	17	20937840	21446642	1	17p11.2	508803	10	Deletion	1.30919
17	21082776	21097172	NM_152914	C17orf103	17	20937840	21446642	1	17p11.2	508803	10	Deletion	1.30919
17	21128561	21159145	NM_145109	MAP2K3	17	20937840	21446642	1	17p11.2	508803	10	Deletion	1.30919
17	21131941	21159145	NM_002756	MAP2K3	17	20937840	21446642	1	17p11.2	508803	10	Deletion	1.30919
17	21220292	21263773	NM_021012	KCNJ12	17	20937840	21446642	1	17p11.2	508803	10	Deletion	1.30919
17	21249041	21261076	NM_001194958	KCNJ18	17	20937840	21446642	1	17p11.2	508803	10	Deletion	1.30919
17	21372164	21395535	NM_001113434	C17orf51	17	20937840	21446642	1	17p11.2	508803	10	Deletion	1.30919
8	7101836	7104847	NM_001164456.2	FAM90A13	8	6920672	7156124	1	8p23.1	235453	10	Deletion	1.411
8	7101836	7104847	NM_001164452.2	FAM90A14	8	6920672	7156124	1	8p23.1	235453	10	Deletion	1.411
8	7105551	7108425	NR_027000	LOC349196	8	6920672	7156124	1	8p23.1	235453	10	Deletion	1.411
8	7113173	7116047	NR_027000.1	LOC349196	8	6920672	7156124	1	8p23.1	235453	10	Deletion	1.411
8	7124702	7127713	NM_001164456.1	FAM90A13	8	6920672	7156124	1	8p23.1	235453	10	Deletion	1.411
8	7124702	7127713	NM_001164452.1	FAM90A14	8	6920672	7156124	1	8p23.1	235453	10	Deletion	1.411
8	7128417	7131291	NR_027000.2	LOC349196	8	6920672	7156124	1	8p23.1	235453	10	Deletion	1.411
8	7132324	7135335	NM_001164455	FAM90A5	8	6920672	7156124	1	8p23.1	235453	10	Deletion	1.411
8	7139946	7142957	NM_001164453	FAM90A20	8	6920672	7156124	1	8p23.1	235453	10	Deletion	1.411
8	7146543	7200287	NR_027423	FAM66B	8	6920672	7156124	0.178286	8p23.1	235453	10	Deletion	1.411
8	30762668	30789895	NM_001009552	PPP2CB	8	30786759	30810307	0.115212	8p12	23549	10	Deletion	1.41519
8	30808602	30826076	NM_031271	TEX15	8	30786759	30810307	0.0976252	8p12	23549	10	Deletion	1.41519
8	31616810	32720313	NM_013962	NRG1	8	31737833	34156719	0.890328	8p12	2418887	10	Deletion	1.41519
8	32525270	32705679	NM_001160002	NRG1	8	31737833	34156719	1	8p12	2418887	10	Deletion	1.41519
8	32525270	32742101	NM_001160004	NRG1	8	31737833	34156719	1	8p12	2418887	10	Deletion	1.41519
8	32525270	32720313	NM_001160005	NRG1	8	31737833	34156719	1	8p12	2418887	10	Deletion	1.41519
8	32525270	32705679	NM_001160007	NRG1	8	31737833	34156719	1	8p12	2418887	10	Deletion	1.41519
8	32525270	32738050	NM_001160008	NRG1	8	31737833	34156719	1	8p12	2418887	10	Deletion	1.41519
8	32525270	32705679	NM_004495	NRG1	8	31737833	34156719	1	8p12	2418887	10	Deletion	1.41519
8	32525270	32742101	NM_013956	NRG1	8	31737833	34156719	1	8p12	2418887	10	Deletion	1.41519
8	32525270	32742101	NM_013957	NRG1	8	31737833	34156719	1	8p12	2418887	10	Deletion	1.41519
8	32525270	32720313	NM_013958	NRG1	8	31737833	34156719	1	8p12	2418887	10	Deletion	1.41519
8	32525270	32742101	NM_013960	NRG1	8	31737833	34156719	1	8p12	2418887	10	Deletion	1.41519
8	32525270	32742101	NM_013964	NRG1	8	31737833	34156719	1	8p12	2418887	10	Deletion	1.41519
8	32572886	32742101	NM_001159995	NRG1	8	31737833	34156719	1	8p12	2418887	10	Deletion	1.41519
8	32572886	32742101	NM_001159999	NRG1	8	31737833	34156719	1	8p12	2418887	10	Deletion	1.41519
8	32572886	32742101	NM_001160001	NRG1	8	31737833	34156719	1	8p12	2418887	10	Deletion	1.41519
8	32623793	32720313	NM_013959	NRG1	8	31737833	34156719	1	8p12	2418887	10	Deletion	1.41519
8	32698893	32742101	NM_001159996	NRG1	8	31737833	34156719	1	8p12	2418887	10	Deletion	1.41519
8	33347886	33450207	NM_032664	FUT10	8	31737833	34156719	1	8p12	2418887	10	Deletion	1.41519
8	33462227	33478321	NM_032509	MAK16	8	31737833	34156719	1	8p12	2418887	10	Deletion	1.41519
8	33475778	33490246	NM_001102401	C8orf41	8	31737833	34156719	1	8p12	2418887	10	Deletion	1.41519
8	33475778	33490199	NM_025115	C8orf41	8	31737833	34156719	1	8p12	2418887	10	Deletion	1.41519
8	33524815	33544186	NM_024787	RNF122	8	31737833	34156719	1	8p12	2418887	10	Deletion	1.41519
8	33568393	33576982	NM_024025	DUSP26	8	31737833	34156719	1	8p12	2418887	10	Deletion	1.41519
18	99065	112223	NR_033770	ROCK1P1	18	2842	700619	1	18p11.32	697778	9	Deletion	1.28816
18	148483	203740	NM_001037334	USP14	18	2842	700619	1	18p11.32	697778	9	Deletion	1.28816
18	148483	203740	NM_005151	USP14	18	2842	700619	1	18p11.32	697778	9	Deletion	1.28816
18	204520	258060	NM_005131	THOC1	18	2842	700619	1	18p11.32	697778	9	Deletion	1.28816
18	309355	490730	NM_130386	COLEC12	18	2842	700619	1	18p11.32	697778	9	Deletion	1.28816
18	570369	571525	NM_004066	CETN1	18	2842	700619	1	18p11.32	697778	9	Deletion	1.28816
18	586998	640294	NM_014410	CLUL1	18	2842	700619	1	18p11.32	697778	9	Deletion	1.28816
18	606700	640294	NM_199167	CLUL1	18	2842	700619	1	18p11.32	697778	9	Deletion	1.28816
18	639620	648341	NM_001012716	C18orf56	18	2842	700619	1	18p11.32	697778	9	Deletion	1.28816
18	647604	663500	NM_001071	TYMS	18	2842	700619	1	18p11.32	697778	9	Deletion	1.28816
18	660324	702663	NM_001126123	ENOSF1	18	2842	700619	0.951724	18p11.32	697778	9	Deletion	1.28816
18	660324	702663	NM_017512	ENOSF1	18	2842	700619	0.951724	18p11.32	697778	9	Deletion	1.28816
18	660324	702518	NM_202758	ENOSF1	18	2842	700619	0.954995	18p11.32	697778	9	Deletion	1.28816
18	17076201	17356790	NM_001142966	GREB1L	18	17187155	17542895	0.604569	18q11.1 - 18q11.2	355741	9	Deletion	1.27162
18	17363260	17434692	NM_052911	ESCO1	18	17187155	17542895	1	18q11.1 - 18q11.2	355741	9	Deletion	1.27162
18	17446258	17464207	NM_006938	SNRPD1	18	17187155	17542895	1	18q11.1 - 18q11.2	355741	9	Deletion	1.27162
18	17484856	17538765	NM_138340	ABHD3	18	17187155	17542895	1	18q11.1 - 18q11.2	355741	9	Deletion	1.27162
18	17517469	17517557	NR_031565	MIR320C1	18	17187155	17542895	1	18q11.1 - 18q11.2	355741	9	Deletion	1.27162
18	19129977	19271924	NM_032933	C18orf45	18	19255669	19665580	0.114521	18q11.2	409912	9	Deletion	1.26968
18	19286785	19317098	NM_003831	RIOK3	18	19255669	19665580	1	18q11.2	409912	9	Deletion	1.26968
18	19337460	19365743	NM_013326	C18orf8	18	19255669	19665580	1	18q11.2	409912	9	Deletion	1.26968
18	19365461	19420580	NM_000271	NPC1	18	19255669	19665580	1	18q11.2	409912	9	Deletion	1.26968
18	19433976	19496848	NM_173505	ANKRD29	18	19255669	19665580	1	18q11.2	409912	9	Deletion	1.26968
18	19523560	19789028	NM_001127717	LAMA3	18	19255669	19665580	0.534981	18q11.2	409912	9	Deletion	1.26968
18	19523560	19789028	NM_198129	LAMA3	18	19255669	19665580	0.534981	18q11.2	409912	9	Deletion	1.26968
17	62180	202634	NM_001190411	RPH3AL	17	18901	1061016	1	17p13.3	1042116	9	Deletion	1.23052
17	62180	202634	NM_001190412	RPH3AL	17	18901	1061016	1	17p13.3	1042116	9	Deletion	1.23052
17	62180	202634	NM_001190413	RPH3AL	17	18901	1061016	1	17p13.3	1042116	9	Deletion	1.23052
17	62180	202634	NM_006987	RPH3AL	17	18901	1061016	1	17p13.3	1042116	9	Deletion	1.23052
17	260434	264804	NM_001013672	C17orf97	17	18901	1061016	1	17p13.3	1042116	9	Deletion	1.23052
17	289999	295960	NM_182705	FAM101B	17	18901	1061016	1	17p13.3	1042116	9	Deletion	1.23052
17	358658	564847	NM_001128159	VPS53	17	18901	1061016	1	17p13.3	1042116	9	Deletion	1.23052
17	382283	564847	NM_018289	VPS53	17	18901	1061016	1	17p13.3	1042116	9	Deletion	1.23052
17	582597	592826	NM_024792	FAM57A	17	18901	1061016	1	17p13.3	1042116	9	Deletion	1.23052
17	594411	602252	NM_015721	GEMIN4	17	18901	1061016	1	17p13.3	1042116	9	Deletion	1.23052
17	602650	605327	NR_024120	DBIL5P	17	18901	1061016	1	17p13.3	1042116	9	Deletion	1.23052
17	609299	632322	NM_016080	GLOD4	17	18901	1061016	1	17p13.3	1042116	9	Deletion	1.23052
17	632263	642492	NM_018146	RNMTL1	17	18901	1061016	1	17p13.3	1042116	9	Deletion	1.23052
17	649335	829761	NM_022463	NXN	17	18901	1061016	1	17p13.3	1042116	9	Deletion	1.23052
17	847107	852141	NM_013337	TIMM22	17	18901	1061016	1	17p13.3	1042116	9	Deletion	1.23052
17	853509	959075	NM_001092	ABR	17	18901	1061016	1	17p13.3	1042116	9	Deletion	1.23052
17	853509	1037367	NM_001159746	ABR	17	18901	1061016	1	17p13.3	1042116	9	Deletion	1.23052
17	853509	1029882	NM_021962	ABR	17	18901	1061016	1	17p13.3	1042116	9	Deletion	1.23052
17	872466	872550	NR_036148	MIR3183	17	18901	1061016	1	17p13.3	1042116	9	Deletion	1.23052
17	1612009	1627619	NM_002615	SERPINF1	17	1617164	1911530	0.669784	17p13.3	294367	9	Deletion	1.23457
17	1629579	1679926	NM_052928	SMYD4	17	1617164	1911530	1	17p13.3	294367	9	Deletion	1.23457
17	1680023	1749599	NM_002945	RPA1	17	1617164	1911530	1	17p13.3	294367	9	Deletion	1.23457
17	1784721	1874929	NM_178568	RTN4RL1	17	1617164	1911530	1	17p13.3	294367	9	Deletion	1.23457
17	1880181	1893476	NM_001383	DPH1	17	1617164	1911530	1	17p13.3	294367	9	Deletion	1.23457
17	1892027	1893476	NM_080822	OVCA2	17	1617164	1911530	1	17p13.3	294367	9	Deletion	1.23457
17	1899952	1900053	NR_029674	MIR132	17	1617164	1911530	1	17p13.3	294367	9	Deletion	1.23457
17	1900315	1900425	NR_029625	MIR212	17	1617164	1911530	1	17p13.3	294367	9	Deletion	1.23457
17	1905143	1909732	NM_006497	HIC1	17	1617164	1911530	1	17p13.3	294367	9	Deletion	1.23457
17	1906354	1909732	NM_001098202	HIC1	17	1617164	1911530	1	17p13.3	294367	9	Deletion	1.23457
17	1909883	2153564	NM_001170957	SMG6	17	1617164	1911530	0.00676291	17p13.3	294367	9	Deletion	1.23457
17	1909883	2153820	NM_017575	SMG6	17	1617164	1911530	0.00675581	17p13.3	294367	9	Deletion	1.23457
17	2976654	2977596	NM_003555	OR1G1	17	2945487	3342231	1	17p13.3	396745	9	Deletion	1.28029
17	3047563	3048493	NM_012352	OR1A2	17	2945487	3342231	1	17p13.3	396745	9	Deletion	1.28029
17	3065665	3066595	NM_014565	OR1A1	17	2945487	3342231	1	17p13.3	396745	9	Deletion	1.28029
17	3090720	3091310	NR_033795	OR1D4	17	2945487	3342231	1	17p13.3	396745	9	Deletion	1.28029
17	3127934	3129019	NM_002551	OR3A2	17	2945487	3342231	1	17p13.3	396745	9	Deletion	1.28029
17	3141679	3142627	NM_002550	OR3A1	17	2945487	3342231	1	17p13.3	396745	9	Deletion	1.28029
17	3160289	3161491	NR_024128	OR3A4	17	2945487	3342231	1	17p13.3	396745	9	Deletion	1.28029
17	3247510	3248455	NM_003553	OR1E1	17	2945487	3342231	1	17p13.3	396745	9	Deletion	1.28029
17	3270612	3271578	NM_012373	OR3A3	17	2945487	3342231	1	17p13.3	396745	9	Deletion	1.28029
17	3282914	3283886	NM_003554	OR1E2	17	2945487	3342231	1	17p13.3	396745	9	Deletion	1.28029
17	3290056	3321893	NM_001170695	SPATA22	17	2945487	3342231	1	17p13.3	396745	9	Deletion	1.28029
17	3290056	3321893	NM_001170696	SPATA22	17	2945487	3342231	1	17p13.3	396745	9	Deletion	1.28029
17	3290056	3321877	NM_001170697	SPATA22	17	2945487	3342231	1	17p13.3	396745	9	Deletion	1.28029
17	3290056	3321850	NM_001170698	SPATA22	17	2945487	3342231	1	17p13.3	396745	9	Deletion	1.28029
17	3290056	3321818	NM_001170699	SPATA22	17	2945487	3342231	1	17p13.3	396745	9	Deletion	1.28029
17	3290056	3321792	NM_032598	SPATA22	17	2945487	3342231	1	17p13.3	396745	9	Deletion	1.28029
17	3324154	3349451	NM_001128085	ASPA	17	2945487	3342231	0.714602	17p13.3	396745	9	Deletion	1.28029
17	3326046	3349451	NM_000049	ASPA	17	2945487	3342231	0.691532	17p13.3	396745	9	Deletion	1.28029
17	5126282	5229857	NM_001083585	RABEP1	17	5153396	5339829	0.738221	17p13.2	186434	9	Deletion	1.29321
17	5126282	5229857	NM_004703	RABEP1	17	5153396	5339829	0.738221	17p13.2	186434	9	Deletion	1.29321
17	5230070	5263784	NM_002532	NUP88	17	5153396	5339829	1	17p13.2	186434	9	Deletion	1.29321
17	5263685	5277065	NM_001033002	RPAIN	17	5153396	5339829	1	17p13.2	186434	9	Deletion	1.29321
17	5263685	5273710	NM_001160243	RPAIN	17	5153396	5339829	1	17p13.2	186434	9	Deletion	1.29321
17	5263685	5277065	NM_001160244	RPAIN	17	5153396	5339829	1	17p13.2	186434	9	Deletion	1.29321
17	5263685	5277065	NM_001160246	RPAIN	17	5153396	5339829	1	17p13.2	186434	9	Deletion	1.29321
17	5263685	5277065	NM_001160266	RPAIN	17	5153396	5339829	1	17p13.2	186434	9	Deletion	1.29321
17	5263685	5273710	NM_001160267	RPAIN	17	5153396	5339829	1	17p13.2	186434	9	Deletion	1.29321
17	5263685	5273710	NR_027678	RPAIN	17	5153396	5339829	1	17p13.2	186434	9	Deletion	1.29321
17	5263685	5273710	NR_027679	RPAIN	17	5153396	5339829	1	17p13.2	186434	9	Deletion	1.29321
17	5263685	5277065	NR_027680	RPAIN	17	5153396	5339829	1	17p13.2	186434	9	Deletion	1.29321
17	5263685	5277065	NR_027681	RPAIN	17	5153396	5339829	1	17p13.2	186434	9	Deletion	1.29321
17	5263685	5277065	NR_027682	RPAIN	17	5153396	5339829	1	17p13.2	186434	9	Deletion	1.29321
17	5263685	5277065	NR_027683	RPAIN	17	5153396	5339829	1	17p13.2	186434	9	Deletion	1.29321
17	5263685	5277065	NR_027684	RPAIN	17	5153396	5339829	1	17p13.2	186434	9	Deletion	1.29321
17	5263685	5277065	NR_027685	RPAIN	17	5153396	5339829	1	17p13.2	186434	9	Deletion	1.29321
17	5276823	5283196	NM_001212	C1QBP	17	5153396	5339829	1	17p13.2	186434	9	Deletion	1.29321
17	5284956	5313105	NM_001199699	DHX33	17	5153396	5339829	1	17p13.2	186434	9	Deletion	1.29321
17	5284956	5313105	NM_020162	DHX33	17	5153396	5339829	1	17p13.2	186434	9	Deletion	1.29321
17	5318337	5330219	NM_016041	DERL2	17	5153396	5339829	1	17p13.2	186434	9	Deletion	1.29321
17	5330971	5334855	NM_024039	MIS12	17	5153396	5339829	1	17p13.2	186434	9	Deletion	1.29321
17	21749497	21750627	NR_028336	FAM27L	17	21446642	22067966	1	17p11.2	621325	9	Deletion	1.32631
17	21828189	21837198	NR_027084	FLJ36000	17	21446642	22067966	1	17p11.2	621325	9	Deletion	1.32631
17	21946564	21948119	NM_001190452	MTRNR2L1	17	21446642	22067966	1	17p11.2	621325	9	Deletion	1.32631
9	21957751	21965133	NM_000077	CDKN2A	9	21961724	22256387	0.461872	9p21.3	294664	9	Deletion	1.27535
9	21957751	21965133	NM_001195132	CDKN2A	9	21961724	22256387	0.461872	9p21.3	294664	9	Deletion	1.27535
9	21957751	21984491	NM_058195	CDKN2A	9	21961724	22256387	0.851427	9p21.3	294664	9	Deletion	1.27535
9	21957751	21964827	NM_058197	CDKN2A	9	21961724	22256387	0.438604	9p21.3	294664	9	Deletion	1.27535
9	21984790	22111094	NR_003529	CDKN2B-AS1	9	21961724	22256387	1	9p21.3	294664	9	Deletion	1.27535
9	21992902	21999313	NM_004936	CDKN2B	9	21961724	22256387	1	9p21.3	294664	9	Deletion	1.27535
9	21992902	21999313	NM_078487	CDKN2B	9	21961724	22256387	1	9p21.3	294664	9	Deletion	1.27535
1	3394366	3517920	NM_001409	MEGF6	1	3515600	3920296	0.0187852	1p36.32	404697	9	Deletion	1.34896
1	3531416	3536555	NM_182752	TPRG1L	1	3515600	3920296	1	1p36.32	404697	9	Deletion	1.34896
1	3537191	3556532	NM_017818	WDR8	1	3515600	3920296	1	1p36.32	404697	9	Deletion	1.34896
1	3558989	3640328	NM_005427	TP73	1	3515600	3920296	1	1p36.32	404697	9	Deletion	1.34896
1	3597096	3640328	NM_001126240	TP73	1	3515600	3920296	1	1p36.32	404697	9	Deletion	1.34896
1	3597096	3640328	NM_001126241	TP73	1	3515600	3920296	1	1p36.32	404697	9	Deletion	1.34896
1	3597096	3640328	NM_001126242	TP73	1	3515600	3920296	1	1p36.32	404697	9	Deletion	1.34896
1	3642408	3653798	NR_033708	KIAA0495	1	3515600	3920296	1	1p36.32	404697	9	Deletion	1.34896
1	3642408	3653798	NR_033709	KIAA0495	1	3515600	3920296	1	1p36.32	404697	9	Deletion	1.34896
1	3642408	3653798	NR_033710	KIAA0495	1	3515600	3920296	1	1p36.32	404697	9	Deletion	1.34896
1	3642408	3653798	NR_033711	KIAA0495	1	3515600	3920296	1	1p36.32	404697	9	Deletion	1.34896
1	3642408	3653196	NR_033712	KIAA0495	1	3515600	3920296	1	1p36.32	404697	9	Deletion	1.34896
1	3658825	3678070	NM_152492	CCDC27	1	3515600	3920296	1	1p36.32	404697	9	Deletion	1.34896
1	3679212	3682407	NM_001163724	LOC388588	1	3515600	3920296	1	1p36.32	404697	9	Deletion	1.34896
1	3686644	3702929	NM_020710	LRRC47	1	3515600	3920296	1	1p36.32	404697	9	Deletion	1.34896
1	3718505	3763658	NM_014704	KIAA0562	1	3515600	3920296	1	1p36.32	404697	9	Deletion	1.34896
1	3763705	3791854	NM_004402	DFFB	1	3515600	3920296	1	1p36.32	404697	9	Deletion	1.34896
1	3795557	3806718	NM_207356	C1orf174	1	3515600	3920296	1	1p36.32	404697	9	Deletion	1.34896
1	3806828	3821872	NR_024455	LOC100133612	1	3515600	3920296	1	1p36.32	404697	9	Deletion	1.34896
